# Supplementary material for: Inference of the Life Cycle of Environmental Phages from Genomic Signature Distances to Their Hosts
Source: Viruses. 2023 May 19;15(5):1196. doi: 10.3390/v15051196 (PMC10222151; doi:10.3390/v15051196)
Supplement: Supplementary file 1 [file viruses-15-01196-s001.zip › SupplementaryTables.xlsx]

## Sheet: Table S1
Supplementary Table S1: Bacterial genomes in the reference set
Host_GI_NCBI	Host_ref_NCBI	Host_strain	Host_species	Host_genus	Cluster_number	Cluster_name
1206269229	LT883153.1	Salmonella enterica subsp. enterica serovar Typhi strain ERL12148	Salmonella enterica	Salmonella	0	Salmonella
1227954118	LT904852.1	Salmonella enterica subsp. enterica serovar Typhi strain TY585	Salmonella enterica	Salmonella	0	Salmonella
1227954120	LT904854.1	Salmonella enterica subsp. enterica serovar Typhi strain M223	Salmonella enterica	Salmonella	0	Salmonella
1227954121	LT904867.1	Salmonella enterica subsp. enterica serovar Typhi strain ERL034151	Salmonella enterica	Salmonella	0	Salmonella
1227954122	LT904868.1	Salmonella enterica subsp. enterica serovar Typhi strain H12ESR04734-001A	Salmonella enterica	Salmonella	0	Salmonella
1227954123	LT904869.1	Salmonella enterica subsp. enterica serovar Typhi strain ERL052042	Salmonella enterica	Salmonella	0	Salmonella
1227954125	LT904871.1	Salmonella enterica subsp. enterica serovar Typhi strain 1553	Salmonella enterica	Salmonella	0	Salmonella
1227954126	LT904872.1	Salmonella enterica subsp. enterica serovar Typhi strain ERL11909	Salmonella enterica	Salmonella	0	Salmonella
1227954129	LT904875.1	Salmonella enterica subsp. enterica serovar Typhi strain ERL024919	Salmonella enterica	Salmonella	0	Salmonella
1227954130	LT904876.1	Salmonella enterica subsp. enterica serovar Typhi strain ERL114000	Salmonella enterica	Salmonella	0	Salmonella
1227954131	LT904877.1	Salmonella enterica subsp. enterica serovar Typhi strain SGB92	Salmonella enterica	Salmonella	0	Salmonella
1227954132	LT904878.1	Salmonella enterica subsp. enterica serovar Typhi strain ty3-193	Salmonella enterica	Salmonella	0	Salmonella
1227954135	LT904881.1	Salmonella enterica subsp. enterica serovar Typhi strain UI2120	Salmonella enterica	Salmonella	0	Salmonella
1227954136	LT904882.1	Salmonella enterica subsp. enterica serovar Typhi strain SGB89	Salmonella enterica	Salmonella	0	Salmonella
1227954137	LT904883.1	Salmonella enterica subsp. enterica serovar Typhi strain ERL103914	Salmonella enterica	Salmonella	0	Salmonella
1227954138	LT904884.1	Salmonella enterica subsp. enterica serovar Typhi strain ERL041834	Salmonella enterica	Salmonella	0	Salmonella
1227954139	LT904885.1	Salmonella enterica subsp. enterica serovar Typhi strain 1036491	Salmonella enterica	Salmonella	0	Salmonella
1227954140	LT904886.1	Salmonella enterica subsp. enterica serovar Typhi strain SGB82	Salmonella enterica	Salmonella	0	Salmonella
1227954141	LT904887.1	Salmonella enterica subsp. enterica serovar Typhi strain 76-1292	Salmonella enterica	Salmonella	0	Salmonella
1227954142	LT904888.1	Salmonella enterica subsp. enterica serovar Typhi strain 129-0238-M	Salmonella enterica	Salmonella	0	Salmonella
1227954144	LT904890.1	Salmonella enterica subsp. enterica serovar Typhi strain H12ESR00394-001A	Salmonella enterica	Salmonella	0	Salmonella
1227954145	LT904891.1	Salmonella enterica subsp. enterica serovar Typhi strain 80-2002	Salmonella enterica	Salmonella	0	Salmonella
1227954147	LT904893.1	Salmonella enterica subsp. enterica serovar Typhi strain 1016889	Salmonella enterica	Salmonella	0	Salmonella
1227954148	LT904894.1	Salmonella enterica subsp. enterica serovar Typhi strain ERL12960	Salmonella enterica	Salmonella	0	Salmonella
1227954150	LT905060.1	Salmonella enterica subsp. enterica serovar Typhi isolate ISP_03_07467_SGB110-sc-1979083	Salmonella enterica	Salmonella	0	Salmonella
1227954157	LT905088.1	Salmonella enterica subsp. enterica serovar Typhi strain ERL024120	Salmonella enterica	Salmonella	0	Salmonella
1227954159	LT905090.1	Salmonella enterica subsp. enterica serovar Typhi strain ty3-243	Salmonella enterica	Salmonella	0	Salmonella
1227954162	LT905141.1	Salmonella enterica subsp. enterica serovar Typhi strain OVG_041	Salmonella enterica	Salmonella	0	Salmonella
1227954163	LT905142.1	Salmonella enterica subsp. enterica serovar Typhi strain H12ESR00755-001A	Salmonella enterica	Salmonella	0	Salmonella
1233832988	LT904870.2	Salmonella enterica subsp. enterica serovar Typhi strain SGB90	Salmonella enterica	Salmonella	0	Salmonella
1539180906	LR133909.1	Salmonella enterica subsp. enterica serovar Daytona strain NCTC7102	Salmonella enterica	Salmonella	0	Salmonella
1539186722	LR133910.1	Salmonella enterica subsp. arizonae strain NCTC7300	Salmonella enterica	Salmonella	0	Salmonella
1539329289	LR134140.1	Salmonella enterica subsp. enterica strain NCTC129	Salmonella enterica	Salmonella	0	Salmonella
1539335410	LR134141.1	Salmonella enterica subsp. salamae strain NCTC5773	Salmonella enterica	Salmonella	0	Salmonella
1539340327	LR134142.1	Salmonella enterica subsp. enterica serovar Sanjuan strain NCTC7406	Salmonella enterica	Salmonella	0	Salmonella
1539345407	LR134143.1	Salmonella enterica subsp. enterica strain NCTC7411	Salmonella enterica	Salmonella	0	Salmonella
1539349897	LR134144.1	Salmonella enterica subsp. enterica strain NCTC7404	Salmonella enterica	Salmonella	0	Salmonella
1539354260	LR134145.1	Salmonella enterica subsp. enterica strain NCTC6017	Salmonella enterica	Salmonella	0	Salmonella
1539359393	LR134146.1	Salmonella enterica subsp. enterica strain NCTC6759	Salmonella enterica	Salmonella	0	Salmonella
1539364171	LR134147.1	Salmonella enterica subsp. enterica strain NCTC7831	Salmonella enterica	Salmonella	0	Salmonella
1539368953	LR134148.1	Salmonella enterica subsp. enterica strain NCTC8271	Salmonella enterica	Salmonella	0	Salmonella
1539374589	LR134149.1	Salmonella enterica subsp. enterica strain NCTC8272	Salmonella enterica	Salmonella	0	Salmonella
1539380133	LR134150.1	Salmonella enterica subsp. arizonae strain NCTC7306	Salmonella enterica	Salmonella	0	Salmonella
1539394406	LR134153.1	Salmonella enterica subsp. enterica strain NCTC8267	Salmonella enterica	Salmonella	0	Salmonella
1539399207	LR134154.1	Salmonella enterica subsp. salamae strain NCTC8273	Salmonella enterica	Salmonella	0	Salmonella
1539409596	LR134156.1	Salmonella enterica subsp. arizonae strain NCTC10047	Salmonella enterica	Salmonella	0	Salmonella
1539419945	LR134158.1	Salmonella enterica subsp. enterica serovar Goldcoast strain NCTC13175	Salmonella enterica	Salmonella	0	Salmonella
1539424345	LR134159.1	Salmonella enterica subsp. houtenae strain NCTC7318	Salmonella enterica	Salmonella	0	Salmonella
1539481233	LR134187.1	Salmonella enterica subsp. enterica serovar Havana strain NCTC6086	Salmonella enterica	Salmonella	0	Salmonella
1539489531	LR134190.1	Salmonella enterica subsp. enterica strain NCTC6754	Salmonella enterica	Salmonella	0	Salmonella
1539621426	LR134232.1	Salmonella enterica subsp. enterica strain NCTC5741	Salmonella enterica	Salmonella	0	Salmonella
1539625749	LR134233.1	Salmonella enterica subsp. enterica strain NCTC9684	Salmonella enterica	Salmonella	0	Salmonella
2063320666	LT904777.2	Salmonella enterica subsp. enterica serovar Typhi strain ERL072973	Salmonella enterica	Salmonella	0	Salmonella
1553426572	NZ_CP034831.1	Salmonella sp. SSDFZ69	Salmonella sp.	Salmonella	0	Salmonella
1553441800	NZ_CP034819.1	Salmonella sp. SSDFZ54	Salmonella sp.	Salmonella	0	Salmonella
1844045272	NZ_CP051218.1	Salmonella sp. SCFS4	Salmonella sp.	Salmonella	0	Salmonella
1933730107	NZ_CP064674.1	Salmonella sp. SJTUF14076	Salmonella sp.	Salmonella	0	Salmonella
1933730137	NZ_CP064671.1	Salmonella sp. SJTUF14152	Salmonella sp.	Salmonella	0	Salmonella
1933730142	NZ_CP064672.1	Salmonella sp. SJTUF14146	Salmonella sp.	Salmonella	0	Salmonella
1933730161	NZ_CP064666.1	Salmonella sp. SJTUF14154	Salmonella sp.	Salmonella	0	Salmonella
1933739323	NZ_CP064661.1	Salmonella sp. SJTUF14178	Salmonella sp.	Salmonella	0	Salmonella
1933739393	NZ_CP064663.1	Salmonella sp. SJTUF14170	Salmonella sp.	Salmonella	0	Salmonella
2007898623	NZ_CP071693.1	Salmonella sp. SAL-045	Salmonella sp.	Salmonella	0	Salmonella
2007941674	NZ_CP071690.1	Salmonella sp. SAL-020	Salmonella sp.	Salmonella	0	Salmonella
2007942004	NZ_CP071686.1	Salmonella sp. SAL-007	Salmonella sp.	Salmonella	0	Salmonella
2044993192	NZ_CP074428.1	Salmonella sp. SJTUF14523	Salmonella sp.	Salmonella	0	Salmonella
2045097871	NZ_CP074425.1	Salmonella sp. SJTUF15034	Salmonella sp.	Salmonella	0	Salmonella
2104002491	NZ_CP083731.1	Salmonella sp. A29-2	Salmonella sp.	Salmonella	0	Salmonella
2105156959	NZ_CP084001.1	Salmonella sp. A7	Salmonella sp.	Salmonella	0	Salmonella
2107086669	NZ_CP084216.1	Salmonella sp. JXY0409-18	Salmonella sp.	Salmonella	0	Salmonella
2107138884	NZ_CP084194.1	Salmonella sp. A39	Salmonella sp.	Salmonella	0	Salmonella
82542618	NC_007613.1	Shigella boydii Sb227	Shigella boydii	Shigella	1	Escherichia/Shigella
187730020	NC_010658.1	Shigella boydii CDC 3083-94	Shigella boydii	Shigella	1	Escherichia/Shigella
844762407	NZ_CP011511.1	Shigella boydii strain ATCC 9210	Shigella boydii	Shigella	1	Escherichia/Shigella
1347826449	CP026731.1	Shigella boydii strain ATCC 8700	Shigella boydii	Shigella	1	Escherichia/Shigella
1347826463	CP026810.1	Shigella boydii strain 54-1621	Shigella boydii	Shigella	1	Escherichia/Shigella
1347826566	CP026846.1	Shigella boydii strain 59-2708	Shigella boydii	Shigella	1	Escherichia/Shigella
1347826609	CP026866.1	Shigella boydii strain ATCC 12027	Shigella boydii	Shigella	1	Escherichia/Shigella
1347826615	CP026877.1	Shigella boydii strain ATCC 35964	Shigella boydii	Shigella	1	Escherichia/Shigella
1347826620	CP026836.1	Shigella boydii strain ATCC 49812	Shigella boydii	Shigella	1	Escherichia/Shigella
1347826633	CP026797.1	Shigella boydii strain NCTC 9353	Shigella boydii	Shigella	1	Escherichia/Shigella
1347826638	CP026845.1	Shigella boydii strain NCTC 9733	Shigella boydii	Shigella	1	Escherichia/Shigella
1347826641	CP026875.1	Shigella boydii strain NCTC 9734	Shigella boydii	Shigella	1	Escherichia/Shigella
1349637826	CP026867.1	Shigella boydii strain DMB SH135	Shigella boydii	Shigella	1	Escherichia/Shigella
1605361276	NZ_CP026762.1	Shigella boydii strain NCTC 9850	Shigella boydii	Shigella	1	Escherichia/Shigella
1605369489	NZ_CP026766.1	Shigella boydii strain 59-248	Shigella boydii	Shigella	1	Escherichia/Shigella
1605369508	NZ_CP026814.1	Shigella boydii strain 83-578	Shigella boydii	Shigella	1	Escherichia/Shigella
1605479203	NZ_CP026795.1	Shigella boydii strain ATCC BAA-1247	Shigella boydii	Shigella	1	Escherichia/Shigella
1714220321	NZ_CP041513.1	Shigella boydii strain KCCM 41690	Shigella boydii	Shigella	1	Escherichia/Shigella
1783207358	NZ_CP024693.1	Shigella boydii strain 80	Shigella boydii	Shigella	1	Escherichia/Shigella
1866753949	CP049278.1	Shigella boydii strain 600690	Shigella boydii	Shigella	1	Escherichia/Shigella
1866753952	CP049606.1	Shigella boydii strain 600080	Shigella boydii	Shigella	1	Escherichia/Shigella
1867837007	NZ_CP049281.1	Shigella boydii strain 600657	Shigella boydii	Shigella	1	Escherichia/Shigella
1867857953	NZ_CP049285.1	Shigella boydii strain 602068	Shigella boydii	Shigella	1	Escherichia/Shigella
1959201736	NZ_CP068090.1	Shigella boydii strain FDAARGOS_1139	Shigella boydii	Shigella	1	Escherichia/Shigella
2021335197	NZ_CP024694.1	Shigella boydii strain 183	Shigella boydii	Shigella	1	Escherichia/Shigella
2021345846	NZ_CP024695.1	Shigella boydii strain 192	Shigella boydii	Shigella	1	Escherichia/Shigella
424836542	NZ_CM001474.1	Shigella flexneri 5a str. M90T	Shigella flexneri	Shigella	1	Escherichia/Shigella
675096362	CP004057.1	Shigella flexneri Shi06HN006	Shigella flexneri	Shigella	1	Escherichia/Shigella
713634386	LM651928.1	Shigella flexneri genome assembly NCTC1,	Shigella flexneri	Shigella	1	Escherichia/Shigella
749295049	NZ_CP004056.1	Shigella flexneri 2003036 isolate Human	Shigella flexneri	Shigella	1	Escherichia/Shigella
828440138	CP007037.1	Shigella flexneri G1663	Shigella flexneri	Shigella	1	Escherichia/Shigella
1002167400	CP012735.1	Shigella flexneri 1a strain 0228	Shigella flexneri	Shigella	1	Escherichia/Shigella
1002749888	CP012137.1	Shigella flexneri 2a strain 981	Shigella flexneri	Shigella	1	Escherichia/Shigella
1002754655	CP012140.1	Shigella flexneri 4c strain 1205	Shigella flexneri	Shigella	1	Escherichia/Shigella
1227272262	CP020336.1	Shigella flexneri 4c strain 1602	Shigella flexneri	Shigella	1	Escherichia/Shigella
1227276834	CP020339.1	Shigella flexneri 4c strain 0702	Shigella flexneri	Shigella	1	Escherichia/Shigella
1227281168	CP020342.1	Shigella flexneri 1a strain 0439	Shigella flexneri	Shigella	1	Escherichia/Shigella
1227300375	CP020086.1	Shigella flexneri 1a strain 0670	Shigella flexneri	Shigella	1	Escherichia/Shigella
1250053806	CP020753.1	Shigella flexneri 1c strain Y394	Shigella flexneri	Shigella	1	Escherichia/Shigella
1273279044	CP024473.1	Shigella flexneri 7b strain 94-3007	Shigella flexneri	Shigella	1	Escherichia/Shigella
1336535679	CP026098.1	Shigella flexneri strain FDAARGOS_74	Shigella flexneri	Shigella	1	Escherichia/Shigella
1347826452	CP026803.1	Shigella flexneri strain 89-141	Shigella flexneri	Shigella	1	Escherichia/Shigella
1347826457	CP026765.1	Shigella flexneri strain 04-3145	Shigella flexneri	Shigella	1	Escherichia/Shigella
1347826567	CP026811.1	Shigella flexneri strain 64-5500	Shigella flexneri	Shigella	1	Escherichia/Shigella
1347826574	CP026768.1	Shigella flexneri Y strain 93-3063	Shigella flexneri	Shigella	1	Escherichia/Shigella
1347826578	CP026772.1	Shigella flexneri strain 95-3008	Shigella flexneri	Shigella	1	Escherichia/Shigella
1347826588	CP026776.1	Shigella flexneri strain 98-3193	Shigella flexneri	Shigella	1	Escherichia/Shigella
1347826631	CP026793.1	Shigella flexneri strain 74-1170	Shigella flexneri	Shigella	1	Escherichia/Shigella
1349676396	CP026788.1	Shigella flexneri 2a strain ATCC 29903	Shigella flexneri	Shigella	1	Escherichia/Shigella
1430094356	CP030915.1	Shigella flexneri 2a strain 1508	Shigella flexneri	Shigella	1	Escherichia/Shigella
1511404824	CP033510.1	Shigella flexneri strain 2016AM-0877	Shigella flexneri	Shigella	1	Escherichia/Shigella
1526094037	CP034060.1	Shigella flexneri strain FDAARGOS_535	Shigella flexneri	Shigella	1	Escherichia/Shigella
1571377394	CP032513.1	Shigella flexneri strain SFL1520	Shigella flexneri	Shigella	1	Escherichia/Shigella
1584159152	NZ_LR213452.1	Shigella flexneri strain AUSMDU00008355 isolate AUSMDU00008355	Shigella flexneri	Shigella	1	Escherichia/Shigella
1600734721	CP037996.1	Shigella flexneri strain FC906	Shigella flexneri	Shigella	1	Escherichia/Shigella
1605363434	NZ_CP026871.1	Shigella flexneri strain 73-5612	Shigella flexneri	Shigella	1	Escherichia/Shigella
1605363641	NZ_LR213455.1	Shigella flexneri strain AUSMDU00008332 isolate AUSMDU00008332	Shigella flexneri	Shigella	1	Escherichia/Shigella
1605364910	NZ_CP026792.1	Shigella flexneri strain 61-4982	Shigella flexneri	Shigella	1	Escherichia/Shigella
1605375681	NZ_CP026799.1	Shigella flexneri strain NCTC 9728	Shigella flexneri	Shigella	1	Escherichia/Shigella
1624203443	NZ_CP037923.1	Shigella flexneri 5a str. M90T	Shigella flexneri	Shigella	1	Escherichia/Shigella
1741227037	NZ_CP042980.1	Shigella flexneri Y strain PE577	Shigella flexneri	Shigella	1	Escherichia/Shigella
1752751021	CP044152.1	Shigella flexneri strain AR-0425	Shigella flexneri	Shigella	1	Escherichia/Shigella
1752751024	CP044155.1	Shigella flexneri strain AR-0424	Shigella flexneri	Shigella	1	Escherichia/Shigella
1752751041	CP044158.1	Shigella flexneri strain AR-0423	Shigella flexneri	Shigella	1	Escherichia/Shigella
1759329011	NZ_CP024470.1	Shigella flexneri strain 71-2783	Shigella flexneri	Shigella	1	Escherichia/Shigella
1776219371	CP045941.1	Shigella flexneri 2a strain AUSMDU00010535	Shigella flexneri	Shigella	1	Escherichia/Shigella
1778637535	NZ_CP041620.1	Shigella flexneri strain C32	Shigella flexneri	Shigella	1	Escherichia/Shigella
1783207467	NZ_CP024984.1	Shigella flexneri strain 837	Shigella flexneri	Shigella	1	Escherichia/Shigella
1783244028	NZ_CP024981.1	Shigella flexneri strain 201	Shigella flexneri	Shigella	1	Escherichia/Shigella
1783244035	NZ_CP024983.1	Shigella flexneri strain 36P	Shigella flexneri	Shigella	1	Escherichia/Shigella
1802110562	CP045522.1	Shigella flexneri strain 5908.2	Shigella flexneri	Shigella	1	Escherichia/Shigella
1805980839	CP034931.1	Shigella flexneri strain 2013C-3749	Shigella flexneri	Shigella	1	Escherichia/Shigella
1830056694	CP050985.1	Shigella flexneri strain FDAARGOS_716	Shigella flexneri	Shigella	1	Escherichia/Shigella
1860176239	CP054886.1	Shigella flexneri strain FDAARGOS_689	Shigella flexneri	Shigella	1	Escherichia/Shigella
1860187476	CP054892.1	Shigella flexneri strain FDAARGOS_713	Shigella flexneri	Shigella	1	Escherichia/Shigella
1860439344	CP055138.1	Shigella flexneri strain FDAARGOS_690	Shigella flexneri	Shigella	1	Escherichia/Shigella
1860443381	CP055124.1	Shigella flexneri strain FDAARGOS_714	Shigella flexneri	Shigella	1	Escherichia/Shigella
1861018182	NZ_CP054913.1	Shigella flexneri strain FDAARGOS_691	Shigella flexneri	Shigella	1	Escherichia/Shigella
1861699155	NZ_CP055132.1	Shigella flexneri strain FDAARGOS_692	Shigella flexneri	Shigella	1	Escherichia/Shigella
1868917167	CP058589.1	Shigella flexneri strain M2901	Shigella flexneri	Shigella	1	Escherichia/Shigella
1905166120	LR861785.1	Shigella flexneri strain AUSMDU00021847	Shigella flexneri	Shigella	1	Escherichia/Shigella
1905166160	LR861788.1	Shigella flexneri strain AUSMDU00022017	Shigella flexneri	Shigella	1	Escherichia/Shigella
1954821574	CP066809.1	Shigella flexneri 3a strain 888048	Shigella flexneri	Shigella	1	Escherichia/Shigella
2020396138	NZ_CP024982.1	Shigella flexneri strain 113	Shigella flexneri	Shigella	1	Escherichia/Shigella
2087404565	NZ_CP081813.1	Shigella flexneri strain WW1	Shigella flexneri	Shigella	1	Escherichia/Shigella
2186119783	NZ_LR878365.1	Shigella flexneri 3a isolate 83	Shigella flexneri	Shigella	1	Escherichia/Shigella
2198917943	NZ_CP055170.1	Shigella flexneri strain STEFF_22	Shigella flexneri	Shigella	1	Escherichia/Shigella
2198918465	NZ_CP055000.1	Shigella flexneri strain STIN_80	Shigella flexneri	Shigella	1	Escherichia/Shigella
2198919874	NZ_CP055015.1	Shigella flexneri strain SWHEFF_71	Shigella flexneri	Shigella	1	Escherichia/Shigella
2198921053	NZ_CP055030.1	Shigella flexneri strain SWHEFF_64	Shigella flexneri	Shigella	1	Escherichia/Shigella
2198932169	NZ_CP055109.1	Shigella flexneri strain SWHIN_104	Shigella flexneri	Shigella	1	Escherichia/Shigella
2198932817	NZ_CP055092.1	Shigella flexneri strain SWHIN_110	Shigella flexneri	Shigella	1	Escherichia/Shigella
2198934178	NZ_CP055070.1	Shigella flexneri strain SWHIN_97	Shigella flexneri	Shigella	1	Escherichia/Shigella
2198940230	NZ_CP054992.1	Shigella flexneri strain STIN_87	Shigella flexneri	Shigella	1	Escherichia/Shigella
2198940882	NZ_CP055167.1	Shigella flexneri strain STEFF_24	Shigella flexneri	Shigella	1	Escherichia/Shigella
2198945459	NZ_CP055024.1	Shigella flexneri strain SWHEFF_67	Shigella flexneri	Shigella	1	Escherichia/Shigella
2198946717	NZ_CP055184.1	Shigella flexneri strain STEFF_16	Shigella flexneri	Shigella	1	Escherichia/Shigella
2198951200	NZ_CP055113.1	Shigella flexneri strain SWHIN_101	Shigella flexneri	Shigella	1	Escherichia/Shigella
2198963883	NZ_CP055075.1	Shigella flexneri strain SWHIN_116	Shigella flexneri	Shigella	1	Escherichia/Shigella
2198965153	NZ_CP054977.1	Shigella flexneri strain STIN_92	Shigella flexneri	Shigella	1	Escherichia/Shigella
2198966074	NZ_CP055219.1	Shigella flexneri strain STEFF_12	Shigella flexneri	Shigella	1	Escherichia/Shigella
2198966284	NZ_CP055179.1	Shigella flexneri strain STEFF_18	Shigella flexneri	Shigella	1	Escherichia/Shigella
2198966544	NZ_CP055037.1	Shigella flexneri strain SWHEFF_60	Shigella flexneri	Shigella	1	Escherichia/Shigella
2198966879	NZ_CP055194.1	Shigella flexneri strain STEFF_10	Shigella flexneri	Shigella	1	Escherichia/Shigella
2198966985	NZ_CP055199.1	Shigella flexneri strain STEFF_3	Shigella flexneri	Shigella	1	Escherichia/Shigella
2198967096	NZ_CP055041.1	Shigella flexneri strain SWHEFF_59	Shigella flexneri	Shigella	1	Escherichia/Shigella
2198967200	NZ_CP055181.1	Shigella flexneri strain STEFF_17	Shigella flexneri	Shigella	1	Escherichia/Shigella
2198967212	NZ_CP055099.1	Shigella flexneri strain SWHIN_107	Shigella flexneri	Shigella	1	Escherichia/Shigella
975003027	CP010829.1	Shigella sonnei strain FORC_011	Shigella sonnei	Shigella	1	Escherichia/Shigella
1348323427	CP014099.2	Shigella sonnei strain FDAARGOS_90	Shigella sonnei	Shigella	1	Escherichia/Shigella
1862789853	NZ_CP055292.1	Shigella sonnei strain SE6-1	Shigella sonnei	Shigella	1	Escherichia/Shigella
16802048	NC_003210.1	Listeria monocytogenes EGD-e	Listeria monocytogenes	Listeria	2	Listeria
85700163	NC_002973.6	Listeria monocytogenes serotype 4b str. F2365	Listeria monocytogenes	Listeria	2	Listeria
217963303	NC_011660.1	Listeria monocytogenes HCC23	Listeria monocytogenes	Listeria	2	Listeria
226222639	NC_012488.1	Listeria monocytogenes serotype 4b str. CLIP 80459	Listeria monocytogenes	Listeria	2	Listeria
284993440	NC_013768.1	Listeria monocytogenes 08-5923	Listeria monocytogenes	Listeria	2	Listeria
315111338	CM001046.1	Listeria monocytogenes FSL F2-208	Listeria monocytogenes	Listeria	2	Listeria
386006713	NC_017529.1	Listeria monocytogenes L99	Listeria monocytogenes	Listeria	2	Listeria
386025288	NC_017537.1	Listeria monocytogenes M7	Listeria monocytogenes	Listeria	2	Listeria
386042347	NC_017544.1	Listeria monocytogenes 10403S	Listeria monocytogenes	Listeria	2	Listeria
386045634	NC_017545.1	Listeria monocytogenes J0161	Listeria monocytogenes	Listeria	2	Listeria
386048930	NC_017546.1	Listeria monocytogenes FSL R2-561	Listeria monocytogenes	Listeria	2	Listeria
386052273	NC_017547.1	Listeria monocytogenes Finland 1998	Listeria monocytogenes	Listeria	2	Listeria
386730761	NC_017728.1	Listeria monocytogenes 07PF0776	Listeria monocytogenes	Listeria	2	Listeria
404279552	NC_018587.1	Listeria monocytogenes SLCC2755	Listeria monocytogenes	Listeria	2	Listeria
404282430	NC_018588.1	Listeria monocytogenes SLCC2372	Listeria monocytogenes	Listeria	2	Listeria
404285367	NC_018591.1	Listeria monocytogenes serotype 7 str. SLCC2482	Listeria monocytogenes	Listeria	2	Listeria
404406483	NC_018590.1	Listeria monocytogenes SLCC2376	Listeria monocytogenes	Listeria	2	Listeria
404409239	NC_018592.1	Listeria monocytogenes SLCC5850	Listeria monocytogenes	Listeria	2	Listeria
404412106	NC_018593.1	Listeria monocytogenes SLCC7179	Listeria monocytogenes	Listeria	2	Listeria
405748335	NC_018584.1	Listeria monocytogenes ATCC 19117	Listeria monocytogenes	Listeria	2	Listeria
405751204	NC_018585.1	Listeria monocytogenes SLCC2378	Listeria monocytogenes	Listeria	2	Listeria
405754079	NC_018586.1	Listeria monocytogenes SLCC2540	Listeria monocytogenes	Listeria	2	Listeria
405756987	NC_018589.1	Listeria monocytogenes SLCC2479	Listeria monocytogenes	Listeria	2	Listeria
406702775	NC_018642.1	Listeria monocytogenes L312	Listeria monocytogenes	Listeria	2	Listeria
422808344	NZ_CM001469.1	Listeria monocytogenes FSL J1-208	Listeria monocytogenes	Listeria	2	Listeria
424712850	NC_019556.1	Listeria monocytogenes serotype 4b str. LL195	Listeria monocytogenes	Listeria	2	Listeria
424821653	NZ_CM001159.1	Listeria monocytogenes str. Scott A	Listeria monocytogenes	Listeria	2	Listeria
441469547	HE999704.1	Listeria monocytogenes La111	Listeria monocytogenes	Listeria	2	Listeria
441472679	HE999705.1	Listeria monocytogenes N53-1	Listeria monocytogenes	Listeria	2	Listeria
525865813	NC_021823.1	Listeria monocytogenes	Listeria monocytogenes	Listeria	2	Listeria
525869762	NC_021824.1	Listeria monocytogenes	Listeria monocytogenes	Listeria	2	Listeria
525886094	NC_021826.1	Listeria monocytogenes	Listeria monocytogenes	Listeria	2	Listeria
525896797	NC_021827.1	Listeria monocytogenes	Listeria monocytogenes	Listeria	2	Listeria
525916939	NC_021837.1	Listeria monocytogenes	Listeria monocytogenes	Listeria	2	Listeria
525924641	NC_021838.1	Listeria monocytogenes	Listeria monocytogenes	Listeria	2	Listeria
525929673	NC_021839.1	Listeria monocytogenes	Listeria monocytogenes	Listeria	2	Listeria
525934212	NC_021840.1	Listeria monocytogenes	Listeria monocytogenes	Listeria	2	Listeria
550896179	NC_022568.1	Listeria monocytogenes EGD	Listeria monocytogenes	Listeria	2	Listeria
662858600	NC_013766.2	Listeria monocytogenes 08-5578	Listeria monocytogenes	Listeria	2	Listeria
749197255	NZ_CP010346.1	Listeria monocytogenes strain IZSAM_Lm_hs2008	Listeria monocytogenes	Listeria	2	Listeria
749295156	NZ_CP009897.1	Listeria monocytogenes strain NTSN	Listeria monocytogenes	Listeria	2	Listeria
749295158	NZ_CP007492.1	Listeria monocytogenes strain NE isolate dc0214	Listeria monocytogenes	Listeria	2	Listeria
749295167	NZ_CP007160.1	Listeria monocytogenes WSLC1001	Listeria monocytogenes	Listeria	2	Listeria
749295176	NZ_CP009258.1	Listeria monocytogenes strain Lm60	Listeria monocytogenes	Listeria	2	Listeria
749295178	NZ_CP007210.1	Listeria monocytogenes WSLC1042	Listeria monocytogenes	Listeria	2	Listeria
749295179	NZ_HG813247.1	Listeria monocytogenes R479a	Listeria monocytogenes	Listeria	2	Listeria
749295181	NZ_HG813249.1	Listeria monocytogenes 6179	Listeria monocytogenes	Listeria	2	Listeria
770815858	NZ_CP011004.1	Listeria monocytogenes strain N2306 isolate Human listeriosis	Listeria monocytogenes	Listeria	2	Listeria
820948644	NZ_CP011397.1	Listeria monocytogenes strain CFSAN007956	Listeria monocytogenes	Listeria	2	Listeria
844700338	NZ_CP007686.1	Listeria monocytogenes strain L2624	Listeria monocytogenes	Listeria	2	Listeria
844723009	NZ_CP007685.1	Listeria monocytogenes strain L2676	Listeria monocytogenes	Listeria	2	Listeria
844738098	NZ_CP007684.1	Listeria monocytogenes strain L2626	Listeria monocytogenes	Listeria	2	Listeria
844766283	NZ_CP007689.1	Listeria monocytogenes strain L2074	Listeria monocytogenes	Listeria	2	Listeria
844767881	NZ_CP007688.1	Listeria monocytogenes strain L1846	Listeria monocytogenes	Listeria	2	Listeria
844783865	NZ_CP007687.1	Listeria monocytogenes strain L2625	Listeria monocytogenes	Listeria	2	Listeria
915817002	NZ_CP009242.1	Listeria monocytogenes strain LM850658	Listeria monocytogenes	Listeria	2	Listeria
919996417	NZ_CM003382.1	Listeria monocytogenes strain JF5171	Listeria monocytogenes	Listeria	2	Listeria
959854639	NZ_CP013287.1	Listeria monocytogenes strain WSLC 1020	Listeria monocytogenes	Listeria	2	Listeria
971065745	NZ_CP013722.1	Listeria monocytogenes strain Lm 3163	Listeria monocytogenes	Listeria	2	Listeria
971066886	NZ_CP013723.1	Listeria monocytogenes strain Lm 3136	Listeria monocytogenes	Listeria	2	Listeria
971066912	NZ_CP013724.1	Listeria monocytogenes strain Lm N1546	Listeria monocytogenes	Listeria	2	Listeria
974624112	NZ_CP013919.1	Listeria monocytogenes strain IZSAM_Lm_15_17439_A144 isolate A144	Listeria monocytogenes	Listeria	2	Listeria
983377341	NZ_CP013289.1	Listeria monocytogenes strain WSLC 1047	Listeria monocytogenes	Listeria	2	Listeria
983399689	NZ_CP013285.1	Listeria monocytogenes strain WSLC 1018	Listeria monocytogenes	Listeria	2	Listeria
983399699	NZ_CP013286.1	Listeria monocytogenes strain WSLC 1019	Listeria monocytogenes	Listeria	2	Listeria
983415358	NZ_CP013288.1	Listeria monocytogenes ATCC 19117 strain WSLC 1033	Listeria monocytogenes	Listeria	2	Listeria
983523735	NC_021830.2	Listeria monocytogenes J1816	Listeria monocytogenes	Listeria	2	Listeria
987866210	NZ_CP014261.1	Listeria monocytogenes strain 2015TE19005-1355	Listeria monocytogenes	Listeria	2	Listeria
1009098695	NZ_CP014790.1	Listeria monocytogenes strain 2015TE24968	Listeria monocytogenes	Listeria	2	Listeria
1028866171	NZ_CP011345.1	Listeria monocytogenes strain FW040025	Listeria monocytogenes	Listeria	2	Listeria
1044696673	NZ_CP006858.1	Listeria monocytogenes serotype 1/2a str. 08-6569	Listeria monocytogenes	Listeria	2	Listeria
1044698190	NZ_CP006860.1	Listeria monocytogenes serotype 1/2a str. 10-0815	Listeria monocytogenes	Listeria	2	Listeria
1044698232	NZ_CP006862.1	Listeria monocytogenes serotype 1/2a str. 88-0478	Listeria monocytogenes	Listeria	2	Listeria
1044698260	NZ_CP006874.1	Listeria monocytogenes serotype 4b str. 81-0861	Listeria monocytogenes	Listeria	2	Listeria
1044698262	NZ_CP006859.1	Listeria monocytogenes serotype 1/2a str. 08-6997	Listeria monocytogenes	Listeria	2	Listeria
1044698273	NZ_CP006861.1	Listeria monocytogenes serotype 1/2a str. 10-1047	Listeria monocytogenes	Listeria	2	Listeria
1124158260	NZ_CP018685.1	Listeria monocytogenes strain HPB913	Listeria monocytogenes	Listeria	2	Listeria
1133535024	NZ_CP019165.1	Listeria monocytogenes strain HPB5415	Listeria monocytogenes	Listeria	2	Listeria
1133535026	NZ_CP019167.1	Listeria monocytogenes strain HPB5622	Listeria monocytogenes	Listeria	2	Listeria
1133548768	NZ_CP019170.1	Listeria monocytogenes strain CFSAN042079	Listeria monocytogenes	Listeria	2	Listeria
1133550634	NZ_CP019164.1	Listeria monocytogenes strain HPB2088	Listeria monocytogenes	Listeria	2	Listeria
1148539345	NZ_CP019621.1	Listeria monocytogenes strain 10-092876-1235 LM8	Listeria monocytogenes	Listeria	2	Listeria
1148577235	NZ_CP019614.1	Listeria monocytogenes strain 10-092876-1559 LM1	Listeria monocytogenes	Listeria	2	Listeria
1148577479	NZ_CP019617.1	Listeria monocytogenes strain 10-092876-0055 LM4	Listeria monocytogenes	Listeria	2	Listeria
1148656485	NZ_CP019616.1	Listeria monocytogenes strain 10-092876-1063 LM3	Listeria monocytogenes	Listeria	2	Listeria
1148656879	NZ_CP019622.1	Listeria monocytogenes strain 10-092876-0145 LM9	Listeria monocytogenes	Listeria	2	Listeria
1148657725	NZ_CP019624.1	Listeria monocytogenes strain 10-092876-1016 LM11	Listeria monocytogenes	Listeria	2	Listeria
1148657891	NZ_CP019625.1	Listeria monocytogenes strain 10-092876-0769 LM12	Listeria monocytogenes	Listeria	2	Listeria
1148699557	NZ_CP019620.1	Listeria monocytogenes strain 10-092876-1547 LM7	Listeria monocytogenes	Listeria	2	Listeria
1148888582	NZ_CP019623.1	Listeria monocytogenes strain 10-092876-1763 LM10	Listeria monocytogenes	Listeria	2	Listeria
1148897259	NZ_CP019618.1	Listeria monocytogenes strain 10-092876-0731 LM5	Listeria monocytogenes	Listeria	2	Listeria
1148900519	NZ_CP019619.1	Listeria monocytogenes strain 10-092876-1155 LM6	Listeria monocytogenes	Listeria	2	Listeria
1148936148	NZ_CP019615.1	Listeria monocytogenes strain 10-092876-0168	Listeria monocytogenes	Listeria	2	Listeria
1165780449	NZ_CP015593.1	Listeria monocytogenes strain ICDC-LM188	Listeria monocytogenes	Listeria	2	Listeria
1184507497	NZ_CP020774.1	Listeria monocytogenes strain H34	Listeria monocytogenes	Listeria	2	Listeria
1186131786	NZ_CP020832.1	Listeria monocytogenes strain PNUSAL000096	Listeria monocytogenes	Listeria	2	Listeria
1186178715	NZ_CP020828.1	Listeria monocytogenes strain CFSAN022990	Listeria monocytogenes	Listeria	2	Listeria
1186179675	NZ_CP020830.1	Listeria monocytogenes strain MOD1_LS152	Listeria monocytogenes	Listeria	2	Listeria
1186194337	NZ_CP020831.1	Listeria monocytogenes strain PNUSAL000144	Listeria monocytogenes	Listeria	2	Listeria
1186201252	NZ_CP020827.1	Listeria monocytogenes strain CFSAN028538	Listeria monocytogenes	Listeria	2	Listeria
1186204373	NZ_CP020833.1	Listeria monocytogenes strain CFSAN004330	Listeria monocytogenes	Listeria	2	Listeria
1189219582	NZ_CP007583.1	Listeria monocytogenes strain XYSN	Listeria monocytogenes	Listeria	2	Listeria
1211914611	NZ_CP022020.1	Listeria monocytogenes strain FDA709873-33	Listeria monocytogenes	Listeria	2	Listeria
1214097406	NZ_CP007008.1	Listeria monocytogenes serotype 1/2a str. 04-5457	Listeria monocytogenes	Listeria	2	Listeria
1214097408	NZ_CP007018.1	Listeria monocytogenes serotype 1/2a str. 10-1321	Listeria monocytogenes	Listeria	2	Listeria
1214099209	NZ_CP007195.1	Listeria monocytogenes serotype 1/2c str. 10-5026	Listeria monocytogenes	Listeria	2	Listeria
1214099400	NZ_CP007200.1	Listeria monocytogenes serotype 1/2a str. 10-0934	Listeria monocytogenes	Listeria	2	Listeria
1214099427	NZ_CP007462.1	Listeria monocytogenes serotype 4b str. 02-6680	Listeria monocytogenes	Listeria	2	Listeria
1214099434	NZ_CP007525.1	Listeria monocytogenes serotype 4b str. 81-0558	Listeria monocytogenes	Listeria	2	Listeria
1214115384	NZ_CP008821.1	Listeria monocytogenes serotype 4b str. 02-6679	Listeria monocytogenes	Listeria	2	Listeria
1214115871	NZ_CP007011.1	Listeria monocytogenes serotype 1/2a str. 08-7669	Listeria monocytogenes	Listeria	2	Listeria
1214115874	NZ_CP007021.1	Listeria monocytogenes serotype 1/2a str. 99-6370	Listeria monocytogenes	Listeria	2	Listeria
1214116446	NZ_CP007198.1	Listeria monocytogenes serotype 1/2a str. 10-4758	Listeria monocytogenes	Listeria	2	Listeria
1214116627	NZ_CP007460.1	Listeria monocytogenes serotype 4b str. 02-1289	Listeria monocytogenes	Listeria	2	Listeria
1214125980	NZ_CP007009.1	Listeria monocytogenes serotype 1/2a str. 08-6056	Listeria monocytogenes	Listeria	2	Listeria
1214126289	NZ_CP007010.1	Listeria monocytogenes serotype 1/2a str. 08-7374	Listeria monocytogenes	Listeria	2	Listeria
1214126293	NZ_CP007019.1	Listeria monocytogenes serotype 1/2a str. 95-0093	Listeria monocytogenes	Listeria	2	Listeria
1214126295	NZ_CP007020.1	Listeria monocytogenes serotype 1/2a str. 98-2035	Listeria monocytogenes	Listeria	2	Listeria
1214126607	NZ_CP007196.1	Listeria monocytogenes serotype 3c str. 10-5027	Listeria monocytogenes	Listeria	2	Listeria
1214126613	NZ_CP007197.1	Listeria monocytogenes serotype 1/2a str. 10-4754	Listeria monocytogenes	Listeria	2	Listeria
1214126870	NZ_CP007459.1	Listeria monocytogenes serotype 4b str. 02-1103	Listeria monocytogenes	Listeria	2	Listeria
1214126899	NZ_CP008837.1	Listeria monocytogenes serotype 1/2a str. 10-5024	Listeria monocytogenes	Listeria	2	Listeria
1214127699	NZ_CP007526.1	Listeria monocytogenes serotype 4b str. 81-0592	Listeria monocytogenes	Listeria	2	Listeria
1214135363	NZ_CP007007.1	Listeria monocytogenes serotype 1/2a str. 02-5993	Listeria monocytogenes	Listeria	2	Listeria
1214135398	NZ_CP007017.1	Listeria monocytogenes serotype 1/2a str. 10-1046	Listeria monocytogenes	Listeria	2	Listeria
1214135643	NZ_CP007194.1	Listeria monocytogenes serotype 1/2c str. 10-5025	Listeria monocytogenes	Listeria	2	Listeria
1214135646	NZ_CP007199.1	Listeria monocytogenes serotype 1/2a str. 10-0933	Listeria monocytogenes	Listeria	2	Listeria
1214136552	NZ_CP007461.1	Listeria monocytogenes serotype 4b str. 02-1792	Listeria monocytogenes	Listeria	2	Listeria
1214137216	NZ_CP008836.1	Listeria monocytogenes serotype 1/2a str. 10-0814	Listeria monocytogenes	Listeria	2	Listeria
1214422215	NZ_CP007168.1	Listeria monocytogenes serotype 1/2b str. 10-0810	Listeria monocytogenes	Listeria	2	Listeria
1214429779	NZ_CP007167.1	Listeria monocytogenes serotype 4b str. 10-0809	Listeria monocytogenes	Listeria	2	Listeria
1214429938	NZ_CP007170.1	Listeria monocytogenes serotype 1/2a str. 10-0812	Listeria monocytogenes	Listeria	2	Listeria
1214448514	NZ_CP007169.1	Listeria monocytogenes serotype 1/2b str. 10-0811	Listeria monocytogenes	Listeria	2	Listeria
1214448821	NZ_CP007171.1	Listeria monocytogenes serotype 1/2a str. 10-0813	Listeria monocytogenes	Listeria	2	Listeria
1216916006	NZ_CP016629.1	Listeria monocytogenes strain FORC_049	Listeria monocytogenes	Listeria	2	Listeria
1237037279	NZ_LT906436.1	Listeria monocytogenes strain NCTC10357	Listeria monocytogenes	Listeria	2	Listeria
1240330971	NZ_CP023052.1	Listeria monocytogenes strain FDA709873-31	Listeria monocytogenes	Listeria	2	Listeria
1240337535	NZ_CP023050.1	Listeria monocytogenes strain FDA971911-001-001	Listeria monocytogenes	Listeria	2	Listeria
1267354695	NZ_CP023752.1	Listeria monocytogenes strain AT3E	Listeria monocytogenes	Listeria	2	Listeria
1267369797	NZ_CP023754.1	Listeria monocytogenes strain AL4E	Listeria monocytogenes	Listeria	2	Listeria
1274278643	NZ_CP015508.1	Listeria monocytogenes strain F4244	Listeria monocytogenes	Listeria	2	Listeria
1306712963	NZ_CP025082.1	Listeria monocytogenes strain MF4626	Listeria monocytogenes	Listeria	2	Listeria
1316700361	NZ_CP025259.1	Listeria monocytogenes strain MF4624	Listeria monocytogenes	Listeria	2	Listeria
1326068981	NZ_CP025438.1	Listeria monocytogenes strain MF4697	Listeria monocytogenes	Listeria	2	Listeria
1326093147	NZ_CP025440.1	Listeria monocytogenes strain MF6172	Listeria monocytogenes	Listeria	2	Listeria
1326132931	NZ_CP025442.1	Listeria monocytogenes strain MF4562	Listeria monocytogenes	Listeria	2	Listeria
1326132939	NZ_CP025443.1	Listeria monocytogenes strain MF4545	Listeria monocytogenes	Listeria	2	Listeria
1355936694	NZ_LT985476.1	Listeria monocytogenes isolate LMNC088	Listeria monocytogenes	Listeria	2	Listeria
1355936781	NZ_LT985475.1	Listeria monocytogenes isolate JF5861	Listeria monocytogenes	Listeria	2	Listeria
1356020090	NZ_CP027029.1	Listeria monocytogenes strain Lm16	Listeria monocytogenes	Listeria	2	Listeria
1356065111	NZ_CP026043.1	Listeria monocytogenes strain FDAARGOS_58	Listeria monocytogenes	Listeria	2	Listeria
1356099077	NZ_LT985474.1	Listeria monocytogenes isolate JF5203_1	Listeria monocytogenes	Listeria	2	Listeria
1358004970	NZ_CP021325.1	Listeria monocytogenes strain NH1	Listeria monocytogenes	Listeria	2	Listeria
1374033493	NZ_CP028333.1	Listeria monocytogenes strain CFSAN054108	Listeria monocytogenes	Listeria	2	Listeria
1374138180	NZ_CP028183.1	Listeria monocytogenes strain CFSAN054109	Listeria monocytogenes	Listeria	2	Listeria
1376307125	NZ_CP025220.1	Listeria monocytogenes strain PIR00546	Listeria monocytogenes	Listeria	2	Listeria
1378705676	NZ_CP025568.1	Listeria monocytogenes strain PIR00540	Listeria monocytogenes	Listeria	2	Listeria
1378764710	NZ_CP025219.1	Listeria monocytogenes strain ATCC 13932	Listeria monocytogenes	Listeria	2	Listeria
1378834924	NZ_CP025567.1	Listeria monocytogenes strain ATCC 51779	Listeria monocytogenes	Listeria	2	Listeria
1378849020	NZ_CP025560.1	Listeria monocytogenes strain PIR00545	Listeria monocytogenes	Listeria	2	Listeria
1378910800	NZ_CP025221.1	Listeria monocytogenes strain PIR00543	Listeria monocytogenes	Listeria	2	Listeria
1378911601	NZ_CP025565.1	Listeria monocytogenes strain PIR00544	Listeria monocytogenes	Listeria	2	Listeria
1378911667	NZ_CP025222.1	Listeria monocytogenes strain ATCC 51775	Listeria monocytogenes	Listeria	2	Listeria
1381792218	NZ_CP028400.1	Listeria monocytogenes strain 2016TE340	Listeria monocytogenes	Listeria	2	Listeria
1381804765	NZ_CP028410.1	Listeria monocytogenes strain 2015TE17781-7	Listeria monocytogenes	Listeria	2	Listeria
1381811533	NZ_CP028405.1	Listeria monocytogenes strain 2015TE24980	Listeria monocytogenes	Listeria	2	Listeria
1381819483	NZ_CP028412.1	Listeria monocytogenes strain 2015TE17781-5	Listeria monocytogenes	Listeria	2	Listeria
1381828078	NZ_CP028396.1	Listeria monocytogenes strain 2016TE3773-1-1	Listeria monocytogenes	Listeria	2	Listeria
1381829106	NZ_CP028395.1	Listeria monocytogenes strain 2016TE4526-1-1	Listeria monocytogenes	Listeria	2	Listeria
1381846338	NZ_CP028409.1	Listeria monocytogenes strain 2015TE17781-8	Listeria monocytogenes	Listeria	2	Listeria
1381848035	NZ_CP028411.1	Listeria monocytogenes strain 2015TE17781-6	Listeria monocytogenes	Listeria	2	Listeria
1381849484	NZ_CP028399.1	Listeria monocytogenes strain 2016TE3765-1-1	Listeria monocytogenes	Listeria	2	Listeria
1381860504	NZ_CP028403.1	Listeria monocytogenes strain 2016TE1560	Listeria monocytogenes	Listeria	2	Listeria
1381864368	NZ_CP028392.1	Listeria monocytogenes strain 2016TE2013	Listeria monocytogenes	Listeria	2	Listeria
1381875548	NZ_CP028393.1	Listeria monocytogenes strain 2016TE840-1-1	Listeria monocytogenes	Listeria	2	Listeria
1381875634	NZ_CP028401.1	Listeria monocytogenes strain 2016TE337	Listeria monocytogenes	Listeria	2	Listeria
1381881814	NZ_CP028402.1	Listeria monocytogenes strain 2016TE2143	Listeria monocytogenes	Listeria	2	Listeria
1381882794	NZ_CP028407.1	Listeria monocytogenes strain 2015TE22590	Listeria monocytogenes	Listeria	2	Listeria
1381885993	NZ_CP028404.1	Listeria monocytogenes strain 2015TE34286	Listeria monocytogenes	Listeria	2	Listeria
1381901308	NZ_CP028408.1	Listeria monocytogenes strain 2015TE17781-9	Listeria monocytogenes	Listeria	2	Listeria
1381904254	NZ_CP028394.1	Listeria monocytogenes strain 2016TE4965-1-1	Listeria monocytogenes	Listeria	2	Listeria
1381915590	NZ_CP028413.1	Listeria monocytogenes strain 2015TE17781-3	Listeria monocytogenes	Listeria	2	Listeria
1381916460	NZ_CP028398.1	Listeria monocytogenes strain 2016TE3767-1-1	Listeria monocytogenes	Listeria	2	Listeria
1381918104	NZ_CP028406.1	Listeria monocytogenes strain 2015TE24968	Listeria monocytogenes	Listeria	2	Listeria
1381930583	NZ_CP028397.1	Listeria monocytogenes strain 2016TE3770-1-1	Listeria monocytogenes	Listeria	2	Listeria
1390999628	NZ_CP011398.2	Listeria monocytogenes strain CFSAN008100	Listeria monocytogenes	Listeria	2	Listeria
1391544521	NZ_CP029372.1	Listeria monocytogenes strain 2018TE5305-1-4	Listeria monocytogenes	Listeria	2	Listeria
1449830612	NZ_CP031476.1	Listeria monocytogenes strain M13455	Listeria monocytogenes	Listeria	2	Listeria
1463939081	NZ_CP031674.1	Listeria monocytogenes strain CIIMS-NV-3	Listeria monocytogenes	Listeria	2	Listeria
1468490721	NZ_CP023321.1	Listeria monocytogenes strain CIIMS-PH-1	Listeria monocytogenes	Listeria	2	Listeria
1468494275	NZ_CP008768.1	Listeria monocytogenes serotype 1/2a str. 10-0819	Listeria monocytogenes	Listeria	2	Listeria
1468497432	NZ_CP008770.1	Listeria monocytogenes serotype 3a str. 88-1059	Listeria monocytogenes	Listeria	2	Listeria
1514780640	NZ_CP033612.1	Listeria monocytogenes strain LMJF5203	Listeria monocytogenes	Listeria	2	Listeria
1520179989	NZ_CP033737.1	Listeria monocytogenes strain FDAARGOS_555	Listeria monocytogenes	Listeria	2	Listeria
1520181369	NZ_CP033738.1	Listeria monocytogenes strain FDAARGOS_554	Listeria monocytogenes	Listeria	2	Listeria
1543658183	NZ_CP020022.1	Listeria monocytogenes strain LI0521	Listeria monocytogenes	Listeria	2	Listeria
1545164198	NZ_LR134397.1	Listeria monocytogenes strain NCTC7973	Listeria monocytogenes	Listeria	2	Listeria
1552978883	NZ_CP021174.1	Listeria monocytogenes strain FORC_057	Listeria monocytogenes	Listeria	2	Listeria
1561229351	NZ_CP035187.1	Listeria monocytogenes strain N16-0044	Listeria monocytogenes	Listeria	2	Listeria
1614096907	NZ_CP038642.1	Listeria monocytogenes strain N12-0935	Listeria monocytogenes	Listeria	2	Listeria
1615133236	NZ_CP031141.1	Listeria monocytogenes strain NCCP 14714	Listeria monocytogenes	Listeria	2	Listeria
1615154806	NZ_CP029175.1	Listeria monocytogenes strain NCCP 15743	Listeria monocytogenes	Listeria	2	Listeria
1634522795	NZ_CP039751.1	Listeria monocytogenes strain Li 2108	Listeria monocytogenes	Listeria	2	Listeria
1692875316	NZ_CP041014.1	Listeria monocytogenes strain FDAARGOS_607	Listeria monocytogenes	Listeria	2	Listeria
1692876744	NZ_CP040988.1	Listeria monocytogenes strain FDAARGOS_778	Listeria monocytogenes	Listeria	2	Listeria
1705136158	NZ_CP041211.1	Listeria monocytogenes strain LMP18-H2446	Listeria monocytogenes	Listeria	2	Listeria
1705153848	NZ_CP041213.1	Listeria monocytogenes strain LMP18-H8393	Listeria monocytogenes	Listeria	2	Listeria
1727804783	NZ_LR698978.1	Listeria monocytogenes isolate MGYG-HGUT-02325	Listeria monocytogenes	Listeria	2	Listeria
1757118445	NZ_CP032668.1	Listeria monocytogenes strain 52873	Listeria monocytogenes	Listeria	2	Listeria
1757119592	NZ_CP032673.1	Listeria monocytogenes strain 52330	Listeria monocytogenes	Listeria	2	Listeria
1757221849	NZ_CP032670.1	Listeria monocytogenes strain 52860	Listeria monocytogenes	Listeria	2	Listeria
1757223915	NZ_CP032671.1	Listeria monocytogenes strain 52859	Listeria monocytogenes	Listeria	2	Listeria
1757234338	NZ_CP032669.1	Listeria monocytogenes strain 52869	Listeria monocytogenes	Listeria	2	Listeria
1757285534	NZ_CP032672.1	Listeria monocytogenes strain 52854	Listeria monocytogenes	Listeria	2	Listeria
1759501819	NZ_CP030806.1	Listeria monocytogenes strain 16	Listeria monocytogenes	Listeria	2	Listeria
1759504491	NZ_CP030804.1	Listeria monocytogenes strain 18	Listeria monocytogenes	Listeria	2	Listeria
1759504891	NZ_CP030803.1	Listeria monocytogenes strain 20	Listeria monocytogenes	Listeria	2	Listeria
1759505289	NZ_CP030812.1	Listeria monocytogenes strain 9	Listeria monocytogenes	Listeria	2	Listeria
1759505579	NZ_CP030807.1	Listeria monocytogenes strain 15	Listeria monocytogenes	Listeria	2	Listeria
1759505733	NZ_CP030811.1	Listeria monocytogenes strain 10	Listeria monocytogenes	Listeria	2	Listeria
1759509025	NZ_CP030835.1	Listeria monocytogenes strain 7	Listeria monocytogenes	Listeria	2	Listeria
1759513971	NZ_CP030805.1	Listeria monocytogenes strain 17	Listeria monocytogenes	Listeria	2	Listeria
1759515328	NZ_CP030809.1	Listeria monocytogenes strain 13	Listeria monocytogenes	Listeria	2	Listeria
1759517052	NZ_CP030813.1	Listeria monocytogenes strain 1	Listeria monocytogenes	Listeria	2	Listeria
1759518556	NZ_CP030810.1	Listeria monocytogenes strain 11	Listeria monocytogenes	Listeria	2	Listeria
1759523042	NZ_CP030834.1	Listeria monocytogenes strain 12	Listeria monocytogenes	Listeria	2	Listeria
1759523981	NZ_CP030836.1	Listeria monocytogenes strain 6	Listeria monocytogenes	Listeria	2	Listeria
1759527018	NZ_CP030808.1	Listeria monocytogenes strain 14	Listeria monocytogenes	Listeria	2	Listeria
1759542063	NZ_CP030837.1	Listeria monocytogenes strain 4	Listeria monocytogenes	Listeria	2	Listeria
1759612946	NZ_CP044429.1	Listeria monocytogenes serotype 4b str. LIS0087	Listeria monocytogenes	Listeria	2	Listeria
1774819274	NZ_CP045745.1	Listeria monocytogenes strain CFSAN023469	Listeria monocytogenes	Listeria	2	Listeria
1774819728	NZ_CP045748.1	Listeria monocytogenes strain CFSAN023464	Listeria monocytogenes	Listeria	2	Listeria
1774820063	NZ_CP045749.1	Listeria monocytogenes strain CFSAN008100	Listeria monocytogenes	Listeria	2	Listeria
1774833462	NZ_CP045747.1	Listeria monocytogenes strain CFSAN023465	Listeria monocytogenes	Listeria	2	Listeria
1774855574	NZ_CP045751.1	Listeria monocytogenes CFSAN002349	Listeria monocytogenes	Listeria	2	Listeria
1774861840	NZ_CP045746.1	Listeria monocytogenes strain CFSAN023468	Listeria monocytogenes	Listeria	2	Listeria
1776843806	NZ_CP045969.1	Listeria monocytogenes strain AUSMDU00007774	Listeria monocytogenes	Listeria	2	Listeria
1776848616	NZ_CP045970.1	Listeria monocytogenes strain AUSMDU00000235	Listeria monocytogenes	Listeria	2	Listeria
1776848798	NZ_CP045972.1	Listeria monocytogenes strain AUSMDU00000224	Listeria monocytogenes	Listeria	2	Listeria
1782296945	NZ_CP046361.1	Listeria monocytogenes strain N843_10	Listeria monocytogenes	Listeria	2	Listeria
1782445710	NZ_CP046362.1	Listeria monocytogenes strain N843_15	Listeria monocytogenes	Listeria	2	Listeria
1797947222	NZ_CP023861.1	Listeria monocytogenes EGD-e	Listeria monocytogenes	Listeria	2	Listeria
1797947313	NZ_CP023862.1	Listeria monocytogenes strain ScottA	Listeria monocytogenes	Listeria	2	Listeria
1802805320	NC_021829.4	Listeria monocytogenes J1-220	Listeria monocytogenes	Listeria	2	Listeria
1816690334	NZ_CP048400.1	Listeria monocytogenes strain AUF	Listeria monocytogenes	Listeria	2	Listeria
1816691372	NZ_CP048401.1	Listeria monocytogenes strain 4/52-1953	Listeria monocytogenes	Listeria	2	Listeria
1844007672	NZ_CP053357.1	Listeria monocytogenes strain 2017-TE-6913-1	Listeria monocytogenes	Listeria	2	Listeria
1844502259	NZ_CP053478.1	Listeria monocytogenes strain OB020621	Listeria monocytogenes	Listeria	2	Listeria
1846259967	NZ_CP053632.1	Listeria monocytogenes strain OB050226	Listeria monocytogenes	Listeria	2	Listeria
1846265912	NZ_CP053628.1	Listeria monocytogenes strain OB030029	Listeria monocytogenes	Listeria	2	Listeria
1846278217	NZ_CP053630.1	Listeria monocytogenes strain OB040119	Listeria monocytogenes	Listeria	2	Listeria
1850689193	NZ_CP054039.1	Listeria monocytogenes strain PNUSAL001122	Listeria monocytogenes	Listeria	2	Listeria
1850689937	NZ_CP054042.1	Listeria monocytogenes strain PNUSAL000009	Listeria monocytogenes	Listeria	2	Listeria
1850689953	NZ_CP054041.1	Listeria monocytogenes strain F6212	Listeria monocytogenes	Listeria	2	Listeria
1850691520	NZ_CP054040.1	Listeria monocytogenes strain PNUSAL000019	Listeria monocytogenes	Listeria	2	Listeria
1859914722	CP054846.1	Listeria monocytogenes strain BfR-LI-00752	Listeria monocytogenes	Listeria	2	Listeria
1865114527	NZ_CP058256.1	Listeria monocytogenes strain HM00113468	Listeria monocytogenes	Listeria	2	Listeria
1897073874	NZ_CP060430.1	Listeria monocytogenes strain 3453	Listeria monocytogenes	Listeria	2	Listeria
1897074526	NZ_CP060435.1	Listeria monocytogenes strain GIMC2009:LmcUH4	Listeria monocytogenes	Listeria	2	Listeria
1897075257	NZ_CP060432.1	Listeria monocytogenes strain GIMC2016:Lmc547	Listeria monocytogenes	Listeria	2	Listeria
1897080119	NZ_CP060433.1	Listeria monocytogenes strain GIMC2015:Lmc22	Listeria monocytogenes	Listeria	2	Listeria
1897080122	NZ_CP060434.1	Listeria monocytogenes strain GIMC2010:LmcUH8	Listeria monocytogenes	Listeria	2	Listeria
1897084322	NZ_CP060429.1	Listeria monocytogenes strain 24618	Listeria monocytogenes	Listeria	2	Listeria
1897085791	NZ_CP060431.1	Listeria monocytogenes strain 134	Listeria monocytogenes	Listeria	2	Listeria
1897675538	NZ_CP060526.1	Listeria monocytogenes strain OB080183	Listeria monocytogenes	Listeria	2	Listeria
1914236482	NZ_CP062124.1	Listeria monocytogenes strain FSL R9-0915	Listeria monocytogenes	Listeria	2	Listeria
1914236487	NZ_CP062126.1	Listeria monocytogenes strain FSL F6-0367	Listeria monocytogenes	Listeria	2	Listeria
1914249764	NZ_CP062129.1	Listeria monocytogenes FSL J1-175	Listeria monocytogenes	Listeria	2	Listeria
1914298722	NZ_CP062127.1	Listeria monocytogenes FSL J1-208	Listeria monocytogenes	Listeria	2	Listeria
1920034713	NZ_CP063240.1	Listeria monocytogenes strain 19-05816	Listeria monocytogenes	Listeria	2	Listeria
1920035492	NZ_CP063381.1	Listeria monocytogenes strain clinical isolate of L. monocytogenes isolate 12-05460	Listeria monocytogenes	Listeria	2	Listeria
1920037039	NZ_CP063383.1	Listeria monocytogenes strain clinical isolate of L. monocytogenes isolate 18-04540	Listeria monocytogenes	Listeria	2	Listeria
1920123263	NZ_CP063382.1	Listeria monocytogenes strain clinical isolate of L. monocytogenes isolate 15-01121	Listeria monocytogenes	Listeria	2	Listeria
1934634714	NZ_CP064843.1	Listeria monocytogenes strain clinical isolate of L. monocytogenes isolate 18-04415	Listeria monocytogenes	Listeria	2	Listeria
1941016305	NZ_CP065028.1	Listeria monocytogenes strain UKVDL9	Listeria monocytogenes	Listeria	2	Listeria
1960077403	NZ_CP068150.1	Listeria monocytogenes strain FDAARGOS_1080	Listeria monocytogenes	Listeria	2	Listeria
1966495833	NZ_CP068392.1	Listeria monocytogenes strain LM26	Listeria monocytogenes	Listeria	2	Listeria
1969226486	NZ_CP067362.1	Listeria monocytogenes strain LM18	Listeria monocytogenes	Listeria	2	Listeria
1969927995	NZ_CP068601.1	Listeria monocytogenes strain LM43	Listeria monocytogenes	Listeria	2	Listeria
1969972616	NZ_CP068600.1	Listeria monocytogenes strain LM39	Listeria monocytogenes	Listeria	2	Listeria
1970145250	NZ_CP068599.1	Listeria monocytogenes strain LM36	Listeria monocytogenes	Listeria	2	Listeria
1981124127	NZ_CP046478.1	Listeria monocytogenes strain LM928	Listeria monocytogenes	Listeria	2	Listeria
1993118052	NZ_LR999861.1	Listeria monocytogenes isolate QI0054	Listeria monocytogenes	Listeria	2	Listeria
1993118110	NZ_LR999860.1	Listeria monocytogenes isolate QI0055	Listeria monocytogenes	Listeria	2	Listeria
1995201168	NZ_CP018149.2	Listeria monocytogenes strain VIMHA007	Listeria monocytogenes	Listeria	2	Listeria
2020353867	NZ_CP008765.1	Listeria monocytogenes serotype 1/2a str. 08-7362	Listeria monocytogenes	Listeria	2	Listeria
2020354361	NZ_CP008769.1	Listeria monocytogenes serotype 1/2a str. 11-4254	Listeria monocytogenes	Listeria	2	Listeria
2020392853	NZ_CP007538.1	Listeria monocytogenes serotype 1/2a str. 01-5252	Listeria monocytogenes	Listeria	2	Listeria
2020392907	NZ_CP007527.1	Listeria monocytogenes serotype 1/2a str. 01-1468	Listeria monocytogenes	Listeria	2	Listeria
2020393399	NZ_CP008703.1	Listeria monocytogenes serotype 1/2a str. 01-6771	Listeria monocytogenes	Listeria	2	Listeria
2020401323	NZ_CP008766.1	Listeria monocytogenes serotype 1/2a str. 08-7363	Listeria monocytogenes	Listeria	2	Listeria
2020422330	NZ_CP008773.1	Listeria monocytogenes serotype 1/2a str. 03-5473	Listeria monocytogenes	Listeria	2	Listeria
2020422882	NZ_CP008771.1	Listeria monocytogenes serotype 1/2a str. 98-0291	Listeria monocytogenes	Listeria	2	Listeria
2021309047	NZ_CP006940.1	Listeria monocytogenes serotype 1/2a str. 01-1280	Listeria monocytogenes	Listeria	2	Listeria
2021328230	NZ_CP030870.1	Listeria monocytogenes strain 8	Listeria monocytogenes	Listeria	2	Listeria
2021338765	NZ_CP008767.1	Listeria monocytogenes serotype 1/2a str. 08-7364	Listeria monocytogenes	Listeria	2	Listeria
2021339649	NZ_CP008772.1	Listeria monocytogenes serotype 1/2a str. 99-6871	Listeria monocytogenes	Listeria	2	Listeria
2028917904	NZ_CP071154.1	Listeria monocytogenes strain LR8	Listeria monocytogenes	Listeria	2	Listeria
2030376034	NZ_CP018148.2	Listeria monocytogenes strain VIMVR081	Listeria monocytogenes	Listeria	2	Listeria
2032408926	CP025201.1	Listeria monocytogenes strain Rev2	Listeria monocytogenes	Listeria	2	Listeria
2035531088	NZ_CP074104.1	Listeria monocytogenes strain LM30	Listeria monocytogenes	Listeria	2	Listeria
2037181959	NZ_CP050030.1	Listeria monocytogenes strain MB4	Listeria monocytogenes	Listeria	2	Listeria
2037181983	NZ_CP050024.1	Listeria monocytogenes strain S10	Listeria monocytogenes	Listeria	2	Listeria
2037193407	NZ_CP050029.1	Listeria monocytogenes strain CH3K-	Listeria monocytogenes	Listeria	2	Listeria
2037193597	NZ_CP050027.1	Listeria monocytogenes strain 1BR16	Listeria monocytogenes	Listeria	2	Listeria
2037193622	NZ_CP050025.1	Listeria monocytogenes strain S8	Listeria monocytogenes	Listeria	2	Listeria
2037193629	NZ_CP050129.1	Listeria monocytogenes strain MB2	Listeria monocytogenes	Listeria	2	Listeria
2037202232	NZ_CP050028.1	Listeria monocytogenes strain C3	Listeria monocytogenes	Listeria	2	Listeria
2037202236	NZ_CP050026.1	Listeria monocytogenes strain MB5	Listeria monocytogenes	Listeria	2	Listeria
2037207305	NZ_CP050023.1	Listeria monocytogenes strain S12	Listeria monocytogenes	Listeria	2	Listeria
2047299624	NZ_CP075874.1	Listeria monocytogenes strain 1BR5	Listeria monocytogenes	Listeria	2	Listeria
2047301215	NZ_CP075875.1	Listeria monocytogenes strain 2BR25	Listeria monocytogenes	Listeria	2	Listeria
2047301221	NZ_CP075878.1	Listeria monocytogenes strain 2HF33	Listeria monocytogenes	Listeria	2	Listeria
2047301227	NZ_CP075872.1	Listeria monocytogenes strain C7	Listeria monocytogenes	Listeria	2	Listeria
2047301239	NZ_CP075873.1	Listeria monocytogenes strain 2BR21	Listeria monocytogenes	Listeria	2	Listeria
2047313346	NZ_CP075871.1	Listeria monocytogenes strain 3BS29	Listeria monocytogenes	Listeria	2	Listeria
2047313377	NZ_CP075877.1	Listeria monocytogenes strain 2HF15	Listeria monocytogenes	Listeria	2	Listeria
2047314009	NZ_CP075876.1	Listeria monocytogenes strain 3BS28	Listeria monocytogenes	Listeria	2	Listeria
2048720852	NZ_CP076051.1	Listeria monocytogenes strain 3BS90	Listeria monocytogenes	Listeria	2	Listeria
2050132039	NZ_CP076127.1	Listeria monocytogenes strain LM25	Listeria monocytogenes	Listeria	2	Listeria
2050180419	NZ_CP076125.1	Listeria monocytogenes strain LM4	Listeria monocytogenes	Listeria	2	Listeria
2050188598	NZ_CP076126.1	Listeria monocytogenes strain LM20	Listeria monocytogenes	Listeria	2	Listeria
2051284848	NZ_CP076375.1	Listeria monocytogenes strain Colony47	Listeria monocytogenes	Listeria	2	Listeria
2056555899	NZ_CP076644.1	Listeria monocytogenes strain UKVDL4	Listeria monocytogenes	Listeria	2	Listeria
2056568963	NZ_CP076626.1	Listeria monocytogenes strain LM42	Listeria monocytogenes	Listeria	2	Listeria
2056578055	NZ_CP076669.1	Listeria monocytogenes strain UKVDL7	Listeria monocytogenes	Listeria	2	Listeria
2073343751	NZ_CP076625.1	Listeria monocytogenes strain LM7	Listeria monocytogenes	Listeria	2	Listeria
2082515123	NZ_CP007600.2	Listeria monocytogenes strain CFSAN006122	Listeria monocytogenes	Listeria	2	Listeria
2082515560	NZ_CP016213.2	Listeria monocytogenes strain CFSAN029793	Listeria monocytogenes	Listeria	2	Listeria
2082516417	NZ_CP012021.2	Listeria monocytogenes strain CFSAN023463	Listeria monocytogenes	Listeria	2	Listeria
2082516422	NC_021825.2	Listeria monocytogenes	Listeria monocytogenes	Listeria	2	Listeria
2082517138	NZ_CP014252.2	Listeria monocytogenes strain CFSAN023459	Listeria monocytogenes	Listeria	2	Listeria
2082517140	NZ_CP014250.2	Listeria monocytogenes strain CFSAN010068 isolate MD3882	Listeria monocytogenes	Listeria	2	Listeria
2174403007	NZ_CP061814.1	Listeria monocytogenes LO28	Listeria monocytogenes	Listeria	2	Listeria
2175500497	NZ_CP090052.1	Listeria monocytogenes strain FSL-N1-304	Listeria monocytogenes	Listeria	2	Listeria
2175502772	NZ_CP090057.1	Listeria monocytogenes strain FSL-J1-158	Listeria monocytogenes	Listeria	2	Listeria
2176768889	NZ_CP090054.1	Listeria monocytogenes strain FSL-N1-334	Listeria monocytogenes	Listeria	2	Listeria
2194659681	NZ_CP092059.1	Listeria monocytogenes strain GTA-L356	Listeria monocytogenes	Listeria	2	Listeria
2194661858	NZ_CP092057.1	Listeria monocytogenes strain GTA-L409	Listeria monocytogenes	Listeria	2	Listeria
2194663062	NZ_CP092060.1	Listeria monocytogenes strain GTA-L258	Listeria monocytogenes	Listeria	2	Listeria
2194664745	NZ_CP092056.1	Listeria monocytogenes strain GTA-L411	Listeria monocytogenes	Listeria	2	Listeria
2194664801	NZ_CP092061.1	Listeria monocytogenes strain GTA-L201	Listeria monocytogenes	Listeria	2	Listeria
2194664824	NZ_CP092058.1	Listeria monocytogenes strain GTA-L407	Listeria monocytogenes	Listeria	2	Listeria
15600771	NC_002506.1	Vibrio cholerae O1 biovar El Tor str. N16961	Vibrio cholerae	Vibrio	3	Vibrio1
15640032	NC_002505.1	Vibrio cholerae O1 biovar El Tor str. N16961	Vibrio cholerae	Vibrio	3	Vibrio1
147671401	NC_009456.1	Vibrio cholerae O395	Vibrio cholerae	Vibrio	3	Vibrio1
147673035	NC_009457.1	Vibrio cholerae O395	Vibrio cholerae	Vibrio	3	Vibrio1
227080237	NC_012578.1	Vibrio cholerae M66-2	Vibrio cholerae	Vibrio	3	Vibrio1
227116370	NC_012582.1	Vibrio cholerae O395	Vibrio cholerae	Vibrio	3	Vibrio1
227119188	NC_012583.1	Vibrio cholerae O395	Vibrio cholerae	Vibrio	3	Vibrio1
227811634	NC_012580.1	Vibrio cholerae M66-2	Vibrio cholerae	Vibrio	3	Vibrio1
229605062	NC_012667.1	Vibrio cholerae MJ-1236	Vibrio cholerae	Vibrio	3	Vibrio1
229606122	NC_012668.1	Vibrio cholerae MJ-1236	Vibrio cholerae	Vibrio	3	Vibrio1
327482915	CP002555.1	Vibrio cholerae LMA3894-4	Vibrio cholerae	Vibrio	3	Vibrio1
360034408	NC_016445.1	Vibrio cholerae O1 str. 2010EL-1786	Vibrio cholerae	Vibrio	3	Vibrio1
360037214	NC_016446.1	Vibrio cholerae O1 str. 2010EL-1786	Vibrio cholerae	Vibrio	3	Vibrio1
379739908	NC_016944.1	Vibrio cholerae IEC224	Vibrio cholerae	Vibrio	3	Vibrio1
379743460	NC_016945.1	Vibrio cholerae IEC224	Vibrio cholerae	Vibrio	3	Vibrio1
449053971	NZ_CM001785.1	Vibrio cholerae O1 str. Inaba G4222	Vibrio cholerae	Vibrio	3	Vibrio1
449057232	NZ_CM001786.1	Vibrio cholerae O1 str. Inaba G4222	Vibrio cholerae	Vibrio	3	Vibrio1
452722814	NZ_AKGH01000001.1	Vibrio cholerae H1	Vibrio cholerae	Vibrio	3	Vibrio1
452722815	NZ_AKGH01000002.1	Vibrio cholerae H1	Vibrio cholerae	Vibrio	3	Vibrio1
749014956	NZ_CM003111.1	Vibrio cholerae O1 biovar El Tor strain I-1471	Vibrio cholerae	Vibrio	3	Vibrio1
749015025	NZ_CM003112.1	Vibrio cholerae O1 biovar El Tor strain I-1471	Vibrio cholerae	Vibrio	3	Vibrio1
749293670	NZ_CP007634.1	Vibrio cholerae strain 2012EL-2176	Vibrio cholerae	Vibrio	3	Vibrio1
749293683	NZ_CP007635.1	Vibrio cholerae strain 2012EL-2176	Vibrio cholerae	Vibrio	3	Vibrio1
751581975	NZ_AP014524.1	Vibrio cholerae MS6	Vibrio cholerae	Vibrio	3	Vibrio1
751583904	NZ_AP014525.1	Vibrio cholerae MS6	Vibrio cholerae	Vibrio	3	Vibrio1
796467065	NZ_CP009041.1	Vibrio cholerae O1 biovar El Tor strain FJ147	Vibrio cholerae	Vibrio	3	Vibrio1
796471733	NZ_CP009042.1	Vibrio cholerae O1 biovar El Tor strain FJ147	Vibrio cholerae	Vibrio	3	Vibrio1
806407376	NZ_CP010811.1	Vibrio cholerae strain 1154-74	Vibrio cholerae	Vibrio	3	Vibrio1
806464118	NZ_CP010812.1	Vibrio cholerae strain 10432-62	Vibrio cholerae	Vibrio	3	Vibrio1
861210305	CP007653.1	Vibrio cholerae strain TSY216	Vibrio cholerae	Vibrio	3	Vibrio1
861213011	CP007654.1	Vibrio cholerae strain TSY216	Vibrio cholerae	Vibrio	3	Vibrio1
951140427	NZ_CP006947.1	Vibrio cholerae O1 str. KW3	Vibrio cholerae	Vibrio	3	Vibrio1
951140428	NZ_CP006948.1	Vibrio cholerae O1 str. KW3	Vibrio cholerae	Vibrio	3	Vibrio1
1043351791	NZ_CP016324.1	Vibrio cholerae 2740-80	Vibrio cholerae	Vibrio	3	Vibrio1
1043351792	NZ_CP016325.1	Vibrio cholerae 2740-80	Vibrio cholerae	Vibrio	3	Vibrio1
1093962572	NZ_CP012997.1	Vibrio cholerae strain 2012Env-9	Vibrio cholerae	Vibrio	3	Vibrio1
1093962573	NZ_CP012998.1	Vibrio cholerae strain 2012Env-9	Vibrio cholerae	Vibrio	3	Vibrio1
1093982095	NZ_CP013013.1	Vibrio cholerae strain Env-390	Vibrio cholerae	Vibrio	3	Vibrio1
1093982252	NZ_CP013014.1	Vibrio cholerae strain Env-390	Vibrio cholerae	Vibrio	3	Vibrio1
1110682061	NZ_CP013303.1	Vibrio cholerae strain CRC711	Vibrio cholerae	Vibrio	3	Vibrio1
1110682118	NZ_CP013304.1	Vibrio cholerae strain CRC711	Vibrio cholerae	Vibrio	3	Vibrio1
1110691602	NZ_CP013313.1	Vibrio cholerae strain E9120	Vibrio cholerae	Vibrio	3	Vibrio1
1110691603	NZ_CP013314.1	Vibrio cholerae strain E9120	Vibrio cholerae	Vibrio	3	Vibrio1
1110693308	NZ_CP013305.1	Vibrio cholerae strain CRC1106	Vibrio cholerae	Vibrio	3	Vibrio1
1110693309	NZ_CP013306.1	Vibrio cholerae strain CRC1106	Vibrio cholerae	Vibrio	3	Vibrio1
1110693379	NZ_CP013311.1	Vibrio cholerae strain E1320	Vibrio cholerae	Vibrio	3	Vibrio1
1110693380	NZ_CP013312.1	Vibrio cholerae strain E1320	Vibrio cholerae	Vibrio	3	Vibrio1
1110693395	NZ_CP013317.1	Vibrio cholerae strain NCTC5395	Vibrio cholerae	Vibrio	3	Vibrio1
1110693396	NZ_CP013318.1	Vibrio cholerae strain NCTC5395	Vibrio cholerae	Vibrio	3	Vibrio1
1110693630	NZ_CP013319.1	Vibrio cholerae strain NCTC9420	Vibrio cholerae	Vibrio	3	Vibrio1
1110693631	NZ_CP013320.1	Vibrio cholerae strain NCTC9420	Vibrio cholerae	Vibrio	3	Vibrio1
1110693653	NZ_CP013315.1	Vibrio cholerae strain M2140	Vibrio cholerae	Vibrio	3	Vibrio1
1110693654	NZ_CP013316.1	Vibrio cholerae strain M2140	Vibrio cholerae	Vibrio	3	Vibrio1
1110695808	NZ_CP013301.1	Vibrio cholerae strain C5	Vibrio cholerae	Vibrio	3	Vibrio1
1110695809	NZ_CP013302.1	Vibrio cholerae strain C5	Vibrio cholerae	Vibrio	3	Vibrio1
1110695814	NZ_CP013309.1	Vibrio cholerae strain E1162	Vibrio cholerae	Vibrio	3	Vibrio1
1110695815	NZ_CP013310.1	Vibrio cholerae strain E1162	Vibrio cholerae	Vibrio	3	Vibrio1
1169181357	NZ_CP013307.1	Vibrio cholerae strain E506	Vibrio cholerae	Vibrio	3	Vibrio1
1169181358	NZ_CP013308.1	Vibrio cholerae strain E506	Vibrio cholerae	Vibrio	3	Vibrio1
1244528568	NZ_CP012666.1	Vibrio cholerae strain ICDC-VC661	Vibrio cholerae	Vibrio	3	Vibrio1
1244528569	NZ_CP012667.1	Vibrio cholerae strain ICDC-VC661	Vibrio cholerae	Vibrio	3	Vibrio1
1244531528	NZ_CP016987.1	Vibrio cholerae strain FORC_055 isolate MFDS	Vibrio cholerae	Vibrio	3	Vibrio1
1244531529	NZ_CP016988.1	Vibrio cholerae strain FORC_055 isolate MFDS	Vibrio cholerae	Vibrio	3	Vibrio1
1254103432	NZ_LT907989.1	Vibrio cholerae strain A19	Vibrio cholerae	Vibrio	3	Vibrio1
1254103433	NZ_LT907990.1	Vibrio cholerae strain A19	Vibrio cholerae	Vibrio	3	Vibrio1
1274477268	NZ_CP024162.1	Vibrio cholerae strain E7946	Vibrio cholerae	Vibrio	3	Vibrio1
1274477269	NZ_CP024163.1	Vibrio cholerae strain E7946	Vibrio cholerae	Vibrio	3	Vibrio1
1317309948	NZ_LT897797.1	Vibrio cholerae isolate Vibrio cholerae str. BC1071	Vibrio cholerae	Vibrio	3	Vibrio1
1317310509	NZ_LT897798.1	Vibrio cholerae isolate Vibrio cholerae str. BC1071	Vibrio cholerae	Vibrio	3	Vibrio1
1333381612	NZ_CP025936.1	Vibrio cholerae strain A1552	Vibrio cholerae	Vibrio	3	Vibrio1
1333381613	NZ_CP025937.1	Vibrio cholerae strain A1552	Vibrio cholerae	Vibrio	3	Vibrio1
1352911925	NZ_CP026647.1	Vibrio cholerae O1 biovar El Tor strain HC1037	Vibrio cholerae	Vibrio	3	Vibrio1
1352911937	NZ_CP026648.1	Vibrio cholerae O1 biovar El Tor strain HC1037	Vibrio cholerae	Vibrio	3	Vibrio1
1355896309	NZ_CP020407.2	Vibrio cholerae strain FDAARGOS_223	Vibrio cholerae	Vibrio	3	Vibrio1
1355896483	NZ_CP020408.2	Vibrio cholerae strain FDAARGOS_223	Vibrio cholerae	Vibrio	3	Vibrio1
1360740179	NZ_CP024867.1	Vibrio cholerae strain A1552	Vibrio cholerae	Vibrio	3	Vibrio1
1360740180	NZ_CP024868.1	Vibrio cholerae strain A1552	Vibrio cholerae	Vibrio	3	Vibrio1
1383060520	NZ_CP028892.1	Vibrio cholerae strain Sa5Y	Vibrio cholerae	Vibrio	3	Vibrio1
1383060521	NZ_CP028893.1	Vibrio cholerae strain Sa5Y	Vibrio cholerae	Vibrio	3	Vibrio1
1383064851	NZ_CP028827.1	Vibrio cholerae strain N16961	Vibrio cholerae	Vibrio	3	Vibrio1
1383064852	NZ_CP028828.1	Vibrio cholerae strain N16961	Vibrio cholerae	Vibrio	3	Vibrio1
1387925452	NZ_LT992488.1	Vibrio cholerae strain 4295STDY6534232	Vibrio cholerae	Vibrio	3	Vibrio1
1387925453	NZ_LT992489.1	Vibrio cholerae strain 4295STDY6534232	Vibrio cholerae	Vibrio	3	Vibrio1
1387955169	NZ_LT992486.1	Vibrio cholerae strain 4295STDY6534216	Vibrio cholerae	Vibrio	3	Vibrio1
1387955279	NZ_LT992487.1	Vibrio cholerae strain 4295STDY6534216	Vibrio cholerae	Vibrio	3	Vibrio1
1387972319	NZ_LT992492.1	Vibrio cholerae strain 4295STDY6534248	Vibrio cholerae	Vibrio	3	Vibrio1
1387972320	NZ_LT992493.1	Vibrio cholerae strain 4295STDY6534248	Vibrio cholerae	Vibrio	3	Vibrio1
1388160422	NZ_CP028894.1	Vibrio cholerae strain A1552	Vibrio cholerae	Vibrio	3	Vibrio1
1388160423	NZ_CP028895.1	Vibrio cholerae strain A1552	Vibrio cholerae	Vibrio	3	Vibrio1
1478073951	NZ_AP018677.1	Vibrio cholerae strain V060002	Vibrio cholerae	Vibrio	3	Vibrio1
1482731116	NZ_CP024082.1	Vibrio cholerae strain FORC_073	Vibrio cholerae	Vibrio	3	Vibrio1
1511677483	NZ_CP033513.1	Vibrio cholerae strain E4	Vibrio cholerae	Vibrio	3	Vibrio1
1511677485	NZ_CP033515.1	Vibrio cholerae strain E4	Vibrio cholerae	Vibrio	3	Vibrio1
1565566409	NZ_CP026531.1	Vibrio cholerae strain FORC_076	Vibrio cholerae	Vibrio	3	Vibrio1
1565566466	NZ_CP026532.1	Vibrio cholerae strain FORC_076	Vibrio cholerae	Vibrio	3	Vibrio1
1590065787	NZ_CP036499.1	Vibrio cholerae strain 20000	Vibrio cholerae	Vibrio	3	Vibrio1
1590065829	NZ_CP036500.1	Vibrio cholerae strain 20000	Vibrio cholerae	Vibrio	3	Vibrio1
1731345976	NZ_LT906614.1	Vibrio cholerae O1 biovar El Tor str. N16961	Vibrio cholerae	Vibrio	3	Vibrio1
1731345977	NZ_LT906615.1	Vibrio cholerae O1 biovar El Tor str. N16961	Vibrio cholerae	Vibrio	3	Vibrio1
1741166712	NZ_CP043554.1	Vibrio cholerae strain RFB16	Vibrio cholerae	Vibrio	3	Vibrio1
1741166714	NZ_CP043556.1	Vibrio cholerae strain RFB16	Vibrio cholerae	Vibrio	3	Vibrio1
1741166855	NZ_CP043557.1	Vibrio cholerae strain RFB05	Vibrio cholerae	Vibrio	3	Vibrio1
1741166856	NZ_CP043558.1	Vibrio cholerae strain RFB05	Vibrio cholerae	Vibrio	3	Vibrio1
1774264598	NZ_CP045718.1	Vibrio cholerae O395 substr. TCP2	Vibrio cholerae	Vibrio	3	Vibrio1
1774264599	NZ_CP045719.1	Vibrio cholerae O395 substr. TCP2	Vibrio cholerae	Vibrio	3	Vibrio1
1782763761	CP038178.2	Vibrio cholerae strain 2010EL-1786	Vibrio cholerae	Vibrio	3	Vibrio1
1782763762	CP038179.2	Vibrio cholerae strain 2010EL-1786	Vibrio cholerae	Vibrio	3	Vibrio1
1785416948	CP046842.1	Vibrio cholerae strain K2802	Vibrio cholerae	Vibrio	3	Vibrio1
1785416949	CP046843.1	Vibrio cholerae strain K2802	Vibrio cholerae	Vibrio	3	Vibrio1
1785416969	CP046836.1	Vibrio cholerae strain 2011V-1043	Vibrio cholerae	Vibrio	3	Vibrio1
1785416970	CP046837.1	Vibrio cholerae strain 2011V-1043	Vibrio cholerae	Vibrio	3	Vibrio1
1788969202	NZ_CP046735.1	Vibrio cholerae strain 3528-08	Vibrio cholerae	Vibrio	3	Vibrio1
1788969203	NZ_CP046736.1	Vibrio cholerae strain 3528-08	Vibrio cholerae	Vibrio	3	Vibrio1
1788969548	NZ_CP046739.1	Vibrio cholerae strain 3566-06	Vibrio cholerae	Vibrio	3	Vibrio1
1788969549	NZ_CP046740.1	Vibrio cholerae strain 3566-06	Vibrio cholerae	Vibrio	3	Vibrio1
1788993387	NZ_CP046737.1	Vibrio cholerae strain 2015V-1126	Vibrio cholerae	Vibrio	3	Vibrio1
1788993491	NZ_CP046738.1	Vibrio cholerae strain 2015V-1126	Vibrio cholerae	Vibrio	3	Vibrio1
1788994001	NZ_CP046741.1	Vibrio cholerae strain 3523-03	Vibrio cholerae	Vibrio	3	Vibrio1
1788994009	NZ_CP046742.1	Vibrio cholerae strain 3523-03	Vibrio cholerae	Vibrio	3	Vibrio1
1788996425	NZ_CP046747.1	Vibrio cholerae strain 3541-04	Vibrio cholerae	Vibrio	3	Vibrio1
1788996426	NZ_CP046748.1	Vibrio cholerae strain 3541-04	Vibrio cholerae	Vibrio	3	Vibrio1
1788996432	NZ_CP046749.1	Vibrio cholerae strain 2015V-1118	Vibrio cholerae	Vibrio	3	Vibrio1
1788996446	NZ_CP046750.1	Vibrio cholerae strain 2015V-1118	Vibrio cholerae	Vibrio	3	Vibrio1
1788996675	NZ_CP046745.1	Vibrio cholerae strain 3566-08	Vibrio cholerae	Vibrio	3	Vibrio1
1788996704	NZ_CP046746.1	Vibrio cholerae strain 3566-08	Vibrio cholerae	Vibrio	3	Vibrio1
1789005470	NZ_CP046840.1	Vibrio cholerae strain F9993	Vibrio cholerae	Vibrio	3	Vibrio1
1789005484	NZ_CP046841.1	Vibrio cholerae strain F9993	Vibrio cholerae	Vibrio	3	Vibrio1
1789011890	NZ_CP046838.1	Vibrio cholerae strain 2011EL-1271	Vibrio cholerae	Vibrio	3	Vibrio1
1789011891	NZ_CP046839.1	Vibrio cholerae strain 2011EL-1271	Vibrio cholerae	Vibrio	3	Vibrio1
1789019824	NZ_CP046743.1	Vibrio cholerae strain 3569-08	Vibrio cholerae	Vibrio	3	Vibrio1
1789019922	NZ_CP046744.1	Vibrio cholerae strain 3569-08	Vibrio cholerae	Vibrio	3	Vibrio1
1789032877	NZ_CP046844.1	Vibrio cholerae C6706	Vibrio cholerae	Vibrio	3	Vibrio1
1789032898	NZ_CP046845.1	Vibrio cholerae C6706	Vibrio cholerae	Vibrio	3	Vibrio1
1797822644	NZ_CP047059.1	Vibrio cholerae isolate CTMA_1441	Vibrio cholerae	Vibrio	3	Vibrio1
1797822866	NZ_CP047060.1	Vibrio cholerae isolate CTMA_1441	Vibrio cholerae	Vibrio	3	Vibrio1
1802801326	NZ_CP042299.1	Vibrio cholerae O1 strain AAS91	Vibrio cholerae	Vibrio	3	Vibrio1
1802801418	NZ_CP042300.1	Vibrio cholerae O1 strain AAS91	Vibrio cholerae	Vibrio	3	Vibrio1
1841959099	NZ_CP047297.1	Vibrio cholerae O1 biovar El Tor strain C6709	Vibrio cholerae	Vibrio	3	Vibrio1
1841959216	NZ_CP047298.1	Vibrio cholerae O1 biovar El Tor strain C6709	Vibrio cholerae	Vibrio	3	Vibrio1
1841959227	NZ_CP047299.1	Vibrio cholerae O1 biovar El Tor strain P27459	Vibrio cholerae	Vibrio	3	Vibrio1
1841959228	NZ_CP047300.1	Vibrio cholerae O1 biovar El Tor strain P27459	Vibrio cholerae	Vibrio	3	Vibrio1
1841960646	NZ_CP047303.1	Vibrio cholerae O1 biovar El Tor strain E7946	Vibrio cholerae	Vibrio	3	Vibrio1
1841960647	NZ_CP047304.1	Vibrio cholerae O1 biovar El Tor strain E7946	Vibrio cholerae	Vibrio	3	Vibrio1
1841960649	NZ_CP047295.1	Vibrio cholerae C6706	Vibrio cholerae	Vibrio	3	Vibrio1
1841960685	NZ_CP047296.1	Vibrio cholerae C6706	Vibrio cholerae	Vibrio	3	Vibrio1
1841960711	NZ_CP047301.1	Vibrio cholerae O1 biovar El Tor strain DRC-193A	Vibrio cholerae	Vibrio	3	Vibrio1
1841960712	NZ_CP047302.1	Vibrio cholerae O1 biovar El Tor strain DRC-193A	Vibrio cholerae	Vibrio	3	Vibrio1
1844836951	CP053555.1	Vibrio cholerae strain CECT 514	Vibrio cholerae	Vibrio	3	Vibrio1
1844837288	CP053556.1	Vibrio cholerae strain CECT 514	Vibrio cholerae	Vibrio	3	Vibrio1
1847613775	NZ_CP051124.1	Vibrio cholerae strain 2010V-1116	Vibrio cholerae	Vibrio	3	Vibrio1
1847613778	NZ_CP051125.1	Vibrio cholerae strain 2010V-1116	Vibrio cholerae	Vibrio	3	Vibrio1
1856158636	NZ_LT992490.1	Vibrio cholerae strain 4295STDY6534200	Vibrio cholerae	Vibrio	3	Vibrio1
1856158637	NZ_LT992491.1	Vibrio cholerae strain 4295STDY6534200	Vibrio cholerae	Vibrio	3	Vibrio1
1859558124	NZ_CP053804.1	Vibrio cholerae strain SL6Y	Vibrio cholerae	Vibrio	3	Vibrio1
1859558390	NZ_CP053805.1	Vibrio cholerae strain SL6Y	Vibrio cholerae	Vibrio	3	Vibrio1
1859560770	NZ_CP053798.1	Vibrio cholerae strain SL5Y	Vibrio cholerae	Vibrio	3	Vibrio1
1859560771	NZ_CP053799.1	Vibrio cholerae strain SL5Y	Vibrio cholerae	Vibrio	3	Vibrio1
1859561087	NZ_CP053794.1	Vibrio cholerae strain W10G	Vibrio cholerae	Vibrio	3	Vibrio1
1859561221	NZ_CP053795.1	Vibrio cholerae strain W10G	Vibrio cholerae	Vibrio	3	Vibrio1
1859562939	NZ_CP053800.1	Vibrio cholerae strain SO5Y	Vibrio cholerae	Vibrio	3	Vibrio1
1859563037	NZ_CP053801.1	Vibrio cholerae strain SO5Y	Vibrio cholerae	Vibrio	3	Vibrio1
1859569640	NZ_CP053806.1	Vibrio cholerae strain SP6G	Vibrio cholerae	Vibrio	3	Vibrio1
1859569641	NZ_CP053807.1	Vibrio cholerae strain SP6G	Vibrio cholerae	Vibrio	3	Vibrio1
1859570237	NZ_CP053808.1	Vibrio cholerae strain SP7G	Vibrio cholerae	Vibrio	3	Vibrio1
1859570238	NZ_CP053809.1	Vibrio cholerae strain SP7G	Vibrio cholerae	Vibrio	3	Vibrio1
1859573854	NZ_CP053820.1	Vibrio cholerae strain SA10G	Vibrio cholerae	Vibrio	3	Vibrio1
1859573855	NZ_CP053821.1	Vibrio cholerae strain SA10G	Vibrio cholerae	Vibrio	3	Vibrio1
1859574671	NZ_CP053810.1	Vibrio cholerae strain W6G	Vibrio cholerae	Vibrio	3	Vibrio1
1859574672	NZ_CP053811.1	Vibrio cholerae strain W6G	Vibrio cholerae	Vibrio	3	Vibrio1
1859575015	NZ_CP053822.1	Vibrio cholerae strain E7G	Vibrio cholerae	Vibrio	3	Vibrio1
1859575016	NZ_CP053823.1	Vibrio cholerae strain E7G	Vibrio cholerae	Vibrio	3	Vibrio1
1859575135	NZ_CP053816.1	Vibrio cholerae strain SA7G	Vibrio cholerae	Vibrio	3	Vibrio1
1859575136	NZ_CP053817.1	Vibrio cholerae strain SA7G	Vibrio cholerae	Vibrio	3	Vibrio1
1859575870	NZ_CP053802.1	Vibrio cholerae strain L6G	Vibrio cholerae	Vibrio	3	Vibrio1
1859575871	NZ_CP053803.1	Vibrio cholerae strain L6G	Vibrio cholerae	Vibrio	3	Vibrio1
1859576932	NZ_CP053744.1	Vibrio cholerae strain SA3G	Vibrio cholerae	Vibrio	3	Vibrio1
1859576933	NZ_CP053745.1	Vibrio cholerae strain SA3G	Vibrio cholerae	Vibrio	3	Vibrio1
1859577164	NZ_CP053813.1	Vibrio cholerae strain W7G	Vibrio cholerae	Vibrio	3	Vibrio1
1859577165	NZ_CP053814.1	Vibrio cholerae strain W7G	Vibrio cholerae	Vibrio	3	Vibrio1
1859578515	NZ_CP053796.1	Vibrio cholerae strain SL4G	Vibrio cholerae	Vibrio	3	Vibrio1
1859578516	NZ_CP053797.1	Vibrio cholerae strain SL4G	Vibrio cholerae	Vibrio	3	Vibrio1
1878865431	NZ_CP040172.1	Vibrio cholerae strain VC1374	Vibrio cholerae	Vibrio	3	Vibrio1
1878865434	NZ_CP040173.1	Vibrio cholerae strain VC1374	Vibrio cholerae	Vibrio	3	Vibrio1
1893210918	NZ_CP060094.1	Vibrio cholerae MO10	Vibrio cholerae	Vibrio	3	Vibrio1
1893210919	NZ_CP060095.1	Vibrio cholerae MO10	Vibrio cholerae	Vibrio	3	Vibrio1
1928269640	NZ_CP063420.1	Vibrio cholerae strain VC_hf7	Vibrio cholerae	Vibrio	3	Vibrio1
1928270181	NZ_CP063421.1	Vibrio cholerae strain VC_hf7	Vibrio cholerae	Vibrio	3	Vibrio1
1932947117	NZ_CP064350.1	Vibrio cholerae C6706	Vibrio cholerae	Vibrio	3	Vibrio1
1932947118	NZ_CP064351.1	Vibrio cholerae C6706	Vibrio cholerae	Vibrio	3	Vibrio1
2026823684	NZ_CP072847.1	Vibrio cholerae strain A1552	Vibrio cholerae	Vibrio	3	Vibrio1
2026824328	NZ_CP072848.1	Vibrio cholerae strain A1552	Vibrio cholerae	Vibrio	3	Vibrio1
2026831757	NZ_CP072849.1	Vibrio cholerae MO10	Vibrio cholerae	Vibrio	3	Vibrio1
2026832116	NZ_CP072850.1	Vibrio cholerae MO10	Vibrio cholerae	Vibrio	3	Vibrio1
2036921853	NZ_CP047305.1	Vibrio cholerae O37 strain ATCC 25872	Vibrio cholerae	Vibrio	3	Vibrio1
2036921854	NZ_CP047306.1	Vibrio cholerae O37 strain ATCC 25872	Vibrio cholerae	Vibrio	3	Vibrio1
2069588868	CP078722.1	Vibrio cholerae strain Colony94	Vibrio cholerae	Vibrio	3	Vibrio1
2070532560	NZ_CP078725.1	Vibrio cholerae strain Colony605	Vibrio cholerae	Vibrio	3	Vibrio1
2070532944	NZ_CP078726.1	Vibrio cholerae strain Colony605	Vibrio cholerae	Vibrio	3	Vibrio1
2070550153	NZ_CP078727.1	Vibrio cholerae strain Colony11	Vibrio cholerae	Vibrio	3	Vibrio1
2070550155	NZ_CP078728.1	Vibrio cholerae strain Colony11	Vibrio cholerae	Vibrio	3	Vibrio1
2070556583	NZ_CP078723.1	Vibrio cholerae strain Colony268	Vibrio cholerae	Vibrio	3	Vibrio1
2070556584	NZ_CP078724.1	Vibrio cholerae strain Colony268	Vibrio cholerae	Vibrio	3	Vibrio1
2070558156	NZ_CP078719.1	Vibrio cholerae strain Colony98	Vibrio cholerae	Vibrio	3	Vibrio1
2070558157	NZ_CP078720.1	Vibrio cholerae strain Colony98	Vibrio cholerae	Vibrio	3	Vibrio1
2077358772	NZ_CP080465.1	Vibrio cholerae strain ICDC-VC3741	Vibrio cholerae	Vibrio	3	Vibrio1
2077358773	NZ_CP080466.1	Vibrio cholerae strain ICDC-VC3741	Vibrio cholerae	Vibrio	3	Vibrio1
2077363373	NZ_CP080462.1	Vibrio cholerae strain ICDC-VC702	Vibrio cholerae	Vibrio	3	Vibrio1
2077363374	NZ_CP080463.1	Vibrio cholerae strain ICDC-VC702	Vibrio cholerae	Vibrio	3	Vibrio1
2079465956	NZ_CP077197.1	Vibrio cholerae strain PS4	Vibrio cholerae	Vibrio	3	Vibrio1
2084176383	NZ_AP024553.1	Vibrio cholerae strain IDH-03329	Vibrio cholerae	Vibrio	3	Vibrio1
2084176384	NZ_AP024554.1	Vibrio cholerae strain IDH-03329	Vibrio cholerae	Vibrio	3	Vibrio1
2084178266	NZ_AP024547.1	Vibrio cholerae strain BCH-01536	Vibrio cholerae	Vibrio	3	Vibrio1
2084178267	NZ_AP024548.1	Vibrio cholerae strain BCH-01536	Vibrio cholerae	Vibrio	3	Vibrio1
2084182370	NZ_AP024555.1	Vibrio cholerae strain IDH-03506	Vibrio cholerae	Vibrio	3	Vibrio1
2084182371	NZ_AP024556.1	Vibrio cholerae strain IDH-03506	Vibrio cholerae	Vibrio	3	Vibrio1
2084192274	NZ_AP024551.1	Vibrio cholerae strain IDH-02387	Vibrio cholerae	Vibrio	3	Vibrio1
2084192322	NZ_AP024552.1	Vibrio cholerae strain IDH-02387	Vibrio cholerae	Vibrio	3	Vibrio1
2084197954	NZ_AP024549.1	Vibrio cholerae strain IDH-00113	Vibrio cholerae	Vibrio	3	Vibrio1
2084197955	NZ_AP024550.1	Vibrio cholerae strain IDH-00113	Vibrio cholerae	Vibrio	3	Vibrio1
2176818229	NZ_CP090399.1	Vibrio cholerae strain PanChol	Vibrio cholerae	Vibrio	3	Vibrio1
2176818522	NZ_CP090400.1	Vibrio cholerae strain PanChol	Vibrio cholerae	Vibrio	3	Vibrio1
2176842234	NZ_CP090386.1	Vibrio cholerae strain GXFL1-4	Vibrio cholerae	Vibrio	3	Vibrio1
2176842238	NZ_CP090387.1	Vibrio cholerae strain GXFL1-4	Vibrio cholerae	Vibrio	3	Vibrio1
1069635943	NZ_CP009467.1	Vibrio harveyi strain ATCC 33843 (392 [MAV])	Vibrio harveyi	Vibrio	4	Vibrio2
1069635944	NZ_CP009468.1	Vibrio harveyi strain ATCC 33843 (392 [MAV])	Vibrio harveyi	Vibrio	4	Vibrio2
1132114018	NZ_CP018680.2	Vibrio harveyi strain QT520	Vibrio harveyi	Vibrio	4	Vibrio2
1132114019	NZ_CP018681.2	Vibrio harveyi strain QT520	Vibrio harveyi	Vibrio	4	Vibrio2
1326071254	NZ_CP025537.1	Vibrio harveyi strain 345	Vibrio harveyi	Vibrio	4	Vibrio2
1326071255	NZ_CP025538.1	Vibrio harveyi strain 345	Vibrio harveyi	Vibrio	4	Vibrio2
1348894023	NZ_CP014038.2	Vibrio harveyi strain FDAARGOS_107	Vibrio harveyi	Vibrio	4	Vibrio2
1348894024	NZ_CP014039.2	Vibrio harveyi strain FDAARGOS_107	Vibrio harveyi	Vibrio	4	Vibrio2
1768367862	NZ_CP045070.1	Vibrio harveyi strain WXL538	Vibrio harveyi	Vibrio	4	Vibrio2
1768367863	NZ_CP045071.1	Vibrio harveyi strain WXL538	Vibrio harveyi	Vibrio	4	Vibrio2
1777064615	NZ_CP035692.1	Vibrio harveyi strain 2011V-1164	Vibrio harveyi	Vibrio	4	Vibrio2
1777064616	NZ_CP035693.1	Vibrio harveyi strain 2011V-1164	Vibrio harveyi	Vibrio	4	Vibrio2
1847672803	NZ_CP051122.1	Vibrio harveyi strain 2010V-1024	Vibrio harveyi	Vibrio	4	Vibrio2
1847672804	NZ_CP051123.1	Vibrio harveyi strain 2010V-1024	Vibrio harveyi	Vibrio	4	Vibrio2
2175968608	NZ_CP090178.1	Vibrio harveyi strain XH2145	Vibrio harveyi	Vibrio	4	Vibrio2
2175968609	NZ_CP090179.1	Vibrio harveyi strain XH2145	Vibrio harveyi	Vibrio	4	Vibrio2
28896774	NC_004603.1	Vibrio parahaemolyticus RIMD 2210633	Vibrio parahaemolyticus	Vibrio	4	Vibrio2
28899855	NC_004605.1	Vibrio parahaemolyticus RIMD 2210633	Vibrio parahaemolyticus	Vibrio	4	Vibrio2
433656322	NC_019955.1	Vibrio parahaemolyticus BB22OP	Vibrio parahaemolyticus	Vibrio	4	Vibrio2
433659170	NC_019971.1	Vibrio parahaemolyticus BB22OP	Vibrio parahaemolyticus	Vibrio	4	Vibrio2
525847173	NC_021821.1	Vibrio parahaemolyticus O1:Kuk str. FDA_R31	Vibrio parahaemolyticus	Vibrio	4	Vibrio2
525852846	NC_021822.1	Vibrio parahaemolyticus O1:K33 str. CDC_K4557	Vibrio parahaemolyticus	Vibrio	4	Vibrio2
525949893	NC_021847.1	Vibrio parahaemolyticus O1:Kuk str. FDA_R31	Vibrio parahaemolyticus	Vibrio	4	Vibrio2
525957490	NC_021848.1	Vibrio parahaemolyticus O1:K33 str. CDC_K4557	Vibrio parahaemolyticus	Vibrio	4	Vibrio2
749295119	NZ_CP007004.1	Vibrio parahaemolyticus UCM-V493	Vibrio parahaemolyticus	Vibrio	4	Vibrio2
749295152	NZ_CP007005.1	Vibrio parahaemolyticus UCM-V493	Vibrio parahaemolyticus	Vibrio	4	Vibrio2
920675253	NZ_CP009982.1	Vibrio parahaemolyticus strain FORC_008	Vibrio parahaemolyticus	Vibrio	4	Vibrio2
920675323	NZ_CP009983.1	Vibrio parahaemolyticus strain FORC_008	Vibrio parahaemolyticus	Vibrio	4	Vibrio2
951138292	NZ_CP009847.1	Vibrio parahaemolyticus strain FORC_004	Vibrio parahaemolyticus	Vibrio	4	Vibrio2
951138403	NZ_CP009848.1	Vibrio parahaemolyticus strain FORC_004	Vibrio parahaemolyticus	Vibrio	4	Vibrio2
983506291	NZ_CP009765.1	Vibrio parahaemolyticus strain FORC_006	Vibrio parahaemolyticus	Vibrio	4	Vibrio2
983506292	NZ_CP009766.1	Vibrio parahaemolyticus strain FORC_006	Vibrio parahaemolyticus	Vibrio	4	Vibrio2
1024866484	NZ_CP011406.1	Vibrio parahaemolyticus strain FORC_014	Vibrio parahaemolyticus	Vibrio	4	Vibrio2
1024866485	NZ_CP011407.1	Vibrio parahaemolyticus strain FORC_014	Vibrio parahaemolyticus	Vibrio	4	Vibrio2
1051401601	NZ_CP010883.1	Vibrio parahaemolyticus strain CHN25	Vibrio parahaemolyticus	Vibrio	4	Vibrio2
1051403477	NZ_CP010884.1	Vibrio parahaemolyticus strain CHN25	Vibrio parahaemolyticus	Vibrio	4	Vibrio2
1079824261	NZ_CP012950.1	Vibrio parahaemolyticus strain FORC_023 isolate 378	Vibrio parahaemolyticus	Vibrio	4	Vibrio2
1079824262	NZ_CP012951.1	Vibrio parahaemolyticus strain FORC_023 isolate 378	Vibrio parahaemolyticus	Vibrio	4	Vibrio2
1103293646	NZ_CP013248.1	Vibrio parahaemolyticus strain FORC_022	Vibrio parahaemolyticus	Vibrio	4	Vibrio2
1103293647	NZ_CP013249.1	Vibrio parahaemolyticus strain FORC_022	Vibrio parahaemolyticus	Vibrio	4	Vibrio2
1110711029	NZ_CP013826.1	Vibrio parahaemolyticus strain FORC_018	Vibrio parahaemolyticus	Vibrio	4	Vibrio2
1110711030	NZ_CP013827.1	Vibrio parahaemolyticus strain FORC_018	Vibrio parahaemolyticus	Vibrio	4	Vibrio2
1132624151	NZ_CP019059.1	Vibrio parahaemolyticus strain 1682 isolate V12/023	Vibrio parahaemolyticus	Vibrio	4	Vibrio2
1132624152	NZ_CP019060.1	Vibrio parahaemolyticus strain 1682 isolate V12/023	Vibrio parahaemolyticus	Vibrio	4	Vibrio2
1180447801	NZ_CP011884.1	Vibrio parahaemolyticus strain MAVP-Q	Vibrio parahaemolyticus	Vibrio	4	Vibrio2
1180447802	NZ_CP011885.1	Vibrio parahaemolyticus strain MAVP-Q	Vibrio parahaemolyticus	Vibrio	4	Vibrio2
1226970475	NZ_CP022472.1	Vibrio parahaemolyticus strain MAVP-Q	Vibrio parahaemolyticus	Vibrio	4	Vibrio2
1226970476	NZ_CP022473.1	Vibrio parahaemolyticus strain MAVP-Q	Vibrio parahaemolyticus	Vibrio	4	Vibrio2
1255268373	NZ_CP023709.1	Vibrio parahaemolyticus strain HA2	Vibrio parahaemolyticus	Vibrio	4	Vibrio2
1255268374	NZ_CP023710.1	Vibrio parahaemolyticus strain HA2	Vibrio parahaemolyticus	Vibrio	4	Vibrio2
1337936977	NZ_CP026041.1	Vibrio parahaemolyticus strain FDAARGOS_51	Vibrio parahaemolyticus	Vibrio	4	Vibrio2
1337936978	NZ_CP026042.1	Vibrio parahaemolyticus strain FDAARGOS_51	Vibrio parahaemolyticus	Vibrio	4	Vibrio2
1348895222	NZ_CP014046.2	Vibrio parahaemolyticus strain ATCC 17802	Vibrio parahaemolyticus	Vibrio	4	Vibrio2
1348895223	NZ_CP014047.2	Vibrio parahaemolyticus strain ATCC 17802	Vibrio parahaemolyticus	Vibrio	4	Vibrio2
1358810573	NZ_CP020427.2	Vibrio parahaemolyticus strain FDAARGOS_191	Vibrio parahaemolyticus	Vibrio	4	Vibrio2
1358810574	NZ_CP020428.2	Vibrio parahaemolyticus strain FDAARGOS_191	Vibrio parahaemolyticus	Vibrio	4	Vibrio2
1384868086	NZ_CP022552.2	Vibrio parahaemolyticus strain MAVP-R	Vibrio parahaemolyticus	Vibrio	4	Vibrio2
1384868087	NZ_CP022553.2	Vibrio parahaemolyticus strain MAVP-R	Vibrio parahaemolyticus	Vibrio	4	Vibrio2
1386807221	NZ_CP020034.1	Vibrio parahaemolyticus strain 20130629002S01	Vibrio parahaemolyticus	Vibrio	4	Vibrio2
1386807222	NZ_CP020035.1	Vibrio parahaemolyticus strain 20130629002S01	Vibrio parahaemolyticus	Vibrio	4	Vibrio2
1386808059	NZ_CP028141.1	Vibrio parahaemolyticus strain R14	Vibrio parahaemolyticus	Vibrio	4	Vibrio2
1386808060	NZ_CP028142.1	Vibrio parahaemolyticus strain R14	Vibrio parahaemolyticus	Vibrio	4	Vibrio2
1390958999	NZ_CP028342.1	Vibrio parahaemolyticus isolate R13	Vibrio parahaemolyticus	Vibrio	4	Vibrio2
1390959000	NZ_CP028343.1	Vibrio parahaemolyticus isolate R13	Vibrio parahaemolyticus	Vibrio	4	Vibrio2
1441334013	NZ_CP022243.1	Vibrio parahaemolyticus strain PB1937	Vibrio parahaemolyticus	Vibrio	4	Vibrio2
1441334014	NZ_CP022244.1	Vibrio parahaemolyticus strain PB1937	Vibrio parahaemolyticus	Vibrio	4	Vibrio2
1487811537	NZ_CP023485.1	Vibrio parahaemolyticus strain FORC_071	Vibrio parahaemolyticus	Vibrio	4	Vibrio2
1487811538	NZ_CP023486.1	Vibrio parahaemolyticus strain FORC_071	Vibrio parahaemolyticus	Vibrio	4	Vibrio2
1487855459	NZ_CP023472.1	Vibrio parahaemolyticus strain FORC_072	Vibrio parahaemolyticus	Vibrio	4	Vibrio2
1487855460	NZ_CP023473.1	Vibrio parahaemolyticus strain FORC_072	Vibrio parahaemolyticus	Vibrio	4	Vibrio2
1501164869	NZ_CP033141.1	Vibrio parahaemolyticus strain 160807	Vibrio parahaemolyticus	Vibrio	4	Vibrio2
1501165198	NZ_CP033142.1	Vibrio parahaemolyticus strain 160807	Vibrio parahaemolyticus	Vibrio	4	Vibrio2
1553365081	NZ_CP031781.1	Vibrio parahaemolyticus strain VPD14	Vibrio parahaemolyticus	Vibrio	4	Vibrio2
1553365181	NZ_CP031782.1	Vibrio parahaemolyticus strain VPD14	Vibrio parahaemolyticus	Vibrio	4	Vibrio2
1575379712	NZ_CP034565.1	Vibrio parahaemolyticus strain D3112	Vibrio parahaemolyticus	Vibrio	4	Vibrio2
1575379713	NZ_CP034566.1	Vibrio parahaemolyticus strain D3112	Vibrio parahaemolyticus	Vibrio	4	Vibrio2
1606903930	NZ_CP028481.1	Vibrio parahaemolyticus strain S107-1	Vibrio parahaemolyticus	Vibrio	4	Vibrio2
1606903939	NZ_CP028482.1	Vibrio parahaemolyticus strain S107-1	Vibrio parahaemolyticus	Vibrio	4	Vibrio2
1696709991	NZ_CP041201.1	Vibrio parahaemolyticus strain Vb0624	Vibrio parahaemolyticus	Vibrio	4	Vibrio2
1696709992	NZ_CP041202.1	Vibrio parahaemolyticus strain Vb0624	Vibrio parahaemolyticus	Vibrio	4	Vibrio2
1740674289	NZ_CP043421.1	Vibrio parahaemolyticus strain MVP1	Vibrio parahaemolyticus	Vibrio	4	Vibrio2
1740674290	NZ_CP043422.1	Vibrio parahaemolyticus strain MVP1	Vibrio parahaemolyticus	Vibrio	4	Vibrio2
1752193941	NZ_CP044062.1	Vibrio parahaemolyticus strain FDAARGOS_667	Vibrio parahaemolyticus	Vibrio	4	Vibrio2
1752193942	NZ_CP044063.1	Vibrio parahaemolyticus strain FDAARGOS_667	Vibrio parahaemolyticus	Vibrio	4	Vibrio2
1752204773	NZ_CP044070.1	Vibrio parahaemolyticus strain FDAARGOS_662	Vibrio parahaemolyticus	Vibrio	4	Vibrio2
1752204774	NZ_CP044071.1	Vibrio parahaemolyticus strain FDAARGOS_662	Vibrio parahaemolyticus	Vibrio	4	Vibrio2
1774807914	NZ_CP045794.1	Vibrio parahaemolyticus 10329	Vibrio parahaemolyticus	Vibrio	4	Vibrio2
1774807990	NZ_CP045795.1	Vibrio parahaemolyticus 10329	Vibrio parahaemolyticus	Vibrio	4	Vibrio2
1776953754	NZ_CP035701.1	Vibrio parahaemolyticus strain 2012AW-0154	Vibrio parahaemolyticus	Vibrio	4	Vibrio2
1776953943	NZ_CP035702.1	Vibrio parahaemolyticus strain 2012AW-0154	Vibrio parahaemolyticus	Vibrio	4	Vibrio2
1783016768	NZ_CP046411.1	Vibrio parahaemolyticus strain 19-021-D1	Vibrio parahaemolyticus	Vibrio	4	Vibrio2
1783017022	NZ_CP046412.1	Vibrio parahaemolyticus strain 19-021-D1	Vibrio parahaemolyticus	Vibrio	4	Vibrio2
1788974843	NZ_CP046759.1	Vibrio parahaemolyticus strain AM51552	Vibrio parahaemolyticus	Vibrio	4	Vibrio2
1788974844	NZ_CP046760.1	Vibrio parahaemolyticus strain AM51552	Vibrio parahaemolyticus	Vibrio	4	Vibrio2
1788977447	NZ_CP046761.1	Vibrio parahaemolyticus strain AM46865	Vibrio parahaemolyticus	Vibrio	4	Vibrio2
1788977547	NZ_CP046762.1	Vibrio parahaemolyticus strain AM46865	Vibrio parahaemolyticus	Vibrio	4	Vibrio2
1788977670	NZ_CP046777.1	Vibrio parahaemolyticus strain 2014V-1125	Vibrio parahaemolyticus	Vibrio	4	Vibrio2
1788977671	NZ_CP046778.1	Vibrio parahaemolyticus strain 2014V-1125	Vibrio parahaemolyticus	Vibrio	4	Vibrio2
1788977677	NZ_CP046779.1	Vibrio parahaemolyticus strain 2014V-1066	Vibrio parahaemolyticus	Vibrio	4	Vibrio2
1788977678	NZ_CP046780.1	Vibrio parahaemolyticus strain 2014V-1066	Vibrio parahaemolyticus	Vibrio	4	Vibrio2
1788978562	NZ_CP046781.1	Vibrio parahaemolyticus strain 2013V-1244	Vibrio parahaemolyticus	Vibrio	4	Vibrio2
1788978675	NZ_CP046782.1	Vibrio parahaemolyticus strain 2013V-1244	Vibrio parahaemolyticus	Vibrio	4	Vibrio2
1788978865	NZ_CP046783.1	Vibrio parahaemolyticus strain 2013V-1181	Vibrio parahaemolyticus	Vibrio	4	Vibrio2
1788978866	NZ_CP046784.1	Vibrio parahaemolyticus strain 2013V-1181	Vibrio parahaemolyticus	Vibrio	4	Vibrio2
1788979905	NZ_CP046785.1	Vibrio parahaemolyticus strain 2013V-1136	Vibrio parahaemolyticus	Vibrio	4	Vibrio2
1788979975	NZ_CP046786.1	Vibrio parahaemolyticus strain 2013V-1136	Vibrio parahaemolyticus	Vibrio	4	Vibrio2
1788995268	NZ_CP046775.1	Vibrio parahaemolyticus strain AM43962	Vibrio parahaemolyticus	Vibrio	4	Vibrio2
1788995328	NZ_CP046776.1	Vibrio parahaemolyticus strain AM43962	Vibrio parahaemolyticus	Vibrio	4	Vibrio2
1788999344	NZ_CP046763.1	Vibrio parahaemolyticus strain 2012AW-0353	Vibrio parahaemolyticus	Vibrio	4	Vibrio2
1788999345	NZ_CP046764.1	Vibrio parahaemolyticus strain 2012AW-0353	Vibrio parahaemolyticus	Vibrio	4	Vibrio2
1789000381	NZ_CP046787.1	Vibrio parahaemolyticus strain 2013V-1174	Vibrio parahaemolyticus	Vibrio	4	Vibrio2
1789000491	NZ_CP046788.1	Vibrio parahaemolyticus strain 2013V-1174	Vibrio parahaemolyticus	Vibrio	4	Vibrio2
1789020864	NZ_CP046753.1	Vibrio parahaemolyticus strain 2015AW-0174	Vibrio parahaemolyticus	Vibrio	4	Vibrio2
1789020865	NZ_CP046754.1	Vibrio parahaemolyticus strain 2015AW-0174	Vibrio parahaemolyticus	Vibrio	4	Vibrio2
1789024617	NZ_CP046808.1	Vibrio parahaemolyticus strain 2013V-1146	Vibrio parahaemolyticus	Vibrio	4	Vibrio2
1789024720	NZ_CP046809.1	Vibrio parahaemolyticus strain 2013V-1146	Vibrio parahaemolyticus	Vibrio	4	Vibrio2
1789036714	NZ_CP046829.1	Vibrio parahaemolyticus strain 2012AW-0224	Vibrio parahaemolyticus	Vibrio	4	Vibrio2
1789036831	NZ_CP046831.1	Vibrio parahaemolyticus strain 2012AW-0224	Vibrio parahaemolyticus	Vibrio	4	Vibrio2
1789037222	NZ_CP046827.1	Vibrio parahaemolyticus strain 2010V-1106	Vibrio parahaemolyticus	Vibrio	4	Vibrio2
1789037251	NZ_CP046828.1	Vibrio parahaemolyticus strain 2010V-1106	Vibrio parahaemolyticus	Vibrio	4	Vibrio2
1798090895	NZ_CP034285.1	Vibrio parahaemolyticus strain 20140624012-1	Vibrio parahaemolyticus	Vibrio	4	Vibrio2
1798090896	NZ_CP034286.1	Vibrio parahaemolyticus strain 20140624012-1	Vibrio parahaemolyticus	Vibrio	4	Vibrio2
1798106420	NZ_CP034305.1	Vibrio parahaemolyticus strain 20151116002-3	Vibrio parahaemolyticus	Vibrio	4	Vibrio2
1798106421	NZ_CP034306.1	Vibrio parahaemolyticus strain 20151116002-3	Vibrio parahaemolyticus	Vibrio	4	Vibrio2
1798108368	NZ_CP034289.1	Vibrio parahaemolyticus strain 20140722001-1	Vibrio parahaemolyticus	Vibrio	4	Vibrio2
1798108369	NZ_CP034290.1	Vibrio parahaemolyticus strain 20140722001-1	Vibrio parahaemolyticus	Vibrio	4	Vibrio2
1798108439	NZ_CP034294.1	Vibrio parahaemolyticus strain 20140829008-1	Vibrio parahaemolyticus	Vibrio	4	Vibrio2
1798108440	NZ_CP034295.1	Vibrio parahaemolyticus strain 20140829008-1	Vibrio parahaemolyticus	Vibrio	4	Vibrio2
1798108686	NZ_CP034298.1	Vibrio parahaemolyticus strain 20160303005-1	Vibrio parahaemolyticus	Vibrio	4	Vibrio2
1798108687	NZ_CP034299.1	Vibrio parahaemolyticus strain 20160303005-1	Vibrio parahaemolyticus	Vibrio	4	Vibrio2
1847646693	NZ_CP051113.1	Vibrio parahaemolyticus strain 2012V-1116	Vibrio parahaemolyticus	Vibrio	4	Vibrio2
1847646694	NZ_CP051114.1	Vibrio parahaemolyticus strain 2012V-1116	Vibrio parahaemolyticus	Vibrio	4	Vibrio2
1847651915	NZ_CP051099.1	Vibrio parahaemolyticus strain AM51557	Vibrio parahaemolyticus	Vibrio	4	Vibrio2
1847651916	NZ_CP051100.1	Vibrio parahaemolyticus strain AM51557	Vibrio parahaemolyticus	Vibrio	4	Vibrio2
1867894038	NZ_CP040103.1	Vibrio parahaemolyticus strain LVP66	Vibrio parahaemolyticus	Vibrio	4	Vibrio2
1867894039	NZ_CP040104.1	Vibrio parahaemolyticus strain LVP66	Vibrio parahaemolyticus	Vibrio	4	Vibrio2
1867898386	NZ_CP040099.1	Vibrio parahaemolyticus strain LVP1	Vibrio parahaemolyticus	Vibrio	4	Vibrio2
1867898389	NZ_CP040100.1	Vibrio parahaemolyticus strain LVP1	Vibrio parahaemolyticus	Vibrio	4	Vibrio2
1867934478	NZ_CP040101.1	Vibrio parahaemolyticus strain LVP2	Vibrio parahaemolyticus	Vibrio	4	Vibrio2
1867934690	NZ_CP040102.1	Vibrio parahaemolyticus strain LVP2	Vibrio parahaemolyticus	Vibrio	4	Vibrio2
1893228749	NZ_CP060087.1	Vibrio parahaemolyticus strain TJA114	Vibrio parahaemolyticus	Vibrio	4	Vibrio2
1893228834	NZ_CP060088.1	Vibrio parahaemolyticus strain TJA114	Vibrio parahaemolyticus	Vibrio	4	Vibrio2
1912471657	NZ_CP051111.1	Vibrio parahaemolyticus strain 2012V-1165	Vibrio parahaemolyticus	Vibrio	4	Vibrio2
1912471696	NZ_CP051112.1	Vibrio parahaemolyticus strain 2012V-1165	Vibrio parahaemolyticus	Vibrio	4	Vibrio2
1927790419	CP063525.1	Vibrio parahaemolyticus strain BTXS2	Vibrio parahaemolyticus	Vibrio	4	Vibrio2
1927792605	CP063526.1	Vibrio parahaemolyticus strain BTXS2	Vibrio parahaemolyticus	Vibrio	4	Vibrio2
1940991026	NZ_CP065369.1	Vibrio parahaemolyticus strain 20-082A3	Vibrio parahaemolyticus	Vibrio	4	Vibrio2
1940991094	NZ_CP065370.1	Vibrio parahaemolyticus strain 20-082A3	Vibrio parahaemolyticus	Vibrio	4	Vibrio2
2021269085	NZ_CP069236.1	Vibrio parahaemolyticus strain HP1	Vibrio parahaemolyticus	Vibrio	4	Vibrio2
2021269086	NZ_CP069237.1	Vibrio parahaemolyticus strain HP1	Vibrio parahaemolyticus	Vibrio	4	Vibrio2
2021269361	NZ_CP066244.1	Vibrio parahaemolyticus strain 81TDH2	Vibrio parahaemolyticus	Vibrio	4	Vibrio2
2021269439	NZ_CP066245.1	Vibrio parahaemolyticus strain 81TDH2	Vibrio parahaemolyticus	Vibrio	4	Vibrio2
2021291921	NZ_CP066156.1	Vibrio parahaemolyticus strain SHP/2	Vibrio parahaemolyticus	Vibrio	4	Vibrio2
2021291933	NZ_CP066157.1	Vibrio parahaemolyticus strain SHP/2	Vibrio parahaemolyticus	Vibrio	4	Vibrio2
2021297466	NZ_CP066160.1	Vibrio parahaemolyticus strain NUK/7	Vibrio parahaemolyticus	Vibrio	4	Vibrio2
2021297467	NZ_CP066161.1	Vibrio parahaemolyticus strain NUK/7	Vibrio parahaemolyticus	Vibrio	4	Vibrio2
2037008747	NZ_CP073068.1	Vibrio parahaemolyticus strain FB-11	Vibrio parahaemolyticus	Vibrio	4	Vibrio2
2037008960	NZ_CP073069.1	Vibrio parahaemolyticus strain FB-11	Vibrio parahaemolyticus	Vibrio	4	Vibrio2
2051281621	NZ_CP076383.1	Vibrio parahaemolyticus strain Colony41	Vibrio parahaemolyticus	Vibrio	4	Vibrio2
2051281622	NZ_CP076384.1	Vibrio parahaemolyticus strain Colony41	Vibrio parahaemolyticus	Vibrio	4	Vibrio2
2070529819	NZ_CP078615.1	Vibrio parahaemolyticus strain Colony558	Vibrio parahaemolyticus	Vibrio	4	Vibrio2
2070529820	NZ_CP078616.1	Vibrio parahaemolyticus strain Colony558	Vibrio parahaemolyticus	Vibrio	4	Vibrio2
2070530115	NZ_CP078647.1	Vibrio parahaemolyticus strain Colony269	Vibrio parahaemolyticus	Vibrio	4	Vibrio2
2070530116	NZ_CP078648.1	Vibrio parahaemolyticus strain Colony269	Vibrio parahaemolyticus	Vibrio	4	Vibrio2
2070530254	NZ_CP078685.1	Vibrio parahaemolyticus strain Colony28	Vibrio parahaemolyticus	Vibrio	4	Vibrio2
2070530263	NZ_CP078686.1	Vibrio parahaemolyticus strain Colony28	Vibrio parahaemolyticus	Vibrio	4	Vibrio2
2070531163	NZ_CP078735.1	Vibrio parahaemolyticus strain Colony90	Vibrio parahaemolyticus	Vibrio	4	Vibrio2
2070531164	NZ_CP078736.1	Vibrio parahaemolyticus strain Colony90	Vibrio parahaemolyticus	Vibrio	4	Vibrio2
2070531512	NZ_CP078609.1	Vibrio parahaemolyticus strain Colony602	Vibrio parahaemolyticus	Vibrio	4	Vibrio2
2070531513	NZ_CP078610.1	Vibrio parahaemolyticus strain Colony602	Vibrio parahaemolyticus	Vibrio	4	Vibrio2
2070531514	NZ_CP078625.1	Vibrio parahaemolyticus strain Colony553	Vibrio parahaemolyticus	Vibrio	4	Vibrio2
2070531515	NZ_CP078626.1	Vibrio parahaemolyticus strain Colony553	Vibrio parahaemolyticus	Vibrio	4	Vibrio2
2070531516	NZ_CP078667.1	Vibrio parahaemolyticus strain Colony99	Vibrio parahaemolyticus	Vibrio	4	Vibrio2
2070531517	NZ_CP078668.1	Vibrio parahaemolyticus strain Colony99	Vibrio parahaemolyticus	Vibrio	4	Vibrio2
2070531670	NZ_CP078635.1	Vibrio parahaemolyticus strain Colony547	Vibrio parahaemolyticus	Vibrio	4	Vibrio2
2070531671	NZ_CP078636.1	Vibrio parahaemolyticus strain Colony547	Vibrio parahaemolyticus	Vibrio	4	Vibrio2
2070531812	NZ_CP078657.1	Vibrio parahaemolyticus strain Colony525	Vibrio parahaemolyticus	Vibrio	4	Vibrio2
2070531813	NZ_CP078658.1	Vibrio parahaemolyticus strain Colony525	Vibrio parahaemolyticus	Vibrio	4	Vibrio2
2070531814	NZ_CP078669.1	Vibrio parahaemolyticus strain Colony46	Vibrio parahaemolyticus	Vibrio	4	Vibrio2
2070531815	NZ_CP078670.1	Vibrio parahaemolyticus strain Colony46	Vibrio parahaemolyticus	Vibrio	4	Vibrio2
2070531816	NZ_CP078691.1	Vibrio parahaemolyticus strain Colony15	Vibrio parahaemolyticus	Vibrio	4	Vibrio2
2070531817	NZ_CP078692.1	Vibrio parahaemolyticus strain Colony15	Vibrio parahaemolyticus	Vibrio	4	Vibrio2
2070533193	NZ_CP078659.1	Vibrio parahaemolyticus strain Colony523	Vibrio parahaemolyticus	Vibrio	4	Vibrio2
2070533194	NZ_CP078660.1	Vibrio parahaemolyticus strain Colony523	Vibrio parahaemolyticus	Vibrio	4	Vibrio2
2070533195	NZ_CP078701.1	Vibrio parahaemolyticus strain Colony91	Vibrio parahaemolyticus	Vibrio	4	Vibrio2
2070533196	NZ_CP078702.1	Vibrio parahaemolyticus strain Colony91	Vibrio parahaemolyticus	Vibrio	4	Vibrio2
2070533901	NZ_CP078627.1	Vibrio parahaemolyticus strain Colony552	Vibrio parahaemolyticus	Vibrio	4	Vibrio2
2070533902	NZ_CP078628.1	Vibrio parahaemolyticus strain Colony552	Vibrio parahaemolyticus	Vibrio	4	Vibrio2
2070533903	NZ_CP078671.1	Vibrio parahaemolyticus strain Colony45	Vibrio parahaemolyticus	Vibrio	4	Vibrio2
2070533904	NZ_CP078672.1	Vibrio parahaemolyticus strain Colony45	Vibrio parahaemolyticus	Vibrio	4	Vibrio2
2070534185	NZ_CP078637.1	Vibrio parahaemolyticus strain Colony546	Vibrio parahaemolyticus	Vibrio	4	Vibrio2
2070534186	NZ_CP078638.1	Vibrio parahaemolyticus strain Colony546	Vibrio parahaemolyticus	Vibrio	4	Vibrio2
2070536220	NZ_CP078613.1	Vibrio parahaemolyticus strain Colony559	Vibrio parahaemolyticus	Vibrio	4	Vibrio2
2070536221	NZ_CP078614.1	Vibrio parahaemolyticus strain Colony559	Vibrio parahaemolyticus	Vibrio	4	Vibrio2
2070538736	NZ_CP078643.1	Vibrio parahaemolyticus strain Colony395	Vibrio parahaemolyticus	Vibrio	4	Vibrio2
2070538737	NZ_CP078644.1	Vibrio parahaemolyticus strain Colony395	Vibrio parahaemolyticus	Vibrio	4	Vibrio2
2070540975	NZ_CP078651.1	Vibrio parahaemolyticus strain Colony92	Vibrio parahaemolyticus	Vibrio	4	Vibrio2
2070541142	NZ_CP078652.1	Vibrio parahaemolyticus strain Colony92	Vibrio parahaemolyticus	Vibrio	4	Vibrio2
2070541730	NZ_CP078679.1	Vibrio parahaemolyticus strain Colony35	Vibrio parahaemolyticus	Vibrio	4	Vibrio2
2070541845	NZ_CP078680.1	Vibrio parahaemolyticus strain Colony35	Vibrio parahaemolyticus	Vibrio	4	Vibrio2
2070542125	NZ_CP078653.1	Vibrio parahaemolyticus strain Colony184	Vibrio parahaemolyticus	Vibrio	4	Vibrio2
2070542126	NZ_CP078654.1	Vibrio parahaemolyticus strain Colony184	Vibrio parahaemolyticus	Vibrio	4	Vibrio2
2070542133	NZ_CP078689.1	Vibrio parahaemolyticus strain Colony18	Vibrio parahaemolyticus	Vibrio	4	Vibrio2
2070542134	NZ_CP078690.1	Vibrio parahaemolyticus strain Colony18	Vibrio parahaemolyticus	Vibrio	4	Vibrio2
2070542585	NZ_CP078729.1	Vibrio parahaemolyticus strain Colony127	Vibrio parahaemolyticus	Vibrio	4	Vibrio2
2070542586	NZ_CP078730.1	Vibrio parahaemolyticus strain Colony127	Vibrio parahaemolyticus	Vibrio	4	Vibrio2
2070543226	NZ_CP078639.1	Vibrio parahaemolyticus strain Colony545	Vibrio parahaemolyticus	Vibrio	4	Vibrio2
2070543227	NZ_CP078640.1	Vibrio parahaemolyticus strain Colony545	Vibrio parahaemolyticus	Vibrio	4	Vibrio2
2070543239	NZ_CP078681.1	Vibrio parahaemolyticus strain Colony34	Vibrio parahaemolyticus	Vibrio	4	Vibrio2
2070543255	NZ_CP078682.1	Vibrio parahaemolyticus strain Colony34	Vibrio parahaemolyticus	Vibrio	4	Vibrio2
2070543780	NZ_CP078619.1	Vibrio parahaemolyticus strain Colony556	Vibrio parahaemolyticus	Vibrio	4	Vibrio2
2070544175	NZ_CP078620.1	Vibrio parahaemolyticus strain Colony556	Vibrio parahaemolyticus	Vibrio	4	Vibrio2
2070545772	NZ_CP078641.1	Vibrio parahaemolyticus strain Colony526	Vibrio parahaemolyticus	Vibrio	4	Vibrio2
2070545773	NZ_CP078611.1	Vibrio parahaemolyticus strain Colony601	Vibrio parahaemolyticus	Vibrio	4	Vibrio2
2070545774	NZ_CP078642.1	Vibrio parahaemolyticus strain Colony526	Vibrio parahaemolyticus	Vibrio	4	Vibrio2
2070545775	NZ_CP078612.1	Vibrio parahaemolyticus strain Colony601	Vibrio parahaemolyticus	Vibrio	4	Vibrio2
2070545776	NZ_CP078663.1	Vibrio parahaemolyticus strain Colony266	Vibrio parahaemolyticus	Vibrio	4	Vibrio2
2070545797	NZ_CP078664.1	Vibrio parahaemolyticus strain Colony266	Vibrio parahaemolyticus	Vibrio	4	Vibrio2
2070545932	NZ_CP078697.1	Vibrio parahaemolyticus strain Colony96	Vibrio parahaemolyticus	Vibrio	4	Vibrio2
2070545953	NZ_CP078698.1	Vibrio parahaemolyticus strain Colony96	Vibrio parahaemolyticus	Vibrio	4	Vibrio2
2070548540	NZ_CP078731.1	Vibrio parahaemolyticus strain Colony608	Vibrio parahaemolyticus	Vibrio	4	Vibrio2
2070548705	NZ_CP078732.1	Vibrio parahaemolyticus strain Colony608	Vibrio parahaemolyticus	Vibrio	4	Vibrio2
2070549323	NZ_CP078649.1	Vibrio parahaemolyticus strain Colony93	Vibrio parahaemolyticus	Vibrio	4	Vibrio2
2070549426	NZ_CP078650.1	Vibrio parahaemolyticus strain Colony93	Vibrio parahaemolyticus	Vibrio	4	Vibrio2
2070549648	NZ_CP078629.1	Vibrio parahaemolyticus strain Colony550	Vibrio parahaemolyticus	Vibrio	4	Vibrio2
2070549649	NZ_CP078630.1	Vibrio parahaemolyticus strain Colony550	Vibrio parahaemolyticus	Vibrio	4	Vibrio2
2070549650	NZ_CP078693.1	Vibrio parahaemolyticus strain Colony12	Vibrio parahaemolyticus	Vibrio	4	Vibrio2
2070549651	NZ_CP078694.1	Vibrio parahaemolyticus strain Colony12	Vibrio parahaemolyticus	Vibrio	4	Vibrio2
2070549653	NZ_CP078673.1	Vibrio parahaemolyticus strain Colony43	Vibrio parahaemolyticus	Vibrio	4	Vibrio2
2070549654	NZ_CP078674.1	Vibrio parahaemolyticus strain Colony43	Vibrio parahaemolyticus	Vibrio	4	Vibrio2
2070549655	NZ_CP078703.1	Vibrio parahaemolyticus strain Colony89	Vibrio parahaemolyticus	Vibrio	4	Vibrio2
2070549656	NZ_CP078704.1	Vibrio parahaemolyticus strain Colony89	Vibrio parahaemolyticus	Vibrio	4	Vibrio2
2070549657	NZ_CP078687.1	Vibrio parahaemolyticus strain Colony19	Vibrio parahaemolyticus	Vibrio	4	Vibrio2
2070549658	NZ_CP078688.1	Vibrio parahaemolyticus strain Colony19	Vibrio parahaemolyticus	Vibrio	4	Vibrio2
2070550152	NZ_CP078707.1	Vibrio parahaemolyticus strain Colony52	Vibrio parahaemolyticus	Vibrio	4	Vibrio2
2070550154	NZ_CP078708.1	Vibrio parahaemolyticus strain Colony52	Vibrio parahaemolyticus	Vibrio	4	Vibrio2
2070551195	NZ_CP078607.1	Vibrio parahaemolyticus strain Colony607	Vibrio parahaemolyticus	Vibrio	4	Vibrio2
2070551196	NZ_CP078608.1	Vibrio parahaemolyticus strain Colony607	Vibrio parahaemolyticus	Vibrio	4	Vibrio2
2070551197	NZ_CP078661.1	Vibrio parahaemolyticus strain Colony521	Vibrio parahaemolyticus	Vibrio	4	Vibrio2
2070551198	NZ_CP078662.1	Vibrio parahaemolyticus strain Colony521	Vibrio parahaemolyticus	Vibrio	4	Vibrio2
2070551202	NZ_CP078705.1	Vibrio parahaemolyticus strain Colony83	Vibrio parahaemolyticus	Vibrio	4	Vibrio2
2070551203	NZ_CP078706.1	Vibrio parahaemolyticus strain Colony83	Vibrio parahaemolyticus	Vibrio	4	Vibrio2
2070552892	NZ_CP078617.1	Vibrio parahaemolyticus strain Colony557	Vibrio parahaemolyticus	Vibrio	4	Vibrio2
2070552893	NZ_CP078618.1	Vibrio parahaemolyticus strain Colony557	Vibrio parahaemolyticus	Vibrio	4	Vibrio2
2070555530	NZ_CP078645.1	Vibrio parahaemolyticus strain Colony394	Vibrio parahaemolyticus	Vibrio	4	Vibrio2
2070555531	NZ_CP078646.1	Vibrio parahaemolyticus strain Colony394	Vibrio parahaemolyticus	Vibrio	4	Vibrio2
2070555532	NZ_CP078695.1	Vibrio parahaemolyticus strain Colony97	Vibrio parahaemolyticus	Vibrio	4	Vibrio2
2070555533	NZ_CP078696.1	Vibrio parahaemolyticus strain Colony97	Vibrio parahaemolyticus	Vibrio	4	Vibrio2
2070555769	NZ_CP078605.1	Vibrio parahaemolyticus strain Colony544	Vibrio parahaemolyticus	Vibrio	4	Vibrio2
2070555770	NZ_CP078606.1	Vibrio parahaemolyticus strain Colony544	Vibrio parahaemolyticus	Vibrio	4	Vibrio2
2070556040	NZ_CP078633.1	Vibrio parahaemolyticus strain Colony548	Vibrio parahaemolyticus	Vibrio	4	Vibrio2
2070556041	NZ_CP078634.1	Vibrio parahaemolyticus strain Colony548	Vibrio parahaemolyticus	Vibrio	4	Vibrio2
2070556197	NZ_CP078655.1	Vibrio parahaemolyticus strain Colony551	Vibrio parahaemolyticus	Vibrio	4	Vibrio2
2070556198	NZ_CP078656.1	Vibrio parahaemolyticus strain Colony551	Vibrio parahaemolyticus	Vibrio	4	Vibrio2
2070556199	NZ_CP078677.1	Vibrio parahaemolyticus strain Colony38	Vibrio parahaemolyticus	Vibrio	4	Vibrio2
2070556200	NZ_CP078678.1	Vibrio parahaemolyticus strain Colony38	Vibrio parahaemolyticus	Vibrio	4	Vibrio2
2070556201	NZ_CP078683.1	Vibrio parahaemolyticus strain Colony33	Vibrio parahaemolyticus	Vibrio	4	Vibrio2
2070556202	NZ_CP078684.1	Vibrio parahaemolyticus strain Colony33	Vibrio parahaemolyticus	Vibrio	4	Vibrio2
2070556454	NZ_CP078621.1	Vibrio parahaemolyticus strain Colony555	Vibrio parahaemolyticus	Vibrio	4	Vibrio2
2070556455	NZ_CP078622.1	Vibrio parahaemolyticus strain Colony555	Vibrio parahaemolyticus	Vibrio	4	Vibrio2
2070556537	NZ_CP078631.1	Vibrio parahaemolyticus strain Colony549	Vibrio parahaemolyticus	Vibrio	4	Vibrio2
2070556538	NZ_CP078632.1	Vibrio parahaemolyticus strain Colony549	Vibrio parahaemolyticus	Vibrio	4	Vibrio2
2070556539	NZ_CP078675.1	Vibrio parahaemolyticus strain Colony39	Vibrio parahaemolyticus	Vibrio	4	Vibrio2
2070556540	NZ_CP078676.1	Vibrio parahaemolyticus strain Colony39	Vibrio parahaemolyticus	Vibrio	4	Vibrio2
2070557560	NZ_CP078623.1	Vibrio parahaemolyticus strain Colony554	Vibrio parahaemolyticus	Vibrio	4	Vibrio2
2070557561	NZ_CP078624.1	Vibrio parahaemolyticus strain Colony554	Vibrio parahaemolyticus	Vibrio	4	Vibrio2
2070557562	NZ_CP078665.1	Vibrio parahaemolyticus strain Colony265	Vibrio parahaemolyticus	Vibrio	4	Vibrio2
2070557563	NZ_CP078666.1	Vibrio parahaemolyticus strain Colony265	Vibrio parahaemolyticus	Vibrio	4	Vibrio2
2070557564	NZ_CP078699.1	Vibrio parahaemolyticus strain Colony95	Vibrio parahaemolyticus	Vibrio	4	Vibrio2
2070557565	NZ_CP078700.1	Vibrio parahaemolyticus strain Colony95	Vibrio parahaemolyticus	Vibrio	4	Vibrio2
2070558768	NZ_CP078733.1	Vibrio parahaemolyticus strain Colony524	Vibrio parahaemolyticus	Vibrio	4	Vibrio2
2070558769	NZ_CP078734.1	Vibrio parahaemolyticus strain Colony524	Vibrio parahaemolyticus	Vibrio	4	Vibrio2
2073369355	NZ_CP074415.1	Vibrio parahaemolyticus strain 64	Vibrio parahaemolyticus	Vibrio	4	Vibrio2
2073369375	NZ_CP074416.1	Vibrio parahaemolyticus strain 64	Vibrio parahaemolyticus	Vibrio	4	Vibrio2
2103093814	NZ_CP083361.1	Vibrio parahaemolyticus strain 20-082E4	Vibrio parahaemolyticus	Vibrio	4	Vibrio2
2103093816	NZ_CP083362.1	Vibrio parahaemolyticus strain 20-082E4	Vibrio parahaemolyticus	Vibrio	4	Vibrio2
2189295670	NZ_CP068638.1	Vibrio parahaemolyticus strain VP120	Vibrio parahaemolyticus	Vibrio	4	Vibrio2
2189295675	NZ_CP068639.1	Vibrio parahaemolyticus strain VP120	Vibrio parahaemolyticus	Vibrio	4	Vibrio2
2189303295	NZ_CP068630.1	Vibrio parahaemolyticus strain TJ-20	Vibrio parahaemolyticus	Vibrio	4	Vibrio2
2189303299	NZ_CP068631.1	Vibrio parahaemolyticus strain TJ-20	Vibrio parahaemolyticus	Vibrio	4	Vibrio2
2189304084	NZ_CP068641.1	Vibrio parahaemolyticus strain VP157	Vibrio parahaemolyticus	Vibrio	4	Vibrio2
2189304085	NZ_CP068642.1	Vibrio parahaemolyticus strain VP157	Vibrio parahaemolyticus	Vibrio	4	Vibrio2
2189305034	NZ_CP068627.1	Vibrio parahaemolyticus strain LH80	Vibrio parahaemolyticus	Vibrio	4	Vibrio2
2189305105	NZ_CP068628.1	Vibrio parahaemolyticus strain LH80	Vibrio parahaemolyticus	Vibrio	4	Vibrio2
2189307790	NZ_CP068622.1	Vibrio parahaemolyticus strain LH24	Vibrio parahaemolyticus	Vibrio	4	Vibrio2
2189307791	NZ_CP068623.1	Vibrio parahaemolyticus strain LH24	Vibrio parahaemolyticus	Vibrio	4	Vibrio2
2189307914	NZ_CP068647.1	Vibrio parahaemolyticus strain TJ-187	Vibrio parahaemolyticus	Vibrio	4	Vibrio2
2189308072	NZ_CP068648.1	Vibrio parahaemolyticus strain TJ-187	Vibrio parahaemolyticus	Vibrio	4	Vibrio2
2189323919	NZ_CP068633.1	Vibrio parahaemolyticus strain VP17	Vibrio parahaemolyticus	Vibrio	4	Vibrio2
2189324017	NZ_CP068634.1	Vibrio parahaemolyticus strain VP17	Vibrio parahaemolyticus	Vibrio	4	Vibrio2
375262319	NC_016614.1	Vibrio sp. EJY3	Vibrio sp.	Vibrio	4	Vibrio2
375264031	NC_016613.1	Vibrio sp. EJY3	Vibrio sp.	Vibrio	4	Vibrio2
1215560091	NZ_CP022352.1	Vibrio sp. 2521-89	Vibrio sp.	Vibrio	3	Vibrio1
1215560092	NZ_CP022353.1	Vibrio sp. 2521-89	Vibrio sp.	Vibrio	3	Vibrio1
1473678531	NZ_CP028943.1	Vibrio sp. dhg	Vibrio sp.	Vibrio	4	Vibrio2
1473678735	NZ_CP028944.1	Vibrio sp. dhg	Vibrio sp.	Vibrio	4	Vibrio2
1770575662	NZ_CP045338.1	Vibrio sp. THAF190c	Vibrio sp.	Vibrio	4	Vibrio2
1770577300	NZ_CP045355.1	Vibrio sp. THAF64	Vibrio sp.	Vibrio	4	Vibrio2
1777700381	NZ_CP046065.1	Vibrio sp. THAF191d	Vibrio sp.	Vibrio	4	Vibrio2
1778531858	NZ_CP046162.1	Vibrio sp. THAF191c	Vibrio sp.	Vibrio	4	Vibrio2
1822842606	NZ_CP049913.1	Vibrio sp. HDW18	Vibrio sp.	Vibrio	3	Vibrio1
1994709323	NZ_CP060589.1	Vibrio sp. sp1	Vibrio sp.	Vibrio	4	Vibrio2
1994709326	NZ_CP060590.1	Vibrio sp. sp1	Vibrio sp.	Vibrio	4	Vibrio2
2035891540	NZ_HG992749.1	Vibrio sp. B1FLJ16	Vibrio sp.	Vibrio	4	Vibrio2
2035891648	NZ_HG992750.1	Vibrio sp. B1FLJ16	Vibrio sp.	Vibrio	4	Vibrio2
2035894917	NZ_HG992758.1	Vibrio sp. B1FLJ16 isolate B1REV17	Vibrio sp.	Vibrio	4	Vibrio2
2035894959	NZ_HG992759.1	Vibrio sp. B1FLJ16 isolate B1REV17	Vibrio sp.	Vibrio	4	Vibrio2
2037109480	NZ_HG992751.1	Vibrio sp. B1FIG11 isolate LMG10946-nano	Vibrio sp.	Vibrio	4	Vibrio2
2037109481	NZ_HG992752.1	Vibrio sp. B1FIG11 isolate LMG10946-nano	Vibrio sp.	Vibrio	4	Vibrio2
2041092870	NZ_HG992742.1	Vibrio sp. B1ASS3	Vibrio sp.	Vibrio	4	Vibrio2
2041092871	NZ_HG992743.1	Vibrio sp. B1ASS3	Vibrio sp.	Vibrio	4	Vibrio2
2091922069	NZ_CP063199.1	Vibrio sp. SCSIO 43132	Vibrio sp.	Vibrio	3	Vibrio1
2091922432	NZ_CP063200.1	Vibrio sp. SCSIO 43132	Vibrio sp.	Vibrio	3	Vibrio1
2102631834	NZ_HG992745.1	Vibrio sp. B1REV9	Vibrio sp.	Vibrio	4	Vibrio2
2102911884	NZ_HG992755.1	Vibrio sp. B1FIG11	Vibrio sp.	Vibrio	4	Vibrio2
2102912333	NZ_HG992756.1	Vibrio sp. B1FIG11	Vibrio sp.	Vibrio	4	Vibrio2
107098994	NZ_AAQW01000001.1	Pseudomonas aeruginosa PACS2	Pseudomonas aeruginosa	Pseudomonas	5	Pseudomonas1
110645304	NC_002516.2	Pseudomonas aeruginosa PAO1	Pseudomonas aeruginosa	Pseudomonas	5	Pseudomonas1
116048575	NC_008463.1	Pseudomonas aeruginosa UCBPP-PA14	Pseudomonas aeruginosa	Pseudomonas	5	Pseudomonas1
152983466	NC_009656.1	Pseudomonas aeruginosa PA7	Pseudomonas aeruginosa	Pseudomonas	5	Pseudomonas1
218888746	NC_011770.1	Pseudomonas aeruginosa LESB58	Pseudomonas aeruginosa	Pseudomonas	5	Pseudomonas1
313112493	NZ_CM001020.1	Pseudomonas aeruginosa 39016	Pseudomonas aeruginosa	Pseudomonas	5	Pseudomonas1
386056071	NC_017548.1	Pseudomonas aeruginosa M18	Pseudomonas aeruginosa	Pseudomonas	5	Pseudomonas1
386062973	NC_017549.1	Pseudomonas aeruginosa NCGM2.S1	Pseudomonas aeruginosa	Pseudomonas	5	Pseudomonas1
392981410	NC_018080.1	Pseudomonas aeruginosa DK2	Pseudomonas aeruginosa	Pseudomonas	5	Pseudomonas1
478476202	NC_020912.1	Pseudomonas aeruginosa B136-33	Pseudomonas aeruginosa	Pseudomonas	5	Pseudomonas1
485462089	NZ_AFXJ01000001.1	Pseudomonas aeruginosa 19BR	Pseudomonas aeruginosa	Pseudomonas	5	Pseudomonas1
485462091	NZ_AFXK01000001.1	Pseudomonas aeruginosa 213BR	Pseudomonas aeruginosa	Pseudomonas	5	Pseudomonas1
514407635	NC_021577.1	Pseudomonas aeruginosa RP73	Pseudomonas aeruginosa	Pseudomonas	5	Pseudomonas1
558665962	NC_022806.1	Pseudomonas aeruginosa PA1R	Pseudomonas aeruginosa	Pseudomonas	5	Pseudomonas1
564949884	NC_023019.1	Pseudomonas aeruginosa MTB-1	Pseudomonas aeruginosa	Pseudomonas	5	Pseudomonas1
568151185	NC_023066.1	Pseudomonas aeruginosa LES431	Pseudomonas aeruginosa	Pseudomonas	5	Pseudomonas1
568306739	NC_023149.1	Pseudomonas aeruginosa SCV20265	Pseudomonas aeruginosa	Pseudomonas	5	Pseudomonas1
643382501	NZ_CP006985.1	Pseudomonas aeruginosa LESlike4	Pseudomonas aeruginosa	Pseudomonas	5	Pseudomonas1
643620356	NZ_CP006980.1	Pseudomonas aeruginosa LESlike5	Pseudomonas aeruginosa	Pseudomonas	5	Pseudomonas1
643904023	NZ_CP006982.1	Pseudomonas aeruginosa LES400	Pseudomonas aeruginosa	Pseudomonas	5	Pseudomonas1
644018811	NZ_CP006981.1	Pseudomonas aeruginosa LESlike7	Pseudomonas aeruginosa	Pseudomonas	5	Pseudomonas1
644643714	NZ_CP006983.1	Pseudomonas aeruginosa LESB65	Pseudomonas aeruginosa	Pseudomonas	5	Pseudomonas1
651853778	NC_022360.1	Pseudomonas aeruginosa c7447m	Pseudomonas aeruginosa	Pseudomonas	5	Pseudomonas1
651859679	NC_022361.1	Pseudomonas aeruginosa PAO581	Pseudomonas aeruginosa	Pseudomonas	5	Pseudomonas1
651868701	NC_022591.1	Pseudomonas aeruginosa PAO1-VE2	Pseudomonas aeruginosa	Pseudomonas	5	Pseudomonas1
651874622	NC_022594.1	Pseudomonas aeruginosa PAO1-VE13	Pseudomonas aeruginosa	Pseudomonas	5	Pseudomonas1
740618726	NZ_CP008749.1	Pseudomonas aeruginosa PAO1H2O	Pseudomonas aeruginosa	Pseudomonas	5	Pseudomonas1
740619624	NZ_CP007224.1	Pseudomonas aeruginosa PA96	Pseudomonas aeruginosa	Pseudomonas	5	Pseudomonas1
749293516	NZ_CP008739.1	Pseudomonas aeruginosa VRFPA04	Pseudomonas aeruginosa	Pseudomonas	5	Pseudomonas1
749293648	NZ_CP006984.1	Pseudomonas aeruginosa LESlike1 sequence	Pseudomonas aeruginosa	Pseudomonas	5	Pseudomonas1
751912329	NZ_CP010555.1	Pseudomonas aeruginosa strain FRD1	Pseudomonas aeruginosa	Pseudomonas	5	Pseudomonas1
754796594	NZ_HG974234.1	Pseudomonas aeruginosa strain PSE305	Pseudomonas aeruginosa	Pseudomonas	5	Pseudomonas1
759447752	NZ_CP007147.1	Pseudomonas aeruginosa YL84	Pseudomonas aeruginosa	Pseudomonas	5	Pseudomonas1
779958137	NZ_AP014622.1	Pseudomonas aeruginosa strain NCGM1900	Pseudomonas aeruginosa	Pseudomonas	5	Pseudomonas1
780007407	NZ_AP014646.1	Pseudomonas aeruginosa strain NCGM1984	Pseudomonas aeruginosa	Pseudomonas	5	Pseudomonas1
817611511	NZ_CP011317.1	Pseudomonas aeruginosa strain Carb01 63	Pseudomonas aeruginosa	Pseudomonas	5	Pseudomonas1
819377146	NZ_CP011369.1	Pseudomonas aeruginosa strain S04 90	Pseudomonas aeruginosa	Pseudomonas	5	Pseudomonas1
872498167	NZ_CP012001.1	Pseudomonas aeruginosa DSM 50071 = NBRC 12689 strain DSM 50071	Pseudomonas aeruginosa	Pseudomonas	5	Pseudomonas1
898321271	NZ_CP012066.1	Pseudomonas aeruginosa strain F9676	Pseudomonas aeruginosa	Pseudomonas	5	Pseudomonas1
902970321	NZ_CP007399.1	Pseudomonas aeruginosa strain F22031	Pseudomonas aeruginosa	Pseudomonas	5	Pseudomonas1
928796126	NZ_CP012679.1	Pseudomonas aeruginosa strain PA1RG	Pseudomonas aeruginosa	Pseudomonas	5	Pseudomonas1
930174200	NC_022808.2	Pseudomonas aeruginosa PA1	Pseudomonas aeruginosa	Pseudomonas	5	Pseudomonas1
960283550	NZ_LN831024.1	Pseudomonas aeruginosa strain NCTC10332	Pseudomonas aeruginosa	Pseudomonas	5	Pseudomonas1
960295491	NZ_LN871187.1	Pseudomonas aeruginosa strain PAO1_Orsay	Pseudomonas aeruginosa	Pseudomonas	5	Pseudomonas1
961421427	CP013144.1	Pseudomonas aeruginosa strain Cu1510	Pseudomonas aeruginosa	Pseudomonas	5	Pseudomonas1
970955512	NZ_CP013696.1	Pseudomonas aeruginosa strain 12-4-4(59)	Pseudomonas aeruginosa	Pseudomonas	5	Pseudomonas1
976151597	NZ_CP008861.1	Pseudomonas aeruginosa strain H47921	Pseudomonas aeruginosa	Pseudomonas	5	Pseudomonas1
976159261	NZ_CP008867.1	Pseudomonas aeruginosa strain T52373	Pseudomonas aeruginosa	Pseudomonas	5	Pseudomonas1
976160926	NZ_CP008868.1	Pseudomonas aeruginosa strain T63266	Pseudomonas aeruginosa	Pseudomonas	5	Pseudomonas1
976160934	NZ_CP008863.1	Pseudomonas aeruginosa strain M37351	Pseudomonas aeruginosa	Pseudomonas	5	Pseudomonas1
976161073	NZ_CP008857.1	Pseudomonas aeruginosa strain F30658	Pseudomonas aeruginosa	Pseudomonas	5	Pseudomonas1
979840119	NZ_CP013989.1	Pseudomonas aeruginosa strain USDA-ARS-USMARC-41639	Pseudomonas aeruginosa	Pseudomonas	5	Pseudomonas1
983470178	NZ_CP013245.1	Pseudomonas aeruginosa strain VA-134	Pseudomonas aeruginosa	Pseudomonas	5	Pseudomonas1
983584575	NZ_CP013993.1	Pseudomonas aeruginosa DHS01 strain DH01	Pseudomonas aeruginosa	Pseudomonas	5	Pseudomonas1
984670912	NZ_CP008873.1	Pseudomonas aeruginosa strain F9670	Pseudomonas aeruginosa	Pseudomonas	5	Pseudomonas1
985613471	NZ_AP014839.1	Pseudomonas aeruginosa strain 8380	Pseudomonas aeruginosa	Pseudomonas	5	Pseudomonas1
985613865	NZ_AP017302.1	Pseudomonas aeruginosa strain IOMTU 133	Pseudomonas aeruginosa	Pseudomonas	5	Pseudomonas1
985614099	NZ_AP014651.1	Pseudomonas aeruginosa strain NCGM257	Pseudomonas aeruginosa	Pseudomonas	5	Pseudomonas1
1002357942	CP014210.1	Pseudomonas aeruginosa strain KU, partial genome	Pseudomonas aeruginosa	Pseudomonas	5	Pseudomonas1
1015912017	NZ_CP014948.1	Pseudomonas aeruginosa strain N17-1	Pseudomonas aeruginosa	Pseudomonas	5	Pseudomonas1
1017222811	NZ_CP015117.1	Pseudomonas aeruginosa strain ATCC 27853	Pseudomonas aeruginosa	Pseudomonas	5	Pseudomonas1
1023037698	NZ_CP015377.1	Pseudomonas aeruginosa strain BAMCPA07-48	Pseudomonas aeruginosa	Pseudomonas	5	Pseudomonas1
1035816055	NZ_CP015877.1	Pseudomonas aeruginosa SJTD-1	Pseudomonas aeruginosa	Pseudomonas	5	Pseudomonas1
1042709213	NZ_CP016214.1	Pseudomonas aeruginosa strain PA121617	Pseudomonas aeruginosa	Pseudomonas	5	Pseudomonas1
1045493653	NZ_CP011857.1	Pseudomonas aeruginosa strain ATCC 27853	Pseudomonas aeruginosa	Pseudomonas	5	Pseudomonas1
1063294332	NZ_CP012583.1	Pseudomonas aeruginosa strain PA_D22	Pseudomonas aeruginosa	Pseudomonas	5	Pseudomonas1
1063301749	NZ_CP017099.1	Pseudomonas aeruginosa strain DN1	Pseudomonas aeruginosa	Pseudomonas	5	Pseudomonas1
1063301753	NZ_CP012585.1	Pseudomonas aeruginosa strain PA_D1	Pseudomonas aeruginosa	Pseudomonas	5	Pseudomonas1
1063301756	NZ_CP012581.1	Pseudomonas aeruginosa strain PA_D16	Pseudomonas aeruginosa	Pseudomonas	5	Pseudomonas1
1063301840	NZ_CP012579.1	Pseudomonas aeruginosa strain PA_D5	Pseudomonas aeruginosa	Pseudomonas	5	Pseudomonas1
1063301846	NZ_CP012582.1	Pseudomonas aeruginosa strain PA_D21	Pseudomonas aeruginosa	Pseudomonas	5	Pseudomonas1
1063301890	NZ_CP012584.1	Pseudomonas aeruginosa strain PA_D25	Pseudomonas aeruginosa	Pseudomonas	5	Pseudomonas1
1063301891	NZ_CP012580.1	Pseudomonas aeruginosa strain PA_D9	Pseudomonas aeruginosa	Pseudomonas	5	Pseudomonas1
1063301983	NZ_CP012578.1	Pseudomonas aeruginosa strain PA_D2	Pseudomonas aeruginosa	Pseudomonas	5	Pseudomonas1
1068537777	NZ_CP017149.1	Pseudomonas aeruginosa strain ATCC 15692	Pseudomonas aeruginosa	Pseudomonas	5	Pseudomonas1
1073100443	NZ_CP017353.1	Pseudomonas aeruginosa strain FA-HZ1	Pseudomonas aeruginosa	Pseudomonas	5	Pseudomonas1
1073614711	NZ_LT608330.1	Pseudomonas aeruginosa isolate PA14Or_reads	Pseudomonas aeruginosa	Pseudomonas	5	Pseudomonas1
1087989078	NZ_CP015003.1	Pseudomonas aeruginosa strain PA11803	Pseudomonas aeruginosa	Pseudomonas	5	Pseudomonas1
1087989186	NZ_CP015002.1	Pseudomonas aeruginosa strain PA8281	Pseudomonas aeruginosa	Pseudomonas	5	Pseudomonas1
1087989559	NZ_CP015001.1	Pseudomonas aeruginosa strain PA1088	Pseudomonas aeruginosa	Pseudomonas	5	Pseudomonas1
1100995357	NZ_CP014999.1	Pseudomonas aeruginosa strain PA7790	Pseudomonas aeruginosa	Pseudomonas	5	Pseudomonas1
1102027948	NZ_CP017969.1	Pseudomonas aeruginosa isolate B10W	Pseudomonas aeruginosa	Pseudomonas	5	Pseudomonas1
1103304006	NZ_CP013113.1	Pseudomonas aeruginosa strain Paer4_119	Pseudomonas aeruginosa	Pseudomonas	5	Pseudomonas1
1122256364	NZ_CP013478.1	Pseudomonas aeruginosa strain SCVJan	Pseudomonas aeruginosa	Pseudomonas	5	Pseudomonas1
1122267350	NZ_CP013479.1	Pseudomonas aeruginosa strain NHmuc	Pseudomonas aeruginosa	Pseudomonas	5	Pseudomonas1
1122268535	NZ_CP013477.1	Pseudomonas aeruginosa strain SCVFeb	Pseudomonas aeruginosa	Pseudomonas	5	Pseudomonas1
1141196634	NZ_LT673656.1	Pseudomonas aeruginosa isolate PcyII-10	Pseudomonas aeruginosa	Pseudomonas	5	Pseudomonas1
1172565747	NZ_CP014866.1	Pseudomonas aeruginosa strain PA_154197	Pseudomonas aeruginosa	Pseudomonas	5	Pseudomonas1
1178621777	NZ_CP016955.1	Pseudomonas aeruginosa strain RIVM-EMC2982	Pseudomonas aeruginosa	Pseudomonas	5	Pseudomonas1
1178632731	NZ_CP020603.1	Pseudomonas aeruginosa strain E6130952	Pseudomonas aeruginosa	Pseudomonas	5	Pseudomonas1
1180776385	NZ_CP008866.2	Pseudomonas aeruginosa strain T38079	Pseudomonas aeruginosa	Pseudomonas	5	Pseudomonas1
1180883231	NZ_CP008856.2	Pseudomonas aeruginosa strain F23197	Pseudomonas aeruginosa	Pseudomonas	5	Pseudomonas1
1180909008	NZ_CP008864.2	Pseudomonas aeruginosa strain W60856	Pseudomonas aeruginosa	Pseudomonas	5	Pseudomonas1
1180922696	NZ_CP008871.2	Pseudomonas aeruginosa strain W45909	Pseudomonas aeruginosa	Pseudomonas	5	Pseudomonas1
1180935214	NZ_CP008862.2	Pseudomonas aeruginosa strain M1608	Pseudomonas aeruginosa	Pseudomonas	5	Pseudomonas1
1180937157	NZ_CP008872.2	Pseudomonas aeruginosa strain X78812	Pseudomonas aeruginosa	Pseudomonas	5	Pseudomonas1
1180938206	NZ_CP008859.2	Pseudomonas aeruginosa strain H5708	Pseudomonas aeruginosa	Pseudomonas	5	Pseudomonas1
1180962752	NZ_CP008869.2	Pseudomonas aeruginosa strain W16407	Pseudomonas aeruginosa	Pseudomonas	5	Pseudomonas1
1180963749	NZ_CP008870.2	Pseudomonas aeruginosa strain W36662	Pseudomonas aeruginosa	Pseudomonas	5	Pseudomonas1
1180964731	NZ_CP008860.2	Pseudomonas aeruginosa strain H27930	Pseudomonas aeruginosa	Pseudomonas	5	Pseudomonas1
1181503808	NZ_CP008865.2	Pseudomonas aeruginosa strain S86968	Pseudomonas aeruginosa	Pseudomonas	5	Pseudomonas1
1184735058	NZ_CP020704.1	Pseudomonas aeruginosa strain PASGNDM699	Pseudomonas aeruginosa	Pseudomonas	5	Pseudomonas1
1184752687	NZ_CP020703.1	Pseudomonas aeruginosa strain PASGNDM345	Pseudomonas aeruginosa	Pseudomonas	5	Pseudomonas1
1186208416	NZ_CP008858.2	Pseudomonas aeruginosa strain F63912	Pseudomonas aeruginosa	Pseudomonas	5	Pseudomonas1
1189708277	NZ_CP015647.1	Pseudomonas aeruginosa strain M8A1	Pseudomonas aeruginosa	Pseudomonas	5	Pseudomonas1
1189708834	NZ_CP015650.1	Pseudomonas aeruginosa strain Pb18	Pseudomonas aeruginosa	Pseudomonas	5	Pseudomonas1
1189721911	NZ_CP015648.1	Pseudomonas aeruginosa strain M8A4	Pseudomonas aeruginosa	Pseudomonas	5	Pseudomonas1
1205112615	NZ_LN870292.1	Pseudomonas aeruginosa DK1 substr. NH57388A	Pseudomonas aeruginosa	Pseudomonas	5	Pseudomonas1
1207076755	NZ_CP021775.1	Pseudomonas aeruginosa strain Pa58	Pseudomonas aeruginosa	Pseudomonas	5	Pseudomonas1
1207086767	NZ_CP021774.1	Pseudomonas aeruginosa strain Pa124	Pseudomonas aeruginosa	Pseudomonas	5	Pseudomonas1
1207640446	NZ_CP015649.1	Pseudomonas aeruginosa strain M28A1	Pseudomonas aeruginosa	Pseudomonas	5	Pseudomonas1
1208978260	NZ_LT883143.1	Pseudomonas aeruginosa C-NN2 isolate early isolate NN2 (clone C)	Pseudomonas aeruginosa	Pseudomonas	5	Pseudomonas1
1209865708	NZ_CP022002.1	Pseudomonas aeruginosa strain Pa1242	Pseudomonas aeruginosa	Pseudomonas	5	Pseudomonas1
1209898447	NZ_CP021999.1	Pseudomonas aeruginosa strain Pa84	Pseudomonas aeruginosa	Pseudomonas	5	Pseudomonas1
1209941374	NZ_CP022000.1	Pseudomonas aeruginosa strain Pa127	Pseudomonas aeruginosa	Pseudomonas	5	Pseudomonas1
1211947559	NZ_CP022001.1	Pseudomonas aeruginosa strain Pa1207	Pseudomonas aeruginosa	Pseudomonas	5	Pseudomonas1
1214912585	NZ_CP017293.1	Pseudomonas aeruginosa strain PA83	Pseudomonas aeruginosa	Pseudomonas	5	Pseudomonas1
1219672778	NZ_CP019338.1	Pseudomonas aeruginosa strain L10	Pseudomonas aeruginosa	Pseudomonas	5	Pseudomonas1
1227408438	NZ_CP022526.1	Pseudomonas aeruginosa strain Ocean-1155	Pseudomonas aeruginosa	Pseudomonas	5	Pseudomonas1
1227408440	NZ_CP022525.1	Pseudomonas aeruginosa strain Ocean-1175	Pseudomonas aeruginosa	Pseudomonas	5	Pseudomonas1
1242929755	NZ_CP020659.1	Pseudomonas aeruginosa PAK	Pseudomonas aeruginosa	Pseudomonas	5	Pseudomonas1
1252880845	NZ_CP017306.1	Pseudomonas aeruginosa strain PA_150577	Pseudomonas aeruginosa	Pseudomonas	5	Pseudomonas1
1275821142	NZ_CP024477.1	Pseudomonas aeruginosa strain 12939	Pseudomonas aeruginosa	Pseudomonas	5	Pseudomonas1
1300072873	NZ_CP025049.1	Pseudomonas aeruginosa strain PB369	Pseudomonas aeruginosa	Pseudomonas	5	Pseudomonas1
1300226755	NZ_CP025050.1	Pseudomonas aeruginosa strain PB368	Pseudomonas aeruginosa	Pseudomonas	5	Pseudomonas1
1301685643	NZ_CP025051.1	Pseudomonas aeruginosa strain PB353	Pseudomonas aeruginosa	Pseudomonas	5	Pseudomonas1
1301685650	NZ_CP025053.1	Pseudomonas aeruginosa strain PB354	Pseudomonas aeruginosa	Pseudomonas	5	Pseudomonas1
1317404280	NZ_LT969520.1	Pseudomonas aeruginosa isolate RW109	Pseudomonas aeruginosa	Pseudomonas	5	Pseudomonas1
1352969294	NZ_CP026680.1	Pseudomonas aeruginosa strain F5677	Pseudomonas aeruginosa	Pseudomonas	5	Pseudomonas1
1358061161	NZ_CP027165.1	Pseudomonas aeruginosa strain AR_0360	Pseudomonas aeruginosa	Pseudomonas	5	Pseudomonas1
1358094835	NZ_CP027171.1	Pseudomonas aeruginosa strain AR_0354	Pseudomonas aeruginosa	Pseudomonas	5	Pseudomonas1
1358103222	NZ_CP027174.1	Pseudomonas aeruginosa strain AR_0230	Pseudomonas aeruginosa	Pseudomonas	5	Pseudomonas1
1358103338	NZ_CP027166.1	Pseudomonas aeruginosa strain AR_0357	Pseudomonas aeruginosa	Pseudomonas	5	Pseudomonas1
1358103690	NZ_CP027169.1	Pseudomonas aeruginosa strain AR_0356	Pseudomonas aeruginosa	Pseudomonas	5	Pseudomonas1
1358103725	NZ_CP027172.1	Pseudomonas aeruginosa strain AR_0353	Pseudomonas aeruginosa	Pseudomonas	5	Pseudomonas1
1360830268	NZ_CP027538.1	Pseudomonas aeruginosa strain AR_0095	Pseudomonas aeruginosa	Pseudomonas	5	Pseudomonas1
1373615063	NZ_CP020560.1	Pseudomonas aeruginosa strain CR1	Pseudomonas aeruginosa	Pseudomonas	5	Pseudomonas1
1374263467	NZ_CP028162.1	Pseudomonas aeruginosa strain MRSN12280	Pseudomonas aeruginosa	Pseudomonas	5	Pseudomonas1
1382333693	NZ_CP023316.1	Pseudomonas aeruginosa strain PPF-1	Pseudomonas aeruginosa	Pseudomonas	5	Pseudomonas1
1383428256	NZ_CP028917.1	Pseudomonas aeruginosa strain JB2	Pseudomonas aeruginosa	Pseudomonas	5	Pseudomonas1
1385123436	NZ_CP029148.1	Pseudomonas aeruginosa strain AR_0440	Pseudomonas aeruginosa	Pseudomonas	5	Pseudomonas1
1385123680	NZ_CP029088.1	Pseudomonas aeruginosa strain AR445	Pseudomonas aeruginosa	Pseudomonas	5	Pseudomonas1
1385131456	NZ_CP029089.1	Pseudomonas aeruginosa strain AR444	Pseudomonas aeruginosa	Pseudomonas	5	Pseudomonas1
1385137701	NZ_CP029093.1	Pseudomonas aeruginosa strain AR441	Pseudomonas aeruginosa	Pseudomonas	5	Pseudomonas1
1385137705	NZ_CP029090.1	Pseudomonas aeruginosa strain AR442	Pseudomonas aeruginosa	Pseudomonas	5	Pseudomonas1
1385140877	NZ_CP029097.1	Pseudomonas aeruginosa strain AR439	Pseudomonas aeruginosa	Pseudomonas	5	Pseudomonas1
1385140925	NZ_CP029147.1	Pseudomonas aeruginosa strain AR_0443	Pseudomonas aeruginosa	Pseudomonas	5	Pseudomonas1
1398135150	NZ_CP023255.1	Pseudomonas aeruginosa strain CCUG 70744	Pseudomonas aeruginosa	Pseudomonas	5	Pseudomonas1
1398147678	NZ_CP029660.1	Pseudomonas aeruginosa strain AR_0446	Pseudomonas aeruginosa	Pseudomonas	5	Pseudomonas1
1402704449	NZ_CP029745.1	Pseudomonas aeruginosa strain AR_0110	Pseudomonas aeruginosa	Pseudomonas	5	Pseudomonas1
1402708338	NZ_CP029707.1	Pseudomonas aeruginosa strain K34-7	Pseudomonas aeruginosa	Pseudomonas	5	Pseudomonas1
1403711559	LS483497.1	Pseudomonas aeruginosa strain NCTC9433	Pseudomonas aeruginosa	Pseudomonas	5	Pseudomonas1
1423818902	NZ_CP030351.1	Pseudomonas aeruginosa strain AR_460	Pseudomonas aeruginosa	Pseudomonas	5	Pseudomonas1
1423907042	NZ_CP030327.1	Pseudomonas aeruginosa strain AR_458	Pseudomonas aeruginosa	Pseudomonas	5	Pseudomonas1
1423919504	NZ_CP030328.1	Pseudomonas aeruginosa strain AR_455	Pseudomonas aeruginosa	Pseudomonas	5	Pseudomonas1
1430540435	NZ_CP030861.1	Pseudomonas aeruginosa strain HS9	Pseudomonas aeruginosa	Pseudomonas	5	Pseudomonas1
1447473798	NZ_CP030913.1	Pseudomonas aeruginosa strain Y89	Pseudomonas aeruginosa	Pseudomonas	5	Pseudomonas1
1447475664	NZ_CP030912.1	Pseudomonas aeruginosa strain Y82	Pseudomonas aeruginosa	Pseudomonas	5	Pseudomonas1
1447487499	NZ_CP030910.1	Pseudomonas aeruginosa strain Y31	Pseudomonas aeruginosa	Pseudomonas	5	Pseudomonas1
1463503454	NZ_CP030911.1	Pseudomonas aeruginosa strain Y71	Pseudomonas aeruginosa	Pseudomonas	5	Pseudomonas1
1468436717	NZ_CP031660.1	Pseudomonas aeruginosa strain PABL017	Pseudomonas aeruginosa	Pseudomonas	5	Pseudomonas1
1468440619	NZ_CP031659.1	Pseudomonas aeruginosa strain PABL012	Pseudomonas aeruginosa	Pseudomonas	5	Pseudomonas1
1468518128	NZ_CP029605.1	Pseudomonas aeruginosa strain 24Pae112	Pseudomonas aeruginosa	Pseudomonas	5	Pseudomonas1
1477501930	NZ_CP012901.1	Pseudomonas aeruginosa strain N15-01092	Pseudomonas aeruginosa	Pseudomonas	5	Pseudomonas1
1477770217	NZ_CP032257.1	Pseudomonas aeruginosa strain AR_0111	Pseudomonas aeruginosa	Pseudomonas	5	Pseudomonas1
1487897444	NZ_CP028584.2	Pseudomonas aeruginosa strain WCHPA075019	Pseudomonas aeruginosa	Pseudomonas	5	Pseudomonas1
1492888516	NZ_CP032761.1	Pseudomonas aeruginosa strain 268	Pseudomonas aeruginosa	Pseudomonas	5	Pseudomonas1
1493361341	NZ_CP032552.1	Pseudomonas aeruginosa strain PA34	Pseudomonas aeruginosa	Pseudomonas	5	Pseudomonas1
1493913217	NZ_CP030075.1	Pseudomonas aeruginosa strain 6762	Pseudomonas aeruginosa	Pseudomonas	5	Pseudomonas1
1497384849	CP033084.1	Pseudomonas aeruginosa strain PA-3	Pseudomonas aeruginosa	Pseudomonas	5	Pseudomonas1
1509762642	CP033432.1	Pseudomonas aeruginosa strain BA15561	Pseudomonas aeruginosa	Pseudomonas	5	Pseudomonas1
1511304067	NZ_CP033439.1	Pseudomonas aeruginosa strain SP4528	Pseudomonas aeruginosa	Pseudomonas	5	Pseudomonas1
1520155765	NZ_CP033843.1	Pseudomonas aeruginosa strain FDAARGOS_501	Pseudomonas aeruginosa	Pseudomonas	5	Pseudomonas1
1520156871	NZ_CP033832.1	Pseudomonas aeruginosa strain FDAARGOS_505	Pseudomonas aeruginosa	Pseudomonas	5	Pseudomonas1
1520162124	NZ_CP033686.1	Pseudomonas aeruginosa strain H25883	Pseudomonas aeruginosa	Pseudomonas	5	Pseudomonas1
1520202468	NZ_CP033835.1	Pseudomonas aeruginosa strain FDAARGOS_570	Pseudomonas aeruginosa	Pseudomonas	5	Pseudomonas1
1520369058	NZ_CP033685.1	Pseudomonas aeruginosa strain H26023	Pseudomonas aeruginosa	Pseudomonas	5	Pseudomonas1
1520407432	NZ_CP033771.1	Pseudomonas aeruginosa strain FDAARGOS_532	Pseudomonas aeruginosa	Pseudomonas	5	Pseudomonas1
1520440032	NZ_CP033833.1	Pseudomonas aeruginosa strain FDAARGOS_571	Pseudomonas aeruginosa	Pseudomonas	5	Pseudomonas1
1520688019	NZ_CP033684.1	Pseudomonas aeruginosa strain H26027	Pseudomonas aeruginosa	Pseudomonas	5	Pseudomonas1
1520688306	NZ_CP029713.1	Pseudomonas aeruginosa strain BH9	Pseudomonas aeruginosa	Pseudomonas	5	Pseudomonas1
1532539826	NZ_LR130531.1	Pseudomonas aeruginosa isolate paerg004	Pseudomonas aeruginosa	Pseudomonas	5	Pseudomonas1
1532540134	NZ_LR130533.1	Pseudomonas aeruginosa isolate paerg009	Pseudomonas aeruginosa	Pseudomonas	5	Pseudomonas1
1532545878	NZ_LR130534.1	Pseudomonas aeruginosa isolate paerg005	Pseudomonas aeruginosa	Pseudomonas	5	Pseudomonas1
1532546010	NZ_LR130535.1	Pseudomonas aeruginosa isolate paerg011	Pseudomonas aeruginosa	Pseudomonas	5	Pseudomonas1
1532546162	NZ_LR130537.1	Pseudomonas aeruginosa isolate paerg012	Pseudomonas aeruginosa	Pseudomonas	5	Pseudomonas1
1532570814	NZ_LR130527.1	Pseudomonas aeruginosa isolate paerg002	Pseudomonas aeruginosa	Pseudomonas	5	Pseudomonas1
1532590649	NZ_LR130528.1	Pseudomonas aeruginosa isolate paerg000	Pseudomonas aeruginosa	Pseudomonas	5	Pseudomonas1
1534505946	NZ_LR130530.1	Pseudomonas aeruginosa isolate paerg003	Pseudomonas aeruginosa	Pseudomonas	5	Pseudomonas1
1534505949	NZ_LR130536.1	Pseudomonas aeruginosa isolate paerg010	Pseudomonas aeruginosa	Pseudomonas	5	Pseudomonas1
1537020888	CP034368.1	Pseudomonas aeruginosa strain B41226	Pseudomonas aeruginosa	Pseudomonas	5	Pseudomonas1
1537772162	CP034435.1	Pseudomonas aeruginosa strain B14130	Pseudomonas aeruginosa	Pseudomonas	5	Pseudomonas1
1537778498	CP034434.1	Pseudomonas aeruginosa strain SP2230	Pseudomonas aeruginosa	Pseudomonas	5	Pseudomonas1
1538821938	NZ_CP034354.1	Pseudomonas aeruginosa strain IMP-13	Pseudomonas aeruginosa	Pseudomonas	5	Pseudomonas1
1543121833	NZ_CP034436.1	Pseudomonas aeruginosa strain B17932	Pseudomonas aeruginosa	Pseudomonas	5	Pseudomonas1
1543559084	NZ_CP034429.1	Pseudomonas aeruginosa strain GIMC5015:PAKB6	Pseudomonas aeruginosa	Pseudomonas	5	Pseudomonas1
1545231410	NZ_LR134309.1	Pseudomonas aeruginosa strain NCTC12903	Pseudomonas aeruginosa	Pseudomonas	5	Pseudomonas1
1545265845	NZ_LR134342.1	Pseudomonas aeruginosa strain NCTC10728	Pseudomonas aeruginosa	Pseudomonas	5	Pseudomonas1
1545281938	NZ_LR134308.1	Pseudomonas aeruginosa strain NCTC11445	Pseudomonas aeruginosa	Pseudomonas	5	Pseudomonas1
1545285449	NZ_LR134330.1	Pseudomonas aeruginosa strain NCTC13715	Pseudomonas aeruginosa	Pseudomonas	5	Pseudomonas1
1547400964	NZ_CP034409.1	Pseudomonas aeruginosa strain SP4527	Pseudomonas aeruginosa	Pseudomonas	5	Pseudomonas1
1553103300	NZ_CP034430.1	Pseudomonas aeruginosa strain GIMC5016:PA1840	Pseudomonas aeruginosa	Pseudomonas	5	Pseudomonas1
1553508345	NZ_CP022478.1	Pseudomonas aeruginosa strain LW	Pseudomonas aeruginosa	Pseudomonas	5	Pseudomonas1
1562274497	NZ_CP032126.1	Pseudomonas aeruginosa strain PAO1161	Pseudomonas aeruginosa	Pseudomonas	5	Pseudomonas1
1569296662	NZ_CP034369.1	Pseudomonas aeruginosa strain SP4371	Pseudomonas aeruginosa	Pseudomonas	5	Pseudomonas1
1575626887	NZ_CP035739.1	Pseudomonas aeruginosa strain 1334/14	Pseudomonas aeruginosa	Pseudomonas	5	Pseudomonas1
1579944111	NZ_CP031677.1	Pseudomonas aeruginosa strain E80	Pseudomonas aeruginosa	Pseudomonas	5	Pseudomonas1
1592694737	NZ_CP028368.1	Pseudomonas aeruginosa strain PA-VAP-4	Pseudomonas aeruginosa	Pseudomonas	5	Pseudomonas1
1592786039	NZ_CP028330.1	Pseudomonas aeruginosa strain PA-VAP-3	Pseudomonas aeruginosa	Pseudomonas	5	Pseudomonas1
1592790391	NZ_CP028332.1	Pseudomonas aeruginosa strain PA-VAP-1	Pseudomonas aeruginosa	Pseudomonas	5	Pseudomonas1
1592804855	NZ_CP028331.1	Pseudomonas aeruginosa strain PA-VAP-2	Pseudomonas aeruginosa	Pseudomonas	5	Pseudomonas1
1595579360	NZ_CP037925.1	Pseudomonas aeruginosa strain AES1M	Pseudomonas aeruginosa	Pseudomonas	5	Pseudomonas1
1595586734	NZ_CP037926.1	Pseudomonas aeruginosa strain AES1R	Pseudomonas aeruginosa	Pseudomonas	5	Pseudomonas1
1601774118	NZ_LS998783.1	Pseudomonas aeruginosa isolate 1	Pseudomonas aeruginosa	Pseudomonas	5	Pseudomonas1
1614133203	NZ_CP038661.1	Pseudomonas aeruginosa strain AJ D 2	Pseudomonas aeruginosa	Pseudomonas	5	Pseudomonas1
1624194460	NZ_CP039293.1	Pseudomonas aeruginosa strain PABL048	Pseudomonas aeruginosa	Pseudomonas	5	Pseudomonas1
1634465210	NZ_CP039749.1	Pseudomonas aeruginosa strain PRD-10	Pseudomonas aeruginosa	Pseudomonas	5	Pseudomonas1
1639041515	LR590472.1	Pseudomonas aeruginosa strain NCTC13620	Pseudomonas aeruginosa	Pseudomonas	5	Pseudomonas1
1639051927	LR590473.1	Pseudomonas aeruginosa strain NCTC13359	Pseudomonas aeruginosa	Pseudomonas	5	Pseudomonas1
1639062328	LR590474.1	Pseudomonas aeruginosa strain NCTC13618	Pseudomonas aeruginosa	Pseudomonas	5	Pseudomonas1
1654841213	NZ_CP040127.1	Pseudomonas aeruginosa strain PA298	Pseudomonas aeruginosa	Pseudomonas	5	Pseudomonas1
1654843569	NZ_CP031449.2	Pseudomonas aeruginosa strain 97	Pseudomonas aeruginosa	Pseudomonas	5	Pseudomonas1
1693408638	NZ_CP041013.1	Pseudomonas aeruginosa strain FDAARGOS_610	Pseudomonas aeruginosa	Pseudomonas	5	Pseudomonas1
1693417759	NZ_CP041008.1	Pseudomonas aeruginosa strain FDAARGOS_767	Pseudomonas aeruginosa	Pseudomonas	5	Pseudomonas1
1695109124	NZ_CP032569.1	Pseudomonas aeruginosa strain BA7823	Pseudomonas aeruginosa	Pseudomonas	5	Pseudomonas1
1706443274	NZ_CP041354.1	Pseudomonas aeruginosa strain AZPAE15042	Pseudomonas aeruginosa	Pseudomonas	5	Pseudomonas1
1713178754	NZ_CP041772.1	Pseudomonas aeruginosa strain 243931	Pseudomonas aeruginosa	Pseudomonas	5	Pseudomonas1
1713199432	NZ_CP041771.1	Pseudomonas aeruginosa strain A681	Pseudomonas aeruginosa	Pseudomonas	5	Pseudomonas1
1716840486	NZ_CP041785.1	Pseudomonas aeruginosa strain SCAID WND3-2019	Pseudomonas aeruginosa	Pseudomonas	5	Pseudomonas1
1716864727	NZ_CP041787.1	Pseudomonas aeruginosa strain SCAID WND1-2019	Pseudomonas aeruginosa	Pseudomonas	5	Pseudomonas1
1716924416	NZ_CP041786.1	Pseudomonas aeruginosa strain SCAID WND2-2019	Pseudomonas aeruginosa	Pseudomonas	5	Pseudomonas1
1717080514	NZ_CP041773.1	Pseudomonas aeruginosa strain 519119	Pseudomonas aeruginosa	Pseudomonas	5	Pseudomonas1
1717104072	NZ_CP041774.1	Pseudomonas aeruginosa strain 60503	Pseudomonas aeruginosa	Pseudomonas	5	Pseudomonas1
1719584829	NZ_CP040684.1	Pseudomonas aeruginosa strain C79	Pseudomonas aeruginosa	Pseudomonas	5	Pseudomonas1
1727934724	NZ_CP028849.1	Pseudomonas aeruginosa strain IMP68	Pseudomonas aeruginosa	Pseudomonas	5	Pseudomonas1
1727966195	NZ_CP028848.1	Pseudomonas aeruginosa strain IMP67	Pseudomonas aeruginosa	Pseudomonas	5	Pseudomonas1
1728110379	NZ_CP028959.1	Pseudomonas aeruginosa strain IMP66	Pseudomonas aeruginosa	Pseudomonas	5	Pseudomonas1
1740655575	NZ_CP043328.1	Pseudomonas aeruginosa strain CCUG 51971	Pseudomonas aeruginosa	Pseudomonas	5	Pseudomonas1
1741003522	NZ_CP043483.1	Pseudomonas aeruginosa strain GIMC5001:PAT-23	Pseudomonas aeruginosa	Pseudomonas	5	Pseudomonas1
1741192904	NZ_CP042269.1	Pseudomonas aeruginosa strain HOU1	Pseudomonas aeruginosa	Pseudomonas	5	Pseudomonas1
1741358348	NZ_CP043549.1	Pseudomonas aeruginosa strain GIMC5002:PAT-169	Pseudomonas aeruginosa	Pseudomonas	5	Pseudomonas1
1752487388	NZ_CP044006.1	Pseudomonas aeruginosa strain E90	Pseudomonas aeruginosa	Pseudomonas	5	Pseudomonas1
1758250852	NZ_CP034244.1	Pseudomonas aeruginosa UCBPP-PA14	Pseudomonas aeruginosa	Pseudomonas	5	Pseudomonas1
1772334761	CP042967.1	Pseudomonas aeruginosa PA99	Pseudomonas aeruginosa	Pseudomonas	5	Pseudomonas1
1772721267	NZ_CP024630.1	Pseudomonas aeruginosa strain PA59	Pseudomonas aeruginosa	Pseudomonas	5	Pseudomonas1
1774834815	NZ_CP045768.1	Pseudomonas aeruginosa strain CFSAN084950	Pseudomonas aeruginosa	Pseudomonas	5	Pseudomonas1
1775996199	NZ_CP045739.1	Pseudomonas aeruginosa strain AG1	Pseudomonas aeruginosa	Pseudomonas	5	Pseudomonas1
1776196883	NZ_CP041945.1	Pseudomonas aeruginosa strain ST773	Pseudomonas aeruginosa	Pseudomonas	5	Pseudomonas1
1777705692	NZ_CP046061.1	Pseudomonas aeruginosa strain 1811-13R031	Pseudomonas aeruginosa	Pseudomonas	5	Pseudomonas1
1777706543	NZ_CP046060.1	Pseudomonas aeruginosa strain 1811-18R001	Pseudomonas aeruginosa	Pseudomonas	5	Pseudomonas1
1777714347	NZ_CP046069.1	Pseudomonas aeruginosa strain KRP1	Pseudomonas aeruginosa	Pseudomonas	5	Pseudomonas1
1779542287	NZ_CP039990.1	Pseudomonas aeruginosa strain T2101	Pseudomonas aeruginosa	Pseudomonas	5	Pseudomonas1
1779555932	NZ_CP039988.1	Pseudomonas aeruginosa strain T2436	Pseudomonas aeruginosa	Pseudomonas	5	Pseudomonas1
1788204947	NZ_LR657304.1	Pseudomonas aeruginosa PAK	Pseudomonas aeruginosa	Pseudomonas	5	Pseudomonas1
1797755280	NZ_CP047061.1	Pseudomonas aeruginosa strain delta6_2	Pseudomonas aeruginosa	Pseudomonas	5	Pseudomonas1
1797755373	NZ_CP047065.1	Pseudomonas aeruginosa strain delta6_6	Pseudomonas aeruginosa	Pseudomonas	5	Pseudomonas1
1797755458	NZ_CP047066.1	Pseudomonas aeruginosa strain delta10	Pseudomonas aeruginosa	Pseudomonas	5	Pseudomonas1
1797756243	NZ_CP047070.1	Pseudomonas aeruginosa strain Environ_2	Pseudomonas aeruginosa	Pseudomonas	5	Pseudomonas1
1797776759	NZ_CP047062.1	Pseudomonas aeruginosa strain delta6_3	Pseudomonas aeruginosa	Pseudomonas	5	Pseudomonas1
1797779170	NZ_CP047067.1	Pseudomonas aeruginosa strain Cas9_1	Pseudomonas aeruginosa	Pseudomonas	5	Pseudomonas1
1797799807	NZ_CP047064.1	Pseudomonas aeruginosa strain delta6_5	Pseudomonas aeruginosa	Pseudomonas	5	Pseudomonas1
1797801651	NZ_CP047069.1	Pseudomonas aeruginosa strain Environ_1	Pseudomonas aeruginosa	Pseudomonas	5	Pseudomonas1
1797823642	NZ_CP047063.1	Pseudomonas aeruginosa strain delta6_4	Pseudomonas aeruginosa	Pseudomonas	5	Pseudomonas1
1797824109	NZ_CP047068.1	Pseudomonas aeruginosa strain Cas9_2	Pseudomonas aeruginosa	Pseudomonas	5	Pseudomonas1
1798042478	NZ_CP028132.1	Pseudomonas aeruginosa strain YB01	Pseudomonas aeruginosa	Pseudomonas	5	Pseudomonas1
1800083257	NZ_CP047592.1	Pseudomonas aeruginosa strain INP-43	Pseudomonas aeruginosa	Pseudomonas	5	Pseudomonas1
1800216108	NZ_CP047697.1	Pseudomonas aeruginosa strain RD1-3	Pseudomonas aeruginosa	Pseudomonas	5	Pseudomonas1
1806672108	NZ_LR739071.1	Pseudomonas aeruginosa strain C7-25 isolate C7-25	Pseudomonas aeruginosa	Pseudomonas	5	Pseudomonas1
1806674462	NZ_LR739068.1	Pseudomonas aeruginosa strain PcyII-29 isolate PcyII-29	Pseudomonas aeruginosa	Pseudomonas	5	Pseudomonas1
1806675028	NZ_LR739069.1	Pseudomonas aeruginosa strain PcyII-40 isolate PcyII-40	Pseudomonas aeruginosa	Pseudomonas	5	Pseudomonas1
1810679942	CP048791.1	Pseudomonas aeruginosa strain VIT PC9	Pseudomonas aeruginosa	Pseudomonas	5	Pseudomonas1
1812362096	NZ_CP025055.2	Pseudomonas aeruginosa strain PB350	Pseudomonas aeruginosa	Pseudomonas	5	Pseudomonas1
1821084984	NZ_CP045002.1	Pseudomonas aeruginosa strain PAG5	Pseudomonas aeruginosa	Pseudomonas	5	Pseudomonas1
1822657166	NZ_CP045916.1	Pseudomonas aeruginosa strain CF39S	Pseudomonas aeruginosa	Pseudomonas	5	Pseudomonas1
1831052453	NZ_CP046602.1	Pseudomonas aeruginosa strain CMC-115	Pseudomonas aeruginosa	Pseudomonas	5	Pseudomonas1
1836669091	NZ_CP051547.1	Pseudomonas aeruginosa strain AA2	Pseudomonas aeruginosa	Pseudomonas	5	Pseudomonas1
1838381627	NZ_CP052759.1	Pseudomonas aeruginosa strain LYT4	Pseudomonas aeruginosa	Pseudomonas	5	Pseudomonas1
1839858320	NZ_CP053028.1	Pseudomonas aeruginosa PAO1	Pseudomonas aeruginosa	Pseudomonas	5	Pseudomonas1
1846588406	NZ_CP049161.1	Pseudomonas aeruginosa strain MS14403	Pseudomonas aeruginosa	Pseudomonas	5	Pseudomonas1
1847268950	NZ_CP053705.1	Pseudomonas aeruginosa strain PAC6	Pseudomonas aeruginosa	Pseudomonas	5	Pseudomonas1
1847269314	NZ_CP053706.1	Pseudomonas aeruginosa strain PAC1	Pseudomonas aeruginosa	Pseudomonas	5	Pseudomonas1
1847269580	NZ_CP053686.1	Pseudomonas aeruginosa strain SCAID PHRX1-2019	Pseudomonas aeruginosa	Pseudomonas	5	Pseudomonas1
1848833038	NZ_CP053922.1	Pseudomonas aeruginosa strain YD001	Pseudomonas aeruginosa	Pseudomonas	5	Pseudomonas1
1848833482	NZ_CP053917.1	Pseudomonas aeruginosa strain PSE6684	Pseudomonas aeruginosa	Pseudomonas	5	Pseudomonas1
1850112819	NZ_CP044533.1	Pseudomonas aeruginosa strain Ps33	Pseudomonas aeruginosa	Pseudomonas	5	Pseudomonas1
1850112872	NZ_CP053687.1	Pseudomonas aeruginosa strain K19PSE24	Pseudomonas aeruginosa	Pseudomonas	5	Pseudomonas1
1852204552	NZ_CP050054.1	Pseudomonas aeruginosa strain LIUYANG-A	Pseudomonas aeruginosa	Pseudomonas	5	Pseudomonas1
1852211460	NZ_CP050052.1	Pseudomonas aeruginosa strain LIUYANG-E	Pseudomonas aeruginosa	Pseudomonas	5	Pseudomonas1
1852214604	NZ_CP050053.1	Pseudomonas aeruginosa strain LIUYANG-C	Pseudomonas aeruginosa	Pseudomonas	5	Pseudomonas1
1853623946	NZ_CP054472.1	Pseudomonas aeruginosa strain PAAK088	Pseudomonas aeruginosa	Pseudomonas	5	Pseudomonas1
1853780462	NZ_CP054473.1	Pseudomonas aeruginosa strain PAAK095	Pseudomonas aeruginosa	Pseudomonas	5	Pseudomonas1
1857882228	NZ_CP050324.1	Pseudomonas aeruginosa strain DVT427	Pseudomonas aeruginosa	Pseudomonas	5	Pseudomonas1
1857885190	NZ_CP050328.1	Pseudomonas aeruginosa strain DVT419	Pseudomonas aeruginosa	Pseudomonas	5	Pseudomonas1
1857900247	NZ_CP050327.1	Pseudomonas aeruginosa strain DVT421	Pseudomonas aeruginosa	Pseudomonas	5	Pseudomonas1
1857906614	NZ_CP050322.1	Pseudomonas aeruginosa strain DVT729	Pseudomonas aeruginosa	Pseudomonas	5	Pseudomonas1
1857918384	NZ_CP050325.1	Pseudomonas aeruginosa strain DVT425	Pseudomonas aeruginosa	Pseudomonas	5	Pseudomonas1
1857930167	NZ_CP050323.1	Pseudomonas aeruginosa strain DVT429	Pseudomonas aeruginosa	Pseudomonas	5	Pseudomonas1
1858112999	NZ_CP050326.1	Pseudomonas aeruginosa strain DVT423	Pseudomonas aeruginosa	Pseudomonas	5	Pseudomonas1
1858933457	NZ_CP050335.1	Pseudomonas aeruginosa strain DVT401	Pseudomonas aeruginosa	Pseudomonas	5	Pseudomonas1
1858933856	NZ_CP050331.1	Pseudomonas aeruginosa strain DVT414	Pseudomonas aeruginosa	Pseudomonas	5	Pseudomonas1
1858934413	NZ_CP050330.1	Pseudomonas aeruginosa strain DVT779	Pseudomonas aeruginosa	Pseudomonas	5	Pseudomonas1
1858934536	NZ_CP050333.1	Pseudomonas aeruginosa strain DVT412	Pseudomonas aeruginosa	Pseudomonas	5	Pseudomonas1
1858934859	NZ_CP050329.1	Pseudomonas aeruginosa strain DVT417	Pseudomonas aeruginosa	Pseudomonas	5	Pseudomonas1
1858935000	NZ_CP050334.1	Pseudomonas aeruginosa strain DVT410	Pseudomonas aeruginosa	Pseudomonas	5	Pseudomonas1
1858935201	NZ_CP050332.1	Pseudomonas aeruginosa strain DVT413	Pseudomonas aeruginosa	Pseudomonas	5	Pseudomonas1
1858936181	NZ_CP054591.1	Pseudomonas aeruginosa strain CDN118	Pseudomonas aeruginosa	Pseudomonas	5	Pseudomonas1
1859867169	NZ_CP021380.2	Pseudomonas aeruginosa strain CCBH4851	Pseudomonas aeruginosa	Pseudomonas	5	Pseudomonas1
1863489757	NZ_CP056093.1	Pseudomonas aeruginosa strain PABCH13	Pseudomonas aeruginosa	Pseudomonas	5	Pseudomonas1
1863490180	NZ_CP056098.1	Pseudomonas aeruginosa strain PABCH05	Pseudomonas aeruginosa	Pseudomonas	5	Pseudomonas1
1863490341	NZ_CP056100.1	Pseudomonas aeruginosa strain PABCH01	Pseudomonas aeruginosa	Pseudomonas	5	Pseudomonas1
1863490527	NZ_CP056089.1	Pseudomonas aeruginosa strain PABCH46	Pseudomonas aeruginosa	Pseudomonas	5	Pseudomonas1
1863490840	NZ_CP056094.1	Pseudomonas aeruginosa strain PABCH10	Pseudomonas aeruginosa	Pseudomonas	5	Pseudomonas1
1863490913	NZ_CP056095.1	Pseudomonas aeruginosa strain PABCH09	Pseudomonas aeruginosa	Pseudomonas	5	Pseudomonas1
1863491177	NZ_CP056090.1	Pseudomonas aeruginosa strain PABCH42	Pseudomonas aeruginosa	Pseudomonas	5	Pseudomonas1
1863491409	NZ_CP056101.1	Pseudomonas aeruginosa strain PABCH45	Pseudomonas aeruginosa	Pseudomonas	5	Pseudomonas1
1863491484	NZ_CP056092.1	Pseudomonas aeruginosa strain PABCH14	Pseudomonas aeruginosa	Pseudomonas	5	Pseudomonas1
1864106468	NZ_CP056774.1	Pseudomonas aeruginosa strain CDN129	Pseudomonas aeruginosa	Pseudomonas	5	Pseudomonas1
1864732680	NZ_CP034908.1	Pseudomonas aeruginosa strain PA0750	Pseudomonas aeruginosa	Pseudomonas	5	Pseudomonas1
1867998590	NZ_CP046404.1	Pseudomonas aeruginosa strain SE5416	Pseudomonas aeruginosa	Pseudomonas	5	Pseudomonas1
1867998700	NZ_CP046405.1	Pseudomonas aeruginosa strain SE5443	Pseudomonas aeruginosa	Pseudomonas	5	Pseudomonas1
1867998714	NZ_CP058323.1	Pseudomonas aeruginosa strain LV	Pseudomonas aeruginosa	Pseudomonas	5	Pseudomonas1
1868006548	NZ_CP046403.1	Pseudomonas aeruginosa strain SE5369	Pseudomonas aeruginosa	Pseudomonas	5	Pseudomonas1
1868639132	NZ_CP058332.1	Pseudomonas aeruginosa strain B18	Pseudomonas aeruginosa	Pseudomonas	5	Pseudomonas1
1876870468	NZ_CP053113.1	Pseudomonas aeruginosa strain PAO1CT	Pseudomonas aeruginosa	Pseudomonas	5	Pseudomonas1
1876873393	NZ_CP053119.1	Pseudomonas aeruginosa strain A17CT	Pseudomonas aeruginosa	Pseudomonas	5	Pseudomonas1
1876875265	NZ_CP053117.1	Pseudomonas aeruginosa strain P16CT	Pseudomonas aeruginosa	Pseudomonas	5	Pseudomonas1
1876876400	NZ_CP053115.1	Pseudomonas aeruginosa strain P4CT	Pseudomonas aeruginosa	Pseudomonas	5	Pseudomonas1
1876876972	NZ_CP053118.1	Pseudomonas aeruginosa strain A17PBS	Pseudomonas aeruginosa	Pseudomonas	5	Pseudomonas1
1876914172	NZ_CP053114.1	Pseudomonas aeruginosa strain P4PBS	Pseudomonas aeruginosa	Pseudomonas	5	Pseudomonas1
1876941839	NZ_CP053116.1	Pseudomonas aeruginosa strain P16PBS	Pseudomonas aeruginosa	Pseudomonas	5	Pseudomonas1
1876941841	NZ_CP053112.1	Pseudomonas aeruginosa strain PAO1PBS	Pseudomonas aeruginosa	Pseudomonas	5	Pseudomonas1
1876942523	NZ_CP053110.1	Pseudomonas aeruginosa strain UAB2PBS	Pseudomonas aeruginosa	Pseudomonas	5	Pseudomonas1
1876942527	NZ_CP053111.1	Pseudomonas aeruginosa strain UAB2CT	Pseudomonas aeruginosa	Pseudomonas	5	Pseudomonas1
1879219394	NZ_CP058331.1	Pseudomonas aeruginosa strain ACR22	Pseudomonas aeruginosa	Pseudomonas	5	Pseudomonas1
1879223371	NZ_CP058333.1	Pseudomonas aeruginosa strain ACR20	Pseudomonas aeruginosa	Pseudomonas	5	Pseudomonas1
1885889678	NZ_CP051770.1	Pseudomonas aeruginosa strain GIMC5021:PA52Ts17	Pseudomonas aeruginosa	Pseudomonas	5	Pseudomonas1
1885890305	NZ_CP051766.1	Pseudomonas aeruginosa strain GIMC5019:PA52Ts1	Pseudomonas aeruginosa	Pseudomonas	5	Pseudomonas1
1885901072	NZ_CP051768.1	Pseudomonas aeruginosa strain GIMC5020:PA52Ts2	Pseudomonas aeruginosa	Pseudomonas	5	Pseudomonas1
1888228751	NZ_CP059063.1	Pseudomonas aeruginosa strain GIMC5034:PA52Ts32	Pseudomonas aeruginosa	Pseudomonas	5	Pseudomonas1
1889821086	NZ_CP059995.1	Pseudomonas aeruginosa strain 401853	Pseudomonas aeruginosa	Pseudomonas	5	Pseudomonas1
1893351850	NZ_CP060086.1	Pseudomonas aeruginosa strain JNQH-PA57	Pseudomonas aeruginosa	Pseudomonas	5	Pseudomonas1
1899533789	NZ_CP060703.1	Pseudomonas aeruginosa strain NRD619	Pseudomonas aeruginosa	Pseudomonas	5	Pseudomonas1
1899944575	NZ_CP061034.1	Pseudomonas aeruginosa strain PA3	Pseudomonas aeruginosa	Pseudomonas	5	Pseudomonas1
1906898200	CP059852.1	Pseudomonas aeruginosa strain ZM03	Pseudomonas aeruginosa	Pseudomonas	5	Pseudomonas1
1912169460	NZ_CP061850.1	Pseudomonas aeruginosa strain R31	Pseudomonas aeruginosa	Pseudomonas	5	Pseudomonas1
1914557904	NZ_CP062219.1	Pseudomonas aeruginosa strain JT86	Pseudomonas aeruginosa	Pseudomonas	5	Pseudomonas1
1925196583	NZ_CP063237.1	Pseudomonas aeruginosa strain mPA08-31	Pseudomonas aeruginosa	Pseudomonas	5	Pseudomonas1
1938802249	NZ_CP060240.1	Pseudomonas aeruginosa strain G-I-1	Pseudomonas aeruginosa	Pseudomonas	5	Pseudomonas1
1938852869	NZ_CP060242.1	Pseudomonas aeruginosa strain B-I-1	Pseudomonas aeruginosa	Pseudomonas	5	Pseudomonas1
1938945197	NZ_CP060243.1	Pseudomonas aeruginosa strain A-I-1	Pseudomonas aeruginosa	Pseudomonas	5	Pseudomonas1
1939179645	NZ_CP060241.1	Pseudomonas aeruginosa strain C-I-1	Pseudomonas aeruginosa	Pseudomonas	5	Pseudomonas1
1941076928	NZ_CP065412.1	Pseudomonas aeruginosa isolate P33	Pseudomonas aeruginosa	Pseudomonas	5	Pseudomonas1
1941077235	NZ_CP065417.1	Pseudomonas aeruginosa isolate P23	Pseudomonas aeruginosa	Pseudomonas	5	Pseudomonas1
1942805033	NZ_CP063047.1	Pseudomonas aeruginosa strain KC-Tt-1	Pseudomonas aeruginosa	Pseudomonas	5	Pseudomonas1
1946182279	NZ_CP065848.1	Pseudomonas aeruginosa strain CMC-097	Pseudomonas aeruginosa	Pseudomonas	5	Pseudomonas1
1948243479	NZ_CP065866.1	Pseudomonas aeruginosa strain TJ2019-017	Pseudomonas aeruginosa	Pseudomonas	5	Pseudomonas1
1948247443	NZ_CP065865.1	Pseudomonas aeruginosa strain TJ2019-022	Pseudomonas aeruginosa	Pseudomonas	5	Pseudomonas1
1948249661	NZ_CP027857.1	Pseudomonas aeruginosa strain MPAO1	Pseudomonas aeruginosa	Pseudomonas	5	Pseudomonas1
1948257203	NZ_CP065867.1	Pseudomonas aeruginosa strain TJ2014-049	Pseudomonas aeruginosa	Pseudomonas	5	Pseudomonas1
1949160833	NZ_CP065966.1	Pseudomonas aeruginosa strain FDAARGOS_1041	Pseudomonas aeruginosa	Pseudomonas	5	Pseudomonas1
1949624295	NZ_CP054623.1	Pseudomonas aeruginosa strain DL201330	Pseudomonas aeruginosa	Pseudomonas	5	Pseudomonas1
1956233473	NZ_CP061699.1	Pseudomonas aeruginosa strain LYSZa7	Pseudomonas aeruginosa	Pseudomonas	5	Pseudomonas1
1957620553	NZ_CP046402.2	Pseudomonas aeruginosa strain SE5331	Pseudomonas aeruginosa	Pseudomonas	5	Pseudomonas1
1957629970	NZ_CP045552.2	Pseudomonas aeruginosa strain YT12746	Pseudomonas aeruginosa	Pseudomonas	5	Pseudomonas1
1957631712	NZ_CP046406.2	Pseudomonas aeruginosa strain SE5458	Pseudomonas aeruginosa	Pseudomonas	5	Pseudomonas1
1958995199	NZ_LR890619.1	Pseudomonas aeruginosa isolate MINF_7A-sc-2280434	Pseudomonas aeruginosa	Pseudomonas	5	Pseudomonas1
1959245582	NZ_LR898867.1	Pseudomonas aeruginosa isolate MINF_3A-sc-2280432	Pseudomonas aeruginosa	Pseudomonas	5	Pseudomonas1
1960166407	NZ_CP068239.1	Pseudomonas aeruginosa strain PA19-3047	Pseudomonas aeruginosa	Pseudomonas	5	Pseudomonas1
1960338206	NZ_CP068238.1	Pseudomonas aeruginosa strain A39-1	Pseudomonas aeruginosa	Pseudomonas	5	Pseudomonas1
1961021015	NZ_CP025056.2	Pseudomonas aeruginosa strain PB367	Pseudomonas aeruginosa	Pseudomonas	5	Pseudomonas1
1962970233	NZ_CP054844.1	Pseudomonas aeruginosa strain SE5357	Pseudomonas aeruginosa	Pseudomonas	5	Pseudomonas1
1963044963	NZ_CP054581.1	Pseudomonas aeruginosa strain YTSEY8	Pseudomonas aeruginosa	Pseudomonas	5	Pseudomonas1
1963047203	NZ_CP054845.1	Pseudomonas aeruginosa strain SE5429	Pseudomonas aeruginosa	Pseudomonas	5	Pseudomonas1
1963096975	NZ_CP054843.1	Pseudomonas aeruginosa strain SE5352	Pseudomonas aeruginosa	Pseudomonas	5	Pseudomonas1
1963097657	NZ_CP060392.1	Pseudomonas aeruginosa strain 1903031130	Pseudomonas aeruginosa	Pseudomonas	5	Pseudomonas1
1982667652	NZ_CP069198.1	Pseudomonas aeruginosa strain 152962	Pseudomonas aeruginosa	Pseudomonas	5	Pseudomonas1
1983697208	NZ_CP024024.1	Pseudomonas aeruginosa strain PARM801	Pseudomonas aeruginosa	Pseudomonas	5	Pseudomonas1
1995259084	NZ_CP070471.1	Pseudomonas aeruginosa strain B17932	Pseudomonas aeruginosa	Pseudomonas	5	Pseudomonas1
1995268341	NZ_CP070467.1	Pseudomonas aeruginosa strain B17416	Pseudomonas aeruginosa	Pseudomonas	5	Pseudomonas1
2015338822	NZ_CP071730.1	Pseudomonas aeruginosa strain LYSZa5	Pseudomonas aeruginosa	Pseudomonas	5	Pseudomonas1
2015403595	NZ_CP071731.1	Pseudomonas aeruginosa strain LYSZa2	Pseudomonas aeruginosa	Pseudomonas	5	Pseudomonas1
2020354398	NZ_CP031876.1	Pseudomonas aeruginosa strain WPB101	Pseudomonas aeruginosa	Pseudomonas	5	Pseudomonas1
2020356803	NZ_CP032541.1	Pseudomonas aeruginosa strain PGN5	Pseudomonas aeruginosa	Pseudomonas	5	Pseudomonas1
2020377996	NZ_CP031877.1	Pseudomonas aeruginosa strain WPB100	Pseudomonas aeruginosa	Pseudomonas	5	Pseudomonas1
2020378596	NZ_CP031879.1	Pseudomonas aeruginosa strain WPB098	Pseudomonas aeruginosa	Pseudomonas	5	Pseudomonas1
2020392822	NZ_CP032540.1	Pseudomonas aeruginosa strain PGN4	Pseudomonas aeruginosa	Pseudomonas	5	Pseudomonas1
2020402874	NZ_CP031878.1	Pseudomonas aeruginosa strain WPB099	Pseudomonas aeruginosa	Pseudomonas	5	Pseudomonas1
2020421987	NZ_CP058257.1	Pseudomonas aeruginosa strain PA179	Pseudomonas aeruginosa	Pseudomonas	5	Pseudomonas1
2025124279	NZ_CP072783.1	Pseudomonas aeruginosa strain LICME WGH-6	Pseudomonas aeruginosa	Pseudomonas	5	Pseudomonas1
2030379975	NZ_CP070355.1	Pseudomonas aeruginosa strain PDNC003	Pseudomonas aeruginosa	Pseudomonas	5	Pseudomonas1
2035830794	NZ_CP073080.1	Pseudomonas aeruginosa strain NDTH9845	Pseudomonas aeruginosa	Pseudomonas	5	Pseudomonas1
2035842711	NZ_CP073082.1	Pseudomonas aeruginosa strain WTJH17	Pseudomonas aeruginosa	Pseudomonas	5	Pseudomonas1
2035854714	NZ_CP065947.1	Pseudomonas aeruginosa strain PAS6	Pseudomonas aeruginosa	Pseudomonas	5	Pseudomonas1
2037192807	NZ_CP065948.1	Pseudomonas aeruginosa strain PAM68	Pseudomonas aeruginosa	Pseudomonas	5	Pseudomonas1
2037193621	NZ_CP065374.1	Pseudomonas aeruginosa strain PAG7	Pseudomonas aeruginosa	Pseudomonas	5	Pseudomonas1
2037201396	NZ_CP061780.1	Pseudomonas aeruginosa strain ZBX-P11	Pseudomonas aeruginosa	Pseudomonas	5	Pseudomonas1
2037201854	NZ_CP061777.1	Pseudomonas aeruginosa strain ZBX-P23	Pseudomonas aeruginosa	Pseudomonas	5	Pseudomonas1
2037201859	NZ_CP061779.1	Pseudomonas aeruginosa strain ZBX-P12	Pseudomonas aeruginosa	Pseudomonas	5	Pseudomonas1
2037201863	NZ_CP061778.1	Pseudomonas aeruginosa strain ZBX-P13	Pseudomonas aeruginosa	Pseudomonas	5	Pseudomonas1
2040212123	CP074424.1	Pseudomonas aeruginosa strain 88A	Pseudomonas aeruginosa	Pseudomonas	5	Pseudomonas1
2044993191	NZ_AP024513.1	Pseudomonas aeruginosa isolate Pa12	Pseudomonas aeruginosa	Pseudomonas	5	Pseudomonas1
2045605432	NZ_CP075176.1	Pseudomonas aeruginosa strain PA790	Pseudomonas aeruginosa	Pseudomonas	5	Pseudomonas1
2057432188	NZ_CP053390.1	Pseudomonas aeruginosa strain TL1285	Pseudomonas aeruginosa	Pseudomonas	5	Pseudomonas1
2074338630	NZ_CP061376.1	Pseudomonas aeruginosa strain HS17-127	Pseudomonas aeruginosa	Pseudomonas	5	Pseudomonas1
2074365995	NZ_CP080011.1	Pseudomonas aeruginosa strain TL3773	Pseudomonas aeruginosa	Pseudomonas	5	Pseudomonas1
2074430535	NZ_CP080007.1	Pseudomonas aeruginosa strain S-1	Pseudomonas aeruginosa	Pseudomonas	5	Pseudomonas1
2075360819	CP080282.1	Pseudomonas aeruginosa strain UNC_PaerCF16	Pseudomonas aeruginosa	Pseudomonas	5	Pseudomonas1
2075371520	CP080287.1	Pseudomonas aeruginosa strain UNC_PaerCF11	Pseudomonas aeruginosa	Pseudomonas	5	Pseudomonas1
2075474892	NZ_CP080281.1	Pseudomonas aeruginosa strain UNC_PaerCF17	Pseudomonas aeruginosa	Pseudomonas	5	Pseudomonas1
2075476417	NZ_CP080280.1	Pseudomonas aeruginosa strain UNC_PaerCF20	Pseudomonas aeruginosa	Pseudomonas	5	Pseudomonas1
2075485494	NZ_CP080288.1	Pseudomonas aeruginosa strain UNC_PaerCF05	Pseudomonas aeruginosa	Pseudomonas	5	Pseudomonas1
2075488351	NZ_CP080289.1	Pseudomonas aeruginosa strain PA2207	Pseudomonas aeruginosa	Pseudomonas	5	Pseudomonas1
2075489083	NZ_CP080286.1	Pseudomonas aeruginosa strain UNC_PaerCF12	Pseudomonas aeruginosa	Pseudomonas	5	Pseudomonas1
2075531554	NZ_CP080285.1	Pseudomonas aeruginosa strain UNC_PaerCF14	Pseudomonas aeruginosa	Pseudomonas	5	Pseudomonas1
2075947520	NZ_CP071947.1	Pseudomonas aeruginosa strain 2020HL-00861	Pseudomonas aeruginosa	Pseudomonas	5	Pseudomonas1
2078680508	NZ_CP080511.1	Pseudomonas aeruginosa strain DJ06	Pseudomonas aeruginosa	Pseudomonas	5	Pseudomonas1
2078696085	NZ_CP080518.1	Pseudomonas aeruginosa strain YY322	Pseudomonas aeruginosa	Pseudomonas	5	Pseudomonas1
2084252802	NZ_CP081287.1	Pseudomonas aeruginosa strain F092021	Pseudomonas aeruginosa	Pseudomonas	5	Pseudomonas1
2084297315	NZ_CP081202.1	Pseudomonas aeruginosa strain P9W	Pseudomonas aeruginosa	Pseudomonas	5	Pseudomonas1
2084948903	NZ_CP081345.1	Pseudomonas aeruginosa strain F291007	Pseudomonas aeruginosa	Pseudomonas	5	Pseudomonas1
2084955548	NZ_CP081346.1	Pseudomonas aeruginosa strain SE5419	Pseudomonas aeruginosa	Pseudomonas	5	Pseudomonas1
2085956700	NZ_CP081477.1	Pseudomonas aeruginosa strain P8W	Pseudomonas aeruginosa	Pseudomonas	5	Pseudomonas1
2089956748	NZ_CP078004.1	Pseudomonas aeruginosa strain QZPH16	Pseudomonas aeruginosa	Pseudomonas	5	Pseudomonas1
2089961096	NZ_CP064403.1	Pseudomonas aeruginosa strain WTJH12	Pseudomonas aeruginosa	Pseudomonas	5	Pseudomonas1
2089961100	NZ_CP078002.1	Pseudomonas aeruginosa strain QZPH21	Pseudomonas aeruginosa	Pseudomonas	5	Pseudomonas1
2089961264	NZ_CP077988.1	Pseudomonas aeruginosa strain ZPPH1	Pseudomonas aeruginosa	Pseudomonas	5	Pseudomonas1
2089961357	NZ_CP077985.1	Pseudomonas aeruginosa strain ZPPH2	Pseudomonas aeruginosa	Pseudomonas	5	Pseudomonas1
2089961364	NZ_CP064393.1	Pseudomonas aeruginosa strain SRRSH1101	Pseudomonas aeruginosa	Pseudomonas	5	Pseudomonas1
2089961419	NZ_CP064395.1	Pseudomonas aeruginosa strain SRRSH1408	Pseudomonas aeruginosa	Pseudomonas	5	Pseudomonas1
2089961434	NZ_CP078006.1	Pseudomonas aeruginosa strain NDTH7329	Pseudomonas aeruginosa	Pseudomonas	5	Pseudomonas1
2089962250	NZ_CP077971.1	Pseudomonas aeruginosa strain ZPPH33	Pseudomonas aeruginosa	Pseudomonas	5	Pseudomonas1
2089965935	NZ_CP077994.1	Pseudomonas aeruginosa strain SRRSH2790	Pseudomonas aeruginosa	Pseudomonas	5	Pseudomonas1
2089969212	NZ_CP064397.1	Pseudomonas aeruginosa strain SRRSH1002	Pseudomonas aeruginosa	Pseudomonas	5	Pseudomonas1
2089969296	NZ_CP077977.1	Pseudomonas aeruginosa strain ZPPH29	Pseudomonas aeruginosa	Pseudomonas	5	Pseudomonas1
2089969480	NZ_CP078007.1	Pseudomonas aeruginosa strain FAHZU40	Pseudomonas aeruginosa	Pseudomonas	5	Pseudomonas1
2089969709	NZ_CP077997.1	Pseudomonas aeruginosa strain SRRSH1521	Pseudomonas aeruginosa	Pseudomonas	5	Pseudomonas1
2089971893	NZ_CP064399.1	Pseudomonas aeruginosa strain QZPH41	Pseudomonas aeruginosa	Pseudomonas	5	Pseudomonas1
2089972469	NZ_CP064392.1	Pseudomonas aeruginosa strain SRRSH15	Pseudomonas aeruginosa	Pseudomonas	5	Pseudomonas1
2089972520	NZ_CP078009.1	Pseudomonas aeruginosa strain FAHZU31	Pseudomonas aeruginosa	Pseudomonas	5	Pseudomonas1
2089975365	NZ_CP064401.1	Pseudomonas aeruginosa strain NDTH10366	Pseudomonas aeruginosa	Pseudomonas	5	Pseudomonas1
2089976592	NZ_CP077999.1	Pseudomonas aeruginosa strain SRRSH1120	Pseudomonas aeruginosa	Pseudomonas	5	Pseudomonas1
2089976782	NZ_CP077981.1	Pseudomonas aeruginosa strain ZPPH14	Pseudomonas aeruginosa	Pseudomonas	5	Pseudomonas1
2091927958	NZ_CP082821.1	Pseudomonas aeruginosa strain SCAID PLC1-2021 (16/222)	Pseudomonas aeruginosa	Pseudomonas	5	Pseudomonas1
2091928976	NZ_CP082822.1	Pseudomonas aeruginosa strain SCAID WND1-2021 (9/195)	Pseudomonas aeruginosa	Pseudomonas	5	Pseudomonas1
2091960627	NZ_CP082823.1	Pseudomonas aeruginosa strain SCAID TST-2021 (7/157)	Pseudomonas aeruginosa	Pseudomonas	5	Pseudomonas1
2103957468	NZ_CP083366.1	Pseudomonas aeruginosa strain PS1793	Pseudomonas aeruginosa	Pseudomonas	5	Pseudomonas1
2129822241	NZ_CP086010.1	Pseudomonas aeruginosa isolate KB-PA_F19	Pseudomonas aeruginosa	Pseudomonas	5	Pseudomonas1
2129915564	NZ_CP086016.1	Pseudomonas aeruginosa isolate KB-PA_3	Pseudomonas aeruginosa	Pseudomonas	5	Pseudomonas1
2151453640	NZ_CP086064.1	Pseudomonas aeruginosa strain CCBH28525	Pseudomonas aeruginosa	Pseudomonas	5	Pseudomonas1
2156053603	NZ_CP080369.1	Pseudomonas aeruginosa SG17M	Pseudomonas aeruginosa	Pseudomonas	5	Pseudomonas1
2156688686	NZ_CP087674.1	Pseudomonas aeruginosa strain P4970C	Pseudomonas aeruginosa	Pseudomonas	5	Pseudomonas1
2156700309	NZ_CP087675.1	Pseudomonas aeruginosa strain P93127	Pseudomonas aeruginosa	Pseudomonas	5	Pseudomonas1
2156700417	NZ_CP087673.1	Pseudomonas aeruginosa strain P96131	Pseudomonas aeruginosa	Pseudomonas	5	Pseudomonas1
2164294401	CP089063.1	Pseudomonas aeruginosa strain UNC_PaerCF37	Pseudomonas aeruginosa	Pseudomonas	5	Pseudomonas1
2164647686	NZ_CP089061.1	Pseudomonas aeruginosa strain UNC_PaerCF41	Pseudomonas aeruginosa	Pseudomonas	5	Pseudomonas1
2164649026	NZ_CP089067.1	Pseudomonas aeruginosa strain UNC_PaerCF19	Pseudomonas aeruginosa	Pseudomonas	5	Pseudomonas1
2164666316	NZ_CP089062.1	Pseudomonas aeruginosa strain UNC_PaerCF38	Pseudomonas aeruginosa	Pseudomonas	5	Pseudomonas1
2164667707	NZ_CP089068.1	Pseudomonas aeruginosa strain UNC_PaerCF13	Pseudomonas aeruginosa	Pseudomonas	5	Pseudomonas1
2164693091	NZ_CP089064.1	Pseudomonas aeruginosa strain UNC_PaerCF35	Pseudomonas aeruginosa	Pseudomonas	5	Pseudomonas1
2164693366	NZ_CP089065.1	Pseudomonas aeruginosa strain UNC_PaerCF34	Pseudomonas aeruginosa	Pseudomonas	5	Pseudomonas1
2169591720	NZ_CP089745.1	Pseudomonas aeruginosa strain Pa608	Pseudomonas aeruginosa	Pseudomonas	5	Pseudomonas1
2169864359	NZ_CP089849.1	Pseudomonas aeruginosa strain PA0523	Pseudomonas aeruginosa	Pseudomonas	5	Pseudomonas1
2174421618	NZ_CP053747.1	Pseudomonas aeruginosa strain Pae1255-NDM1	Pseudomonas aeruginosa	Pseudomonas	5	Pseudomonas1
2176864754	NZ_CP090348.1	Pseudomonas aeruginosa strain PA8329	Pseudomonas aeruginosa	Pseudomonas	5	Pseudomonas1
2178739183	NZ_CP089236.1	Pseudomonas aeruginosa strain JNQH-PA027	Pseudomonas aeruginosa	Pseudomonas	5	Pseudomonas1
2178827360	NZ_CP089238.1	Pseudomonas aeruginosa strain JNQH-PA033	Pseudomonas aeruginosa	Pseudomonas	5	Pseudomonas1
2178832824	NZ_CP086122.1	Pseudomonas aeruginosa strain MIN-155	Pseudomonas aeruginosa	Pseudomonas	5	Pseudomonas1
2181151995	NZ_CP069325.1	Pseudomonas aeruginosa strain R02	Pseudomonas aeruginosa	Pseudomonas	5	Pseudomonas1
2181161757	NZ_CP054794.1	Pseudomonas aeruginosa strain A0002	Pseudomonas aeruginosa	Pseudomonas	5	Pseudomonas1
2181174810	NZ_CP054789.1	Pseudomonas aeruginosa strain SE5381	Pseudomonas aeruginosa	Pseudomonas	5	Pseudomonas1
2181178370	NZ_CP054786.1	Pseudomonas aeruginosa strain DL201330	Pseudomonas aeruginosa	Pseudomonas	5	Pseudomonas1
2181178736	NZ_CP054792.1	Pseudomonas aeruginosa strain SE5431	Pseudomonas aeruginosa	Pseudomonas	5	Pseudomonas1
2181179110	NZ_CP069323.1	Pseudomonas aeruginosa strain R06	Pseudomonas aeruginosa	Pseudomonas	5	Pseudomonas1
2181179510	NZ_CP054787.1	Pseudomonas aeruginosa strain HB2011305RE	Pseudomonas aeruginosa	Pseudomonas	5	Pseudomonas1
2181179815	NZ_CP054791.1	Pseudomonas aeruginosa strain SE5430	Pseudomonas aeruginosa	Pseudomonas	5	Pseudomonas1
2181179878	NZ_CP069324.1	Pseudomonas aeruginosa strain R05	Pseudomonas aeruginosa	Pseudomonas	5	Pseudomonas1
2181204282	NZ_CP068678.1	Pseudomonas aeruginosa strain NCCP15783	Pseudomonas aeruginosa	Pseudomonas	5	Pseudomonas1
2181204354	NZ_CP054793.1	Pseudomonas aeruginosa strain SE5452	Pseudomonas aeruginosa	Pseudomonas	5	Pseudomonas1
2181204708	NZ_CP054788.1	Pseudomonas aeruginosa strain YTSY4	Pseudomonas aeruginosa	Pseudomonas	5	Pseudomonas1
2181209890	NZ_CP054790.1	Pseudomonas aeruginosa strain SE5418	Pseudomonas aeruginosa	Pseudomonas	5	Pseudomonas1
2181628492	NZ_CP069336.1	Pseudomonas aeruginosa strain E01	Pseudomonas aeruginosa	Pseudomonas	5	Pseudomonas1
2181630364	NZ_CP069331.1	Pseudomonas aeruginosa strain R09	Pseudomonas aeruginosa	Pseudomonas	5	Pseudomonas1
2181632049	NZ_CP069329.1	Pseudomonas aeruginosa strain R10	Pseudomonas aeruginosa	Pseudomonas	5	Pseudomonas1
2181633795	NZ_CP069334.1	Pseudomonas aeruginosa strain E03	Pseudomonas aeruginosa	Pseudomonas	5	Pseudomonas1
2181634933	NZ_CP069335.1	Pseudomonas aeruginosa strain E02	Pseudomonas aeruginosa	Pseudomonas	5	Pseudomonas1
2181687759	NZ_CP069333.1	Pseudomonas aeruginosa strain R01	Pseudomonas aeruginosa	Pseudomonas	5	Pseudomonas1
2181689544	NZ_CP069327.1	Pseudomonas aeruginosa strain R03	Pseudomonas aeruginosa	Pseudomonas	5	Pseudomonas1
2181711431	NZ_CP069337.1	Pseudomonas aeruginosa strain E04	Pseudomonas aeruginosa	Pseudomonas	5	Pseudomonas1
2181721132	NZ_CP069332.1	Pseudomonas aeruginosa strain R08	Pseudomonas aeruginosa	Pseudomonas	5	Pseudomonas1
2181735867	NZ_CP069328.1	Pseudomonas aeruginosa strain R04	Pseudomonas aeruginosa	Pseudomonas	5	Pseudomonas1
2181762418	NZ_CP069326.1	Pseudomonas aeruginosa strain R11	Pseudomonas aeruginosa	Pseudomonas	5	Pseudomonas1
2181780160	NZ_CP069330.1	Pseudomonas aeruginosa strain R07	Pseudomonas aeruginosa	Pseudomonas	5	Pseudomonas1
2194571239	NZ_CP092032.1	Pseudomonas aeruginosa strain ZS-PA-05	Pseudomonas aeruginosa	Pseudomonas	5	Pseudomonas1
229587578	NC_012660.1	Pseudomonas fluorescens SBW25	Pseudomonas fluorescens	Pseudomonas	6	Pseudomonas2
255961261	NC_007492.2	Pseudomonas fluorescens Pf0-1	Pseudomonas fluorescens	Pseudomonas	6	Pseudomonas2
312964018	NZ_CM001025.1	Pseudomonas fluorescens WH6	Pseudomonas fluorescens	Pseudomonas	6	Pseudomonas2
387891255	NC_017911.1	Pseudomonas fluorescens A506	Pseudomonas fluorescens	Pseudomonas	6	Pseudomonas2
423092765	NZ_CM001558.1	Pseudomonas fluorescens Q2-87	Pseudomonas fluorescens	Pseudomonas	6	Pseudomonas2
423694505	NZ_CM001512.1	Pseudomonas fluorescens Q8r1-96	Pseudomonas fluorescens	Pseudomonas	6	Pseudomonas2
424920626	NZ_CM001561.1	Pseudomonas fluorescens R124	Pseudomonas fluorescens	Pseudomonas	6	Pseudomonas2
749296184	NZ_CP008896.1	Pseudomonas fluorescens strain UK4	Pseudomonas fluorescens	Pseudomonas	6	Pseudomonas2
919926308	NZ_CP010945.1	Pseudomonas fluorescens NCIMB 11764	Pseudomonas fluorescens	Pseudomonas	6	Pseudomonas2
937511190	NZ_CP012830.1	Pseudomonas fluorescens strain FW300-N2E3	Pseudomonas fluorescens	Pseudomonas	6	Pseudomonas2
983593514	NZ_CP012831.1	Pseudomonas fluorescens strain FW300-N2C3	Pseudomonas fluorescens	Pseudomonas	6	Pseudomonas2
1021303120	NZ_CP015225.1	Pseudomonas fluorescens strain FW300-N2E2	Pseudomonas fluorescens	Pseudomonas	6	Pseudomonas2
1060064061	NZ_CP015637.1	Pseudomonas fluorescens strain L321	Pseudomonas fluorescens	Pseudomonas	6	Pseudomonas2
1060068160	NZ_CP015638.1	Pseudomonas fluorescens strain L111	Pseudomonas fluorescens	Pseudomonas	6	Pseudomonas2
1071444414	NZ_CP017296.1	Pseudomonas fluorescens strain Pt14	Pseudomonas fluorescens	Pseudomonas	6	Pseudomonas2
1246019604	NZ_LT907842.1	Pseudomonas fluorescens strain ATCC 13525	Pseudomonas fluorescens	Pseudomonas	6	Pseudomonas2
1383426382	NZ_CP028826.1	Pseudomonas fluorescens strain MS82	Pseudomonas fluorescens	Pseudomonas	6	Pseudomonas2
1409118719	NZ_LS483372.1	Pseudomonas fluorescens strain NCTC10038	Pseudomonas fluorescens	Pseudomonas	6	Pseudomonas2
1442440266	NZ_CP022313.1	Pseudomonas fluorescens strain NEP1	Pseudomonas fluorescens	Pseudomonas	6	Pseudomonas2
1464031993	NZ_CP031648.1	Pseudomonas fluorescens strain Pf275	Pseudomonas fluorescens	Pseudomonas	6	Pseudomonas2
1487846877	NZ_CP031450.1	Pseudomonas fluorescens strain SIK_W1	Pseudomonas fluorescens	Pseudomonas	6	Pseudomonas2
1488284579	NZ_CP032618.1	Pseudomonas fluorescens strain PF08	Pseudomonas fluorescens	Pseudomonas	6	Pseudomonas2
1545193207	NZ_LR134318.1	Pseudomonas fluorescens strain NCTC9428	Pseudomonas fluorescens	Pseudomonas	6	Pseudomonas2
1545279192	NZ_LR134300.1	Pseudomonas fluorescens strain NCTC10783	Pseudomonas fluorescens	Pseudomonas	5	Pseudomonas1
1606814885	NZ_CP025542.1	Pseudomonas fluorescens strain 2P24	Pseudomonas fluorescens	Pseudomonas	6	Pseudomonas2
1608668069	NZ_CP038438.1	Pseudomonas fluorescens strain LBUM677	Pseudomonas fluorescens	Pseudomonas	6	Pseudomonas2
1816950351	NZ_CP048607.1	Pseudomonas fluorescens strain DR133	Pseudomonas fluorescens	Pseudomonas	6	Pseudomonas2
1817079518	NZ_CP048408.1	Pseudomonas fluorescens strain DR397	Pseudomonas fluorescens	Pseudomonas	6	Pseudomonas2
1823467278	LR782234.1	Pseudomonas fluorescens isolate PfAR1	Pseudomonas fluorescens	Pseudomonas	6	Pseudomonas2
1838379740	NZ_CP027561.1	Pseudomonas fluorescens strain G7	Pseudomonas fluorescens	Pseudomonas	6	Pseudomonas2
1868901152	NZ_CP058533.1	Pseudomonas fluorescens strain W-6	Pseudomonas fluorescens	Pseudomonas	6	Pseudomonas2
1927046409	NZ_CP063233.1	Pseudomonas fluorescens strain KF1	Pseudomonas fluorescens	Pseudomonas	6	Pseudomonas2
1957631689	NZ_CP065593.1	Pseudomonas fluorescens BBc6R8	Pseudomonas fluorescens	Pseudomonas	6	Pseudomonas2
1960230386	NZ_CP068151.1	Pseudomonas fluorescens strain FDAARGOS_1088	Pseudomonas fluorescens	Pseudomonas	6	Pseudomonas2
2015735303	NZ_CP071797.1	Pseudomonas fluorescens strain YK-310	Pseudomonas fluorescens	Pseudomonas	6	Pseudomonas2
2021349842	NZ_CP017951.1	Pseudomonas fluorescens strain CREA-C16	Pseudomonas fluorescens	Pseudomonas	6	Pseudomonas2
2026986994	NZ_CP072873.1	Pseudomonas fluorescens strain JNU01	Pseudomonas fluorescens	Pseudomonas	6	Pseudomonas2
2046638082	NZ_CP075566.1	Pseudomonas fluorescens strain G20-18	Pseudomonas fluorescens	Pseudomonas	6	Pseudomonas2
2068264705	NZ_CP078138.1	Pseudomonas fluorescens strain MYb115	Pseudomonas fluorescens	Pseudomonas	6	Pseudomonas2
2130678661	CP081968.1	Pseudomonas fluorescens strain R6-28-08	Pseudomonas fluorescens	Pseudomonas	6	Pseudomonas2
2192069127	NZ_CP059448.1	Pseudomonas fluorescens strain 2020WEIHUA_J	Pseudomonas fluorescens	Pseudomonas	6	Pseudomonas2
167031021	NC_010322.1	Pseudomonas putida GB-1	Pseudomonas putida	Pseudomonas	6	Pseudomonas2
339484941	NC_015733.1	Pseudomonas putida S16	Pseudomonas putida	Pseudomonas	6	Pseudomonas2
386009639	NC_017530.1	Pseudomonas putida BIRD-1	Pseudomonas putida	Pseudomonas	6	Pseudomonas2
395443650	NC_017986.1	Pseudomonas putida ND6	Pseudomonas putida	Pseudomonas	6	Pseudomonas2
397692770	NC_018220.1	Pseudomonas putida DOT-T1E	Pseudomonas putida	Pseudomonas	6	Pseudomonas2
431799958	NC_019905.1	Pseudomonas putida HB3267	Pseudomonas putida	Pseudomonas	6	Pseudomonas2
512576139	NC_021491.1	Pseudomonas putida H8234	Pseudomonas putida	Pseudomonas	6	Pseudomonas2
512683057	NC_021505.1	Pseudomonas putida NBRC 14164	Pseudomonas putida	Pseudomonas	6	Pseudomonas2
749205001	NZ_CP009974.1	Pseudomonas putida S12	Pseudomonas putida	Pseudomonas	6	Pseudomonas2
749295017	NZ_CP007620.1	Pseudomonas putida strain DLL-E4	Pseudomonas putida	Pseudomonas	6	Pseudomonas2
820953769	NZ_CP010979.1	Pseudomonas putida S13.1.2	Pseudomonas putida	Pseudomonas	6	Pseudomonas2
1002825811	NC_002947.4	Pseudomonas putida KT2440	Pseudomonas putida	Pseudomonas	6	Pseudomonas2
1032822481	NZ_CP015202.1	Pseudomonas putida B6-2	Pseudomonas putida	Pseudomonas	6	Pseudomonas2
1035782278	NZ_CP015876.1	Pseudomonas putida SJTE-1	Pseudomonas putida	Pseudomonas	6	Pseudomonas2
1084320316	NZ_CP016212.1	Pseudomonas putida JB	Pseudomonas putida	Pseudomonas	6	Pseudomonas2
1110760853	NZ_CP017073.1	Pseudomonas putida strain PP112420	Pseudomonas putida	Pseudomonas	6	Pseudomonas2
1125703563	NZ_CP018743.1	Pseudomonas putida strain DRA525	Pseudomonas putida	Pseudomonas	6	Pseudomonas2
1134161357	NZ_LT707061.1	Pseudomonas putida strain N1R	Pseudomonas putida	Pseudomonas	6	Pseudomonas2
1159298743	NZ_CP018846.1	Pseudomonas putida strain AA7	Pseudomonas putida	Pseudomonas	6	Pseudomonas2
1160889053	NZ_LT799039.1	Pseudomonas putida strain KT2440	Pseudomonas putida	Pseudomonas	6	Pseudomonas2
1246842752	NZ_AP015029.1	Pseudomonas putida strain KF715	Pseudomonas putida	Pseudomonas	6	Pseudomonas2
1273031728	NZ_CP024086.1	Pseudomonas putida strain E46	Pseudomonas putida	Pseudomonas	6	Pseudomonas2
1273059787	NZ_CP024085.1	Pseudomonas putida strain E41	Pseudomonas putida	Pseudomonas	6	Pseudomonas2
1274410809	NZ_CP016634.1	Pseudomonas putida strain IEC33019	Pseudomonas putida	Pseudomonas	6	Pseudomonas2
1405482442	NZ_CP029693.1	Pseudomonas putida strain JBC17	Pseudomonas putida	Pseudomonas	6	Pseudomonas2
1495574805	NZ_CP022561.1	Pseudomonas putida strain B4	Pseudomonas putida	Pseudomonas	6	Pseudomonas2
1545230685	NZ_LR134299.1	Pseudomonas putida strain NCTC13186	Pseudomonas putida	Pseudomonas	6	Pseudomonas2
1719784254	NZ_CP022560.1	Pseudomonas putida strain B1	Pseudomonas putida	Pseudomonas	6	Pseudomonas2
1750705419	NZ_CP043835.1	Pseudomonas putida strain JYR-1	Pseudomonas putida	Pseudomonas	6	Pseudomonas2
1804726043	NZ_AP022324.1	Pseudomonas putida strain TS312	Pseudomonas putida	Pseudomonas	6	Pseudomonas2
1817090891	NZ_CP026115.2	Pseudomonas putida strain W5	Pseudomonas putida	Pseudomonas	6	Pseudomonas2
1839123320	NZ_CP050951.1	Pseudomonas putida strain JQ581	Pseudomonas putida	Pseudomonas	6	Pseudomonas2
1852251111	NZ_CP045551.1	Pseudomonas putida strain 15420352	Pseudomonas putida	Pseudomonas	6	Pseudomonas2
1878260850	NZ_CP059052.1	Pseudomonas putida strain BS3701	Pseudomonas putida	Pseudomonas	6	Pseudomonas2
1888257682	NZ_CP043576.1	Pseudomonas putida strain T25-27	Pseudomonas putida	Pseudomonas	6	Pseudomonas2
1889803390	NZ_AP022227.1	Pseudomonas putida strain WP8-W18-CRE-01	Pseudomonas putida	Pseudomonas	6	Pseudomonas2
1890106434	NZ_AP022055.1	Pseudomonas putida strain WP4-W18-CRE-03	Pseudomonas putida	Pseudomonas	6	Pseudomonas2
1893332587	NZ_CP046872.1	Pseudomonas putida strain MX-2	Pseudomonas putida	Pseudomonas	6	Pseudomonas2
1910112362	NZ_CP060529.1	Pseudomonas putida strain GIMC5401:PPKH-115	Pseudomonas putida	Pseudomonas	6	Pseudomonas2
1910266827	NZ_CP061723.1	Pseudomonas putida strain ZXPA-20	Pseudomonas putida	Pseudomonas	6	Pseudomonas2
1914548158	NZ_CP062218.1	Pseudomonas putida strain SY153	Pseudomonas putida	Pseudomonas	6	Pseudomonas2
1950547637	NZ_CP066306.1	Pseudomonas putida strain BR-PH17	Pseudomonas putida	Pseudomonas	6	Pseudomonas2
1979395208	CP069317.1	Pseudomonas putida strain R51	Pseudomonas putida	Pseudomonas	6	Pseudomonas2
2037168611	NZ_CP047311.1	Pseudomonas putida strain YC-AE1	Pseudomonas putida	Pseudomonas	6	Pseudomonas2
2073754136	NZ_CP054264.1	Pseudomonas putida strain A0_F0_I1	Pseudomonas putida	Pseudomonas	6	Pseudomonas2
2105223817	NZ_CP083988.1	Pseudomonas putida strain PgBE89	Pseudomonas putida	Pseudomonas	6	Pseudomonas2
2174959310	LR813083.1	Pseudomonas putida isolate BB1451	Pseudomonas putida	Pseudomonas	6	Pseudomonas2
2174970103	LR813085.1	Pseudomonas putida isolate BB1456	Pseudomonas putida	Pseudomonas	6	Pseudomonas2
2198936051	NZ_CP069080.1	Pseudomonas putida strain LWPZF	Pseudomonas putida	Pseudomonas	6	Pseudomonas2
426406915	NC_019670.1	Pseudomonas sp. UW4	Pseudomonas sp.	Pseudomonas	6	Pseudomonas2
557220722	NC_022738.1	Pseudomonas sp. VLB120	Pseudomonas sp.	Pseudomonas	6	Pseudomonas2
568136993	NC_023064.1	Pseudomonas sp. TKP	Pseudomonas sp.	Pseudomonas	6	Pseudomonas2
699964714	AP014655.1	Pseudomonas sp. MT-1 DNA, nearly	Pseudomonas sp.	Pseudomonas	6	Pseudomonas2
740667044	NZ_CP007638.1	Pseudomonas sp. WCS374	Pseudomonas sp.	Pseudomonas	6	Pseudomonas2
749295037	NZ_CP007012.1	Pseudomonas sp. FGI182	Pseudomonas sp.	Pseudomonas	6	Pseudomonas2
780159175	NZ_AP014637.1	Pseudomonas sp. StFLB209	Pseudomonas sp.	Pseudomonas	6	Pseudomonas2
974592869	NZ_LN854573.1	Pseudomonas sp. URMO17WK12:I11 isolate Shine	Pseudomonas sp.	Pseudomonas	6	Pseudomonas2
974593942	NZ_LN865164.1	Pseudomonas sp. URMO17WK12:I11 isolate Yellow	Pseudomonas sp.	Pseudomonas	6	Pseudomonas2
1035797715	NZ_CP011566.1	Pseudomonas sp. DR 5-09	Pseudomonas sp.	Pseudomonas	6	Pseudomonas2
1035820647	NZ_CP011525.1	Pseudomonas sp. JY-Q	Pseudomonas sp.	Pseudomonas	6	Pseudomonas2
1035827852	NZ_CP011567.1	Pseudomonas sp. GR 6-02	Pseudomonas sp.	Pseudomonas	6	Pseudomonas2
1134144036	NZ_LT707062.1	Pseudomonas sp. A214	Pseudomonas sp.	Pseudomonas	6	Pseudomonas2
1134164705	NZ_LT707064.1	Pseudomonas sp. 7SR1	Pseudomonas sp.	Pseudomonas	6	Pseudomonas2
1134328215	NZ_LT707063.1	Pseudomonas sp. B10	Pseudomonas sp.	Pseudomonas	6	Pseudomonas2
1159272056	NZ_CP019947.1	Pseudomonas sp. CC6-YY-74	Pseudomonas sp.	Pseudomonas	6	Pseudomonas2
1160946482	NZ_CP017290.1	Pseudomonas sp. LPH1	Pseudomonas sp.	Pseudomonas	6	Pseudomonas2
1225094174	NZ_LT629756.1	Pseudomonas sp. Z003-0.4C(8344-21)	Pseudomonas sp.	Pseudomonas	6	Pseudomonas2
1225101288	NZ_LT629744.1	Pseudomonas sp. bs2935	Pseudomonas sp.	Pseudomonas	6	Pseudomonas2
1236863021	NZ_CP022960.1	Pseudomonas sp. NS1(2017) strain NS1	Pseudomonas sp.	Pseudomonas	6	Pseudomonas2
1268656374	NZ_CP023969.1	Pseudomonas sp. FDAARGOS_380	Pseudomonas sp.	Pseudomonas	6	Pseudomonas2
1275702122	NZ_CP024478.1	Pseudomonas sp. HLS-6	Pseudomonas sp.	Pseudomonas	6	Pseudomonas2
1314818050	CP025229.1	Pseudomonas sp. AK6U	Pseudomonas sp.	Pseudomonas	5	Pseudomonas1
1316465373	NZ_CP025263.1	Pseudomonas sp. S09G 359	Pseudomonas sp.	Pseudomonas	6	Pseudomonas2
1316637266	NZ_CP025262.1	Pseudomonas sp. 02C 26	Pseudomonas sp.	Pseudomonas	6	Pseudomonas2
1330195453	NZ_CP025624.1	Pseudomonas sp. NC02	Pseudomonas sp.	Pseudomonas	6	Pseudomonas2
1352974452	NZ_CP026676.1	Pseudomonas sp. SWI6	Pseudomonas sp.	Pseudomonas	6	Pseudomonas2
1352976350	NZ_CP026674.1	Pseudomonas sp. SWI44	Pseudomonas sp.	Pseudomonas	6	Pseudomonas2
1353022717	NZ_CP026675.1	Pseudomonas sp. SWI36	Pseudomonas sp.	Pseudomonas	6	Pseudomonas2
1353296924	NZ_CP026880.1	Pseudomonas sp. LH1G9	Pseudomonas sp.	Pseudomonas	6	Pseudomonas2
1353305012	NZ_CP026881.1	Pseudomonas sp. LG1D9	Pseudomonas sp.	Pseudomonas	6	Pseudomonas2
1353459709	NZ_CP026332.1	Pseudomonas sp. XWY-1	Pseudomonas sp.	Pseudomonas	6	Pseudomonas2
1356491875	NZ_CP023269.1	Pseudomonas sp. MYb193	Pseudomonas sp.	Pseudomonas	6	Pseudomonas2
1376226004	NZ_CP024081.1	Pseudomonas sp. s211(2017)	Pseudomonas sp.	Pseudomonas	6	Pseudomonas2
1392503699	NZ_CP029482.1	Pseudomonas sp. 31-12	Pseudomonas sp.	Pseudomonas	6	Pseudomonas2
1423806903	NZ_CP029983.1	Pseudomonas sp. LG1E9	Pseudomonas sp.	Pseudomonas	6	Pseudomonas2
1463576160	NZ_CP031606.1	Pseudomonas sp. phDV1	Pseudomonas sp.	Pseudomonas	6	Pseudomonas2
1488264640	NZ_CP032677.1	Pseudomonas sp. Leaf58	Pseudomonas sp.	Pseudomonas	6	Pseudomonas2
1501349531	NZ_CP033104.1	Pseudomonas sp. LTGT-11-2Z	Pseudomonas sp.	Pseudomonas	6	Pseudomonas2
1525700696	NZ_CP027730.1	Pseudomonas sp. R3-52-08	Pseudomonas sp.	Pseudomonas	6	Pseudomonas2
1525704512	NZ_CP027734.1	Pseudomonas sp. R1-43-08	Pseudomonas sp.	Pseudomonas	6	Pseudomonas2
1525707968	NZ_CP027759.1	Pseudomonas sp. R2-7-07	Pseudomonas sp.	Pseudomonas	6	Pseudomonas2
1525724602	NZ_CP027727.1	Pseudomonas sp. R5-89-07	Pseudomonas sp.	Pseudomonas	6	Pseudomonas2
1525741685	NZ_CP027729.1	Pseudomonas sp. R3-18-08	Pseudomonas sp.	Pseudomonas	6	Pseudomonas2
1525744501	NZ_CP027733.1	Pseudomonas sp. R4-39-08	Pseudomonas sp.	Pseudomonas	6	Pseudomonas2
1525747051	NZ_CP027760.1	Pseudomonas sp. R4-34-07	Pseudomonas sp.	Pseudomonas	6	Pseudomonas2
1525751890	NZ_CP027732.1	Pseudomonas sp. R4-35-07	Pseudomonas sp.	Pseudomonas	6	Pseudomonas2
1525754740	NZ_CP027762.1	Pseudomonas sp. LBUM920	Pseudomonas sp.	Pseudomonas	6	Pseudomonas2
1525757069	NZ_CP027731.1	Pseudomonas sp. R2-60-08W	Pseudomonas sp.	Pseudomonas	6	Pseudomonas2
1525766804	NZ_CP027728.1	Pseudomonas sp. R2-37-08W	Pseudomonas sp.	Pseudomonas	6	Pseudomonas2
1525772229	NZ_CP027761.1	Pseudomonas sp. R11-23-07	Pseudomonas sp.	Pseudomonas	6	Pseudomonas2
1553842199	NZ_CP022411.1	Pseudomonas sp. RU47	Pseudomonas sp.	Pseudomonas	6	Pseudomonas2
1568848522	NZ_CP027218.1	Pseudomonas sp. DTU12.3	Pseudomonas sp.	Pseudomonas	6	Pseudomonas2
1568903354	NZ_CP024866.1	Pseudomonas sp. ACM7	Pseudomonas sp.	Pseudomonas	6	Pseudomonas2
1603698608	NZ_CP038001.1	Pseudomonas sp. SXM-1	Pseudomonas sp.	Pseudomonas	6	Pseudomonas2
1605129108	NZ_CP038207.1	Pseudomonas sp. S150	Pseudomonas sp.	Pseudomonas	6	Pseudomonas2
1679446273	NZ_CP034783.1	Pseudomonas sp. MPC6	Pseudomonas sp.	Pseudomonas	6	Pseudomonas2
1693398065	NZ_CP040930.1	Pseudomonas sp. SWI7	Pseudomonas sp.	Pseudomonas	6	Pseudomonas2
1695465692	NZ_CP025035.2	Pseudomonas sp. SGAir0191	Pseudomonas sp.	Pseudomonas	6	Pseudomonas2
1696686395	NZ_CP041189.1	Pseudomonas sp. NIBRBAC000502773	Pseudomonas sp.	Pseudomonas	6	Pseudomonas2
1716907918	NZ_CP041933.1	Pseudomonas sp. BJP69	Pseudomonas sp.	Pseudomonas	6	Pseudomonas2
1718730474	NZ_CP042180.1	Pseudomonas sp. KBS0802	Pseudomonas sp.	Pseudomonas	6	Pseudomonas2
1718841297	NZ_CP041753.1	Pseudomonas sp. ATCC 43928	Pseudomonas sp.	Pseudomonas	6	Pseudomonas2
1767761954	NZ_AP020337.1	Pseudomonas sp. KUIN-1	Pseudomonas sp.	Pseudomonas	6	Pseudomonas2
1770586329	NZ_CP045416.1	Pseudomonas sp. THAF7b	Pseudomonas sp.	Pseudomonas	6	Pseudomonas2
1774824073	NZ_CP045767.1	Pseudomonas sp. CFSAN084952	Pseudomonas sp.	Pseudomonas	6	Pseudomonas2
1779475126	NZ_CP046103.1	Pseudomonas sp. IB20	Pseudomonas sp.	Pseudomonas	6	Pseudomonas2
1798030395	NZ_CP019396.1	Pseudomonas sp. R32	Pseudomonas sp.	Pseudomonas	6	Pseudomonas2
1798031862	NZ_CP019398.1	Pseudomonas sp. S34	Pseudomonas sp.	Pseudomonas	6	Pseudomonas2
1798736908	NZ_CP045254.1	Pseudomonas sp. DTU12.1	Pseudomonas sp.	Pseudomonas	6	Pseudomonas2
1798765795	NZ_CP019431.1	Pseudomonas sp. S35	Pseudomonas sp.	Pseudomonas	6	Pseudomonas2
1798790156	NZ_CP019428.1	Pseudomonas sp. R76	Pseudomonas sp.	Pseudomonas	6	Pseudomonas2
1798829444	NZ_CP019427.1	Pseudomonas sp. S04	Pseudomonas sp.	Pseudomonas	6	Pseudomonas2
1798875244	NZ_CP019432.1	Pseudomonas sp. S49	Pseudomonas sp.	Pseudomonas	6	Pseudomonas2
1798882847	NZ_CP043060.1	Pseudomonas sp. J380	Pseudomonas sp.	Pseudomonas	6	Pseudomonas2
1798894158	NZ_CP019426.1	Pseudomonas sp. R84	Pseudomonas sp.	Pseudomonas	6	Pseudomonas2
1798944703	NZ_CP019397.1	Pseudomonas sp. S19	Pseudomonas sp.	Pseudomonas	6	Pseudomonas2
1838249534	NZ_CP052859.1	Pseudomonas sp. ADAK18	Pseudomonas sp.	Pseudomonas	6	Pseudomonas2
1838260802	NZ_CP052856.1	Pseudomonas sp. ADAK22	Pseudomonas sp.	Pseudomonas	6	Pseudomonas2
1838266421	NZ_CP052862.1	Pseudomonas sp. ADAK2	Pseudomonas sp.	Pseudomonas	6	Pseudomonas2
1838289311	NZ_CP052860.1	Pseudomonas sp. ADAK13	Pseudomonas sp.	Pseudomonas	6	Pseudomonas2
1838293049	NZ_CP052857.1	Pseudomonas sp. ADAK21	Pseudomonas sp.	Pseudomonas	6	Pseudomonas2
1838351103	NZ_CP052861.1	Pseudomonas sp. ADAK7	Pseudomonas sp.	Pseudomonas	6	Pseudomonas2
1838351136	NZ_CP052858.1	Pseudomonas sp. ADAK20	Pseudomonas sp.	Pseudomonas	6	Pseudomonas2
1840009138	NZ_CP051857.1	Pseudomonas sp. SK	Pseudomonas sp.	Pseudomonas	6	Pseudomonas2
1848832736	NZ_CP053929.1	Pseudomonas sp. B14-6	Pseudomonas sp.	Pseudomonas	6	Pseudomonas2
1850756871	NZ_CP054128.1	Pseudomonas sp. MPDS	Pseudomonas sp.	Pseudomonas	6	Pseudomonas2
1852263371	NZ_CP045554.1	Pseudomonas sp. 14181154	Pseudomonas sp.	Pseudomonas	6	Pseudomonas2
1852269392	NZ_CP045553.1	Pseudomonas sp. 13159349	Pseudomonas sp.	Pseudomonas	6	Pseudomonas2
1857915323	NZ_CP054572.1	Pseudomonas sp. FDAARGOS_761	Pseudomonas sp.	Pseudomonas	5	Pseudomonas1
1860079049	NZ_CP054880.1	Pseudomonas sp. 43A	Pseudomonas sp.	Pseudomonas	6	Pseudomonas2
1868967191	CP058636.1	Pseudomonas sp. DS1	Pseudomonas sp.	Pseudomonas	6	Pseudomonas2
1888229798	NZ_CP059738.1	Pseudomonas sp. 29A	Pseudomonas sp.	Pseudomonas	6	Pseudomonas2
1888253616	NZ_CP059139.1	Pseudomonas sp. MSPm1	Pseudomonas sp.	Pseudomonas	6	Pseudomonas2
1894029984	NZ_CP060008.1	Pseudomonas sp. B11D7D	Pseudomonas sp.	Pseudomonas	6	Pseudomonas2
1910001897	NZ_CP044546.1	Pseudomonas sp. CFA	Pseudomonas sp.	Pseudomonas	6	Pseudomonas2
1914950001	NZ_CP062251.1	Pseudomonas sp. IzPS59	Pseudomonas sp.	Pseudomonas	6	Pseudomonas2
1930680189	NZ_CP063780.1	Pseudomonas sp. OST1909	Pseudomonas sp.	Pseudomonas	6	Pseudomonas2
1956904874	NZ_CP067098.1	Pseudomonas sp. SW-3	Pseudomonas sp.	Pseudomonas	6	Pseudomonas2
1957631459	NZ_CP058975.1	Pseudomonas sp. Y39-6	Pseudomonas sp.	Pseudomonas	6	Pseudomonas2
1969178087	NZ_CP061944.1	Pseudomonas sp. SK2	Pseudomonas sp.	Pseudomonas	6	Pseudomonas2
1995237895	NZ_CP068986.1	Pseudomonas sp. 15A4	Pseudomonas sp.	Pseudomonas	6	Pseudomonas2
1995270400	NZ_CP070506.1	Pseudomonas sp. SDM007	Pseudomonas sp.	Pseudomonas	6	Pseudomonas2
2026944456	NZ_CP072913.1	Pseudomonas sp. Tri1	Pseudomonas sp.	Pseudomonas	6	Pseudomonas2
2037162671	NZ_CP073104.1	Pseudomonas sp. SCA2728.1_7	Pseudomonas sp.	Pseudomonas	6	Pseudomonas2
2037167394	NZ_HG995459.1	Pseudomonas sp. PP3	Pseudomonas sp.	Pseudomonas	6	Pseudomonas2
2037172032	NZ_CP073661.1	Pseudomonas sp. JS425	Pseudomonas sp.	Pseudomonas	6	Pseudomonas2
2039895522	NZ_AP021900.1	Pseudomonas sp. St386	Pseudomonas sp.	Pseudomonas	6	Pseudomonas2
2039900353	NZ_AP021901.1	Pseudomonas sp. St316	Pseudomonas sp.	Pseudomonas	6	Pseudomonas2
2039902378	NZ_AP014703.1	Pseudomonas sp. St290	Pseudomonas sp.	Pseudomonas	6	Pseudomonas2
2039903969	NZ_AP021902.1	Pseudomonas sp. Cab53	Pseudomonas sp.	Pseudomonas	6	Pseudomonas2
2040160156	NZ_AP021903.1	Pseudomonas sp. Seg1	Pseudomonas sp.	Pseudomonas	6	Pseudomonas2
2044993138	NZ_AP021905.1	Pseudomonas sp. Pc102	Pseudomonas sp.	Pseudomonas	5	Pseudomonas1
2060637565	NZ_CP049737.1	Pseudomonas sp. AN-B15	Pseudomonas sp.	Pseudomonas	6	Pseudomonas2
2064747098	NZ_CP077082.1	Pseudomonas sp. OE 28.3	Pseudomonas sp.	Pseudomonas	6	Pseudomonas2
2064870983	NZ_AP017423.2	Pseudomonas sp. LAB-08	Pseudomonas sp.	Pseudomonas	6	Pseudomonas2
2073782825	NZ_CP048411.1	Pseudomonas sp. MTM4	Pseudomonas sp.	Pseudomonas	6	Pseudomonas2
2074330070	NZ_CP080030.1	Pseudomonas sp. Colony2	Pseudomonas sp.	Pseudomonas	6	Pseudomonas2
2077922291	NZ_CP080494.1	Pseudomonas sp. So3.2b	Pseudomonas sp.	Pseudomonas	6	Pseudomonas2
2082576852	NZ_CP071586.1	Pseudomonas sp. FIT28	Pseudomonas sp.	Pseudomonas	6	Pseudomonas2
2082807184	NZ_CP080625.1	Pseudomonas sp. S07E 245	Pseudomonas sp.	Pseudomonas	6	Pseudomonas2
2082812157	NZ_CP080626.1	Pseudomonas sp. S11A 273	Pseudomonas sp.	Pseudomonas	6	Pseudomonas2
2083539725	CP080597.1	Pseudomonas sp. ERGC3:05	Pseudomonas sp.	Pseudomonas	6	Pseudomonas2
2084308728	NZ_CP081200.1	Pseudomonas sp. 3-2	Pseudomonas sp.	Pseudomonas	6	Pseudomonas2
2087073687	NZ_CP079947.1	Pseudomonas sp. AO-1	Pseudomonas sp.	Pseudomonas	6	Pseudomonas2
2088310474	NZ_CP081944.1	Pseudomonas sp. DR208	Pseudomonas sp.	Pseudomonas	6	Pseudomonas2
2088360218	NZ_CP081946.1	Pseudomonas sp. DR48	Pseudomonas sp.	Pseudomonas	6	Pseudomonas2
2089974905	NZ_CP082236.1	Pseudomonas sp. SC3(2021)	Pseudomonas sp.	Pseudomonas	6	Pseudomonas2
2090273309	NZ_CP082271.1	Pseudomonas sp. DNDY-54	Pseudomonas sp.	Pseudomonas	6	Pseudomonas2
2110413435	NZ_OU745390.1	Pseudomonas sp. Marseille-Q3773	Pseudomonas sp.	Pseudomonas	6	Pseudomonas2
2112786513	NZ_CP084484.1	Pseudomonas sp. PS1(2021)	Pseudomonas sp.	Pseudomonas	5	Pseudomonas1
2116517123	NZ_CP081943.1	Pseudomonas sp. MM213	Pseudomonas sp.	Pseudomonas	6	Pseudomonas2
2125066365	NZ_CP065410.1	Pseudomonas sp. IAC-BECa141	Pseudomonas sp.	Pseudomonas	6	Pseudomonas2
2127520495	NZ_CP085704.1	Pseudomonas sp. HN2-3	Pseudomonas sp.	Pseudomonas	6	Pseudomonas2
2128783068	NZ_CP085885.1	Pseudomonas sp. HN2	Pseudomonas sp.	Pseudomonas	6	Pseudomonas2
2130555583	NZ_CP086206.1	Pseudomonas sp. HN8-3	Pseudomonas sp.	Pseudomonas	6	Pseudomonas2
2155552000	NZ_CP087160.1	Pseudomonas sp. CIP-10	Pseudomonas sp.	Pseudomonas	6	Pseudomonas2
2158891044	NZ_CP075567.1	Pseudomonas sp. FIT81	Pseudomonas sp.	Pseudomonas	6	Pseudomonas2
2162105280	NZ_CP088149.1	Pseudomonas sp. S06B 330	Pseudomonas sp.	Pseudomonas	6	Pseudomonas2
2168008078	NZ_CP089304.1	Pseudomonas sp. NIBR-H-19	Pseudomonas sp.	Pseudomonas	6	Pseudomonas2
2169005771	NZ_CP089551.1	Pseudomonas sp. 7-41	Pseudomonas sp.	Pseudomonas	6	Pseudomonas2
2175759556	NZ_CP089985.1	Pseudomonas sp. HN11	Pseudomonas sp.	Pseudomonas	6	Pseudomonas2
2184729400	NZ_CP087138.1	Pseudomonas sp. KNUC1026	Pseudomonas sp.	Pseudomonas	6	Pseudomonas2
2198370302	CP058974.1	Pseudomonas sp. Y5-11	Pseudomonas sp.	Pseudomonas	6	Pseudomonas2
21281729	NC_003923.1	Staphylococcus aureus subsp. aureus MW2	Staphylococcus aureus	Staphylococcus	7	Staphylococcus
29165615	NC_002745.2	Staphylococcus aureus subsp. aureus N315	Staphylococcus aureus	Staphylococcus	7	Staphylococcus
49482253	NC_002952.2	Staphylococcus aureus subsp. aureus MRSA252	Staphylococcus aureus	Staphylococcus	7	Staphylococcus
49484912	NC_002953.3	Staphylococcus aureus subsp. aureus MSSA476	Staphylococcus aureus	Staphylococcus	7	Staphylococcus
57634611	NC_002758.2	Staphylococcus aureus subsp. aureus Mu50	Staphylococcus aureus	Staphylococcus	7	Staphylococcus
57650036	NC_002951.2	Staphylococcus aureus subsp. aureus COL	Staphylococcus aureus	Staphylococcus	7	Staphylococcus
82749777	NC_007622.1	Staphylococcus aureus RF122	Staphylococcus aureus	Staphylococcus	7	Staphylococcus
87159884	NC_007793.1	Staphylococcus aureus subsp. aureus USA300_FPR3757	Staphylococcus aureus	Staphylococcus	7	Staphylococcus
88193823	NC_007795.1	Staphylococcus aureus subsp. aureus NCTC 8325	Staphylococcus aureus	Staphylococcus	7	Staphylococcus
148266447	NC_009487.1	Staphylococcus aureus subsp. aureus JH9	Staphylococcus aureus	Staphylococcus	7	Staphylococcus
151220212	NC_009641.1	Staphylococcus aureus subsp. aureus str. Newman	Staphylococcus aureus	Staphylococcus	7	Staphylococcus
156978331	NC_009782.1	Staphylococcus aureus subsp. aureus Mu3	Staphylococcus aureus	Staphylococcus	7	Staphylococcus
161508266	NC_010079.1	Staphylococcus aureus subsp. aureus USA300_TCH1516	Staphylococcus aureus	Staphylococcus	7	Staphylococcus
269201690	NC_013450.1	Staphylococcus aureus subsp. aureus ED98	Staphylococcus aureus	Staphylococcus	7	Staphylococcus
298527634	NZ_CM000952.1	Staphylococcus aureus subsp. aureus MN8	Staphylococcus aureus	Staphylococcus	7	Staphylococcus
379013365	NC_016912.1	Staphylococcus aureus subsp. aureus VC40	Staphylococcus aureus	Staphylococcus	7	Staphylococcus
384546269	NC_017337.1	Staphylococcus aureus subsp. aureus ED133	Staphylococcus aureus	Staphylococcus	7	Staphylococcus
384548923	NC_017338.1	Staphylococcus aureus subsp. aureus JKD6159	Staphylococcus aureus	Staphylococcus	7	Staphylococcus
384860682	NC_017341.1	Staphylococcus aureus subsp. aureus str. JKD6008	Staphylococcus aureus	Staphylococcus	7	Staphylococcus
384863396	NC_017343.1	Staphylococcus aureus subsp. aureus ECT-R 2	Staphylococcus aureus	Staphylococcus	7	Staphylococcus
384865886	NC_017342.1	Staphylococcus aureus subsp. aureus TCH60	Staphylococcus aureus	Staphylococcus	7	Staphylococcus
384868588	NC_017347.1	Staphylococcus aureus subsp. aureus T0131	Staphylococcus aureus	Staphylococcus	7	Staphylococcus
385780298	NC_017351.1	Staphylococcus aureus subsp. aureus 11819-97	Staphylococcus aureus	Staphylococcus	7	Staphylococcus
386727822	NC_017673.1	Staphylococcus aureus subsp. aureus 71193	Staphylococcus aureus	Staphylococcus	7	Staphylococcus
386829725	NC_017763.1	Staphylococcus aureus subsp. aureus HO 5096 0412	Staphylococcus aureus	Staphylococcus	7	Staphylococcus
387141638	NC_017331.1	Staphylococcus aureus subsp. aureus TW20	Staphylococcus aureus	Staphylococcus	7	Staphylococcus
387149188	NC_017340.1	Staphylococcus aureus 04-02981	Staphylococcus aureus	Staphylococcus	7	Staphylococcus
387601291	NC_017333.1	Staphylococcus aureus subsp. aureus ST398	Staphylococcus aureus	Staphylococcus	7	Staphylococcus
387779217	NC_017349.1	Staphylococcus aureus subsp. aureus LGA251	Staphylococcus aureus	Staphylococcus	7	Staphylococcus
404477334	NC_018608.1	Staphylococcus aureus 08BA02176	Staphylococcus aureus	Staphylococcus	7	Staphylococcus
470190315	NC_020529.1	Staphylococcus aureus subsp. aureus ST228	Staphylococcus aureus	Staphylococcus	7	Staphylococcus
470192280	NC_020532.1	Staphylococcus aureus subsp. aureus ST228	Staphylococcus aureus	Staphylococcus	7	Staphylococcus
470194245	NC_020533.1	Staphylococcus aureus subsp. aureus ST228	Staphylococcus aureus	Staphylococcus	7	Staphylococcus
470196211	NC_020536.1	Staphylococcus aureus subsp. aureus ST228	Staphylococcus aureus	Staphylococcus	7	Staphylococcus
470198176	NC_020537.1	Staphylococcus aureus subsp. aureus ST228	Staphylococcus aureus	Staphylococcus	7	Staphylococcus
470217946	NC_020564.1	Staphylococcus aureus subsp. aureus ST228	Staphylococcus aureus	Staphylococcus	7	Staphylococcus
470221770	NC_020566.1	Staphylococcus aureus subsp. aureus ST228	Staphylococcus aureus	Staphylococcus	7	Staphylococcus
470223734	NC_020568.1	Staphylococcus aureus subsp. aureus ST228	Staphylococcus aureus	Staphylococcus	7	Staphylococcus
479328021	NC_021059.1	Staphylococcus aureus M1	Staphylococcus aureus	Staphylococcus	7	Staphylococcus
514064966	NC_021554.1	Staphylococcus aureus CA-347	Staphylococcus aureus	Staphylococcus	7	Staphylococcus
521210823	NC_021670.1	Staphylococcus aureus	Staphylococcus aureus	Staphylococcus	7	Staphylococcus
532358222	NC_022113.1	Staphylococcus aureus subsp. aureus 55/2053	Staphylococcus aureus	Staphylococcus	7	Staphylococcus
537441500	NC_022222.1	Staphylococcus aureus subsp. aureus 6850	Staphylococcus aureus	Staphylococcus	7	Staphylococcus
537459744	NC_022226.1	Staphylococcus aureus subsp. aureus CN1	Staphylococcus aureus	Staphylococcus	7	Staphylococcus
545633528	NC_022442.1	Staphylococcus aureus subsp. aureus SA957	Staphylococcus aureus	Staphylococcus	7	Staphylococcus
545636471	NC_022443.1	Staphylococcus aureus subsp. aureus SA40	Staphylococcus aureus	Staphylococcus	7	Staphylococcus
554642795	NC_022604.1	Staphylococcus aureus subsp. aureus Z172	Staphylococcus aureus	Staphylococcus	7	Staphylococcus
657154530	CP007447.1	Staphylococcus aureus strain XN108	Staphylococcus aureus	Staphylococcus	7	Staphylococcus
749193063	NZ_CP010298.1	Staphylococcus aureus strain ATCC BAA1680	Staphylococcus aureus	Staphylococcus	7	Staphylococcus
749198600	NZ_CP010295.1	Staphylococcus aureus strain ATCC BAA1680	Staphylococcus aureus	Staphylococcus	7	Staphylococcus
749203622	NZ_CP010296.1	Staphylococcus aureus strain ATCC BAA1680	Staphylococcus aureus	Staphylococcus	7	Staphylococcus
749204325	NZ_CP010300.1	Staphylococcus aureus strain ATCC BAA1680	Staphylococcus aureus	Staphylococcus	7	Staphylococcus
749295035	NZ_CP009361.1	Staphylococcus aureus strain ATCC 25923	Staphylococcus aureus	Staphylococcus	7	Staphylococcus
749295038	NZ_CP007176.1	Staphylococcus aureus USA300-ISMMS1	Staphylococcus aureus	Staphylococcus	7	Staphylococcus
749295044	NZ_CP006630.1	Staphylococcus aureus subsp. aureus SA268	Staphylococcus aureus	Staphylococcus	7	Staphylococcus
749295046	NZ_CP007690.1	Staphylococcus aureus strain UA-S391_USA300 isolate abscess/wound isolate	Staphylococcus aureus	Staphylococcus	7	Staphylococcus
749295050	NZ_CP007659.1	Staphylococcus aureus strain H-EMRSA-15	Staphylococcus aureus	Staphylococcus	7	Staphylococcus
749295051	NZ_CP007454.1	Staphylococcus aureus strain 502A isolate RN6607	Staphylococcus aureus	Staphylococcus	7	Staphylococcus
751258340	NZ_CP010526.1	Staphylococcus aureus subsp. aureus ST772-MRSA-V strain DAR4145	Staphylococcus aureus	Staphylococcus	7	Staphylococcus
754567851	NZ_CP010297.1	Staphylococcus aureus strain ATCC BAA1680	Staphylococcus aureus	Staphylococcus	7	Staphylococcus
754575177	NZ_CP010299.1	Staphylococcus aureus strain ATCC BAA1680	Staphylococcus aureus	Staphylococcus	7	Staphylococcus
755010342	NZ_CP009554.1	Staphylococcus aureus strain FORC_001	Staphylococcus aureus	Staphylococcus	7	Staphylococcus
757462762	NZ_CP007499.1	Staphylococcus aureus strain 2395 USA500	Staphylococcus aureus	Staphylococcus	7	Staphylococcus
757612233	NZ_CP009681.1	Staphylococcus aureus strain Gv69	Staphylococcus aureus	Staphylococcus	7	Staphylococcus
760463627	CP010940.1	Staphylococcus aureus strain 71A_S11 genome	Staphylococcus aureus	Staphylococcus	7	Staphylococcus
760485355	CP010941.1	Staphylococcus aureus strain SA17_S6 genome	Staphylococcus aureus	Staphylococcus	7	Staphylococcus
760491253	CP010943.1	Staphylococcus aureus strain 144_S7 genome	Staphylococcus aureus	Staphylococcus	7	Staphylococcus
760495145	CP010944.1	Staphylococcus aureus strain 79_S10 genome	Staphylococcus aureus	Staphylococcus	7	Staphylococcus
761646437	CP010952.1	Staphylococcus aureus strain 93b_S9 genome	Staphylococcus aureus	Staphylococcus	7	Staphylococcus
771531946	NZ_LN626917.1	Staphylococcus aureus strain ILRI_Eymole1/1 isolate Staphylococcus aureus isolate ILRI_Eymole1/1	Staphylococcus aureus	Staphylococcus	7	Staphylococcus
806462661	NZ_CP011147.1	Staphylococcus aureus strain FCFHV36	Staphylococcus aureus	Staphylococcus	7	Staphylococcus
829611207	NZ_CP007670.1	Staphylococcus aureus strain M121	Staphylococcus aureus	Staphylococcus	7	Staphylococcus
829615601	NZ_CP007674.1	Staphylococcus aureus strain CA15	Staphylococcus aureus	Staphylococcus	7	Staphylococcus
844745958	NZ_CP011528.1	Staphylococcus aureus strain RKI4	Staphylococcus aureus	Staphylococcus	7	Staphylococcus
844757958	NZ_CP011526.1	Staphylococcus aureus strain DSM 20231	Staphylococcus aureus	Staphylococcus	7	Staphylococcus
927544131	NZ_CP010890.1	Staphylococcus aureus strain SA564	Staphylococcus aureus	Staphylococcus	7	Staphylococcus
930161532	NZ_CP010402.1	Staphylococcus aureus strain GR2	Staphylococcus aureus	Staphylococcus	7	Staphylococcus
950816961	NZ_CP007657.1	Staphylococcus aureus strain V2200	Staphylococcus aureus	Staphylococcus	7	Staphylococcus
953523386	NZ_CP013137.1	Staphylococcus aureus strain XQ	Staphylococcus aureus	Staphylococcus	7	Staphylococcus
959863495	NZ_CP009828.1	Staphylococcus aureus strain MS4	Staphylococcus aureus	Staphylococcus	7	Staphylococcus
975875548	NZ_CP012015.1	Staphylococcus aureus strain Gv51	Staphylococcus aureus	Staphylococcus	7	Staphylococcus
975875579	NZ_CP012018.1	Staphylococcus aureus strain Gv88	Staphylococcus aureus	Staphylococcus	7	Staphylococcus
975883094	NZ_CP012012.1	Staphylococcus aureus strain HC1335	Staphylococcus aureus	Staphylococcus	7	Staphylococcus
975889699	NZ_CP012013.1	Staphylococcus aureus strain Be62	Staphylococcus aureus	Staphylococcus	7	Staphylococcus
979591420	NZ_CP012011.1	Staphylococcus aureus strain HC1340	Staphylococcus aureus	Staphylococcus	7	Staphylococcus
983283570	NZ_CP007676.1	Staphylococcus aureus strain HUV05	Staphylococcus aureus	Staphylococcus	7	Staphylococcus
983310191	NZ_CP007672.1	Staphylococcus aureus strain CA12	Staphylococcus aureus	Staphylococcus	7	Staphylococcus
983361205	NZ_LN831036.1	Staphylococcus aureus strain NCTC13435	Staphylococcus aureus	Staphylococcus	7	Staphylococcus
983397541	NZ_CP013619.1	Staphylococcus aureus strain RIVM1607	Staphylococcus aureus	Staphylococcus	7	Staphylococcus
983411767	NZ_CP013616.1	Staphylococcus aureus strain RIVM1295	Staphylococcus aureus	Staphylococcus	7	Staphylococcus
983420869	NZ_CP013621.1	Staphylococcus aureus strain RIVM3897	Staphylococcus aureus	Staphylococcus	7	Staphylococcus
983466147	NZ_CP012593.1	Staphylococcus aureus strain HOU1444-VR	Staphylococcus aureus	Staphylococcus	7	Staphylococcus
983496705	NZ_CP012756.1	Staphylococcus aureus strain JS395	Staphylococcus aureus	Staphylococcus	7	Staphylococcus
985589304	NZ_AP014942.1	Staphylococcus aureus strain FDA209P	Staphylococcus aureus	Staphylococcus	7	Staphylococcus
985589338	NZ_AP017320.1	Staphylococcus aureus strain MI	Staphylococcus aureus	Staphylococcus	7	Staphylococcus
985810609	NZ_AP014653.1	Staphylococcus aureus strain TMUS2134	Staphylococcus aureus	Staphylococcus	7	Staphylococcus
985811988	NZ_AP014652.1	Staphylococcus aureus strain TMUS2126	Staphylococcus aureus	Staphylococcus	7	Staphylococcus
1003968600	NZ_CP010998.1	Staphylococcus aureus strain FORC_012 isolate human sputum	Staphylococcus aureus	Staphylococcus	7	Staphylococcus
1004034021	NZ_CP013231.1	Staphylococcus aureus strain UTSW MRSA 55	Staphylococcus aureus	Staphylococcus	7	Staphylococcus
1005881498	NZ_LT009690.1	Staphylococcus aureus strain NZAK3	Staphylococcus aureus	Staphylococcus	7	Staphylococcus
1006223662	NZ_LN854556.1	Staphylococcus aureus strain BB155	Staphylococcus aureus	Staphylococcus	7	Staphylococcus
1006585648	NZ_CP012409.1	Staphylococcus aureus subsp. aureus Tager 104	Staphylococcus aureus	Staphylococcus	7	Staphylococcus
1008818213	NZ_CP014791.1	Staphylococcus aureus strain MCRF184	Staphylococcus aureus	Staphylococcus	7	Staphylococcus
1016064704	NZ_CP012974.1	Staphylococcus aureus strain ST20130943	Staphylococcus aureus	Staphylococcus	7	Staphylococcus
1016065235	NZ_CP012978.1	Staphylococcus aureus strain ST20130941	Staphylococcus aureus	Staphylococcus	7	Staphylococcus
1016067211	NZ_CP012972.1	Staphylococcus aureus strain ST20130938	Staphylococcus aureus	Staphylococcus	7	Staphylococcus
1016067315	NZ_CP012976.1	Staphylococcus aureus strain ST20130942	Staphylococcus aureus	Staphylococcus	7	Staphylococcus
1016068193	NZ_CP012979.1	Staphylococcus aureus strain ST20130940	Staphylococcus aureus	Staphylococcus	7	Staphylococcus
1016068196	NZ_CP012970.1	Staphylococcus aureus strain ST20130939	Staphylococcus aureus	Staphylococcus	7	Staphylococcus
1016872130	NZ_CP015173.1	Staphylococcus aureus strain RIVM6519	Staphylococcus aureus	Staphylococcus	7	Staphylococcus
1026653763	CP013959.1	Staphylococcus aureus strain V605	Staphylococcus aureus	Staphylococcus	7	Staphylococcus
1027719402	NZ_CP011685.1	Staphylococcus aureus strain ZJ5499	Staphylococcus aureus	Staphylococcus	7	Staphylococcus
1027722058	NZ_CP013957.1	Staphylococcus aureus strain V521 isolate Sequencing	Staphylococcus aureus	Staphylococcus	7	Staphylococcus
1027730329	NZ_CP013953.1	Staphylococcus aureus strain NCCP14558 isolate sequencing	Staphylococcus aureus	Staphylococcus	7	Staphylococcus
1027731475	NZ_CP013955.1	Staphylococcus aureus strain NCCP14562 isolate Sequencing	Staphylococcus aureus	Staphylococcus	7	Staphylococcus
1035834457	NZ_CP015646.1	Staphylococcus aureus strain 08-02300	Staphylococcus aureus	Staphylococcus	7	Staphylococcus
1035861069	NZ_CP015645.1	Staphylococcus aureus strain 08-02119	Staphylococcus aureus	Staphylococcus	7	Staphylococcus
1045302382	NZ_LT598688.1	Staphylococcus aureus isolate Sa_Newman_UoM	Staphylococcus aureus	Staphylococcus	7	Staphylococcus
1065087359	NZ_CP012692.1	Staphylococcus aureus strain FORC_027	Staphylococcus aureus	Staphylococcus	7	Staphylococcus
1073560256	NZ_LT615218.1	Staphylococcus aureus strain AUS0325	Staphylococcus aureus	Staphylococcus	7	Staphylococcus
1103216379	NZ_CP013132.1	Staphylococcus aureus strain FORC_026	Staphylococcus aureus	Staphylococcus	7	Staphylococcus
1103701777	NZ_CP013182.1	Staphylococcus aureus strain SA40TW	Staphylococcus aureus	Staphylococcus	7	Staphylococcus
1110712336	NZ_CP013218.1	Staphylococcus aureus strain LA-MRSA ST398 isolate E154	Staphylococcus aureus	Staphylococcus	7	Staphylococcus
1120547263	NZ_CP018205.1	Staphylococcus aureus strain HG001 isolate RN1	Staphylococcus aureus	Staphylococcus	7	Staphylococcus
1121208216	NZ_LT671859.1	Staphylococcus aureus isolate Clinical isolate	Staphylococcus aureus	Staphylococcus	7	Staphylococcus
1130374198	LT699704.1	Staphylococcus aureus strain NZ15MR0322	Staphylococcus aureus	Staphylococcus	7	Staphylococcus
1133647940	NZ_CP009423.1	Staphylococcus aureus strain USA300_SUR1	Staphylococcus aureus	Staphylococcus	7	Staphylococcus
1133664129	NZ_CP019117.1	Staphylococcus aureus strain SJTUF_J27	Staphylococcus aureus	Staphylococcus	7	Staphylococcus
1140869263	NZ_CP018768.1	Staphylococcus aureus strain UCI 28 isolate ST5	Staphylococcus aureus	Staphylococcus	7	Staphylococcus
1140871389	NZ_CP018766.1	Staphylococcus aureus strain UCI62	Staphylococcus aureus	Staphylococcus	7	Staphylococcus
1145332093	NZ_CP019563.1	Staphylococcus aureus strain SR434	Staphylococcus aureus	Staphylococcus	7	Staphylococcus
1148704599	NZ_CP014397.1	Staphylococcus aureus strain USA300-SUR10	Staphylococcus aureus	Staphylococcus	7	Staphylococcus
1148706190	NZ_CP014415.1	Staphylococcus aureus strain USA300-SUR15	Staphylococcus aureus	Staphylococcus	7	Staphylococcus
1148707587	NZ_CP014432.1	Staphylococcus aureus strain USA300-SUR20	Staphylococcus aureus	Staphylococcus	7	Staphylococcus
1148731632	NZ_CP014407.1	Staphylococcus aureus strain USA300-SUR12	Staphylococcus aureus	Staphylococcus	7	Staphylococcus
1148732192	NZ_CP014409.1	Staphylococcus aureus strain USA300-SUR13	Staphylococcus aureus	Staphylococcus	7	Staphylococcus
1148732416	NZ_CP014423.1	Staphylococcus aureus strain USA300-SUR17	Staphylococcus aureus	Staphylococcus	7	Staphylococcus
1148735161	NZ_CP014426.1	Staphylococcus aureus strain USA300-SUR18	Staphylococcus aureus	Staphylococcus	7	Staphylococcus
1148736830	NZ_CP014438.1	Staphylococcus aureus strain USA300-SUR22	Staphylococcus aureus	Staphylococcus	7	Staphylococcus
1148738567	NZ_CP014441.1	Staphylococcus aureus strain USA300-SUR23	Staphylococcus aureus	Staphylococcus	7	Staphylococcus
1148761550	NZ_CP014402.1	Staphylococcus aureus strain USA300-SUR11	Staphylococcus aureus	Staphylococcus	7	Staphylococcus
1148762539	NZ_CP014420.1	Staphylococcus aureus strain USA300-SUR16	Staphylococcus aureus	Staphylococcus	7	Staphylococcus
1148764233	NZ_CP014435.1	Staphylococcus aureus strain USA300-SUR21	Staphylococcus aureus	Staphylococcus	7	Staphylococcus
1148798492	NZ_CP014392.1	Staphylococcus aureus strain USA300-SUR9	Staphylococcus aureus	Staphylococcus	7	Staphylococcus
1148799775	NZ_CP014412.1	Staphylococcus aureus strain USA300-SUR14	Staphylococcus aureus	Staphylococcus	7	Staphylococcus
1148800449	NZ_CP014429.1	Staphylococcus aureus strain USA300-SUR19	Staphylococcus aureus	Staphylococcus	7	Staphylococcus
1148800891	NZ_CP014444.1	Staphylococcus aureus strain USA300-SUR24	Staphylococcus aureus	Staphylococcus	7	Staphylococcus
1159266388	NZ_CP020020.1	Staphylococcus aureus strain ATCC 6538	Staphylococcus aureus	Staphylococcus	7	Staphylococcus
1159287629	NZ_CP020019.1	Staphylococcus aureus strain 08S00974	Staphylococcus aureus	Staphylococcus	7	Staphylococcus
1172215997	NZ_CP019945.1	Staphylococcus aureus strain BA01611	Staphylococcus aureus	Staphylococcus	7	Staphylococcus
1178555387	NZ_CP020619.1	Staphylococcus aureus strain JE2	Staphylococcus aureus	Staphylococcus	7	Staphylococcus
1181253784	NZ_CP019590.1	Staphylococcus aureus strain C2406	Staphylococcus aureus	Staphylococcus	7	Staphylococcus
1181272736	NZ_CP019592.1	Staphylococcus aureus strain GD5	Staphylococcus aureus	Staphylococcus	7	Staphylococcus
1196918354	NZ_CP015817.1	Staphylococcus aureus strain FORC_039	Staphylococcus aureus	Staphylococcus	7	Staphylococcus
1209313356	NZ_CP021905.1	Staphylococcus aureus strain Seattle 1945 isolate G477	Staphylococcus aureus	Staphylococcus	7	Staphylococcus
1209313698	NZ_CP021907.1	Staphylococcus aureus strain Seattle 1945 isolate G478	Staphylococcus aureus	Staphylococcus	7	Staphylococcus
1209891804	NZ_CP017090.1	Staphylococcus aureus strain ISU935 isolate ST5	Staphylococcus aureus	Staphylococcus	7	Staphylococcus
1209941127	NZ_CP017091.1	Staphylococcus aureus strain ISU926 isolate ST398	Staphylococcus aureus	Staphylococcus	7	Staphylococcus
1212727825	NZ_CP017115.1	Staphylococcus aureus strain FORC_045	Staphylococcus aureus	Staphylococcus	7	Staphylococcus
1214756325	NZ_CP016398.1	Staphylococcus aureus strain FORC_040	Staphylococcus aureus	Staphylococcus	7	Staphylococcus
1246783268	NZ_AP015012.1	Staphylococcus aureus strain No. 10	Staphylococcus aureus	Staphylococcus	7	Staphylococcus
1246792867	NZ_AP017377.1	Staphylococcus aureus strain OC8	Staphylococcus aureus	Staphylococcus	7	Staphylococcus
1246807313	NZ_AP014921.1	Staphylococcus aureus strain JH4899	Staphylococcus aureus	Staphylococcus	7	Staphylococcus
1248556450	NZ_CP023500.1	Staphylococcus aureus strain FDAARGOS_412	Staphylococcus aureus	Staphylococcus	7	Staphylococcus
1249967201	NZ_CP023560.1	Staphylococcus aureus strain NMR08	Staphylococcus aureus	Staphylococcus	7	Staphylococcus
1252873157	NZ_CP020741.1	Staphylococcus aureus strain HZW450	Staphylococcus aureus	Staphylococcus	7	Staphylococcus
1269641087	NZ_CP017685.1	Staphylococcus aureus strain CFSAN007835	Staphylococcus aureus	Staphylococcus	7	Staphylococcus
1269641289	NZ_CP017677.1	Staphylococcus aureus strain CFSAN007894	Staphylococcus aureus	Staphylococcus	7	Staphylococcus
1269649671	NZ_CP017684.1	Staphylococcus aureus strain CFSAN007847	Staphylococcus aureus	Staphylococcus	7	Staphylococcus
1269662722	NZ_CP017682.1	Staphylococcus aureus strain CFSAN007850	Staphylococcus aureus	Staphylococcus	7	Staphylococcus
1269678879	NZ_CP017680.1	Staphylococcus aureus strain CFSAN007851	Staphylococcus aureus	Staphylococcus	7	Staphylococcus
1269678947	NZ_CP017679.1	Staphylococcus aureus strain CFSAN007883	Staphylococcus aureus	Staphylococcus	7	Staphylococcus
1276638748	CP024649.1	Staphylococcus aureus O11	Staphylococcus aureus	Staphylococcus	7	Staphylococcus
1279615777	NZ_CP022290.1	Staphylococcus aureus strain EDCC5458	Staphylococcus aureus	Staphylococcus	7	Staphylococcus
1279617544	NZ_CP022291.1	Staphylococcus aureus strain EDCC5464	Staphylococcus aureus	Staphylococcus	7	Staphylococcus
1279845525	NZ_CP023391.1	Staphylococcus aureus strain Newman_D2C	Staphylococcus aureus	Staphylococcus	7	Staphylococcus
1279845740	NZ_CP023390.1	Staphylococcus aureus subsp. aureus str. Newman strain NYU_Newman	Staphylococcus aureus	Staphylococcus	7	Staphylococcus
1281342513	NZ_CP019574.1	Staphylococcus aureus strain USA400-0051	Staphylococcus aureus	Staphylococcus	7	Staphylococcus
1298137855	NZ_CP024998.1	Staphylococcus aureus strain 55-99-44	Staphylococcus aureus	Staphylococcus	7	Staphylococcus
1316569762	NZ_CP025395.1	Staphylococcus aureus O46	Staphylococcus aureus	Staphylococcus	7	Staphylococcus
1324330658	NZ_CP017094.1	Staphylococcus aureus strain 2148.C01	Staphylococcus aureus	Staphylococcus	7	Staphylococcus
1324480120	NZ_CP016863.1	Staphylococcus aureus strain 1625.C01	Staphylococcus aureus	Staphylococcus	7	Staphylococcus
1325876405	NZ_CP025495.1	Staphylococcus aureus strain 3020.C01	Staphylococcus aureus	Staphylococcus	7	Staphylococcus
1325892476	NZ_CP020713.1	Staphylococcus aureus strain K17	Staphylococcus aureus	Staphylococcus	7	Staphylococcus
1325892574	NZ_CP020714.1	Staphylococcus aureus strain K18	Staphylococcus aureus	Staphylococcus	7	Staphylococcus
1334591134	NZ_CP018629.1	Staphylococcus aureus strain MRSA107	Staphylococcus aureus	Staphylococcus	7	Staphylococcus
1337016008	NZ_CP026068.1	Staphylococcus aureus strain FDAARGOS_24	Staphylococcus aureus	Staphylococcus	7	Staphylococcus
1337016629	NZ_CP026076.1	Staphylococcus aureus strain FDAARGOS_4	Staphylococcus aureus	Staphylococcus	7	Staphylococcus
1337305588	NZ_CP026070.1	Staphylococcus aureus strain FDAARGOS_27	Staphylococcus aureus	Staphylococcus	7	Staphylococcus
1337305819	NZ_CP026071.1	Staphylococcus aureus strain FDAARGOS_30	Staphylococcus aureus	Staphylococcus	7	Staphylococcus
1337306291	NZ_CP026067.1	Staphylococcus aureus strain FDAARGOS_21	Staphylococcus aureus	Staphylococcus	7	Staphylococcus
1337308277	NZ_CP026072.1	Staphylococcus aureus strain FDAARGOS_35	Staphylococcus aureus	Staphylococcus	7	Staphylococcus
1337422688	NZ_CP026066.1	Staphylococcus aureus strain FDAARGOS_20	Staphylococcus aureus	Staphylococcus	7	Staphylococcus
1337423357	NZ_CP026073.1	Staphylococcus aureus strain FDAARGOS_42	Staphylococcus aureus	Staphylococcus	7	Staphylococcus
1337426440	NZ_CP026069.1	Staphylococcus aureus strain FDAARGOS_25	Staphylococcus aureus	Staphylococcus	7	Staphylococcus
1337426880	NZ_CP026063.1	Staphylococcus aureus strain FDAARGOS_14	Staphylococcus aureus	Staphylococcus	7	Staphylococcus
1337818303	NZ_CP026079.1	Staphylococcus aureus strain FDAARGOS_9	Staphylococcus aureus	Staphylococcus	7	Staphylococcus
1337954472	NZ_CP026064.1	Staphylococcus aureus strain FDAARGOS_19	Staphylococcus aureus	Staphylococcus	7	Staphylococcus
1337963548	NZ_CP026074.1	Staphylococcus aureus strain FDAARGOS_47	Staphylococcus aureus	Staphylococcus	7	Staphylococcus
1337994134	NZ_CP026080.1	Staphylococcus aureus strain FDAARGOS_12	Staphylococcus aureus	Staphylococcus	7	Staphylococcus
1338009703	NZ_CP026077.1	Staphylococcus aureus strain FDAARGOS_7	Staphylococcus aureus	Staphylococcus	7	Staphylococcus
1339887070	NZ_CP016861.1	Staphylococcus aureus strain 1969.N	Staphylococcus aureus	Staphylococcus	7	Staphylococcus
1339887103	NZ_CP016856.1	Staphylococcus aureus strain 2148.N	Staphylococcus aureus	Staphylococcus	7	Staphylococcus
1344139377	NZ_CP014064.2	Staphylococcus aureus strain FDAARGOS_159	Staphylococcus aureus	Staphylococcus	7	Staphylococcus
1352525575	NZ_CP026968.1	Staphylococcus aureus strain FDAARGOS_1	Staphylococcus aureus	Staphylococcus	7	Staphylococcus
1352539821	NZ_CP026964.1	Staphylococcus aureus strain FDAARGOS_2	Staphylococcus aureus	Staphylococcus	7	Staphylococcus
1352584595	NZ_CP026962.1	Staphylococcus aureus strain FDAARGOS_6	Staphylococcus aureus	Staphylococcus	7	Staphylococcus
[truncated: 3,128 more rows]

## Sheet: Table S2
Supplementary Table S2: Phage genomes in the reference set
Phage_ref_NCBI	Phage_family	Host_name_from_VirusRefSeq	Phage_genome_size	Phage_lifestyle
NC_000866.4	Myoviridae	Escherichia coli	168903	lytic
NC_000902.1	Podoviridae	Escherichia coli O157:H7	60942	temperate
NC_000924.1	Podoviridae	Escherichia coli O157:H7 str. EDL933	61670	temperate
NC_000929.1	Myoviridae	Escherichia coli	36717	temperate
NC_001416.1	Siphoviridae	Escherichia coli	48502	temperate
NC_001604.1	Podoviridae	Escherichia coli	39937	lytic
NC_001609.1	Myoviridae	Escherichia coli	11624	temperate
NC_001629.1	Siphoviridae	Lactococcus	22195	lytic
NC_001706.1	Siphoviridae	Lactococcus lactis	22172	lytic
NC_001835.1	Siphoviridae	Lactococcus lactis	28451	lytic
NC_001895.1	Myoviridae	Escherichia coli	33593	temperate
NC_001909.1	Siphoviridae	Lactococcus	31754	lytic
NC_002167.1	Siphoviridae	Escherichia coli	39732	temperate
NC_002321.1	Siphoviridae	Staphylococcus aureus	41401	temperate
NC_002371.2	Podoviridae	Salmonella enterica subsp. enterica serovar Typhimurium	41724	temperate
NC_002484.2	Siphoviridae	Pseudomonas aeruginosa	56426	temperate
NC_002486.1	Siphoviridae	Staphylococcus aureus	45636	temperate
NC_002661.2	Siphoviridae	Staphylococcus aureus	42942	temperate
NC_002666.1	Siphoviridae	Lactococcus lactis subsp. lactis Il1403	35538	temperate
NC_002667.1	Siphoviridae	Lactococcus lactis subsp. lactis Il1403	41834	temperate
NC_002668.1	Siphoviridae	Lactococcus lactis subsp. lactis Il1403	36949	temperate
NC_002669.1	Siphoviridae	Lactococcus lactis subsp. lactis Il1403	14957	temperate
NC_002670.1	Siphoviridae	Lactococcus lactis subsp. lactis Il1403	14510	temperate
NC_002671.1	Siphoviridae	Lactococcus lactis subsp. lactis Il1403	15179	temperate
NC_002703.1	Siphoviridae	Lactococcus lactis	38347	temperate
NC_002730.1	Podoviridae	Escherichia coli	38297	temperate
NC_002747.1	Siphoviridae	Lactococcus lactis	37667	temperate
NC_002796.1	Siphoviridae	Lactococcus lactis	40003	temperate
NC_003216.1	Siphoviridae	Listeria monocytogenes	40834	temperate
NC_003278.1	Myoviridae	Pseudomonas aeruginosa	35580	temperate
NC_003288.1	Siphoviridae	Staphylococcus aureus	43081	temperate
NC_003291.2	Siphoviridae	Listeria monocytogenes	37618	temperate
NC_003298.1	Podoviridae	Escherichia coli	38208	lytic
NC_003313.1	Myoviridae	Vibrio cholerae O139	33106	temperate
NC_003356.1	Myoviridae	Escherichia coli	42575	temperate
NC_003444.1	Myoviridae	Shigella flexneri	37074	temperate
NC_003907.2	Podoviridae	Vibrio parahaemolyticus	46012	lytic
NC_004066.1	Siphoviridae	Lactococcus lactis	36798	lytic
NC_004302.1	Siphoviridae	Lactococcus lactis	33350	temperate
NC_004313.1	Unspecified	Salmonella enterica subsp. enterica serovar Typhimurium	40149	temperate
NC_004348.1	Podoviridae	Salmonella enterica subsp. enterica serovar Typhimurium	40679	temperate
NC_004456.1	Myoviridae	Vibrio harveyi	43198	temperate
NC_004615.1	Siphoviridae	Staphylococcus aureus subsp. aureus NCTC 8325	43604	temperate
NC_004616.1	Siphoviridae	Staphylococcus aureus subsp. aureus NCTC 8325	44970	temperate
NC_004617.1	Siphoviridae	Staphylococcus aureus subsp. aureus NCTC 8325	42722	temperate
NC_004665.1	Podoviridae	Pseudomonas putida	37359	lytic
NC_004678.1	Podoviridae	Staphylococcus aureus	16784	lytic
NC_004679.1	Podoviridae	Staphylococcus aureus	18227	lytic
NC_004740.1	Siphoviridae	Staphylococcus aureus subsp. aureus N315	44082	temperate
NC_004746.1	Siphoviridae	Lactococcus lactis	36596	lytic
NC_004775.2	Podoviridae	Salmonella enterica	39672	temperate
NC_004813.1	Siphoviridae	Escherichia coli	57930	temperate
NC_004831.2	Podoviridae	Salmonella enterica subsp. enterica serovar Typhimurium	43769	lytic
NC_004913.3	Podoviridae	Escherichia coli O157:H7	59866	temperate
NC_004914.3	Podoviridae	Escherichia coli O157:H7	62706	temperate
NC_004928.1	Myoviridae	Escherichia coli	167560	lytic
NC_005045.1	Podoviridae	Pseudomonas aeruginosa	42519	lytic
NC_005056.1	Myoviridae	Escherichia coli W	32684	temperate
NC_005066.1	Myoviridae	Escherichia coli	164018	lytic
NC_005083.2	Myoviridae	Vibrio parahaemolyticus	244834	lytic
NC_005178.1	Siphoviridae	Pseudomonas aeruginosa	37611	temperate
NC_005282.1	Myoviridae	Salmonella	86155	lytic
NC_005340.1	Myoviridae	Salmonella	30636	temperate
NC_005344.1	Podoviridae	Shigella flexneri	39043	temperate
NC_005356.1	Siphoviridae	Staphylococcus aureus	41708	temperate
NC_005822.1	Siphoviridae	Lactococcus cremoris	32172	temperate
NC_005833.1	Siphoviridae	Escherichia coli	48836	lytic
NC_005841.1	Podoviridae	Salmonella enterica subsp. enterica serovar Typhimurium str. DT104	41391	temperate
NC_005856.1	Myoviridae	Escherichia coli	94800	temperate
NC_005859.1	Siphoviridae	Escherichia coli	121750	lytic
NC_005879.1	Podoviridae	Vibrio cholerae	39853	temperate
NC_005880.2	Myoviridae	Staphylococcus aureus	148317	lytic
NC_005891.1	Podoviridae	Vibrio cholerae	39786	temperate
NC_006548.1	Siphoviridae	Pseudomonas aeruginosa	38439	temperate
NC_006552.1	Podoviridae	Pseudomonas aeruginosa	65195	temperate
NC_006940.2	Siphoviridae	Salmonella enterica subsp. enterica serovar Typhimurium	40793	lytic
NC_006949.1	Siphoviridae	Salmonella enterica subsp. enterica serovar Typhimurium	46900	temperate
NC_007021.1	Myoviridae	Staphylococcus aureus	130706	lytic
NC_007045.1	Unspecified	Staphylococcus aureus	15603	temperate
NC_007046.1	Podoviridae	Staphylococcus aureus	18199	lytic
NC_007047.1	Siphoviridae	Staphylococcus	39620	temperate
NC_007048.1	Siphoviridae	Staphylococcus aureus	42732	temperate
NC_007049.1	Siphoviridae	Staphylococcus aureus	43883	temperate
NC_007050.1	Siphoviridae	Staphylococcus aureus	44283	temperate
NC_007051.1	Siphoviridae	Staphylococcus aureus	41318	temperate
NC_007052.1	Siphoviridae	Staphylococcus aureus	45861	temperate
NC_007053.1	Siphoviridae	Staphylococcus aureus	43095	temperate
NC_007054.1	Siphoviridae	Staphylococcus aureus	44777	temperate
NC_007055.1	Siphoviridae	Staphylococcus aureus	43681	temperate
NC_007056.1	Siphoviridae	Staphylococcus aureus	45286	temperate
NC_007057.1	Siphoviridae	Staphylococcus aureus	43576	temperate
NC_007058.1	Siphoviridae	Staphylococcus aureus	43155	temperate
NC_007059.1	Siphoviridae	Staphylococcus aureus	43114	temperate
NC_007060.1	Siphoviridae	Staphylococcus aureus	41902	temperate
NC_007061.1	Siphoviridae	Staphylococcus aureus	42802	temperate
NC_007062.1	Siphoviridae	Staphylococcus aureus	41690	temperate
NC_007063.1	Siphoviridae	Staphylococcus aureus	43231	temperate
NC_007064.1	Siphoviridae	Staphylococcus aureus	42431	temperate
NC_007065.1	Siphoviridae	Staphylococcus aureus	43440	temperate
NC_007066.1	Myoviridae	Staphylococcus aureus	138715	lytic
NC_007149.1	Podoviridae	Vibrio	39503	lytic
NC_007291.1	Siphoviridae	Escherichia coli O157:H7	46072	lytic
NC_007456.1	Podoviridae	Escherichia coli	39704	lytic
NC_007603.1	Siphoviridae	Escherichia coli	46219	lytic
NC_007623.1	Myoviridae	Pseudomonas aeruginosa	211215	lytic
NC_007637.1	Podoviridae	Escherichia coli	45251	lytic
NC_007804.2	Podoviridae	Escherichia coli O157:H7	39104	temperate
NC_007805.1	Siphoviridae	Pseudomonas aeruginosa	39199	temperate
NC_008152.1	Podoviridae	Escherichia coli	44385	lytic
NC_008464.1	Podoviridae	Escherichia coli	60238	temperate
NC_008717.1	Siphoviridae	Pseudomonas aeruginosa	36415	temperate
NC_008720.1	Podoviridae	Escherichia coli	70153	lytic
NC_009016.1	Myoviridae	Vibrio parahaemolyticus	38197	temperate
NC_009232.2	Siphoviridae	Salmonella	42572	lytic
NC_009514.1	Siphoviridae	Escherichia coli	47021	temperate
NC_009540.1	Siphoviridae	Escherichia coli B	49902	lytic
NC_009810.1	Siphoviridae	Listeria monocytogenes	38867	temperate
NC_009811.2	Myoviridae	Listeria monocytogenes	137619	lytic
NC_009812.1	Siphoviridae	Listeria monocytogenes	42653	temperate
NC_009813.1	Siphoviridae	Listeria monocytogenes	48172	temperate
NC_009814.1	Siphoviridae	Listeria monocytogenes	35822	lytic
NC_009815.1	Siphoviridae	Listeria monocytogenes	38124	temperate
NC_009818.1	Siphoviridae	Pseudomonas aeruginosa UCBPP-PA14	36409	temperate
NC_009821.1	Myoviridae	Escherichia coli K-12	164270	lytic
NC_010105.1	Myoviridae	Escherichia coli	170523	lytic
NC_010106.1	Myoviridae	Escherichia coli	52975	lytic
NC_010237.1	Podoviridae	Escherichia coli O157:H7	63395	temperate
NC_010324.1	Podoviridae	Escherichia coli	77554	lytic
NC_010325.1	Podoviridae	Pseudomonas aeruginosa	45625	lytic
NC_010463.1	Myoviridae	Salmonella enterica subsp. enterica serovar Typhimurium str. LT2	33693	temperate
NC_010495.1	Siphoviridae	Salmonella enterica	45051	lytic
NC_010583.1	Siphoviridae	Escherichia coli	111382	lytic
NC_010807.1	Podoviridae	Salmonella enterica subsp. enterica serovar Gallinarum	38815	lytic
NC_011040.1	Podoviridae	Escherichia coli	39816	lytic
NC_011041.1	Myoviridae	Escherichia coli O157	137947	lytic
NC_011042.1	Podoviridae	Escherichia coli	39252	lytic
NC_011045.1	Podoviridae	Escherichia coli	38841	lytic
NC_011357.1	Siphoviridae	Escherichia coli O157:H7	62147	temperate
NC_011611.1	Siphoviridae	Pseudomonas aeruginosa PA14	36885	temperate
NC_011613.1	Siphoviridae	Pseudomonas aeruginosa PA14	36632	temperate
NC_011802.1	Podoviridae	Salmonella enterica	41941	temperate
NC_011976.1	Podoviridae	Salmonella enterica subsp. enterica serovar Anatum	43016	temperate
NC_012223.2	Siphoviridae	Escherichia coli	44899	lytic
NC_012662.1	Podoviridae	Vibrio parahaemolyticus	43931	lytic
NC_012740.1	Myoviridae	Escherichia coli K-12	166418	lytic
NC_012741.1	Myoviridae	Escherichia coli K-12	171451	lytic
NC_012749.1	Myoviridae	Escherichia coli O157:H7	88487	lytic
NC_013059.1	Podoviridae	Salmonella enterica subsp. enterica serovar Anatum	40975	temperate
NC_013594.1	Myoviridae	Escherichia coli	37235	temperate
NC_013693.1	Myoviridae	Shigella boydii	158006	lytic
NC_014260.1	Myoviridae	Escherichia coli	172253	lytic
NC_014467.1	Myoviridae	Escherichia coli	176788	lytic
NC_014595.1	Myoviridae	Shigella sonnei	170605	lytic
NC_014662.1	Myoviridae	Escherichia coli	165540	lytic
NC_014792.1	Myoviridae	Escherichia coli	169285	lytic
NC_014900.1	Podoviridae	Salmonella enterica subsp. enterica serovar Typhimurium	40986	temperate
NC_015159.1	Podoviridae	Vibrio cholerae	39162	lytic
NC_015208.1	Podoviridae	Pseudomonas	39562	lytic
NC_015249.1	Podoviridae	Escherichia coli	39270	lytic
NC_015264.1	Podoviridae	Pseudomonas fluorescens	40973	lytic
NC_015269.1	Siphoviridae	Salmonella enterica subsp. enterica serovar Typhimurium	118351	lytic
NC_015271.1	Podoviridae	Salmonella enterica subsp. enterica serovar Typhi	38368	lytic
NC_015296.1	Myoviridae	Salmonella enterica subsp. enterica serovar Typhimurium	157061	lytic
NC_015456.1	Siphoviridae	Shigella flexneri	50661	lytic
NC_015457.1	Myoviridae	Shigella flexneri	165919	lytic
NC_015933.1	Podoviridae	Escherichia	72917	lytic
NC_015938.1	Podoviridae	Salmonella enterica subsp. enterica serovar Newport	89916	lytic
NC_016071.1	Myoviridae	Salmonella enterica subsp. enterica serovar Enteritidis	145964	lytic
NC_016073.1	Myoviridae	Salmonella	157950	lytic
NC_016158.1	Siphoviridae	Escherichia coli	49576	temperate
NC_016160.1	Siphoviridae	Escherichia coli K-12	36661	temperate
NC_016566.1	Siphoviridae	Shigella sonnei	44077	lytic
NC_016570.1	Myoviridae	Escherichia coli O157:H7	157304	lytic
NC_016761.1	Podoviridae	Salmonella	38684	temperate
NC_016763.1	Siphoviridae	Salmonella enterica subsp. enterica serovar Enteritidis	43221	lytic
NC_017969.1	Siphoviridae	Escherichia coli	108853	lytic
NC_017985.1	Podoviridae	Salmonella sp.	40128	temperate
NC_018275.1	Podoviridae	Salmonella	39783	temperate
NC_018279.1	Siphoviridae	Salmonella	49116	temperate
NC_018835.1	Podoviridae	Escherichia coli	77448	lytic
NC_018846.1	Podoviridae	Escherichia coli	60894	temperate
NC_018854.1	Podoviridae	Escherichia coli	69855	lytic
NC_018855.1	Myoviridae	Escherichia coli	169158	lytic
NC_018859.1	Podoviridae	Escherichia coli	77315	lytic
NC_019399.1	Myoviridae	Escherichia coli	167396	lytic
NC_019403.1	Podoviridae	Escherichia coli	43731	lytic
NC_019404.1	Siphoviridae	Escherichia coli	46054	lytic
NC_019417.1	Siphoviridae	Salmonella sp.	59203	lytic
NC_019419.2	Siphoviridae	Escherichia coli O157:H7	43457	lytic
NC_019423.1	Podoviridae	Escherichia coli	72570	lytic
NC_019442.1	Podoviridae	Escherichia coli O103:H25 str. NIPH-11060424	60523	temperate
NC_019445.1	Podoviridae	Escherichia coli O103:H25 str. NIPH-11060424	44784	temperate
NC_019452.1	Myoviridae	Escherichia coli O157:H7	156628	lytic
NC_019457.1	Myoviridae	Vibrio cholerae	44492	temperate
NC_019488.1	Myoviridae	Salmonella enterica subsp. enterica serovar Enteritidis str. LK5	34117	temperate
NC_019500.1	Myoviridae	Escherichia coli	168066	lytic
NC_019501.1	Podoviridae	Escherichia coli	39646	temperate
NC_019503.1	Myoviridae	Escherichia coli	166499	lytic
NC_019505.1	Myoviridae	Escherichia coli	166452	lytic
NC_019517.1	Myoviridae	Escherichia coli	136947	lytic
NC_019520.1	Podoviridae	Escherichia sp.	42608	lytic
NC_019529.1	Siphoviridae	Vibrio parahaemolyticus	111506	lytic
NC_019530.1	Myoviridae	Salmonella enterica subsp. enterica serovar Typhimurium	157785	lytic
NC_019539.1	Siphoviridae	Salmonella enterica subsp. enterica serovar Enteritidis	42391	lytic
NC_019545.1	Siphoviridae	Salmonella enterica subsp. enterica serovar Typhimurium	47355	temperate
NC_019704.1	Siphoviridae	Escherichia coli	44375	temperate
NC_019705.1	Siphoviridae	Escherichia coli	38759	temperate
NC_019706.1	Siphoviridae	Escherichia coli	42780	temperate
NC_019708.1	Siphoviridae	Escherichia coli	37595	temperate
NC_019709.1	Siphoviridae	Escherichia coli	41567	temperate
NC_019710.1	Siphoviridae	Escherichia coli	40710	temperate
NC_019711.1	Siphoviridae	Escherichia coli	47288	temperate
NC_019714.1	Siphoviridae	Escherichia coli	39026	temperate
NC_019715.1	Siphoviridae	Escherichia coli	39578	temperate
NC_019716.1	Siphoviridae	Escherichia coli	44510	temperate
NC_019717.1	Siphoviridae	Escherichia coli	45366	temperate
NC_019718.1	Siphoviridae	Escherichia coli	45805	lytic
NC_019719.1	Siphoviridae	Escherichia coli	41528	temperate
NC_019720.1	Siphoviridae	Escherichia coli	44120	temperate
NC_019721.1	Siphoviridae	Escherichia coli	40029	temperate
NC_019723.1	Siphoviridae	Escherichia coli	47090	temperate
NC_019724.1	Siphoviridae	Escherichia coli	43741	lytic
NC_019725.1	Siphoviridae	Escherichia	50552	lytic
NC_019767.1	Siphoviridae	Escherichia coli	40155	temperate
NC_019768.1	Siphoviridae	Escherichia coli	41468	temperate
NC_019769.1	Siphoviridae	Escherichia coli	38964	temperate
NC_019910.1	Myoviridae	Salmonella	159624	lytic
NC_020079.1	Myoviridae	Escherichia coli	147737	lytic
NC_020414.2	Podoviridae	Salmonella enterica subsp. enterica serovar Typhimurium	43984	lytic
NC_020416.1	Myoviridae	Salmonella enterica	160221	lytic
NC_021062.1	Podoviridae	Pseudomonas fluorescens	40192	lytic
NC_021190.1	Siphoviridae	Escherichia coli	46150	temperate
NC_021331.1	Siphoviridae	Shigella flexneri	51821	lytic
NC_021344.2	Myoviridae	Escherichia coli BL21(DE3)	176227	lytic
NC_021772.1	Podoviridae	Salmonella enterica	72394	lytic
NC_021774.1	Myoviridae	Salmonella enterica	29742	temperate
NC_021775.1	Siphoviridae	Salmonella enterica	42215	lytic
NC_021777.1	Siphoviridae	Salmonella	43447	lytic
NC_021779.1	Siphoviridae	Salmonella enterica	59746	lytic
NC_021780.1	Siphoviridae	Salmonella enterica	59454	lytic
NC_021782.1	Podoviridae	Salmonella enterica	72098	lytic
NC_021783.1	Siphoviridae	Salmonella enterica	59254	lytic
NC_022323.1	Myoviridae	Escherichia coli O157:H7	136910	lytic
NC_022749.1	Myoviridae	Shigella flexneri	39758	temperate
NC_022750.1	Myoviridae	Escherichia coli O157:H7	33628	temperate
NC_022752.1	Siphoviridae	Salmonella enterica subsp. enterica serovar Enteritidis	42665	lytic
NC_022754.1	Siphoviridae	Salmonella enterica subsp. enterica serovar Enteritidis	42749	lytic
NC_022768.1	Myoviridae	Salmonella enterica subsp. enterica serovar Typhimurium	154701	lytic
NC_022772.1	Myoviridae	Salmonella enterica subsp. enterica serovar Enteritidis	156338	lytic
NC_022968.1	Myoviridae	Escherichia coli	148567	lytic
NC_023005.1	Podoviridae	Pseudomonas	41386	lytic
NC_023589.1	Podoviridae	Shigella boydii	71629	lytic
NC_023593.1	Podoviridae	Escherichia coli	76184	lytic
NC_023693.1	Myoviridae	Escherichia coli	148612	lytic
NC_023743.1	Siphoviridae	Escherichia coli CFT073	47180	lytic
NC_023856.1	Myoviridae	Salmonella	152460	lytic
NC_024122.1	Myoviridae	Salmonella	162910	lytic
NC_024124.2	Myoviridae	Escherichia	169148	lytic
NC_024125.2	Myoviridae	Escherichia coli	168470	lytic
NC_024146.1	Siphoviridae	Escherichia coli	56702	lytic
NC_024359.1	Myoviridae	Listeria monocytogenes	133048	lytic
NC_024375.1	Siphoviridae	Listeria monocytogenes	67150	lytic
NC_024383.1	Myoviridae	Listeria monocytogenes	135831	lytic
NC_024384.1	Siphoviridae	Listeria monocytogenes	41156	temperate
NC_024387.1	Siphoviridae	Listeria monocytogenes	43767	temperate
NC_024392.1	Siphoviridae	Listeria monocytogenes	66676	lytic
NC_025441.1	Myoviridae	Escherichia coli O157:H7	66854	lytic
NC_025443.1	Siphoviridae	Salmonella enterica	52869	lytic
NC_025446.1	Myoviridae	Escherichia coli O157:H7	157308	lytic
NC_025449.1	Myoviridae	Escherichia coli O157:H7	166783	lytic
NC_027119.1	Myoviridae	Salmonella enterica subsp. enterica serovar Typhimurium	157498	lytic
NC_027339.1	Myoviridae	Shigella flexneri	38389	temperate
NC_027344.1	Myoviridae	Salmonella	158099	lytic
NC_027351.1	Myoviridae	Salmonella	147745	lytic
NC_027360.1	Myoviridae	Salmonella enterica subsp. enterica	87603	lytic
NC_027364.1	Myoviridae	Escherichia coli O157	348113	lytic
NC_027369.1	Myoviridae	Escherichia coli O157:H7	86231	lytic
NC_027402.1	Myoviridae	Salmonella	240413	lytic
NC_027983.1	Myoviridae	Escherichia coli O157:H7	167435	lytic
NC_027984.1	Podoviridae	Escherichia coli O157:H7	57677	temperate
NC_027993.1	Siphoviridae	Escherichia coli	43587	lytic
NC_027994.1	Siphoviridae	Escherichia coli	41632	lytic
NC_027995.1	Myoviridae	Escherichia coli	41666	lytic
NC_028656.1	Podoviridae	Escherichia coli	65955	temperate

## Sheet: Table S3
Supplementary Table S3: Plasmids in the reference set
Plasmid_GI_NCBI	Plasmid_ref_NCBI	Plasmid_name	Host_strain
10955262	NC_002127.1	Escherichia coli O157:H7 str. Sakai plasmid pOSAK1	Escherichia coli O157:H7 str. Sakai
10955266	NC_002128.1	Escherichia coli O157:H7 str. Sakai plasmid pO157	Escherichia coli O157:H7 str. Sakai
75994447	NC_007414.1	Escherichia coli O157:H7 str. EDL933 plasmid pO157	Escherichia coli O157:H7 str. EDL933
91206245	NC_007941.1	Escherichia coli UTI89 plasmid pUTI89	Escherichia coli UTI89
157149330	NC_009786.1	Escherichia coli O139:H28 str. E24377A plasmid pETEC_80	Escherichia coli O139:H28 str. E24377A
157149399	NC_009787.1	Escherichia coli O139:H28 str. E24377A plasmid pETEC_35	Escherichia coli O139:H28 str. E24377A
157149429	NC_009788.1	Escherichia coli O139:H28 str. E24377A plasmid pETEC_73	Escherichia coli O139:H28 str. E24377A
157149498	NC_009789.1	Escherichia coli O139:H28 str. E24377A plasmid pETEC_6	Escherichia coli O139:H28 str. E24377A
157149504	NC_009790.1	Escherichia coli O139:H28 str. E24377A plasmid pETEC_74	Escherichia coli O139:H28 str. E24377A
157149574	NC_009791.1	Escherichia coli O139:H28 str. E24377A plasmid pETEC_5	Escherichia coli O139:H28 str. E24377A
157412014	NC_009838.1	Escherichia coli APEC O1 plasmid pAPEC-O1-R	Escherichia coli APEC O1
157418083	NC_009837.1	Escherichia coli APEC O1 plasmid pAPEC-O1-ColBM	Escherichia coli APEC O1
170650740	NC_010485.1	Escherichia coli SMS-3-5 plasmid pSMS35_8	Escherichia coli SMS-3-5
170650751	NC_010486.1	Escherichia coli SMS-3-5 plasmid pSMS35_4	Escherichia coli SMS-3-5
170650756	NC_010487.1	Escherichia coli SMS-3-5 plasmid pSMS35_3	Escherichia coli SMS-3-5
170650760	NC_010488.1	Escherichia coli SMS-3-5 plasmid pSMS35_130	Escherichia coli SMS-3-5
209395529	NC_011350.1	Escherichia coli O157:H7 str. EC4115 plasmid pO157	Escherichia coli O157:H7 str. EC4115
209395638	NC_011351.1	Escherichia coli O157:H7 str. EC4115 plasmid pEC4115	Escherichia coli O157:H7 str. EC4115
209916806	NC_011407.1	Escherichia coli SE11 plasmid pSE11-4	Escherichia coli SE11
209916817	NC_011408.1	Escherichia coli SE11 plasmid pSE11-5	Escherichia coli SE11
209916825	NC_011411.1	Escherichia coli SE11 plasmid pSE11-6	Escherichia coli SE11
209916829	NC_011413.1	Escherichia coli SE11 plasmid pSE11-2	Escherichia coli SE11
209921875	NC_011416.1	Escherichia coli SE11 plasmid pSE11-3	Escherichia coli SE11
209921952	NC_011419.1	Escherichia coli SE11 plasmid pSE11-1	Escherichia coli SE11
215274578	NC_011602.1	Escherichia coli O127:H6 str. E2348/69 plasmid pE2348-2	Escherichia coli O127:H6 str. E2348/69
215276192	NC_011603.1	Escherichia coli O127:H6 str. E2348/69 plasmid pMAR2	Escherichia coli O127:H6 str. E2348/69
218454959	NC_011739.1	Escherichia coli UMN026 plasmid p2ESCUM	Escherichia coli UMN026
218534477	NC_011747.1	Escherichia coli S88 plasmid pECOS88	Escherichia coli S88
218692794	NC_011749.1	Escherichia coli UMN026 plasmid p1ESCUM	Escherichia coli UMN026
254667448	NC_013010.1	Escherichia coli O157:H7 str. TW14359 plasmid pO157	Escherichia coli O157:H7 str. TW14359
260718930	NC_013354.1	Escherichia coli O103:H2 str. 12009 plasmid pO103	Escherichia coli O103:H2 str. 12009
260751828	NC_013363.1	Escherichia coli O26:H11 str. 11368 plasmid pO26_3	Escherichia coli O26:H11 str. 11368
260751835	NC_013366.1	Escherichia coli O111:H- str. 11128 plasmid pO111_3	Escherichia coli O111:H- str. 11128
260751908	NC_013367.1	Escherichia coli O111:H- str. 11128 plasmid pO111_4	Escherichia coli O111:H- str. 11128
260751919	NC_013368.1	Escherichia coli O111:H- str. 11128 plasmid pO111_5	Escherichia coli O111:H- str. 11128
260751930	NC_013362.1	Escherichia coli O26:H11 str. 11368 plasmid pO26_2	Escherichia coli O26:H11 str. 11368
260752012	NC_013365.1	Escherichia coli O111:H- str. 11128 plasmid pO111_1	Escherichia coli O111:H- str. 11128
260763802	NC_013369.1	Escherichia coli O26:H11 str. 11368 plasmid pO26_1	Escherichia coli O26:H11 str. 11368
260871126	NC_013370.1	Escherichia coli O111:H- str. 11128 plasmid pO111_2	Escherichia coli O111:H- str. 11128
281427817	NC_013655.1	Escherichia coli SE15 plasmid pECSF1	Escherichia coli SE15
291285839	NC_013942.1	Escherichia coli O55:H7 str. CB9615 plasmid pO55	Escherichia coli O55:H7 str. CB9615
307950758	NC_014543.1	Escherichia coli O26:H11 str. 11368 plasmid pO26_4	Escherichia coli O26:H11 str. 11368
386602509	NC_017630.1	Escherichia coli UM146 plasmid pUM146	Escherichia coli UM146
386607294	NC_017636.1	Escherichia coli W plasmid pRK2	Escherichia coli W
386611788	NC_017637.1	Escherichia coli W plasmid pRK1	Escherichia coli W
386611903	NC_017642.1	Escherichia coli UMNK88 plasmid pUMNK88_91	Escherichia coli UMNK88
386611993	NC_017639.1	Escherichia coli UMNK88 plasmid pUMNK88_K88	Escherichia coli UMNK88
386612081	NC_017640.1	Escherichia coli UMNK88 plasmid pUMNK88_Ent	Escherichia coli UMNK88
386617281	NC_017643.1	Escherichia coli UMNK88 plasmid pUMNK88_Hly	Escherichia coli UMNK88
386617342	NC_017645.1	Escherichia coli UMNK88 plasmid pUMNK88	Escherichia coli UMNK88
386622390	NC_017649.1	Escherichia coli O7:K1 str. CE10 plasmid pCE10C	Escherichia coli O7:K1 str. CE10
386622393	NC_017650.1	Escherichia coli O7:K1 str. CE10 plasmid pCE10D	Escherichia coli O7:K1 str. CE10
386627431	NC_017648.1	Escherichia coli O7:K1 str. CE10 plasmid pCE10B	Escherichia coli O7:K1 str. CE10
386627436	NC_017647.1	Escherichia coli O7:K1 str. CE10 plasmid pCE10A	Escherichia coli O7:K1 str. CE10
386637348	NC_017629.1	Escherichia coli ABU 83972 plasmid pABU	Escherichia coli ABU 83972
386703202	NC_017661.1	Escherichia coli KO11FL plasmid pRK2	Escherichia coli KO11FL
386707609	NC_017662.1	Escherichia coli W plasmid pRK2	Escherichia coli W
386707622	NC_017665.1	Escherichia coli W plasmid pRK1	Escherichia coli W
387504713	NC_017658.1	Escherichia coli O55:H7 str. RM12579 plasmid p12579_4	Escherichia coli O55:H7 str. RM12579
387504721	NC_017653.1	Escherichia coli O55:H7 str. RM12579 plasmid p12579_1	Escherichia coli O55:H7 str. RM12579
387504828	NC_017654.1	Escherichia coli O55:H7 str. RM12579 plasmid p12579_3	Escherichia coli O55:H7 str. RM12579
387504844	NC_017657.1	Escherichia coli O55:H7 str. RM12579 plasmid p12579_2	Escherichia coli O55:H7 str. RM12579
387504924	NC_017655.1	Escherichia coli O55:H7 str. RM12579 plasmid p12579_5	Escherichia coli O55:H7 str. RM12579
387604868	NC_017627.1	Escherichia coli 042 plasmid pAA	Escherichia coli 042
387610311	NC_017722.1	Escherichia coli ETEC H10407 plasmid p666	Escherichia coli ETEC H10407
387610385	NC_017724.1	Escherichia coli ETEC H10407 plasmid p948	Escherichia coli ETEC H10407
387615175	NC_017721.1	Escherichia coli ETEC H10407 plasmid p52	Escherichia coli ETEC H10407
387615182	NC_017723.1	Escherichia coli ETEC H10407 plasmid p58	Escherichia coli ETEC H10407
387615190	NC_017659.1	Escherichia coli O83:H1 str. NRG 857C plasmid pO83_CORR	Escherichia coli O83:H1 str. NRG 857C
387873357	NC_017903.1	Escherichia coli Xuzhou21 plasmid pO157_Sal	Escherichia coli Xuzhou21
387885599	NC_017907.1	Escherichia coli Xuzhou21 plasmid pO157	Escherichia coli Xuzhou21
407471876	NC_018662.1	Escherichia coli O104:H4 str. 2009EL-2071 plasmid pAA-09EL71	Escherichia coli O104:H4 str. 2009EL-2071
407471978	NC_018663.1	Escherichia coli O104:H4 str. 2009EL-2071 plasmid pG-09EL71	Escherichia coli O104:H4 str. 2009EL-2071
407484675	NC_018659.1	Escherichia coli O104:H4 str. 2011C-3493 plasmid pESBL-EA11	Escherichia coli O104:H4 str. 2011C-3493
407484773	NC_018660.1	Escherichia coli O104:H4 str. 2011C-3493 plasmid pG-EA11	Escherichia coli O104:H4 str. 2011C-3493
407484805	NC_018666.1	Escherichia coli O104:H4 str. 2011C-3493 plasmid pAA-EA11	Escherichia coli O104:H4 str. 2011C-3493
410480049	NC_018652.1	Escherichia coli O104:H4 str. 2009EL-2050 plasmid pG-09EL50	Escherichia coli O104:H4 str. 2009EL-2050
410480052	NC_018654.1	Escherichia coli O104:H4 str. 2009EL-2050 plasmid pAA-09EL50	Escherichia coli O104:H4 str. 2009EL-2050
410485110	NC_018651.1	Escherichia coli O104:H4 str. 2009EL-2050 plasmid p09EL50	Escherichia coli O104:H4 str. 2009EL-2050
418306131	NZ_AGTD01000002.1	Escherichia coli UMNF18 plasmid pUMNF18_IncI1	Escherichia coli UMNF18
418306202	NZ_AGTD01000003.1	Escherichia coli UMNF18 plasmid pUMNF18_87	Escherichia coli UMNF18
418306290	NZ_AGTD01000004.1	Escherichia coli UMNF18 plasmid pUMNF18_IncFV	Escherichia coli UMNF18
418306393	NZ_AGTD01000005.1	Escherichia coli UMNF18 plasmid pUMNF18_103	Escherichia coli UMNF18
418306482	NZ_AGTD01000006.1	Escherichia coli UMNF18 plasmid pUMNF18_32	Escherichia coli UMNF18
544579032	NC_022371.1	Escherichia coli PMV-1 plasmid pHUSEC411like	Escherichia coli PMV-1
556555082	NC_022649.1	Escherichia coli JJ1886 plasmid pJJ1886_2	Escherichia coli JJ1886
556555098	NC_022650.1	Escherichia coli JJ1886 plasmid pJJ1886_4	Escherichia coli JJ1886
556555179	NC_022651.1	Escherichia coli JJ1886 plasmid pJJ1886_5	Escherichia coli JJ1886
556579581	NC_022661.1	Escherichia coli JJ1886 plasmid pJJ1886_1	Escherichia coli JJ1886
556579591	NC_022662.1	Escherichia coli JJ1886 plasmid pJJ1886_3	Escherichia coli JJ1886
557229649	NC_022742.1	Escherichia coli plasmid pHUSEC2011-1	Escherichia coli strain HUSEC2011
557231365	NC_022743.1	Escherichia coli plasmid pHUSEC2011-2	Escherichia coli strain HUSEC2011
557368453	NC_022741.1	Escherichia coli plasmid pHUSEC2011-3	Escherichia coli strain HUSEC2011
664698202	CP005999.1	Escherichia coli B7A plasmid pEB1	Escherichia coli B7A
664698310	CP006000.1	Escherichia coli B7A plasmid pEB2	Escherichia coli B7A
664698378	CP006001.1	Escherichia coli B7A plasmid pEB3	Escherichia coli B7A
664698464	CP006002.1	Escherichia coli B7A plasmid pEB4	Escherichia coli B7A
693169241	NZ_CBTO010000001.1	Escherichia coli PMV-1 plasmid pECOS88like	Escherichia coli PMV-1
693169245	NZ_CBTO010000002.1	Escherichia coli PMV-1 plasmid pECOS88like	Escherichia coli PMV-1
731486946	CP007150.1	Escherichia coli RS218 plasmid pRS218	Escherichia coli RS218
749199393	NZ_CP005931.1	Escherichia coli APEC IMT5155 plasmid p1ColV5155	Escherichia coli APEC IMT5155
749199404	NZ_CP005932.1	Escherichia coli APEC IMT5155 plasmid p25155	Escherichia coli APEC IMT5155
749204397	NZ_CP009105.1	Escherichia coli strain RM9387 plasmid pO104_H7	Escherichia coli strain RM9387
749205891	NZ_CP009107.1	Escherichia coli strain 94-3024 plasmid pO104_H21	Escherichia coli strain 94-3024
749298790	NZ_CP009579.1	Escherichia coli FAP1 plasmid unnamed 1	Escherichia coli FAP1
749298794	NZ_CP009580.1	Escherichia coli FAP1 plasmid unnamed 2	Escherichia coli FAP1
749298798	NZ_CP009581.1	Escherichia coli FAP1 plasmid unnamed 3	Escherichia coli FAP1
749298801	NZ_CP009582.1	Escherichia coli FAP1 plasmid unnamed 4	Escherichia coli FAP1
749301877	NZ_CP008806.1	Escherichia coli O157:H7 str. SS17 plasmid p0157	Escherichia coli O157:H7 str. SS17
749301884	NZ_CP008807.1	Escherichia coli O157:H7 str. SS17 plasmid pSS17	Escherichia coli O157:H7 str. SS17
749301963	NZ_CP009073.1	Escherichia coli ATCC 25922 plasmid unnamed_1	Escherichia coli ATCC 25922
749301965	NZ_CP009074.1	Escherichia coli ATCC 25922 plasmid unnamed_2	Escherichia coli ATCC 25922
749302053	NZ_CP006263.1	Escherichia coli O145:H28 str. RM13516 plasmid pO145-13516	Escherichia coli O145:H28 str. RM13516
749302054	NZ_CP006264.1	Escherichia coli O145:H28 str. RM13516 plasmid pRM13516	Escherichia coli O145:H28 str. RM13516
749302095	NZ_CP008958.1	Escherichia coli O157:H7 str. EDL933 plasmid unnamed	Escherichia coli O157:H7 str. EDL933
749302188	NZ_CP007137.1	Escherichia coli O145:H28 str. RM12581 plasmid pRM12581	Escherichia coli O145:H28 str. RM12581
749302190	NZ_CP007138.1	Escherichia coli O145:H28 str. RM12581 plasmid pO145-12581	Escherichia coli O145:H28 str. RM12581
749302221	NZ_CP006028.1	Escherichia coli O145:H28 str. RM13514 plasmid pO145-13514	Escherichia coli O145:H28 str. RM13514
749302222	NZ_CP006029.1	Escherichia coli O145:H28 str. RM13514 plasmid pRM13514	Escherichia coli O145:H28 str. RM13514
749304564	NZ_CP007134.1	Escherichia coli O145:H28 str. RM12761 plasmid pRM12761	Escherichia coli O145:H28 str. RM12761
749304572	NZ_CP007135.1	Escherichia coli O145:H28 str. RM12761 plasmid pO145-12761	Escherichia coli O145:H28 str. RM12761
751908853	NZ_CP009167.1	Escherichia coli 1303 plasmid p1303_109	Escherichia coli 1303
751908868	NZ_CP009168.1	Escherichia coli 1303 plasmid p1303_95	Escherichia coli 1303
751908869	NZ_CP009169.1	Escherichia coli 1303 plasmid p1303_5	Escherichia coli 1303
844749278	NZ_CP006637.1	Escherichia coli PCN061 plasmid PCN061p1	Escherichia coli PCN061
844749286	NZ_CP006638.1	Escherichia coli PCN061 plasmid PCN061p2	Escherichia coli PCN061
844749291	NZ_CP006639.1	Escherichia coli PCN061 plasmid PCN061p3	Escherichia coli PCN061
844749302	NZ_CP006640.1	Escherichia coli PCN061 plasmid PCN061p4	Escherichia coli PCN061
844749346	NZ_CP006641.1	Escherichia coli PCN061 plasmid PCN061p5	Escherichia coli PCN061
844749410	NZ_CP006642.1	Escherichia coli PCN061 plasmid PCN061p6	Escherichia coli PCN061
844788474	NZ_CP006633.1	Escherichia coli PCN033 plasmid p1PCN033	Escherichia coli PCN033
844788477	NZ_CP006634.1	Escherichia coli PCN033 plasmid p2PCN033	Escherichia coli PCN033
844788515	NZ_CP006635.1	Escherichia coli PCN033 plasmid p3PCN033	Escherichia coli PCN033
973715451	CP013836.1	Escherichia coli strain JJ1897 plasmid pJJ1897_1	Escherichia coli strain JJ1897
983532904	NZ_CP008715.1	Escherichia coli strain ST648 isolate Pleural Effusion of Patients with Empyema Thoracis plasmid pEC648_1	Escherichia coli strain ST648 isolate Pleural Effusion of Patients with Empyema Thoracis
983532905	NZ_CP008716.1	Escherichia coli strain ST648 isolate Pleural Effusion of Patients with Empyema Thoracis plasmid pEC648_2	Escherichia coli strain ST648 isolate Pleural Effusion of Patients with Empyema Thoracis
983532906	NZ_CP008717.1	Escherichia coli strain ST648 isolate Pleural Effusion of Patients with Empyema Thoracis plasmid pEC648_3	Escherichia coli strain ST648 isolate Pleural Effusion of Patients with Empyema Thoracis
983532907	NZ_CP008718.1	Escherichia coli strain ST648 isolate Pleural Effusion of Patients with Empyema Thoracis plasmid pEC648_4	Escherichia coli strain ST648 isolate Pleural Effusion of Patients with Empyema Thoracis
983532908	NZ_CP008719.1	Escherichia coli strain ST648 isolate Pleural Effusion of Patients with Empyema Thoracis plasmid pEC648_5	Escherichia coli strain ST648 isolate Pleural Effusion of Patients with Empyema Thoracis
983532909	NZ_CP008720.1	Escherichia coli strain ST648 isolate Pleural Effusion of Patients with Empyema Thoracis plasmid pEC648_6	Escherichia coli strain ST648 isolate Pleural Effusion of Patients with Empyema Thoracis
983532910	NZ_CP008721.1	Escherichia coli strain ST648 isolate Pleural Effusion of Patients with Empyema Thoracis plasmid pEC648_7	Escherichia coli strain ST648 isolate Pleural Effusion of Patients with Empyema Thoracis
984301579	CP014199.1	Escherichia coli strain MRE600 plasmid pMRE600-1	Escherichia coli strain MRE600
984301663	CP014200.1	Escherichia coli strain MRE600 plasmid pMRE600-2	Escherichia coli strain MRE600
998246476	CP014198.2	Escherichia coli strain MRE600 plasmid pColE1-MRE600	Escherichia coli strain MRE600
999953922	CP014493.1	Escherichia coli strain MVAST0167 plasmid pMVAST0167_1	Escherichia coli strain MVAST0167
999954047	CP014494.1	Escherichia coli strain MVAST0167 plasmid pMVAST0167_2	Escherichia coli strain MVAST0167
1062509145	CP012494.1	Escherichia coli strain CFSAN004177 plasmid pCFSAN004177G_03	Escherichia coli strain CFSAN004177
1062509255	CP012495.1	Escherichia coli strain CFSAN004177 plasmid pCFSAN004177P_02	Escherichia coli strain CFSAN004177
1062509301	CP012496.1	Escherichia coli strain CFSAN004177 plasmid pCFSAN004177P_01	Escherichia coli strain CFSAN004177
1151149810	CP018958.1	Escherichia coli strain Ecol_422 plasmid pEC422_4	Escherichia coli strain Ecol_422
1151149884	CP018959.1	Escherichia coli strain Ecol_422 plasmid pEC422_KPC	Escherichia coli strain Ecol_422
1151149948	CP018960.1	Escherichia coli strain Ecol_422 plasmid pEC422_2	Escherichia coli strain Ecol_422
1151150048	CP018961.1	Escherichia coli strain Ecol_422 plasmid pEC422_1	Escherichia coli strain Ecol_422
1196986588	NZ_CM007916.1	Escherichia coli TW10598 plasmid pTW10598_12	Escherichia coli TW10598
1196986589	NZ_CM007917.1	Escherichia coli TW10598 plasmid pTW10598_55	Escherichia coli TW10598
1214590782	CP012113.1	Escherichia coli strain PSUO78 plasmid pPSUO78_1	Escherichia coli strain PSUO78
1214590884	CP012114.1	Escherichia coli strain PSUO78 plasmid pPSUO78_2	Escherichia coli strain PSUO78
1214595373	CP014753.1	Escherichia coli strain PSUO103 plasmid	Escherichia coli strain PSUO103
1246842797	NZ_AP017621.1	Escherichia coli strain MRY15-131 plasmid pMRY15-131_1	Escherichia coli strain MRY15-131
1246842798	NZ_AP017622.1	Escherichia coli strain MRY15-131 plasmid pMRY15-131_2	Escherichia coli strain MRY15-131
1246902091	NZ_AP017618.1	Escherichia coli strain MRY15-117 plasmid pMRY15-117_1	Escherichia coli strain MRY15-117
1246902098	NZ_AP017619.1	Escherichia coli strain MRY15-117 plasmid pMRY15-117_2	Escherichia coli strain MRY15-117
1246905599	NZ_AP017611.1	Escherichia coli strain 20Ec-P-124 plasmid pMRY16-002_1	Escherichia coli strain 20Ec-P-124
1246905648	NZ_AP017612.1	Escherichia coli strain 20Ec-P-124 plasmid pMRY16-002_2	Escherichia coli strain 20Ec-P-124
1246905680	NZ_AP017613.1	Escherichia coli strain 20Ec-P-124 plasmid pMRY16-002_3	Escherichia coli strain 20Ec-P-124
1246905721	NZ_AP017614.1	Escherichia coli strain 20Ec-P-124 plasmid pMRY16-002_4	Escherichia coli strain 20Ec-P-124
1246905729	NZ_AP017615.1	Escherichia coli strain 20Ec-P-124 plasmid pMRY16-002_5	Escherichia coli strain 20Ec-P-124
1246905733	NZ_AP017616.1	Escherichia coli strain 20Ec-P-124 plasmid pMRY16-002_6	Escherichia coli strain 20Ec-P-124
1273278979	CP024238.1	Escherichia coli O15:H11 strain 90-9272 plasmid unnamed	Escherichia coli O15:H11 strain 90-9272
1273278993	CP024249.1	Escherichia coli O182:H21 strain D181 plasmid unnamed1	Escherichia coli O182:H21 strain D181
1273278994	CP024250.1	Escherichia coli O182:H21 strain D181 plasmid unnamed2	Escherichia coli O182:H21 strain D181
1273278995	CP024251.1	Escherichia coli O182:H21 strain D181 plasmid unnamed3	Escherichia coli O182:H21 strain D181
1273278997	CP024253.1	Escherichia coli O182:H21 strain D181 plasmid unnamed4	Escherichia coli O182:H21 strain D181
1273279011	CP024267.1	Escherichia coli O6:H16 strain F6699 plasmid unnamed1	Escherichia coli O6:H16 strain F6699
1273279012	CP024268.1	Escherichia coli O6:H16 strain F6699 plasmid unnamed2	Escherichia coli O6:H16 strain F6699
1319594722	CP024156.1	Escherichia coli strain 14EC047 plasmid p14EC047a	Escherichia coli strain 14EC047
1319594779	CP024157.1	Escherichia coli strain 14EC047 plasmid p14EC047b	Escherichia coli strain 14EC047
1319594874	CP024158.1	Escherichia coli strain 14EC047 plasmid p14EC047c	Escherichia coli strain 14EC047
1370526394	CP027345.1	Escherichia coli strain 2014C-3946 plasmid unnamed1	Escherichia coli strain 2014C-3946
1370526395	CP027346.1	Escherichia coli strain 2014C-3946 plasmid unnamed2	Escherichia coli strain 2014C-3946
1370526404	CP027485.1	Escherichia coli strain 2013C-4390 plasmid unnamed	Escherichia coli strain 2013C-4390
1370526426	CP027377.1	Escherichia coli strain 2013C-4404 plasmid unnamed1	Escherichia coli strain 2013C-4404
1370526427	CP027378.1	Escherichia coli strain 2013C-4404 plasmid unnamed2	Escherichia coli strain 2013C-4404
1370526428	CP027379.1	Escherichia coli strain 2013C-4404 plasmid unnamed3	Escherichia coli strain 2013C-4404
1370526488	CP027641.1	Escherichia coli strain 2014C-4705 plasmid unnamed	Escherichia coli strain 2014C-4705
1370526510	CP027673.1	Escherichia coli strain 2014C-3003 plasmid unnamed1	Escherichia coli strain 2014C-3003
1370526511	CP027674.1	Escherichia coli strain 2014C-3003 plasmid unnamed2	Escherichia coli strain 2014C-3003
1370526526	CP027676.1	Escherichia coli strain 88-3510 plasmid unnamed	Escherichia coli strain 88-3510
1370526533	CP027764.1	Escherichia coli strain 2015C-3125 plasmid unnamed1	Escherichia coli strain 2015C-3125
1370526534	CP027765.1	Escherichia coli strain 2015C-3125 plasmid unnamed2	Escherichia coli strain 2015C-3125
1391729341	CP028705.1	Escherichia coli strain VH1 plasmid pVH1	Escherichia coli strain VH1
1468516121	NZ_CP009051.1	Escherichia coli NCCP15648 plasmid p15648-1	Escherichia coli NCCP15648
1468516122	NZ_CP009052.1	Escherichia coli NCCP15648 plasmid p15648-2	Escherichia coli NCCP15648
1468516123	NZ_CP009053.1	Escherichia coli NCCP15648 plasmid p15648-3	Escherichia coli NCCP15648
1473065208	CP022610.1	Escherichia coli strain ATCC 700415 plasmid unnamed	Escherichia coli strain ATCC 700415
1545125955	NZ_AP018797.1	Escherichia coli strain E2855 plasmid pE2855-1	Escherichia coli strain E2855
1545126008	NZ_AP018798.1	Escherichia coli strain E2855 plasmid pE2855-2	Escherichia coli strain E2855
1545126056	NZ_AP018799.1	Escherichia coli strain E2855 plasmid pE2855-3	Escherichia coli strain E2855
1545126085	NZ_AP018800.1	Escherichia coli strain E2855 plasmid pE2855-4	Escherichia coli strain E2855
1545126114	NZ_AP018801.1	Escherichia coli strain E2855 plasmid pE2855-5	Escherichia coli strain E2855
1545170947	NZ_AP018809.1	Escherichia coli strain E2865 plasmid pE2865-1	Escherichia coli strain E2865
1545170948	NZ_AP018810.1	Escherichia coli strain E2865 plasmid pE2865-2	Escherichia coli strain E2865
1545170949	NZ_AP018811.1	Escherichia coli strain E2865 plasmid pE2865-3	Escherichia coli strain E2865
1545170950	NZ_AP018812.1	Escherichia coli strain E2865 plasmid pE2865-4	Escherichia coli strain E2865
1545171309	NZ_AP018785.1	Escherichia coli strain SK1144 plasmid pSK1144	Escherichia coli strain SK1144
1545178633	NZ_AP018803.1	Escherichia coli strain E2863 plasmid pE2863-1	Escherichia coli strain E2863
1545178634	NZ_AP018804.1	Escherichia coli strain E2863 plasmid pE2863-2	Escherichia coli strain E2863
1545178635	NZ_AP018805.1	Escherichia coli strain E2863 plasmid pE2863-3	Escherichia coli strain E2863
1545178636	NZ_AP018806.1	Escherichia coli strain E2863 plasmid pE2863-4	Escherichia coli strain E2863
1545178643	NZ_AP018807.1	Escherichia coli strain E2863 plasmid pE2863-5	Escherichia coli strain E2863
1545274897	NZ_AP018489.1	Escherichia coli O157:H7 strain PV15-279 plasmid pO157pv15279	Escherichia coli O157:H7 strain PV15-279
1551450609	CP034785.1	Escherichia coli strain ECZP248 plasmid pTBMCR401	Escherichia coli strain ECZP248
1551450828	CP034786.1	Escherichia coli strain ECZP248 plasmid pTB402	Escherichia coli strain ECZP248
1566441068	CP026642.1	Escherichia coli strain FORC_082 plasmid pFORC82_1	Escherichia coli strain FORC_082
1566441427	CP026643.1	Escherichia coli strain FORC_082 plasmid pFORC82_2	Escherichia coli strain FORC_082
1566441590	CP026644.1	Escherichia coli strain FORC_082 plasmid pFORC82_3	Escherichia coli strain FORC_082
1633242730	CP039754.1	Escherichia coli strain NRRL B-1109 plasmid unnamed	Escherichia coli strain NRRL B-1109
1695099005	CP035705.1	Escherichia coli O157:H7 strain COPRO21317 plasmid p.O157	Escherichia coli O157:H7 strain COPRO21317
1723314444	CP042607.1	Escherichia coli strain NCYU-29-19 plasmid pNCYU-29-19-1_MCR1	Escherichia coli strain NCYU-29-19
1723314471	CP042608.1	Escherichia coli strain NCYU-29-19 plasmid pNCYU-29-19-2_MCR3	Escherichia coli strain NCYU-29-19
1723314489	CP042609.1	Escherichia coli strain NCYU-29-19 plasmid pNCYU-29-19-3	Escherichia coli strain NCYU-29-19
1723314497	CP042610.1	Escherichia coli strain NCYU-29-19 plasmid pNCYU-29-19-4	Escherichia coli strain NCYU-29-19
1723314501	CP042611.1	Escherichia coli strain NCYU-29-19 plasmid pNCYU-29-19-5	Escherichia coli strain NCYU-29-19
1723314505	CP042612.1	Escherichia coli strain NCYU-29-19 plasmid pNCYU-29-19-6	Escherichia coli strain NCYU-29-19
1723314508	CP042613.1	Escherichia coli strain NCYU-29-19 plasmid pNCYU-29-19-7	Escherichia coli strain NCYU-29-19
1723314512	CP042614.1	Escherichia coli strain NCYU-29-19 plasmid pNCYU-29-19-8	Escherichia coli strain NCYU-29-19
1723317244	CP042600.1	Escherichia coli strain NCYU-29-69 plasmid pNCYU-29-69-1	Escherichia coli strain NCYU-29-69
1723317395	CP042601.1	Escherichia coli strain NCYU-29-69 plasmid pNCYU-29-69-2	Escherichia coli strain NCYU-29-69
1723317465	CP042602.1	Escherichia coli strain NCYU-29-69 plasmid pNCYU-29-69-3_MCR3	Escherichia coli strain NCYU-29-69
1723317496	CP042603.1	Escherichia coli strain NCYU-29-69 plasmid pNCYU-29-69-4	Escherichia coli strain NCYU-29-69
1723317502	CP042604.1	Escherichia coli strain NCYU-29-69 plasmid pNCYU-29-69-5	Escherichia coli strain NCYU-29-69
1723317506	CP042605.1	Escherichia coli strain NCYU-29-69 plasmid pNCYU-29-69-6	Escherichia coli strain NCYU-29-69
1723319826	CP042639.1	Escherichia coli strain NCYU-24-74 plasmid pNCYU-24-74-1	Escherichia coli strain NCYU-24-74
1723319986	CP042640.1	Escherichia coli strain NCYU-24-74 plasmid pNCYU-24-74-2	Escherichia coli strain NCYU-24-74
1723320043	CP042641.1	Escherichia coli strain NCYU-24-74 plasmid pNCYU-24-74-3	Escherichia coli strain NCYU-24-74
1723320094	CP042642.1	Escherichia coli strain NCYU-24-74 plasmid pNCYU-24-74-4_MCR3	Escherichia coli strain NCYU-24-74
1723320138	CP042643.1	Escherichia coli strain NCYU-24-74 plasmid pNCYU-24-74-5	Escherichia coli strain NCYU-24-74
1723320166	CP042644.1	Escherichia coli strain NCYU-24-74 plasmid pNCYU-24-74-6_MCR1	Escherichia coli strain NCYU-24-74
1723323451	CP042628.1	Escherichia coli strain NCYU-25-82 plasmid pNCYU-25-82-1_MCR3	Escherichia coli strain NCYU-25-82
1723323593	CP042629.1	Escherichia coli strain NCYU-25-82 plasmid pNCYU-25-82-2	Escherichia coli strain NCYU-25-82
1723323730	CP042630.1	Escherichia coli strain NCYU-25-82 plasmid pNCYU-25-82-3	Escherichia coli strain NCYU-25-82
1723323845	CP042631.1	Escherichia coli strain NCYU-25-82 plasmid pNCYU-25-82-4	Escherichia coli strain NCYU-25-82
1723323949	CP042632.1	Escherichia coli strain NCYU-25-82 plasmid pNCYU-25-82-5	Escherichia coli strain NCYU-25-82
1723324013	CP042633.1	Escherichia coli strain NCYU-25-82 plasmid pNCYU-25-82-6	Escherichia coli strain NCYU-25-82
1723324078	CP042634.1	Escherichia coli strain NCYU-25-82 plasmid pNCYU-25-82-7	Escherichia coli strain NCYU-25-82
1723324099	CP042635.1	Escherichia coli strain NCYU-25-82 plasmid pNCYU-25-82-8	Escherichia coli strain NCYU-25-82
1723324101	CP042636.1	Escherichia coli strain NCYU-25-82 plasmid pNCYU-25-82-9	Escherichia coli strain NCYU-25-82
1723324103	CP042637.1	Escherichia coli strain NCYU-25-82 plasmid pNCYU-25-82-10	Escherichia coli strain NCYU-25-82
1723327138	CP042646.1	Escherichia coli strain NCYU-21-79 plasmid pNCYU-21-79-1	Escherichia coli strain NCYU-21-79
1723327247	CP042647.1	Escherichia coli strain NCYU-21-79 plasmid pNCYU-21-79-2_MCR1	Escherichia coli strain NCYU-21-79
1723327269	CP042648.1	Escherichia coli strain NCYU-21-79 plasmid pNCYU-21-79-3	Escherichia coli strain NCYU-21-79
1723327274	CP042649.1	Escherichia coli strain NCYU-21-79 plasmid pNCYU-21-79-4	Escherichia coli strain NCYU-21-79
1723330328	CP042616.1	Escherichia coli strain NCYU-26-73 plasmid pNCYU-26-73-1	Escherichia coli strain NCYU-26-73
1723330502	CP042617.1	Escherichia coli strain NCYU-26-73 plasmid pNCYU-26-73-2	Escherichia coli strain NCYU-26-73
1723330606	CP042618.1	Escherichia coli strain NCYU-26-73 plasmid pNCYU-26-73-3_MCR3	Escherichia coli strain NCYU-26-73
1723330705	CP042619.1	Escherichia coli strain NCYU-26-73 plasmid pNCYU-26-73-4	Escherichia coli strain NCYU-26-73
1723330788	CP042620.1	Escherichia coli strain NCYU-26-73 plasmid pNCYU-26-73-5	Escherichia coli strain NCYU-26-73
1723330869	CP042621.1	Escherichia coli strain NCYU-26-73 plasmid pNCYU-26-73-6	Escherichia coli strain NCYU-26-73
1723330930	CP042622.1	Escherichia coli strain NCYU-26-73 plasmid pNCYU-26-73-7	Escherichia coli strain NCYU-26-73
1723330967	CP042623.1	Escherichia coli strain NCYU-26-73 plasmid pNCYU-26-73-8	Escherichia coli strain NCYU-26-73
1723330975	CP042624.1	Escherichia coli strain NCYU-26-73 plasmid pNCYU-26-73-9	Escherichia coli strain NCYU-26-73
1723330979	CP042625.1	Escherichia coli strain NCYU-26-73 plasmid pNCYU-26-73-10	Escherichia coli strain NCYU-26-73
1723330983	CP042626.1	Escherichia coli strain NCYU-26-73 plasmid pNCYU-26-73-11	Escherichia coli strain NCYU-26-73
1724048519	NZ_AP019762.1	Escherichia coli O111:H- strain 110512 plasmid pO111-110512_1	Escherichia coli O111:H- strain 110512
1724048547	NZ_AP019763.1	Escherichia coli O111:H- strain 110512 plasmid pO111-110512_2	Escherichia coli O111:H- strain 110512
1724048560	NZ_AP019764.1	Escherichia coli O111:H- strain 110512 plasmid pO111-110512_3	Escherichia coli O111:H- strain 110512
1724048568	NZ_AP019765.1	Escherichia coli O111:H- strain 110512 plasmid pO111-110512_4	Escherichia coli O111:H- strain 110512
1724048573	NZ_AP019766.1	Escherichia coli O111:H- strain 110512 plasmid pO111-110512_5	Escherichia coli O111:H- strain 110512
1724048578	NZ_AP019767.1	Escherichia coli O111:H- strain 110512 plasmid pO111-110512_6	Escherichia coli O111:H- strain 110512
1724048583	NZ_AP019768.1	Escherichia coli O111:H- strain 110512 plasmid pO111-110512_7	Escherichia coli O111:H- strain 110512
1736666093	NZ_AP018147.1	Escherichia coli strain M217 isolate M217 plasmid pM217_FII	Escherichia coli strain M217
1736666095	NZ_AP019190.1	Escherichia coli strain M217 plasmid pM217_I1	Escherichia coli strain M217
1767732466	NZ_AP019676.1	Escherichia coli strain GSH8M-2 plasmid pGSH8M-2-1	Escherichia coli strain GSH8M-2
1767732496	NZ_AP019677.1	Escherichia coli strain GSH8M-2 plasmid pGSH8M-2-2	Escherichia coli strain GSH8M-2
1767732513	NZ_AP019678.1	Escherichia coli strain GSH8M-2 plasmid pGSH8M-2-3	Escherichia coli strain GSH8M-2
1767732528	NZ_AP019679.1	Escherichia coli strain GSH8M-2 plasmid pGSH8M-2-4	Escherichia coli strain GSH8M-2
1767732539	NZ_AP019680.1	Escherichia coli strain GSH8M-2 plasmid pGSH8M-2-5	Escherichia coli strain GSH8M-2
1767732542	NZ_AP019681.1	Escherichia coli strain GSH8M-2 plasmid pGSH8M-2-6	Escherichia coli strain GSH8M-2
1774718853	NZ_AP019857.1	Escherichia coli O8:H8 strain 16F5M1D1 plasmid p16F5M1D101	Escherichia coli O8:H8 strain 16F5M1D1
1774718854	NZ_AP019858.1	Escherichia coli O8:H8 strain 16F5M1D1 plasmid p16F5M1D102	Escherichia coli O8:H8 strain 16F5M1D1
1774718855	NZ_AP019859.1	Escherichia coli O8:H8 strain 16F5M1D1 plasmid p16F5M1D103	Escherichia coli O8:H8 strain 16F5M1D1
1785210040	CP044292.1	Escherichia coli strain P43A plasmid pP43A-1	Escherichia coli strain P43A
1785218210	CP044347.1	Escherichia coli strain P225M plasmid pP225M-CTX-M-55	Escherichia coli strain P225M
1785218318	CP044348.1	Escherichia coli strain P225M plasmid pP225M-2	Escherichia coli strain P225M
1785222302	CP044299.1	Escherichia coli strain P59A plasmid pP59A-CTX-M-55	Escherichia coli strain P59A
1785222535	CP044300.1	Escherichia coli strain P59A plasmid pP59A-2	Escherichia coli strain P59A
1785222655	CP044301.1	Escherichia coli strain P59A plasmid pP59A-3	Escherichia coli strain P59A
1785222723	CP044302.1	Escherichia coli strain P59A plasmid pP59A-4	Escherichia coli strain P59A
1785222748	CP044303.1	Escherichia coli strain P59A plasmid pP59A-5	Escherichia coli strain P59A
1785222755	CP044304.1	Escherichia coli strain P59A plasmid pP59A-6	Escherichia coli strain P59A
1785226690	CP044306.1	Escherichia coli strain C27A plasmid pC27A-CTX-M-55	Escherichia coli strain C27A
1785226908	CP044307.1	Escherichia coli strain C27A plasmid pC27A-2	Escherichia coli strain C27A
1785226950	CP044308.1	Escherichia coli strain C27A plasmid pC27A-3	Escherichia coli strain C27A
1785226986	CP044309.1	Escherichia coli strain C27A plasmid pC27A-4	Escherichia coli strain C27A
1796941828	CP041748.1	Escherichia coli strain NCCP 15739 plasmid unnamed	Escherichia coli strain NCCP 15739
1817332209	CP034254.1	Escherichia coli strain IVRI Kol CP4 plasmid p1ESCUMpO83_CORR	Escherichia coli strain IVRI Kol CP4
1817332317	CP034255.1	Escherichia coli strain IVRI Kol CP4 plasmid pESBL-EA11	Escherichia coli strain IVRI Kol CP4
1817332383	CP034256.1	Escherichia coli strain IVRI Kol CP4 plasmid pESBL-EA11pO83_CORR	Escherichia coli strain IVRI Kol CP4
1821460777	CP049944.1	Escherichia coli strain pV01-18-E02-25-25 plasmid pK18EC025	Escherichia coli strain pV01-18-E02-25-25
1835978229	CP051750.1	Escherichia coli strain SCU-486 plasmid pSCU-486-1	Escherichia coli strain SCU-486
1836048958	CP051693.1	Escherichia coli strain SCU-318 plasmid pSCU-318-1	Escherichia coli strain SCU-318
1845295605	CP053596.1	Escherichia coli strain T7Express_LysYIq plasmid pMiniF_lysY/lacIq	Escherichia coli strain T7Express_LysYIq
1847235234	NZ_AP021897.1	Escherichia coli strain 2018-02-2CC plasmid p2018_02_02CC	Escherichia coli strain 2018-02-2CC
1847497669	NZ_AP022651.1	Escherichia coli strain 09-02E plasmid p1-09-02E	Escherichia coli strain 09-02E
1847497670	NZ_AP022652.1	Escherichia coli strain 09-02E plasmid p2-09-02E	Escherichia coli strain 09-02E
1847497671	NZ_AP022653.1	Escherichia coli strain 09-02E plasmid p3-09-02E	Escherichia coli strain 09-02E
1847497672	NZ_AP022654.1	Escherichia coli strain 09-02E plasmid p4-09-02E	Escherichia coli strain 09-02E
1847497673	NZ_AP022655.1	Escherichia coli strain 09-02E plasmid p5-09-02E	Escherichia coli strain 09-02E
1847497674	NZ_AP022656.1	Escherichia coli strain 09-02E plasmid p6-09-02E	Escherichia coli strain 09-02E
1847497675	NZ_AP022657.1	Escherichia coli strain 09-02E plasmid p7-09-02E	Escherichia coli strain 09-02E
1847497676	NZ_AP022658.1	Escherichia coli strain 09-02E plasmid p8-09-02E	Escherichia coli strain 09-02E
1847497677	NZ_AP022659.1	Escherichia coli strain 09-02E plasmid p9-09-02E	Escherichia coli strain 09-02E
1851781262	CP054315.1	Escherichia coli strain SCU-483 plasmid pSCU-483-2	Escherichia coli strain SCU-483
1851781317	CP054316.1	Escherichia coli strain SCU-483 plasmid pSCU-483-1	Escherichia coli strain SCU-483
1851785389	CP054318.1	Escherichia coli strain SCU-479 plasmid pSCU-479-1	Escherichia coli strain SCU-479
1851789056	CP054320.1	Escherichia coli strain SCU-390 plasmid pSCU-390-2	Escherichia coli strain SCU-390
1851789094	CP054321.1	Escherichia coli strain SCU-390 plasmid pSCU-390-1	Escherichia coli strain SCU-390
1851789159	CP054322.1	Escherichia coli strain SCU-390 plasmid pSCU-390-3	Escherichia coli strain SCU-390
1851789165	CP054323.1	Escherichia coli strain SCU-390 plasmid pSCU-390-4	Escherichia coli strain SCU-390
1851789169	CP054324.1	Escherichia coli strain SCU-390 plasmid pSCU-390-5	Escherichia coli strain SCU-390
1851792790	CP054326.1	Escherichia coli strain SCU-147 plasmid pSCU-147-1	Escherichia coli strain SCU-147
1851792866	CP054327.1	Escherichia coli strain SCU-147 plasmid pSCU-147-2	Escherichia coli strain SCU-147
1851796349	CP054329.1	Escherichia coli strain SCU-121 plasmid pSCU-121-1	Escherichia coli strain SCU-121
1851796417	CP054330.1	Escherichia coli strain SCU-121 plasmid pSCU-121-2	Escherichia coli strain SCU-121
1851796429	CP054331.1	Escherichia coli strain SCU-121 plasmid pSCU-121-3	Escherichia coli strain SCU-121
1851796436	CP054332.1	Escherichia coli strain SCU-121 plasmid pSCU-121-4	Escherichia coli strain SCU-121
1851796440	CP054333.1	Escherichia coli strain SCU-121 plasmid pSCU-121-5	Escherichia coli strain SCU-121
1851796445	CP054334.1	Escherichia coli strain SCU-121 plasmid pSCU-121-6	Escherichia coli strain SCU-121
1851800428	CP054336.1	Escherichia coli strain SCU-120 plasmid pSCU-120-1	Escherichia coli strain SCU-120
1851800552	CP054337.1	Escherichia coli strain SCU-120 plasmid pSCU-120-2	Escherichia coli strain SCU-120
1851800638	CP054338.1	Escherichia coli strain SCU-120 plasmid pSCU-120-3	Escherichia coli strain SCU-120
1851800648	CP054339.1	Escherichia coli strain SCU-120 plasmid pSCU-120-4	Escherichia coli strain SCU-120
1851800654	CP054340.1	Escherichia coli strain SCU-120 plasmid pSCU-120-5	Escherichia coli strain SCU-120
1851800661	CP054341.1	Escherichia coli strain SCU-120 plasmid pSCU-120-6	Escherichia coli strain SCU-120
1851800664	CP054342.1	Escherichia coli strain SCU-120 plasmid pSCU-120-7	Escherichia coli strain SCU-120
1853362645	NZ_AP023198.1	Escherichia coli strain TUM18780 plasmid pMTY18780-1_lncHI2	Escherichia coli strain TUM18780
1853362646	NZ_AP023199.1	Escherichia coli strain TUM18780 plasmid pMTY18780-2	Escherichia coli strain TUM18780
1853362647	NZ_AP023200.1	Escherichia coli strain TUM18780 plasmid pMTY18780-3	Escherichia coli strain TUM18780
1853362648	NZ_AP023201.1	Escherichia coli strain TUM18780 plasmid pMTY18780-4	Escherichia coli strain TUM18780
1853362649	NZ_AP023202.1	Escherichia coli strain TUM18780 plasmid pMTY18780-5_IncX3	Escherichia coli strain TUM18780
1853362650	NZ_AP023203.1	Escherichia coli strain TUM18780 plasmid pMTY18780-6	Escherichia coli strain TUM18780
1853362651	NZ_AP023204.1	Escherichia coli strain TUM18780 plasmid pMTY18780-7	Escherichia coli strain TUM18780
1853362693	NZ_AP023206.1	Escherichia coli strain TUM18781 plasmid pMTY18781-1_lncX3	Escherichia coli strain TUM18781
1853362694	NZ_AP023207.1	Escherichia coli strain TUM18781 plasmid pMTY18781-2	Escherichia coli strain TUM18781
1853362695	NZ_AP023208.1	Escherichia coli strain TUM18781 plasmid pMTY18781-3	Escherichia coli strain TUM18781
1853362696	NZ_AP023209.1	Escherichia coli strain TUM18781 plasmid pMTY18781-4	Escherichia coli strain TUM18781
1853362697	NZ_AP023210.1	Escherichia coli strain TUM18781 plasmid pMTY18781-5	Escherichia coli strain TUM18781
1853362698	NZ_AP023211.1	Escherichia coli strain TUM18781 plasmid pMTY18781-6	Escherichia coli strain TUM18781
1853376287	NZ_AP023191.1	Escherichia coli strain TUM18530 plasmid pMTY18530-1_lncHI2	Escherichia coli strain TUM18530
1853376288	NZ_AP023192.1	Escherichia coli strain TUM18530 plasmid pMTY18530-2	Escherichia coli strain TUM18530
1853376289	NZ_AP023193.1	Escherichia coli strain TUM18530 plasmid pMTY18530-3_incFll	Escherichia coli strain TUM18530
1853376290	NZ_AP023194.1	Escherichia coli strain TUM18530 plasmid pMTY18530-4_lncX3	Escherichia coli strain TUM18530
1853376291	NZ_AP023195.1	Escherichia coli strain TUM18530 plasmid pMTY18530-5	Escherichia coli strain TUM18530
1853376292	NZ_AP023196.1	Escherichia coli strain TUM18530 plasmid pMTY18530-6	Escherichia coli strain TUM18530
1853432301	CP054450.1	Escherichia coli strain SCU-488 plasmid pSCU-488-1	Escherichia coli strain SCU-488
1853432426	CP054451.1	Escherichia coli strain SCU-488 plasmid pSCU-488-2	Escherichia coli strain SCU-488
1853432434	CP054452.1	Escherichia coli strain SCU-488 plasmid pSCU-488-3	Escherichia coli strain SCU-488
1853432439	CP054453.1	Escherichia coli strain SCU-488 plasmid pSCU-488-4	Escherichia coli strain SCU-488
1853440980	CP054455.1	Escherichia coli strain SCU-487 plasmid pSCU-487-1	Escherichia coli strain SCU-487
1853441085	CP054456.1	Escherichia coli strain SCU-487 plasmid pSCU-487-2	Escherichia coli strain SCU-487
1853444656	CP054458.1	Escherichia coli strain SCU-103 plasmid pSCU-103-1	Escherichia coli strain SCU-103
1853444799	CP054459.1	Escherichia coli strain SCU-103 plasmid pSCU-103-2	Escherichia coli strain SCU-103
1853444891	CP054460.1	Escherichia coli strain SCU-103 plasmid pSCU-103-3	Escherichia coli strain SCU-103
1853444928	CP054461.1	Escherichia coli strain SCU-103 plasmid pSCU-103-4	Escherichia coli strain SCU-103
1853444939	CP054462.1	Escherichia coli strain SCU-103 plasmid pSCU-103-5	Escherichia coli strain SCU-103
1853444943	CP054463.1	Escherichia coli strain SCU-103 plasmid pSCU-103-6	Escherichia coli strain SCU-103
1853444946	CP054464.1	Escherichia coli strain SCU-103 plasmid pSCU-103-7	Escherichia coli strain SCU-103
1859033448	CP054829.1	Escherichia coli strain SCU-397 plasmid pSCU-397-1	Escherichia coli strain SCU-397
1859033562	CP054830.1	Escherichia coli strain SCU-397 plasmid pSCU-397-2	Escherichia coli strain SCU-397
1862746456	NZ_AP023225.1	Escherichia coli strain YJ1 plasmid pYJ1-NDM5	Escherichia coli strain YJ1
1862746967	NZ_AP023238.1	Escherichia coli strain F070 plasmid pF070-NDM5	Escherichia coli strain F070
1862749817	NZ_AP023227.1	Escherichia coli strain YJ3 plasmid pYJ3-NDM1	Escherichia coli strain YJ3
1862749818	NZ_AP023228.1	Escherichia coli strain YJ3 plasmid pYJ3-a	Escherichia coli strain YJ3
1862749819	NZ_AP023229.1	Escherichia coli strain YJ3 plasmid pYJ3-b	Escherichia coli strain YJ3
1862751269	NZ_AP023236.1	Escherichia coli strain YJ6 plasmid pYJ6-NDM5	Escherichia coli strain YJ6
1877760728	CP058914.1	Escherichia coli strain HH12 plasmid pHH12_P1	Escherichia coli strain HH12
1877760840	CP058915.1	Escherichia coli strain HH12 plasmid pHH12_P2	Escherichia coli strain HH12
1877760913	CP058916.1	Escherichia coli strain HH12 plasmid pHH12_P3	Escherichia coli strain HH12
1888572806	CP059905.1	Escherichia coli strain 276.2 plasmid p1	Escherichia coli strain 276.2
1888572946	CP059906.1	Escherichia coli strain 276.2 plasmid p2	Escherichia coli strain 276.2
1888608794	CP059923.1	Escherichia coli strain 56.2 plasmid p1	Escherichia coli strain 56.2
1888608915	CP059924.1	Escherichia coli strain 56.2 plasmid p2	Escherichia coli strain 56.2
1888617847	CP059926.1	Escherichia coli strain 34.1 plasmid p1	Escherichia coli strain 34.1
1888617960	CP059927.1	Escherichia coli strain 34.1 plasmid p2	Escherichia coli strain 34.1
1888618075	CP059928.1	Escherichia coli strain 34.1 plasmid p3	Escherichia coli strain 34.1
1888622401	CP059930.1	Escherichia coli strain 162.2 plasmid p1	Escherichia coli strain 162.2
1888631253	CP059989.1	Escherichia coli strain 154AHL.1 plasmid p1	Escherichia coli strain 154AHL.1
1888631375	CP059990.1	Escherichia coli strain 154AHL.1 plasmid p2	Escherichia coli strain 154AHL.1
1888635755	CP059945.1	Escherichia coli strain 101.3 plasmid p1	Escherichia coli strain 101.3
1888635849	CP059946.1	Escherichia coli strain 101.3 plasmid p2	Escherichia coli strain 101.3
1890009109	NZ_AP021915.1	Escherichia coli strain WP2-W18-CRE-03 plasmid pWP2-W18-CRE-03_1	Escherichia coli strain WP2-W18-CRE-03
1890009134	NZ_AP021916.1	Escherichia coli strain WP2-W18-CRE-03 plasmid pWP2-W18-CRE-03_2	Escherichia coli strain WP2-W18-CRE-03
1890012548	NZ_AP021999.1	Escherichia coli strain WP3-W18-ESBL-07 plasmid pWP3-W18-ESBL-07_1	Escherichia coli strain WP3-W18-ESBL-07
1890012549	NZ_AP022000.1	Escherichia coli strain WP3-W18-ESBL-07 plasmid pWP3-W18-ESBL-07_2	Escherichia coli strain WP3-W18-ESBL-07
1890012550	NZ_AP022001.1	Escherichia coli strain WP3-W18-ESBL-07 plasmid pWP3-W18-ESBL-07_3	Escherichia coli strain WP3-W18-ESBL-07
1890012551	NZ_AP022002.1	Escherichia coli strain WP3-W18-ESBL-07 plasmid pWP3-W18-ESBL-07_4	Escherichia coli strain WP3-W18-ESBL-07
1890012756	NZ_AP022106.1	Escherichia coli strain WP5-S17-ESBL-10 plasmid pWP5-S17-ESBL-10_1	Escherichia coli strain WP5-S17-ESBL-10
1890016481	NZ_AP022037.1	Escherichia coli strain WP3-S18-ESBL-09 plasmid pWP3-S18-ESBL-09_1	Escherichia coli strain WP3-S18-ESBL-09
1890016868	NZ_AP021945.1	Escherichia coli strain WP2-S18-ESBL-07 plasmid pWP2-S18-ESBL-07_1	Escherichia coli strain WP2-S18-ESBL-07
1890017038	NZ_AP021947.1	Escherichia coli strain WP2-S18-ESBL-08 plasmid pWP2-S18-ESBL-08_1	Escherichia coli strain WP2-S18-ESBL-08
1890017039	NZ_AP021948.1	Escherichia coli strain WP2-S18-ESBL-08 plasmid pWP2-S18-ESBL-08_2	Escherichia coli strain WP2-S18-ESBL-08
1890017040	NZ_AP021949.1	Escherichia coli strain WP2-S18-ESBL-08 plasmid pWP2-S18-ESBL-08_3	Escherichia coli strain WP2-S18-ESBL-08
1890017115	NZ_AP021964.1	Escherichia coli strain WP3-W18-CRE-03 plasmid pWP3-W18-CRE-03_1	Escherichia coli strain WP3-W18-CRE-03
1890017116	NZ_AP021965.1	Escherichia coli strain WP3-W18-CRE-03 plasmid pWP3-W18-CRE-03_2	Escherichia coli strain WP3-W18-CRE-03
1890017117	NZ_AP021966.1	Escherichia coli strain WP3-W18-CRE-03 plasmid pWP3-W18-CRE-03_3	Escherichia coli strain WP3-W18-CRE-03
1890017118	NZ_AP021967.1	Escherichia coli strain WP3-W18-CRE-03 plasmid pWP3-W18-CRE-03_4	Escherichia coli strain WP3-W18-CRE-03
1890017119	NZ_AP021968.1	Escherichia coli strain WP3-W18-CRE-03 plasmid pWP3-W18-CRE-03_5	Escherichia coli strain WP3-W18-CRE-03
1890017142	NZ_AP022121.1	Escherichia coli strain WP5-W18-ESBL-11 plasmid pWP5-W18-ESBL-11_1	Escherichia coli strain WP5-W18-ESBL-11
1890017143	NZ_AP022122.1	Escherichia coli strain WP5-W18-ESBL-11 plasmid pWP5-W18-ESBL-11_2	Escherichia coli strain WP5-W18-ESBL-11
1890017144	NZ_AP022123.1	Escherichia coli strain WP5-W18-ESBL-11 plasmid pWP5-W18-ESBL-11_3	Escherichia coli strain WP5-W18-ESBL-11
1890017145	NZ_AP022124.1	Escherichia coli strain WP5-W18-ESBL-11 plasmid pWP5-W18-ESBL-11_4	Escherichia coli strain WP5-W18-ESBL-11
1890017146	NZ_AP022125.1	Escherichia coli strain WP5-W18-ESBL-11 plasmid pWP5-W18-ESBL-11_5	Escherichia coli strain WP5-W18-ESBL-11
1890017229	NZ_AP022065.1	Escherichia coli strain WP4-W18-ESBL-08 plasmid pWP4-W18-ESBL-08_1	Escherichia coli strain WP4-W18-ESBL-08
1890017230	NZ_AP022066.1	Escherichia coli strain WP4-W18-ESBL-08 plasmid pWP4-W18-ESBL-08_2	Escherichia coli strain WP4-W18-ESBL-08
1890017231	NZ_AP022067.1	Escherichia coli strain WP4-W18-ESBL-08 plasmid pWP4-W18-ESBL-08_3	Escherichia coli strain WP4-W18-ESBL-08
1890017232	NZ_AP022068.1	Escherichia coli strain WP4-W18-ESBL-08 plasmid pWP4-W18-ESBL-08_4	Escherichia coli strain WP4-W18-ESBL-08
1890017369	NZ_AP022160.1	Escherichia coli strain WP5-S18-ESBL-07 plasmid pWP5-S18-ESBL-07_1	Escherichia coli strain WP5-S18-ESBL-07
1890017427	NZ_AP022096.1	Escherichia coli strain WP4-S18-ESBL-08 plasmid pWP4-S18-ESBL-08_1	Escherichia coli strain WP4-S18-ESBL-08
1890017428	NZ_AP022097.1	Escherichia coli strain WP4-S18-ESBL-08 plasmid pWP4-S18-ESBL-08_2	Escherichia coli strain WP4-S18-ESBL-08
1890017458	NZ_AP021934.1	Escherichia coli strain WP2-W18-ESBL-08 plasmid pWP2-W18-ESBL-08_1	Escherichia coli strain WP2-W18-ESBL-08
1890017546	NZ_AP022178.1	Escherichia coli strain WP7-S17-ESBL-04 plasmid pWP7-S17-ESBL-04_1	Escherichia coli strain WP7-S17-ESBL-04
1890017547	NZ_AP022179.1	Escherichia coli strain WP7-S17-ESBL-04 plasmid pWP7-S17-ESBL-04_2	Escherichia coli strain WP7-S17-ESBL-04
1890017548	NZ_AP022180.1	Escherichia coli strain WP7-S17-ESBL-04 plasmid pWP7-S17-ESBL-04_3	Escherichia coli strain WP7-S17-ESBL-04
1890017549	NZ_AP022181.1	Escherichia coli strain WP7-S17-ESBL-04 plasmid pWP7-S17-ESBL-04_4	Escherichia coli strain WP7-S17-ESBL-04
1890017550	NZ_AP022182.1	Escherichia coli strain WP7-S17-ESBL-04 plasmid pWP7-S17-ESBL-04_5	Escherichia coli strain WP7-S17-ESBL-04
1890017564	NZ_AP022099.1	Escherichia coli strain WP4-S18-ESBL-09 plasmid pWP4-S18-ESBL-09_1	Escherichia coli strain WP4-S18-ESBL-09
1890017565	NZ_AP022100.1	Escherichia coli strain WP4-S18-ESBL-09 plasmid pWP4-S18-ESBL-09_2	Escherichia coli strain WP4-S18-ESBL-09
1890017566	NZ_AP022101.1	Escherichia coli strain WP4-S18-ESBL-09 plasmid pWP4-S18-ESBL-09_3	Escherichia coli strain WP4-S18-ESBL-09
1890017567	NZ_AP022102.1	Escherichia coli strain WP4-S18-ESBL-09 plasmid pWP4-S18-ESBL-09_4	Escherichia coli strain WP4-S18-ESBL-09
1890017568	NZ_AP022103.1	Escherichia coli strain WP4-S18-ESBL-09 plasmid pWP4-S18-ESBL-09_5	Escherichia coli strain WP4-S18-ESBL-09
1890017569	NZ_AP022104.1	Escherichia coli strain WP4-S18-ESBL-09 plasmid pWP4-S18-ESBL-09_6	Escherichia coli strain WP4-S18-ESBL-09
1890017613	NZ_AP022045.1	Escherichia coli strain WP4-S17-ESBL-03 plasmid pWP4-S17-ESBL-03_1	Escherichia coli strain WP4-S17-ESBL-03
1890017614	NZ_AP022046.1	Escherichia coli strain WP4-S17-ESBL-03 plasmid pWP4-S17-ESBL-03_2	Escherichia coli strain WP4-S17-ESBL-03
1890017615	NZ_AP022047.1	Escherichia coli strain WP4-S17-ESBL-03 plasmid pWP4-S17-ESBL-03_3	Escherichia coli strain WP4-S17-ESBL-03
1890017616	NZ_AP022048.1	Escherichia coli strain WP4-S17-ESBL-03 plasmid pWP4-S17-ESBL-03_4	Escherichia coli strain WP4-S17-ESBL-03
1890021542	NZ_AP022216.1	Escherichia coli strain WP8-S17-ESBL-05 plasmid pWP8-S17-ESBL-05_1	Escherichia coli strain WP8-S17-ESBL-05
1890021543	NZ_AP022217.1	Escherichia coli strain WP8-S17-ESBL-05 plasmid pWP8-S17-ESBL-05_2	Escherichia coli strain WP8-S17-ESBL-05
1890021544	NZ_AP022218.1	Escherichia coli strain WP8-S17-ESBL-05 plasmid pWP8-S17-ESBL-05_3	Escherichia coli strain WP8-S17-ESBL-05
1890021545	NZ_AP022219.1	Escherichia coli strain WP8-S17-ESBL-05 plasmid pWP8-S17-ESBL-05_4	Escherichia coli strain WP8-S17-ESBL-05
1890021546	NZ_AP022220.1	Escherichia coli strain WP8-S17-ESBL-05 plasmid pWP8-S17-ESBL-05_5	Escherichia coli strain WP8-S17-ESBL-05
1890027049	NZ_AP022004.1	Escherichia coli strain WP3-W18-ESBL-08 plasmid pWP3-W18-ESBL-08_1	Escherichia coli strain WP3-W18-ESBL-08
1890032959	NZ_AP022033.1	Escherichia coli strain WP3-S18-ESBL-08 plasmid pWP3-S18-ESBL-08_1	Escherichia coli strain WP3-S18-ESBL-08
1890032966	NZ_AP022034.1	Escherichia coli strain WP3-S18-ESBL-08 plasmid pWP3-S18-ESBL-08_2	Escherichia coli strain WP3-S18-ESBL-08
1890032969	NZ_AP022035.1	Escherichia coli strain WP3-S18-ESBL-08 plasmid pWP3-S18-ESBL-08_3	Escherichia coli strain WP3-S18-ESBL-08
1890037589	NZ_AP022174.1	Escherichia coli strain WP7-S17-ESBL-01 plasmid pWP7-S17-ESBL-01_1	Escherichia coli strain WP7-S17-ESBL-01
1890037607	NZ_AP022175.1	Escherichia coli strain WP7-S17-ESBL-01 plasmid pWP7-S17-ESBL-01_2	Escherichia coli strain WP7-S17-ESBL-01
1890037612	NZ_AP022176.1	Escherichia coli strain WP7-S17-ESBL-01 plasmid pWP7-S17-ESBL-01_3	Escherichia coli strain WP7-S17-ESBL-01
1890041798	NZ_AP022262.1	Escherichia coli strain WP8-S18-ESBL-07 plasmid pWP8-S18-ESBL-07_1	Escherichia coli strain WP8-S18-ESBL-07
1890041819	NZ_AP022263.1	Escherichia coli strain WP8-S18-ESBL-07 plasmid pWP8-S18-ESBL-07_2	Escherichia coli strain WP8-S18-ESBL-07
1890061139	NZ_AP022031.1	Escherichia coli strain WP3-S18-ESBL-07 plasmid pWP3-S18-ESBL-07_1	Escherichia coli strain WP3-S18-ESBL-07
1890062237	NZ_AP022050.1	Escherichia coli strain WP4-S17-ESBL-08 plasmid pWP4-S17-ESBL-08_1	Escherichia coli strain WP4-S17-ESBL-08
1890062238	NZ_AP022051.1	Escherichia coli strain WP4-S17-ESBL-08 plasmid pWP4-S17-ESBL-08_2	Escherichia coli strain WP4-S17-ESBL-08
1890062239	NZ_AP022052.1	Escherichia coli strain WP4-S17-ESBL-08 plasmid pWP4-S17-ESBL-08_3	Escherichia coli strain WP4-S17-ESBL-08
1890062240	NZ_AP022053.1	Escherichia coli strain WP4-S17-ESBL-08 plasmid pWP4-S17-ESBL-08_4	Escherichia coli strain WP4-S17-ESBL-08
1890062241	NZ_AP022054.1	Escherichia coli strain WP4-S17-ESBL-08 plasmid pWP4-S17-ESBL-08_5	Escherichia coli strain WP4-S17-ESBL-08
1890072269	NZ_AP022208.1	Escherichia coli strain WP7-S18-ESBL-09 plasmid pWP7-S18-ESBL-09_1	Escherichia coli strain WP7-S18-ESBL-09
1890072270	NZ_AP022209.1	Escherichia coli strain WP7-S18-ESBL-09 plasmid pWP7-S18-ESBL-09_2	Escherichia coli strain WP7-S18-ESBL-09
1890072271	NZ_AP022210.1	Escherichia coli strain WP7-S18-ESBL-09 plasmid pWP7-S18-ESBL-09_3	Escherichia coli strain WP7-S18-ESBL-09
1890072272	NZ_AP022211.1	Escherichia coli strain WP7-S18-ESBL-09 plasmid pWP7-S18-ESBL-09_4	Escherichia coli strain WP7-S18-ESBL-09
1890072273	NZ_AP022212.1	Escherichia coli strain WP7-S18-ESBL-09 plasmid pWP7-S18-ESBL-09_5	Escherichia coli strain WP7-S18-ESBL-09
1890072302	NZ_AP022246.1	Escherichia coli strain WP8-S18-CRE-02 plasmid pWP8-S18-CRE-02_1	Escherichia coli strain WP8-S18-CRE-02
1890072303	NZ_AP022247.1	Escherichia coli strain WP8-S18-CRE-02 plasmid pWP8-S18-CRE-02_2	Escherichia coli strain WP8-S18-CRE-02
1890072304	NZ_AP022248.1	Escherichia coli strain WP8-S18-CRE-02 plasmid pWP8-S18-CRE-02_3	Escherichia coli strain WP8-S18-CRE-02
1890072305	NZ_AP022249.1	Escherichia coli strain WP8-S18-CRE-02 plasmid pWP8-S18-CRE-02_4	Escherichia coli strain WP8-S18-CRE-02
1890072306	NZ_AP022250.1	Escherichia coli strain WP8-S18-CRE-02 plasmid pWP8-S18-CRE-02_5	Escherichia coli strain WP8-S18-CRE-02
1890072307	NZ_AP022251.1	Escherichia coli strain WP8-S18-CRE-02 plasmid pWP8-S18-CRE-02_6	Escherichia coli strain WP8-S18-CRE-02
1890077893	NZ_AP022070.1	Escherichia coli strain WP4-W18-ESBL-09 plasmid pWP4-W18-ESBL-09_1	Escherichia coli strain WP4-W18-ESBL-09
1890077894	NZ_AP022071.1	Escherichia coli strain WP4-W18-ESBL-09 plasmid pWP4-W18-ESBL-09_2	Escherichia coli strain WP4-W18-ESBL-09
1890077895	NZ_AP022072.1	Escherichia coli strain WP4-W18-ESBL-09 plasmid pWP4-W18-ESBL-09_3	Escherichia coli strain WP4-W18-ESBL-09
1890077896	NZ_AP022073.1	Escherichia coli strain WP4-W18-ESBL-09 plasmid pWP4-W18-ESBL-09_4	Escherichia coli strain WP4-W18-ESBL-09
1890077897	NZ_AP022074.1	Escherichia coli strain WP4-W18-ESBL-09 plasmid pWP4-W18-ESBL-09_5	Escherichia coli strain WP4-W18-ESBL-09
1890077898	NZ_AP022075.1	Escherichia coli strain WP4-W18-ESBL-09 plasmid pWP4-W18-ESBL-09_6	Escherichia coli strain WP4-W18-ESBL-09
1890077899	NZ_AP022076.1	Escherichia coli strain WP4-W18-ESBL-09 plasmid pWP4-W18-ESBL-09_7	Escherichia coli strain WP4-W18-ESBL-09
1890080243	NZ_AP022172.1	Escherichia coli strain WP5-S18-ESBL-09 plasmid pWP5-S18-ESBL-09_1	Escherichia coli strain WP5-S18-ESBL-09
1890080883	NZ_AP022088.1	Escherichia coli strain WP4-S18-ESBL-07 plasmid pWP4-S18-ESBL-07_1	Escherichia coli strain WP4-S18-ESBL-07
1890080907	NZ_AP022089.1	Escherichia coli strain WP4-S18-ESBL-07 plasmid pWP4-S18-ESBL-07_2	Escherichia coli strain WP4-S18-ESBL-07
1890080928	NZ_AP022090.1	Escherichia coli strain WP4-S18-ESBL-07 plasmid pWP4-S18-ESBL-07_3	Escherichia coli strain WP4-S18-ESBL-07
1890080943	NZ_AP022091.1	Escherichia coli strain WP4-S18-ESBL-07 plasmid pWP4-S18-ESBL-07_4	Escherichia coli strain WP4-S18-ESBL-07
1890080956	NZ_AP022092.1	Escherichia coli strain WP4-S18-ESBL-07 plasmid pWP4-S18-ESBL-07_5	Escherichia coli strain WP4-S18-ESBL-07
1890080959	NZ_AP022093.1	Escherichia coli strain WP4-S18-ESBL-07 plasmid pWP4-S18-ESBL-07_6	Escherichia coli strain WP4-S18-ESBL-07
1890084227	NZ_AP022296.1	Escherichia coli strain BEC1-S17-ESBL-07 plasmid pBEC1-S17-ESBL-07_1	Escherichia coli strain BEC1-S17-ESBL-07
1890084228	NZ_AP022297.1	Escherichia coli strain BEC1-S17-ESBL-07 plasmid pBEC1-S17-ESBL-07_2	Escherichia coli strain BEC1-S17-ESBL-07
1890084851	NZ_AP022223.1	Escherichia coli strain WP8-S17-ESBL-12 plasmid pWP8-S17-ESBL-12_1	Escherichia coli strain WP8-S17-ESBL-12
1890084852	NZ_AP022224.1	Escherichia coli strain WP8-S17-ESBL-12 plasmid pWP8-S17-ESBL-12_2	Escherichia coli strain WP8-S17-ESBL-12
1890084853	NZ_AP022225.1	Escherichia coli strain WP8-S17-ESBL-12 plasmid pWP8-S17-ESBL-12_3	Escherichia coli strain WP8-S17-ESBL-12
1890084854	NZ_AP022226.1	Escherichia coli strain WP8-S17-ESBL-12 plasmid pWP8-S17-ESBL-12_4	Escherichia coli strain WP8-S17-ESBL-12
1890084944	NZ_AP022299.1	Escherichia coli strain BEC1-S17-ESBL-09 plasmid pBEC1-S17-ESBL-09_1	Escherichia coli strain BEC1-S17-ESBL-09
1890084945	NZ_AP022300.1	Escherichia coli strain BEC1-S17-ESBL-09 plasmid pBEC1-S17-ESBL-09_2	Escherichia coli strain BEC1-S17-ESBL-09
1890084947	NZ_AP022301.1	Escherichia coli strain BEC1-S17-ESBL-09 plasmid pBEC1-S17-ESBL-09_3	Escherichia coli strain BEC1-S17-ESBL-09
1890088529	NZ_AP022288.1	Escherichia coli strain WP9-S17-ESBL-11 plasmid pWP9-S17-ESBL-11_1	Escherichia coli strain WP9-S17-ESBL-11
1890088543	NZ_AP022289.1	Escherichia coli strain WP9-S17-ESBL-11 plasmid pWP9-S17-ESBL-11_2	Escherichia coli strain WP9-S17-ESBL-11
1909140457	NZ_AP023428.1	Escherichia coli strain HUE1 plasmid pHFQ1	Escherichia coli strain HUE1
1909140476	NZ_AP023429.1	Escherichia coli strain HUE1 plasmid pHFQ2	Escherichia coli strain HUE1
1909140489	NZ_AP023430.1	Escherichia coli strain HUE1 plasmid pHFQ3	Escherichia coli strain HUE1
1909140497	NZ_AP023431.1	Escherichia coli strain HUE1 plasmid pHFQ4	Escherichia coli strain HUE1
1909140500	NZ_AP023432.1	Escherichia coli strain HUE1 plasmid pHFQ5	Escherichia coli strain HUE1
1911104482	NZ_AP022162.1	Escherichia coli strain WP5-S18-ESBL-08 plasmid pWP5-S18-ESBL-08_1	Escherichia coli strain WP5-S18-ESBL-08
1911104483	NZ_AP022163.1	Escherichia coli strain WP5-S18-ESBL-08 plasmid pWP5-S18-ESBL-08_2	Escherichia coli strain WP5-S18-ESBL-08
1911104484	NZ_AP022164.1	Escherichia coli strain WP5-S18-ESBL-08 plasmid pWP5-S18-ESBL-08_3	Escherichia coli strain WP5-S18-ESBL-08
1911104485	NZ_AP022165.1	Escherichia coli strain WP5-S18-ESBL-08 plasmid pWP5-S18-ESBL-08_4	Escherichia coli strain WP5-S18-ESBL-08
1911104486	NZ_AP022166.1	Escherichia coli strain WP5-S18-ESBL-08 plasmid pWP5-S18-ESBL-08_5	Escherichia coli strain WP5-S18-ESBL-08
1911104487	NZ_AP022167.1	Escherichia coli strain WP5-S18-ESBL-08 plasmid pWP5-S18-ESBL-08_6	Escherichia coli strain WP5-S18-ESBL-08
1911104488	NZ_AP022168.1	Escherichia coli strain WP5-S18-ESBL-08 plasmid pWP5-S18-ESBL-08_7	Escherichia coli strain WP5-S18-ESBL-08
1911104489	NZ_AP022169.1	Escherichia coli strain WP5-S18-ESBL-08 plasmid pWP5-S18-ESBL-08_8	Escherichia coli strain WP5-S18-ESBL-08
1911104490	NZ_AP022170.1	Escherichia coli strain WP5-S18-ESBL-08 plasmid pWP5-S18-ESBL-08_9	Escherichia coli strain WP5-S18-ESBL-08
1927384370	LR890263.1	Escherichia coli isolate MSB1_3C-sc-2280310 genome assembly, plasmid: 2	Escherichia coli isolate MSB1_3C-sc-2280310 genome assembly,
1927384371	LR890264.1	Escherichia coli isolate MSB1_3C-sc-2280310 genome assembly, plasmid: 3	Escherichia coli isolate MSB1_3C-sc-2280310 genome assembly,
1927384372	LR890265.1	Escherichia coli isolate MSB1_3C-sc-2280310 genome assembly, plasmid: 4	Escherichia coli isolate MSB1_3C-sc-2280310 genome assembly,
1927384373	LR890266.1	Escherichia coli isolate MSB1_3C-sc-2280310 genome assembly, plasmid: 5	Escherichia coli isolate MSB1_3C-sc-2280310 genome assembly,
1927385476	LR890577.1	Escherichia coli isolate MSB1_5C-sc-2280313 genome assembly, plasmid: 2	Escherichia coli isolate MSB1_5C-sc-2280313 genome assembly,
1927385477	LR890578.1	Escherichia coli isolate MSB1_5C-sc-2280313 genome assembly, plasmid: 3	Escherichia coli isolate MSB1_5C-sc-2280313 genome assembly,
1927385478	LR890579.1	Escherichia coli isolate MSB1_5C-sc-2280313 genome assembly, plasmid: 4	Escherichia coli isolate MSB1_5C-sc-2280313 genome assembly,
1927385479	LR890580.1	Escherichia coli isolate MSB1_5C-sc-2280313 genome assembly, plasmid: 5	Escherichia coli isolate MSB1_5C-sc-2280313 genome assembly,
1927385480	LR890581.1	Escherichia coli isolate MSB1_5C-sc-2280313 genome assembly, plasmid: 6	Escherichia coli isolate MSB1_5C-sc-2280313 genome assembly,
1927385481	LR890582.1	Escherichia coli isolate MSB1_5C-sc-2280313 genome assembly, plasmid: 7	Escherichia coli isolate MSB1_5C-sc-2280313 genome assembly,
1927385790	LR890662.1	Escherichia coli isolate MSB1_4G-sc-2280381 genome assembly, plasmid: 2	Escherichia coli isolate MSB1_4G-sc-2280381 genome assembly,
1927385791	LR890663.1	Escherichia coli isolate MSB1_4G-sc-2280381 genome assembly, plasmid: 3	Escherichia coli isolate MSB1_4G-sc-2280381 genome assembly,
1927385792	LR890664.1	Escherichia coli isolate MSB1_4G-sc-2280381 genome assembly, plasmid: 4	Escherichia coli isolate MSB1_4G-sc-2280381 genome assembly,
1928780894	CP044022.1	Escherichia coli strain 2492 plasmid p2492-1	Escherichia coli strain 2492
1928781025	CP044023.1	Escherichia coli strain 2492 plasmid p2492-2	Escherichia coli strain 2492
1928781115	CP044024.1	Escherichia coli strain 2492 plasmid p2492-3	Escherichia coli strain 2492
1928781189	CP044025.1	Escherichia coli strain 2492 plasmid p2492-4-MCR-1	Escherichia coli strain 2492
1928781256	CP044026.1	Escherichia coli strain 2492 plasmid p2492-5	Escherichia coli strain 2492
1928781282	CP044027.1	Escherichia coli strain 2492 plasmid p2492-6	Escherichia coli strain 2492
1951311818	NZ_AP024206.1	Escherichia coli strain TA8571 plasmid pTMTA85711	Escherichia coli strain TA8571
1951312051	NZ_AP024208.1	Escherichia coli strain TA8571 plasmid pTMTA85713	Escherichia coli strain TA8571
1951312052	NZ_AP024209.1	Escherichia coli strain TA8571 plasmid pTMTA85714	Escherichia coli strain TA8571
1951312269	NZ_AP024207.1	Escherichia coli strain TA8571 plasmid pTMTA85712	Escherichia coli strain TA8571
1955001660	NZ_AP022331.1	Escherichia coli O25:H4 strain 18044 plasmid p18044_5	Escherichia coli O25:H4 strain 18044
1955001661	NZ_AP022330.1	Escherichia coli O25:H4 strain 18044 plasmid p18044_4	Escherichia coli O25:H4 strain 18044
1955001662	NZ_AP022329.1	Escherichia coli O25:H4 strain 18044 plasmid p18044_3	Escherichia coli O25:H4 strain 18044
1955001711	NZ_AP022328.1	Escherichia coli O25:H4 strain 18044 plasmid p18044_2	Escherichia coli O25:H4 strain 18044
1955002312	NZ_AP022327.1	Escherichia coli O25:H4 strain 18044 plasmid p18044_1	Escherichia coli O25:H4 strain 18044
1957527185	NZ_AP022410.1	Escherichia coli strain STW0522-31 plasmid pSTW0522-31-1	Escherichia coli strain STW0522-31
1957527186	NZ_AP022411.1	Escherichia coli strain STW0522-31 plasmid pSTW0522-31-2	Escherichia coli strain STW0522-31
1957527451	NZ_AP022479.1	Escherichia coli strain STN0717-11 plasmid pSTN0717-11-1	Escherichia coli strain STN0717-11
1957527452	NZ_AP022480.1	Escherichia coli strain STN0717-11 plasmid pSTN0717-11-2	Escherichia coli strain STN0717-11
1957527453	NZ_AP022481.1	Escherichia coli strain STN0717-11 plasmid pSTN0717-11-3	Escherichia coli strain STN0717-11
1957527584	NZ_AP022526.1	Escherichia coli strain THO-003 plasmid pTHO-003-1	Escherichia coli strain THO-003
1957527626	NZ_AP022537.1	Escherichia coli strain THO-008 plasmid pTHO-008-1	Escherichia coli strain THO-008
1957527635	NZ_AP022538.1	Escherichia coli strain THO-008 plasmid pTHO-008-2	Escherichia coli strain THO-008
1957527637	NZ_AP022539.1	Escherichia coli strain THO-008 plasmid pTHO-008-3	Escherichia coli strain THO-008
1957528962	NZ_AP022534.1	Escherichia coli strain THO-006 plasmid pTHO-006-1	Escherichia coli strain THO-006
1957528963	NZ_AP022535.1	Escherichia coli strain THO-006 plasmid pTHO-006-2	Escherichia coli strain THO-006
1957535586	NZ_AP022541.1	Escherichia coli strain THO-010 plasmid pTHO-010-1	Escherichia coli strain THO-010
1957535590	NZ_AP022542.1	Escherichia coli strain THO-010 plasmid pTHO-010-2	Escherichia coli strain THO-010
1957535591	NZ_AP022543.1	Escherichia coli strain THO-010 plasmid pTHO-010-3	Escherichia coli strain THO-010
1957535592	NZ_AP022544.1	Escherichia coli strain THO-010 plasmid pTHO-010-4	Escherichia coli strain THO-010
1957535593	NZ_AP022545.1	Escherichia coli strain THO-010 plasmid pTHO-010-5	Escherichia coli strain THO-010
1957535594	NZ_AP022546.1	Escherichia coli strain THO-010 plasmid pTHO-010-6	Escherichia coli strain THO-010
1957535596	NZ_AP022550.1	Escherichia coli strain THO-015 plasmid pTHO-015-1	Escherichia coli strain THO-015
1957535597	NZ_AP022551.1	Escherichia coli strain THO-015 plasmid pTHO-015-2	Escherichia coli strain THO-015
1957535598	NZ_AP022552.1	Escherichia coli strain THO-015 plasmid pTHO-015-3	Escherichia coli strain THO-015
1957537039	NZ_AP022483.1	Escherichia coli strain STN0717-20 plasmid pSTN0717-20-1	Escherichia coli strain STN0717-20
1957537040	NZ_AP022484.1	Escherichia coli strain STN0717-20 plasmid pSTN0717-20-2	Escherichia coli strain STN0717-20
1957537041	NZ_AP022485.1	Escherichia coli strain STN0717-20 plasmid pSTN0717-20-3	Escherichia coli strain STN0717-20
1957579859	NZ_AP022816.1	Escherichia coli strain JE86-ST05 plasmid JE86-ST05_p1	Escherichia coli strain JE86-ST05
1957579860	NZ_AP022817.1	Escherichia coli strain JE86-ST05 plasmid JE86-ST05_p2	Escherichia coli strain JE86-ST05
1957579861	NZ_AP022818.1	Escherichia coli strain JE86-ST05 plasmid JE86-ST05_p3	Escherichia coli strain JE86-ST05
1957579862	NZ_AP022819.1	Escherichia coli strain JE86-ST05 plasmid JE86-ST05_p4	Escherichia coli strain JE86-ST05
1957579863	NZ_AP022820.1	Escherichia coli strain JE86-ST05 plasmid JE86-ST05_p5	Escherichia coli strain JE86-ST05
1957590211	NZ_AP022812.1	Escherichia coli strain JE86-ST02 plasmid JE86-ST02_p1	Escherichia coli strain JE86-ST02
1957590212	NZ_AP022813.1	Escherichia coli strain JE86-ST02 plasmid JE86-ST02_p2	Escherichia coli strain JE86-ST02
1957590213	NZ_AP022814.1	Escherichia coli strain JE86-ST02 plasmid JE86-ST02_p3	Escherichia coli strain JE86-ST02
2021923640	CP048936.1	Escherichia coli strain TCBK21G178 plasmid unnamed	Escherichia coli strain TCBK21G178
2023052480	CP071134.1	Escherichia coli strain ECONC427 plasmid p2_ECONC427	Escherichia coli strain ECONC427
2023052680	CP071135.1	Escherichia coli strain ECONC427 plasmid p1_ECONC427	Escherichia coli strain ECONC427
2023052877	CP071136.1	Escherichia coli strain ECONC427 plasmid p3_ECONC427	Escherichia coli strain ECONC427
2027070489	CP072912.1	Escherichia coli strain C5 plasmid unnamed	Escherichia coli strain C5
2030365333	NZ_AP023220.2	Escherichia coli strain M505 plasmid pM505-NDM5	Escherichia coli strain M505
2030365334	NZ_AP023221.2	Escherichia coli strain M505 plasmid pM505-a	Escherichia coli strain M505
2030365335	NZ_AP023222.2	Escherichia coli strain M505 plasmid pM505-b	Escherichia coli strain M505
2030365336	NZ_AP023223.2	Escherichia coli strain M505 plasmid pM505-c	Escherichia coli strain M505
2030365548	NZ_AP023231.2	Escherichia coli strain YJ4 plasmid pYJ4-NDM5	Escherichia coli strain YJ4
2030365549	NZ_AP023232.2	Escherichia coli strain YJ4 plasmid pYJ4-a	Escherichia coli strain YJ4
2030365550	NZ_AP023233.2	Escherichia coli strain YJ4 plasmid pYJ4-b	Escherichia coli strain YJ4
2030365551	NZ_AP023234.2	Escherichia coli strain YJ4 plasmid pYJ4-c	Escherichia coli strain YJ4
2039933023	NZ_AP024583.1	Escherichia coli strain Ec387 plasmid p1-Ec387	Escherichia coli strain Ec387
2039933086	NZ_AP024584.1	Escherichia coli strain Ec387 plasmid p2-Ec387	Escherichia coli strain Ec387
2049945440	CP076294.1	Escherichia coli strain Y18J plasmid unnamed1	Escherichia coli strain Y18J
2049945486	CP076295.1	Escherichia coli strain Y18J plasmid unnamed2	Escherichia coli strain Y18J
2049945521	CP076296.1	Escherichia coli strain Y18J plasmid unnamed3	Escherichia coli strain Y18J
2058286089	CP077064.1	Escherichia coli strain Q4552 plasmid pECQ4552_mcr-3	Escherichia coli strain Q4552
2058286178	CP077065.1	Escherichia coli strain Q4552 plasmid pECQ4552_IHU02	Escherichia coli strain Q4552
2058286213	CP077066.1	Escherichia coli strain Q4552 plasmid pECQ4552_IHU03	Escherichia coli strain Q4552
2058286231	CP077067.1	Escherichia coli strain Q4552 plasmid pECQ4552_IHU04	Escherichia coli strain Q4552
2058286239	CP077068.1	Escherichia coli strain Q4552 plasmid pECQ4552_IHU05	Escherichia coli strain Q4552
2058286246	CP077069.1	Escherichia coli strain Q4552 plasmid pECQ4552_IHU06	Escherichia coli strain Q4552
2058286254	CP077070.1	Escherichia coli strain Q4552 plasmid pECQ4552_IHU07	Escherichia coli strain Q4552
2058286257	CP077071.1	Escherichia coli strain Q4552 plasmid pECQ4552_IHU08	Escherichia coli strain Q4552
2082591887	NZ_AP024124.1	Escherichia coli strain KS-NP019 plasmid KS-NP019_P1	Escherichia coli strain KS-NP019
2082591888	NZ_AP024125.1	Escherichia coli strain KS-NP019 plasmid KS-NP019_P2	Escherichia coli strain KS-NP019
2082591940	NZ_AP024115.1	Escherichia coli strain JML285 plasmid JML285_P1	Escherichia coli strain JML285
2082591941	NZ_AP024116.1	Escherichia coli strain JML285 plasmid JML285_P2	Escherichia coli strain JML285
2082591942	NZ_AP024117.1	Escherichia coli strain JML285 plasmid JML285_P3	Escherichia coli strain JML285
2082591943	NZ_AP024118.1	Escherichia coli strain JML285 plasmid JML285_P4	Escherichia coli strain JML285
2082591944	NZ_AP024119.1	Escherichia coli strain JML285 plasmid JML285_P5	Escherichia coli strain JML285
2082591945	NZ_AP024120.1	Escherichia coli strain JML285 plasmid JML285_P6	Escherichia coli strain JML285
2082591946	NZ_AP024121.1	Escherichia coli strain JML285 plasmid JML285_P7	Escherichia coli strain JML285
2082591947	NZ_AP024122.1	Escherichia coli strain JML285 plasmid JML285_P8	Escherichia coli strain JML285
2082592487	NZ_AP024127.1	Escherichia coli strain NS-NP030 plasmid NS-NP030_P1	Escherichia coli strain NS-NP030
2082592488	NZ_AP024128.1	Escherichia coli strain NS-NP030 plasmid NS-NP030_P2	Escherichia coli strain NS-NP030
2082592489	NZ_AP024129.1	Escherichia coli strain NS-NP030 plasmid NS-NP030_P3	Escherichia coli strain NS-NP030
2082746204	NZ_AP024113.1	Escherichia coli strain ECSC054 plasmid ECSC054_P1	Escherichia coli strain ECSC054
2090195609	CP082328.1	Escherichia coli strain EC1390 plasmid pEC1390-2	Escherichia coli strain EC1390
2090195639	CP082329.1	Escherichia coli strain EC1390 plasmid pEC1390-1	Escherichia coli strain EC1390
2102798576	NZ_AP024519.1	Escherichia coli strain E148 plasmid pE148-1	Escherichia coli strain E148
2102798579	NZ_AP024520.1	Escherichia coli strain E148 plasmid pE148-2	Escherichia coli strain E148
2102805624	NZ_AP024522.1	Escherichia coli strain E189 plasmid pE189-1	Escherichia coli strain E189
2103001882	NZ_AP024688.1	Escherichia coli strain FUJ80154 plasmid pFUJ80154-1	Escherichia coli strain FUJ80154
2103002029	NZ_AP024689.1	Escherichia coli strain FUJ80154 plasmid pFUJ80154-2	Escherichia coli strain FUJ80154
2103002030	NZ_AP024690.1	Escherichia coli strain FUJ80154 plasmid pFUJ80154-3	Escherichia coli strain FUJ80154
2103002031	NZ_AP024691.1	Escherichia coli strain FUJ80154 plasmid pFUJ80154-4	Escherichia coli strain FUJ80154
2103002032	NZ_AP024692.1	Escherichia coli strain FUJ80154 plasmid pFUJ80154-5	Escherichia coli strain FUJ80154
2103002139	NZ_AP024693.1	Escherichia coli strain FUJ80154 plasmid pFUJ80154-6	Escherichia coli strain FUJ80154
2125169374	CP085356.1	Escherichia coli strain NDM7 plasmid unnamed1	Escherichia coli strain NDM7
2125169508	CP085359.1	Escherichia coli strain NDM7 plasmid unnamed2	Escherichia coli strain NDM7
2126419743	CP085518.1	Escherichia coli strain QH20-4D3-1 plasmid p4D31-1	Escherichia coli strain QH20-4D3-1
2126419852	CP085519.1	Escherichia coli strain QH20-4D3-1 plasmid p4D31-2	Escherichia coli strain QH20-4D3-1
2126419921	CP085520.1	Escherichia coli strain QH20-4D3-1 plasmid pMCR4D31-3	Escherichia coli strain QH20-4D3-1
2126419990	CP085521.1	Escherichia coli strain QH20-4D3-1 plasmid p4D31-4	Escherichia coli strain QH20-4D3-1
2126420064	CP085522.1	Escherichia coli strain QH20-4D3-1 plasmid p4D31-5	Escherichia coli strain QH20-4D3-1
2126420081	CP085523.1	Escherichia coli strain QH20-4D3-1 plasmid p4D31-6	Escherichia coli strain QH20-4D3-1
2153918888	NZ_AP025207.1	Escherichia coli strain 2017.04.03CC plasmid p20170403CC-2	Escherichia coli strain 2017.04.03CC
2153918927	NZ_AP025208.1	Escherichia coli strain 2017.04.03CC plasmid p20170403CC-3	Escherichia coli strain 2017.04.03CC
2154432695	NZ_AP025221.1	Escherichia coli strain 2017.11.01CC plasmid p20171101CC-1	Escherichia coli strain 2017.11.01CC
2154432707	NZ_AP025222.1	Escherichia coli strain 2017.11.01CC plasmid p20171101CC-2	Escherichia coli strain 2017.11.01CC
2154432712	NZ_AP025223.1	Escherichia coli strain 2017.11.01CC plasmid p20171101CC-3	Escherichia coli strain 2017.11.01CC
2154437034	NZ_AP025211.1	Escherichia coli strain 2017.06.04CC plasmid p20170604CC-2	Escherichia coli strain 2017.06.04CC
2154437039	NZ_AP025212.1	Escherichia coli strain 2017.06.04CC plasmid p20170604CC-3	Escherichia coli strain 2017.06.04CC
2154437043	NZ_AP025213.1	Escherichia coli strain 2017.06.04CC plasmid p20170604CC-4	Escherichia coli strain 2017.06.04CC
2154440965	NZ_AP025215.1	Escherichia coli strain 2017.09.02CC plasmid p20170902CC-1	Escherichia coli strain 2017.09.02CC
2154440984	NZ_AP025216.1	Escherichia coli strain 2017.09.02CC plasmid p20170902CC-2	Escherichia coli strain 2017.09.02CC
2154440994	NZ_AP025217.1	Escherichia coli strain 2017.09.02CC plasmid p20170902CC-3	Escherichia coli strain 2017.09.02CC
2154440997	NZ_AP025218.1	Escherichia coli strain 2017.09.02CC plasmid p20170902CC-4	Escherichia coli strain 2017.09.02CC
2154441000	NZ_AP025219.1	Escherichia coli strain 2017.09.02CC plasmid p20170902CC-5	Escherichia coli strain 2017.09.02CC
2182326462	CP054240.1	Escherichia coli strain STO_Bone7 plasmid pBone7_2	Escherichia coli strain STO_Bone7
2182326476	CP054241.1	Escherichia coli strain STO_Bone7 plasmid pBone7_3	Escherichia coli strain STO_Bone7
2182327098	CP054242.1	Escherichia coli strain STO_Bone7 plasmid pBone7_4	Escherichia coli strain STO_Bone7
2182327104	CP054243.1	Escherichia coli strain STO_Bone7 plasmid pBone7IncF	Escherichia coli strain STO_Bone7
2182327216	CP054244.1	Escherichia coli strain STO_Bone8 plasmid pBone8_2	Escherichia coli strain STO_Bone8
2182330065	CP054246.1	Escherichia coli strain STO_Bone8 plasmid pBone8_3	Escherichia coli strain STO_Bone8
2182330075	CP054247.1	Escherichia coli strain STO_Bone8 plasmid pBone8IncF	Escherichia coli strain STO_Bone8
2182330217	CP054248.1	Escherichia coli strain STO_Bone4 plasmid pBone4_5	Escherichia coli strain STO_Bone4
2182330697	CP054249.1	Escherichia coli strain STO_Bone4 plasmid pBone4_2	Escherichia coli strain STO_Bone4
2182330718	CP054250.1	Escherichia coli strain STO_Bone4 plasmid pBone4IncF	Escherichia coli strain STO_Bone4
2182334218	CP054252.1	Escherichia coli strain STO_Bone4 plasmid pBone4_3	Escherichia coli strain STO_Bone4
2182334234	CP054253.1	Escherichia coli strain STO_Bone4 plasmid pBone4_4	Escherichia coli strain STO_Bone4
2184284313	NZ_AP025210.2	Escherichia coli strain 2017.06.04CC plasmid p20170604CC-1	Escherichia coli strain 2017.06.04CC
2184334376	NZ_AP025206.2	Escherichia coli strain 2017.04.03CC plasmid p20170403CC-1	Escherichia coli strain 2017.04.03CC
2198263462	CP091428.1	Escherichia coli strain 1000C-3 plasmid pMHW-2	Escherichia coli strain 1000C-3
2198263471	CP091429.1	Escherichia coli strain 1000C-3 plasmid pMHW-1	Escherichia coli strain 1000C-3
2198361785	CP058710.1	Escherichia coli strain S163-2 plasmid pS163-2.1	Escherichia coli strain S163-2
2198361786	CP058711.1	Escherichia coli strain S163-2 plasmid pS163-2.2	Escherichia coli strain S163-2
2198361787	CP058712.1	Escherichia coli strain S163-2 plasmid pS163-2.3	Escherichia coli strain S163-2
2198361804	CP058713.1	Escherichia coli strain S163-2 plasmid pS163-2.4	Escherichia coli strain S163-2
2198362441	CP058715.1	Escherichia coli strain M172-1 plasmid pM172-1.1	Escherichia coli strain M172-1
2198362456	CP058716.1	Escherichia coli strain M172-1 plasmid pM172-1.2	Escherichia coli strain M172-1
2198362504	CP058717.1	Escherichia coli strain M172-1 plasmid pM172-1.3	Escherichia coli strain M172-1
2198362545	CP058718.1	Escherichia coli strain M172-1 plasmid pM172-1.4	Escherichia coli strain M172-1
2198363112	CP058720.1	Escherichia coli strain M159-1 plasmid pM159-1.1	Escherichia coli strain M159-1
2198363128	CP058721.1	Escherichia coli strain M159-1 plasmid pM159-1.2	Escherichia coli strain M159-1
2198363131	CP058722.1	Escherichia coli strain M159-1 plasmid pM159-1.3	Escherichia coli strain M159-1
2198363134	CP058723.1	Escherichia coli strain M159-1 plasmid pM159-1.4	Escherichia coli strain M159-1
2198363192	CP058724.1	Escherichia coli strain M159-1 plasmid pM159-1.5	Escherichia coli strain M159-1
2198376566	CP058726.1	Escherichia coli strain S171-1 plasmid pS171-1.1	Escherichia coli strain S171-1
2198376569	CP058727.1	Escherichia coli strain S171-1 plasmid pS171-1.2	Escherichia coli strain S171-1
2198376571	CP058728.1	Escherichia coli strain S171-1 plasmid pS171-1.3	Escherichia coli strain S171-1
2199039249	CP092453.1	Escherichia coli isolate TKEC21-59 plasmid pTKEC21-59-tetX-86kb	Escherichia coli isolate TKEC21-59
2199051917	CP092450.1	Escherichia coli isolate TKEC21-17 plasmid pTKEC21-17-tetX-91kb	Escherichia coli isolate TKEC21-17
2199051991	CP092451.1	Escherichia coli isolate TKEC21-17 plasmid pTKEC21-17-46kb	Escherichia coli isolate TKEC21-17
749197697	NZ_CP010372.1	Escherichia coli strain 6409 plasmid p6409-151.583kb	Escherichia coli strain 6409
749205894	NZ_CP010305.1	Escherichia coli O157:H7 str. SS52 plasmid p0157	Escherichia coli O157:H7 str. SS52
749299151	NZ_CP009860.1	Escherichia coli strain ECONIH1 plasmid pECO-824	Escherichia coli strain ECONIH1
749299162	NZ_CP009861.1	Escherichia coli strain ECONIH1 plasmid pECO-b75	Escherichia coli strain ECONIH1
749299168	NZ_CP009862.1	Escherichia coli strain ECONIH1 plasmid pKPC-629	Escherichia coli strain ECONIH1
753216277	NZ_CP010345.1	Escherichia coli ECC-1470 plasmid pECC-1470_100	Escherichia coli ECC-1470
764385945	NZ_CP010877.1	Escherichia coli strain MNCRE44 plasmid pMNCRE44_1	Escherichia coli strain MNCRE44
764385952	NZ_CP010878.1	Escherichia coli strain MNCRE44 plasmid pMNCRE44_2	Escherichia coli strain MNCRE44
764385962	NZ_CP010879.1	Escherichia coli strain MNCRE44 plasmid pMNCRE44_3	Escherichia coli strain MNCRE44
764386164	NZ_CP010880.1	Escherichia coli strain MNCRE44 plasmid pMNCRE44_4	Escherichia coli strain MNCRE44
764386897	NZ_CP010881.1	Escherichia coli strain MNCRE44 plasmid pMNCRE44_5	Escherichia coli strain MNCRE44
764387441	NZ_CP010882.1	Escherichia coli strain MNCRE44 plasmid pMNCRE44_6	Escherichia coli strain MNCRE44
764931975	NZ_CP010316.1	Escherichia coli strain 789 plasmid pAPEC-O78-ColV	Escherichia coli strain 789
764932036	NZ_CP010317.1	Escherichia coli strain 789 plasmid pAPEC-O78-2	Escherichia coli strain 789
764932038	NZ_CP010318.1	Escherichia coli strain 789 plasmid pAPEC-O78-3	Escherichia coli strain 789
765472463	NZ_CP010373.2	Escherichia coli strain 6409 plasmid p6409-202.186kb	Escherichia coli strain 6409
803470235	NZ_CP011135.1	Escherichia coli VR50 plasmid pVR50A	Escherichia coli VR50
803470247	NZ_CP011136.1	Escherichia coli VR50 plasmid pVR50B	Escherichia coli VR50
803470251	NZ_CP011137.1	Escherichia coli VR50 plasmid pVR50C	Escherichia coli VR50
803470254	NZ_CP011138.1	Escherichia coli VR50 plasmid pVR50D	Escherichia coli VR50
803470256	NZ_CP011139.1	Escherichia coli VR50 plasmid pVR50E	Escherichia coli VR50
803470257	NZ_CP011140.1	Escherichia coli VR50 plasmid pVR50F	Escherichia coli VR50
803470258	NZ_CP011141.1	Escherichia coli VR50 plasmid pVR50G	Escherichia coli VR50
803470259	NZ_CP011142.1	Escherichia coli VR50 plasmid pVR50H	Escherichia coli VR50
803470260	NZ_CP011143.1	Escherichia coli VR50 plasmid pVR50I	Escherichia coli VR50
808032773	NZ_CP011019.1	Escherichia coli strain CI5 plasmid unnamed	Escherichia coli strain CI5
817696111	NZ_CP011332.1	Escherichia coli O104:H4 str. C227-11 isolate 368 shch plasmid unnamed	Escherichia coli O104:H4 str. C227-11 isolate 368 shch
817696126	NZ_CP011333.1	Escherichia coli O104:H4 str. C227-11 isolate 368 shch plasmid unnamed	Escherichia coli O104:H4 str. C227-11 isolate 368 shch
817696130	NZ_CP011334.1	Escherichia coli O104:H4 str. C227-11 isolate 368 shch plasmid unnamed	Escherichia coli O104:H4 str. C227-11 isolate 368 shch
817696133	NZ_CP011335.1	Escherichia coli O104:H4 str. C227-11 isolate 368 shch plasmid unnamed	Escherichia coli O104:H4 str. C227-11 isolate 368 shch
817696140	NZ_CP011336.1	Escherichia coli O104:H4 str. C227-11 isolate 368 shch plasmid unnamed	Escherichia coli O104:H4 str. C227-11 isolate 368 shch
817696148	NZ_CP011337.1	Escherichia coli O104:H4 str. C227-11 isolate 368 shch plasmid unnamed	Escherichia coli O104:H4 str. C227-11 isolate 368 shch
817696152	NZ_CP011338.1	Escherichia coli O104:H4 str. C227-11 isolate 368 shch plasmid unnamed	Escherichia coli O104:H4 str. C227-11 isolate 368 shch
822022706	NZ_CP011417.1	Escherichia coli strain CFSAN029787 plasmid pCFSAN029787_01	Escherichia coli strain CFSAN029787
822022707	NZ_CP011418.1	Escherichia coli strain CFSAN029787 plasmid pCFSAN029787_02	Escherichia coli strain CFSAN029787
874443590	NZ_CP011496.1	Escherichia coli strain NCM3722 isolate K-12 plasmid F	Escherichia coli strain NCM3722 isolate K-12
927318059	NZ_CP012632.1	Escherichia coli strain SF-173 plasmid pSF-173-1	Escherichia coli strain SF-173
974632384	NZ_CP013832.1	Escherichia coli strain CD306 plasmid pCD306	Escherichia coli strain CD306
974632734	NZ_CP013833.1	Escherichia coli strain JJ2434 plasmid pJJ2434_1	Escherichia coli strain JJ2434
974632737	NZ_CP013834.1	Escherichia coli strain JJ2434 plasmid pJJ2434_2	Escherichia coli strain JJ2434
983374763	NZ_CP013028.1	Escherichia coli strain 2012C-4227 plasmid unnamed1	Escherichia coli strain 2012C-4227
983375313	NZ_CP013030.1	Escherichia coli strain 2012C-4227 plasmid unnamed2	Escherichia coli strain 2012C-4227
983388465	NZ_CP013024.1	Escherichia coli strain 2009C-3133 plasmid unnamed1	Escherichia coli strain 2009C-3133
983388786	NZ_CP013026.1	Escherichia coli strain 2009C-3133 plasmid unnamed2	Escherichia coli strain 2009C-3133
983388787	NZ_CP013027.1	Escherichia coli strain 2009C-3133 plasmid unnamed3	Escherichia coli strain 2009C-3133
983515332	NZ_CP013657.1	Escherichia coli strain uk_P46212 plasmid unnamed	Escherichia coli strain uk_P46212
983530741	NZ_CP012636.1	Escherichia coli strain SF-088 plasmid pSF-088-1	Escherichia coli strain SF-088
983530743	NZ_CP012637.1	Escherichia coli strain SF-088 plasmid pSF-088-2	Escherichia coli strain SF-088
983530745	NZ_CP012638.1	Escherichia coli strain SF-088 plasmid pSF-088-3	Escherichia coli strain SF-088
983552074	NZ_CP012634.1	Escherichia coli strain SF-166 plasmid pSF-166-1	Escherichia coli strain SF-166
983559882	NZ_CP012626.1	Escherichia coli strain SF-468 plasmid pSF-468-1	Escherichia coli strain SF-468
983559883	NZ_CP012627.1	Escherichia coli strain SF-468 plasmid pSF-468-2	Escherichia coli strain SF-468
983559884	NZ_CP012628.1	Escherichia coli strain SF-468 plasmid pSF-468-3	Escherichia coli strain SF-468
983559885	NZ_CP012629.1	Escherichia coli strain SF-468 plasmid pSF-468-4	Escherichia coli strain SF-468
983559886	NZ_CP012630.1	Escherichia coli strain SF-468 plasmid pSF-468-5	Escherichia coli strain SF-468
983572458	NZ_CP012803.1	Escherichia coli O157:H7 strain WS4202 isolate laboratory strain plasmid pO157-WS4202	Escherichia coli O157:H7 strain WS4202
983572459	NZ_CP012804.1	Escherichia coli O157:H7 strain WS4202 isolate laboratory strain plasmid pOSAK1-WS4202	Escherichia coli O157:H7 strain WS4202
992379440	NZ_CP014273.1	Escherichia coli K-12 strain K-12 C3026 plasmid F128-(C3026)	Escherichia coli K-12 strain K-12 C3026
992381545	NZ_CP014271.1	Escherichia coli K-12 strain K-12 DHB4 plasmid F128-(DHB4)	Escherichia coli K-12 strain K-12 DHB4
1000874266	NZ_CP014498.1	Escherichia coli strain ZH193 plasmid pZH193	Escherichia coli strain ZH193
1000909433	NZ_CP014489.1	Escherichia coli strain G749 plasmid pG749_1	Escherichia coli strain G749
1000909434	NZ_CP014490.1	Escherichia coli strain G749 plasmid pG749_2	Escherichia coli strain G749
1000909435	NZ_CP014491.1	Escherichia coli strain G749 plasmid pG749_3	Escherichia coli strain G749
1000987220	NZ_CP014496.1	Escherichia coli strain SaT040 plasmid pSaT040	Escherichia coli strain SaT040
1002315914	NZ_CP014523.1	Escherichia coli strain ZH063 plasmid pZH063_1	Escherichia coli strain ZH063
1002315918	NZ_CP014524.1	Escherichia coli strain ZH063 plasmid pZH063_2	Escherichia coli strain ZH063
1007452474	NZ_CP014317.1	Escherichia coli JJ1887 plasmid pJJ1887-1	Escherichia coli JJ1887
1007452477	NZ_CP014318.1	Escherichia coli JJ1887 plasmid pJJ1887-2	Escherichia coli JJ1887
1007452480	NZ_CP014319.1	Escherichia coli JJ1887 plasmid pJJ1887-3	Escherichia coli JJ1887
1007452494	NZ_CP014320.1	Escherichia coli JJ1887 plasmid pJJ1887-5	Escherichia coli JJ1887
1007452506	NZ_CP014321.1	Escherichia coli JJ1887 plasmid pJJ1887-4	Escherichia coli JJ1887
1016070220	NZ_CP011062.1	Escherichia coli str. Sanji plasmid pSJ_255	Escherichia coli str. Sanji
1016070221	NZ_CP011063.1	Escherichia coli str. Sanji plasmid pSJ_98	Escherichia coli str. Sanji
1016070222	NZ_CP011064.1	Escherichia coli str. Sanji plasmid pSJ_94	Escherichia coli str. Sanji
1016070223	NZ_CP011065.1	Escherichia coli str. Sanji plasmid pSJ_82	Escherichia coli str. Sanji
1016070224	NZ_CP011066.1	Escherichia coli str. Sanji plasmid pSJ_3	Escherichia coli str. Sanji
1016070225	NZ_CP011067.1	Escherichia coli str. Sanji plasmid pSJ_2	Escherichia coli str. Sanji
1016104113	NZ_CP015022.1	Escherichia coli strain SRCC 1675 plasmid pSRCC 1675	Escherichia coli strain SRCC 1675
1016104206	NZ_CP015021.1	Escherichia coli strain 28RC1 plasmid p28RC1	Escherichia coli strain 28RC1
1016540650	NZ_CP015139.1	Escherichia coli strain Ecol_732 plasmid pEC732_IMP14	Escherichia coli strain Ecol_732
1016540664	NZ_CP015140.1	Escherichia coli strain Ecol_732 plasmid pEC732_2	Escherichia coli strain Ecol_732
1016540674	NZ_CP015141.1	Escherichia coli strain Ecol_732 plasmid pEC732_3	Escherichia coli strain Ecol_732
1016540680	NZ_CP015142.1	Escherichia coli strain Ecol_732 plasmid pEC732_4	Escherichia coli strain Ecol_732
1016540681	NZ_CP015143.1	Escherichia coli strain Ecol_732 plasmid pEC732_5	Escherichia coli strain Ecol_732
1016540683	NZ_CP015144.1	Escherichia coli strain Ecol_732 plasmid pEC732_6	Escherichia coli strain Ecol_732
1016879264	NZ_CP015077.1	Escherichia coli strain Ecol_448 plasmid pEC448_1	Escherichia coli strain Ecol_448
1016879265	NZ_CP015078.1	Escherichia coli strain Ecol_448 plasmid pEC448_OXA163	Escherichia coli strain Ecol_448
1016879308	NZ_CP015070.1	Escherichia coli strain Ecol_743 plasmid pEC743_1	Escherichia coli strain Ecol_743
1016879309	NZ_CP015071.1	Escherichia coli strain Ecol_743 plasmid pEC743_OXA48	Escherichia coli strain Ecol_743
1016879310	NZ_CP015072.1	Escherichia coli strain Ecol_743 plasmid pEC743_3	Escherichia coli strain Ecol_743
1016879311	NZ_CP015073.1	Escherichia coli strain Ecol_743 plasmid pEC743_4	Escherichia coli strain Ecol_743
1028865080	NZ_CP015242.1	Escherichia coli strain 2013C-4465 plasmid unnamed1	Escherichia coli strain 2013C-4465
1028891028	NZ_CP015239.1	Escherichia coli strain 2011C-3911 plasmid unnamed1	Escherichia coli strain 2011C-3911
1032343949	NZ_CP015816.1	Escherichia coli O157:H7 strain JEONG-1266 plasmid p0157	Escherichia coli O157:H7 strain JEONG-1266
1032607515	NZ_CP015833.1	Escherichia coli O157 strain 180-PT54 plasmid unnamed	Escherichia coli O157 strain 180-PT54
1035848744	NZ_CP015996.1	Escherichia coli strain S51 plasmid pS51_1	Escherichia coli strain S51
1035848777	NZ_CP015997.1	Escherichia coli strain S51 plasmid pS51_2	Escherichia coli strain S51
1035850865	NZ_CP016008.1	Escherichia coli strain NGF1 plasmid pNGF1_pCROD2_like	Escherichia coli strain NGF1
1035850872	NZ_CP016009.1	Escherichia coli strain NGF1 plasmid pNGF1_pCol_let_like	Escherichia coli strain NGF1
1039515083	NZ_CP015160.1	Escherichia coli strain Eco889 plasmid pECO-fce	Escherichia coli strain Eco889
1039515084	NZ_CP015161.1	Escherichia coli strain Eco889 plasmid pECO-93a	Escherichia coli strain Eco889
1040120888	NZ_CP014668.1	Escherichia coli strain ECONIH2 plasmid pECO-bc6	Escherichia coli strain ECONIH2
1040121020	NZ_CP014669.1	Escherichia coli strain ECONIH2 plasmid pKpQIL-571	Escherichia coli strain ECONIH2
1041861066	NZ_CP012501.1	Escherichia coli strain 08-00022 plasmid pCFSAN004179G	Escherichia coli strain 08-00022
1041864041	NZ_CP012500.1	Escherichia coli strain 09-00049 plasmid pCFSAN004180G	Escherichia coli strain 09-00049
1041866614	NZ_CP012498.1	Escherichia coli strain 06-00048 isolate CFSAN004178 plasmid pCFSAN004178P_02	Escherichia coli strain 06-00048
1042221536	NZ_CP012499.1	Escherichia coli strain GB089 plasmid pCFSAN004181P	Escherichia coli strain GB089
1042742240	NZ_CP015913.1	Escherichia coli strain 210205630 isolate 210205630 plasmid pSLy1	Escherichia coli strain 210205630
1042742241	NZ_CP015914.1	Escherichia coli strain 210205630 isolate 210205630 plasmid pSLy2	Escherichia coli strain 210205630
1042742551	NZ_CP015915.1	Escherichia coli strain 210205630 isolate 210205630 plasmid pSLy3	Escherichia coli strain 210205630
1042742552	NZ_CP015916.1	Escherichia coli strain 210205630 isolate 210205630 plasmid pSLy4	Escherichia coli strain 210205630
1042742853	NZ_CP015917.1	Escherichia coli strain 210205630 isolate 210205630 plasmid pSLy5	Escherichia coli strain 210205630
1045495277	NZ_CP015075.2	Escherichia coli strain Ecol_745 plasmid pEC745_OXA48	Escherichia coli strain Ecol_745
1047345927	NZ_CP016498.1	Escherichia coli strain UPEC 26-1 plasmid unnamed1	Escherichia coli strain UPEC 26-1
1047431325	NZ_CP016547.1	Escherichia coli strain O177:H21 plasmid unnamed1	Escherichia coli strain O177:H21
1047431331	NZ_CP016548.1	Escherichia coli strain O177:H21 plasmid unnamed2	Escherichia coli strain O177:H21
1047431337	NZ_CP016549.1	Escherichia coli strain O177:H21 plasmid unnamed3	Escherichia coli strain O177:H21
1047431342	NZ_CP016550.1	Escherichia coli strain O177:H21 plasmid unnamed4	Escherichia coli strain O177:H21
1047431345	NZ_CP016551.1	Escherichia coli strain O177:H21 plasmid unnamed5	Escherichia coli strain O177:H21
1047838163	NZ_CP016626.1	Escherichia coli O157:H7 strain FRIK944 plasmid p0157	Escherichia coli O157:H7 strain FRIK944
1053253213	NZ_CP015856.1	Escherichia coli strain EDL933-1 plasmid pO157	Escherichia coli strain EDL933-1
1062996252	NZ_CP012491.1	Escherichia coli strain CFSAN004176 plasmid pCFSAN004176P_03	Escherichia coli strain CFSAN004176
1062996253	NZ_CP012492.1	Escherichia coli strain CFSAN004176 plasmid pCFSAN004176P_01	Escherichia coli strain CFSAN004176
1062996254	NZ_CP012493.1	Escherichia coli strain CFSAN004176 plasmid pCFSAN004176G_02	Escherichia coli strain CFSAN004176
1063302174	NZ_CP015835.1	Escherichia coli strain MS6198 plasmid pMS6198A	Escherichia coli strain MS6198
1063302175	NZ_CP015836.1	Escherichia coli strain MS6198 plasmid pMS6198B	Escherichia coli strain MS6198
1063302176	NZ_CP015837.1	Escherichia coli strain MS6198 plasmid pMS6198C	Escherichia coli strain MS6198
1063302177	NZ_CP015838.1	Escherichia coli strain MS6198 plasmid pMS6198D	Escherichia coli strain MS6198
1069460420	NZ_CP016405.1	Escherichia coli strain 210221272 plasmid pSLy21	Escherichia coli strain 210221272
1073099845	NZ_CP013191.1	Escherichia coli strain FORC_031 plasmid pFORC31.1	Escherichia coli strain FORC_031
1073099846	NZ_CP013192.1	Escherichia coli strain FORC_031 plasmid pFORC31.2	Escherichia coli strain FORC_031
1073099847	NZ_CP013193.1	Escherichia coli strain FORC_031 plasmid pFORC31.3	Escherichia coli strain FORC_031
1073099848	NZ_CP013194.1	Escherichia coli strain FORC_031 plasmid pFORC31.4	Escherichia coli strain FORC_031
1074973566	NZ_CP017437.1	Escherichia coli O157:H7 strain 2149 plasmid pO157	Escherichia coli O157:H7 strain 2149
1074974974	NZ_CP017447.1	Escherichia coli O157:H7 strain 9234 plasmid pO157	Escherichia coli O157:H7 strain 9234
1074979565	NZ_CP017443.1	Escherichia coli O157:H7 strain 4276 plasmid pO157	Escherichia coli O157:H7 strain 4276
1074980791	NZ_CP017435.1	Escherichia coli O157:H7 strain 1130 plasmid pO157	Escherichia coli O157:H7 strain 1130
1074982074	NZ_CP017441.1	Escherichia coli O157:H7 strain 3384 plasmid pO157	Escherichia coli O157:H7 strain 3384
1074983015	NZ_CP017445.1	Escherichia coli O157:H7 strain 8368 plasmid pO157	Escherichia coli O157:H7 strain 8368
1074990167	NZ_CP017439.1	Escherichia coli O157:H7 strain 2159 plasmid pO157	Escherichia coli O157:H7 strain 2159
1092493517	NZ_CP017250.1	Escherichia coli strain NADC 5570/86-24/6565 isolate mutant plasmid pO157	Escherichia coli strain NADC 5570/86-24/6565 isolate mutant
1092517603	NZ_CP017252.1	Escherichia coli strain NADC 5570/86-24/6564 isolate wild type plasmid pO157	Escherichia coli strain NADC 5570/86-24/6564 isolate wild type
1099134410	NZ_CP017670.1	Escherichia coli O157:H7 strain PA20 plasmid pO157	Escherichia coli O157:H7 strain PA20
1110715034	NZ_CP018116.1	Escherichia coli strain MRSN346638 plasmid pMRSN346638_119.3	Escherichia coli strain MRSN346638
1110715035	NZ_CP018117.1	Escherichia coli strain MRSN346638 plasmid pMRSN346638_67.9	Escherichia coli strain MRSN346638
1110715036	NZ_CP018118.1	Escherichia coli strain MRSN346638 plasmid pMRSN346638_64.5	Escherichia coli strain MRSN346638
1110715037	NZ_CP018119.1	Escherichia coli strain MRSN346638 plasmid pMRSN346638_61.1	Escherichia coli strain MRSN346638
1110715038	NZ_CP018120.1	Escherichia coli strain MRSN346638 plasmid pMRSN346638_5.3	Escherichia coli strain MRSN346638
1110715040	NZ_CP018110.1	Escherichia coli strain MRSN346595 plasmid pMRSN346595_120.3	Escherichia coli strain MRSN346595
1110715041	NZ_CP018111.1	Escherichia coli strain MRSN346595 plasmid pMRSN346595_67.9	Escherichia coli strain MRSN346595
1110715042	NZ_CP018112.1	Escherichia coli strain MRSN346595 plasmid pMRSN346595_64.5	Escherichia coli strain MRSN346595
1110715043	NZ_CP018113.1	Escherichia coli strain MRSN346595 plasmid pMRSN346595_62.2	Escherichia coli strain MRSN346595
1110715044	NZ_CP018114.1	Escherichia coli strain MRSN346595 plasmid pMRSN346595_5.3	Escherichia coli strain MRSN346595
1110735917	NZ_CP018122.1	Escherichia coli strain MRSN346355 plasmid pMRSN346355_120.3	Escherichia coli strain MRSN346355
1110735918	NZ_CP018123.1	Escherichia coli strain MRSN346355 plasmid pMRSN346355_67.9	Escherichia coli strain MRSN346355
1110735922	NZ_CP018124.1	Escherichia coli strain MRSN346355 plasmid pMRSN346355_65.5	Escherichia coli strain MRSN346355
1110735928	NZ_CP018125.1	Escherichia coli strain MRSN346355 plasmid pMRSN346355_61.1	Escherichia coli strain MRSN346355
1110735932	NZ_CP018126.1	Escherichia coli strain MRSN346355 plasmid pMRSN346355_5.3	Escherichia coli strain MRSN346355
1110748374	NZ_CP018104.1	Escherichia coli strain MRSN352231 plasmid pMR0716_tem1	Escherichia coli strain MRSN352231
1110748380	NZ_CP018105.1	Escherichia coli strain MRSN352231 plasmid pMR0716_PSE	Escherichia coli strain MRSN352231
1110748385	NZ_CP018106.1	Escherichia coli strain MRSN352231 plasmid pMR0716_mcr1	Escherichia coli strain MRSN352231
1110748389	NZ_CP018107.1	Escherichia coli strain MRSN352231 plasmid pMR0716_IncFII	Escherichia coli strain MRSN352231
1110748393	NZ_CP018108.1	Escherichia coli strain MRSN352231 plasmid pMR0716_ColRNAI	Escherichia coli strain MRSN352231
1119352861	NZ_CP017845.1	Escherichia coli strain FMU073332 plasmid pEcoFMU073332a	Escherichia coli strain FMU073332
1119352864	NZ_CP017846.1	Escherichia coli strain FMU073332 plasmid pEcoFMU073332b	Escherichia coli strain FMU073332
1119352868	NZ_CP017847.1	Escherichia coli strain FMU073332 plasmid pEcoFMU073332c	Escherichia coli strain FMU073332
1119352878	NZ_CP017848.1	Escherichia coli strain FMU073332 plasmid pEcoFMU07332d	Escherichia coli strain FMU073332
1119689741	NZ_CP018251.1	Escherichia coli strain 10671 plasmid pO157	Escherichia coli strain 10671
1119694568	NZ_CP018238.1	Escherichia coli strain 155 plasmid pO157	Escherichia coli strain 155
1119698878	NZ_CP018246.1	Escherichia coli strain 472 plasmid pO157	Escherichia coli strain 472
1119699291	NZ_CP018207.1	Escherichia coli strain MRSN346647 plasmid pMRSN346647_113.1	Escherichia coli strain MRSN346647
1119699292	NZ_CP018208.1	Escherichia coli strain MRSN346647 plasmid pMRSN346647_4.1	Escherichia coli strain MRSN346647
1119700901	NZ_CP018244.1	Escherichia coli strain 350 plasmid pO157	Escherichia coli strain 350
1119700975	NZ_CP018248.1	Escherichia coli strain 7784 plasmid pO157	Escherichia coli strain 7784
1119723494	NZ_CP018242.1	Escherichia coli strain 319 plasmid pO157	Escherichia coli strain 319
1119725896	NZ_CP018240.1	Escherichia coli strain 272 plasmid pO157	Escherichia coli strain 272
1119725932	NZ_CP018253.1	Escherichia coli strain 9000 plasmid pO157	Escherichia coli strain 9000
1121002783	NZ_CP010144.1	Escherichia coli strain D4 plasmid A	Escherichia coli strain D4
1121073746	NZ_CP010158.1	Escherichia coli strain D10 plasmid A	Escherichia coli strain D10
1121073747	NZ_CP010159.1	Escherichia coli strain D10 plasmid B	Escherichia coli strain D10
1121075330	NZ_CP010118.1	Escherichia coli strain C2 plasmid A	Escherichia coli strain C2
1121078133	NZ_CP010130.1	Escherichia coli strain C9 plasmid A	Escherichia coli strain C9
1121078134	NZ_CP010131.1	Escherichia coli strain C9 plasmid B	Escherichia coli strain C9
1121078563	NZ_CP010146.1	Escherichia coli strain D5 plasmid A	Escherichia coli strain D5
1121078565	NZ_CP010147.1	Escherichia coli strain D5 plasmid B	Escherichia coli strain D5
1121079044	NZ_CP010164.1	Escherichia coli strain H2 plasmid A	Escherichia coli strain H2
1121079045	NZ_CP010165.1	Escherichia coli strain H2 plasmid B	Escherichia coli strain H2
1121079046	NZ_CP010166.1	Escherichia coli strain H2 plasmid C	Escherichia coli strain H2
1121106720	NZ_CP010135.1	Escherichia coli strain D1 plasmid A	Escherichia coli strain D1
1121106731	NZ_CP010136.1	Escherichia coli strain D1 plasmid B	Escherichia coli strain D1
1121139935	NZ_CP010120.1	Escherichia coli strain C3 plasmid A	Escherichia coli strain C3
1121141238	NZ_CP010214.1	Escherichia coli strain M15 plasmid A	Escherichia coli strain M15
1121141249	NZ_CP010215.1	Escherichia coli strain M15 plasmid B	Escherichia coli strain M15
1121141256	NZ_CP010216.1	Escherichia coli strain M15 plasmid C	Escherichia coli strain M15
1121141259	NZ_CP010217.1	Escherichia coli strain M15 plasmid D	Escherichia coli strain M15
1121141264	NZ_CP010218.1	Escherichia coli strain M15 plasmid E	Escherichia coli strain M15
1121146393	NZ_CP010149.1	Escherichia coli strain D6 plasmid A	Escherichia coli strain D6
1121149181	NZ_CP010168.1	Escherichia coli strain H3 plasmid A	Escherichia coli strain H3
1121149840	NZ_CP010241.1	Escherichia coli strain C7 plasmid A	Escherichia coli strain C7
1121156515	NZ_CP010181.1	Escherichia coli strain M1 plasmid A	Escherichia coli strain M1
1121156532	NZ_CP010182.1	Escherichia coli strain M1 plasmid B	Escherichia coli strain M1
1121162210	NZ_CP010123.1	Escherichia coli strain C5 plasmid A	Escherichia coli strain C5
1121162323	NZ_CP010124.1	Escherichia coli strain C5 plasmid B	Escherichia coli strain C5
1121162447	NZ_CP010222.1	Escherichia coli strain M19 plasmid A	Escherichia coli strain M19
1121162486	NZ_CP010223.1	Escherichia coli strain M19 plasmid B	Escherichia coli strain M19
1121162501	NZ_CP010224.1	Escherichia coli strain M19 plasmid C	Escherichia coli strain M19
1121162509	NZ_CP010225.1	Escherichia coli strain M19 plasmid D	Escherichia coli strain M19
1121186627	NZ_CP010227.1	Escherichia coli strain S1 plasmid A	Escherichia coli strain S1
1121186848	NZ_CP010220.1	Escherichia coli strain M18 plasmid A	Escherichia coli strain M18
1121187039	NZ_CP010179.1	Escherichia coli strain H15 plasmid A	Escherichia coli strain H15
1121187110	NZ_CP010197.1	Escherichia coli strain M9 plasmid A	Escherichia coli strain M9
1121187111	NZ_CP010198.1	Escherichia coli strain M9 plasmid B	Escherichia coli strain M9
1121187112	NZ_CP010199.1	Escherichia coli strain M9 plasmid C	Escherichia coli strain M9
1121188566	NZ_CP010173.1	Escherichia coli strain H8 plasmid A	Escherichia coli strain H8
1121188577	NZ_CP010174.1	Escherichia coli strain H8 plasmid B	Escherichia coli strain H8
1121188583	NZ_CP010175.1	Escherichia coli strain H8 plasmid C	Escherichia coli strain H8
1121193663	NZ_CP010126.1	Escherichia coli strain C8 plasmid A	Escherichia coli strain C8
1121193664	NZ_CP010127.1	Escherichia coli strain C8 plasmid B	Escherichia coli strain C8
1121193665	NZ_CP010128.1	Escherichia coli strain C8 plasmid C	Escherichia coli strain C8
1121194409	NZ_CP010184.1	Escherichia coli strain M3 plasmid A	Escherichia coli strain M3
1121194410	NZ_CP010185.1	Escherichia coli strain M3 plasmid B	Escherichia coli strain M3
1121194796	NZ_CP010192.1	Escherichia coli strain M8 plasmid A	Escherichia coli strain M8
1121194797	NZ_CP010193.1	Escherichia coli strain M8 plasmid B	Escherichia coli strain M8
1121194798	NZ_CP010194.1	Escherichia coli strain M8 plasmid C	Escherichia coli strain M8
1121194799	NZ_CP010195.1	Escherichia coli strain M8 plasmid D	Escherichia coli strain M8
1121202372	NZ_CP010207.1	Escherichia coli strain M11 plasmid A	Escherichia coli strain M11
1121202373	NZ_CP010208.1	Escherichia coli strain M11 plasmid B	Escherichia coli strain M11
1121202374	NZ_CP010209.1	Escherichia coli strain M11 plasmid C	Escherichia coli strain M11
1121202375	NZ_CP010210.1	Escherichia coli strain M11 plasmid D	Escherichia coli strain M11
1121202376	NZ_CP010211.1	Escherichia coli strain M11 plasmid E	Escherichia coli strain M11
1121202377	NZ_CP010212.1	Escherichia coli strain M11 plasmid F	Escherichia coli strain M11
1121205057	NZ_CP010138.1	Escherichia coli strain D2 plasmid A	Escherichia coli strain D2
1121205058	NZ_CP010139.1	Escherichia coli strain D2 plasmid B	Escherichia coli strain D2
1121205883	NZ_CP010161.1	Escherichia coli strain H1 plasmid A	Escherichia coli strain H1
1121205884	NZ_CP010162.1	Escherichia coli strain H1 plasmid B	Escherichia coli strain H1
1121206400	NZ_CP010141.1	Escherichia coli strain D3 plasmid A	Escherichia coli strain D3
1121206401	NZ_CP010142.1	Escherichia coli strain D3 plasmid B	Escherichia coli strain D3
1121207902	NZ_CP010187.1	Escherichia coli strain M6 plasmid A	Escherichia coli strain M6
1121207903	NZ_CP010188.1	Escherichia coli strain M6 plasmid B	Escherichia coli strain M6
1121207904	NZ_CP010189.1	Escherichia coli strain M6 plasmid C	Escherichia coli strain M6
1121207905	NZ_CP010190.1	Escherichia coli strain M6 plasmid D	Escherichia coli strain M6
1121209242	NZ_CP010232.1	Escherichia coli strain S30 plasmid A	Escherichia coli strain S30
1121209243	NZ_CP010233.1	Escherichia coli strain S30 plasmid B	Escherichia coli strain S30
1121209244	NZ_CP010234.1	Escherichia coli strain S30 plasmid C	Escherichia coli strain S30
1121228802	NZ_CP010201.1	Escherichia coli strain M10 plasmid A	Escherichia coli strain M10
1121228803	NZ_CP010202.1	Escherichia coli strain M10 plasmid B	Escherichia coli strain M10
1121228804	NZ_CP010203.1	Escherichia coli strain M10 plasmid C	Escherichia coli strain M10
1121228805	NZ_CP010204.1	Escherichia coli strain M10 plasmid D	Escherichia coli strain M10
1121228806	NZ_CP010205.1	Escherichia coli strain M10 plasmid E	Escherichia coli strain M10
1121253681	NZ_CP010239.1	Escherichia coli strain S50 plasmid A	Escherichia coli strain S50
1122321267	NZ_CP010153.1	Escherichia coli strain D9 plasmid A	Escherichia coli strain D9
1122321268	NZ_CP010154.1	Escherichia coli strain D9 plasmid B	Escherichia coli strain D9
1122321269	NZ_CP010155.1	Escherichia coli strain D9 plasmid C	Escherichia coli strain D9
1122321270	NZ_CP010156.1	Escherichia coli strain D9 plasmid D	Escherichia coli strain D9
1122323079	NZ_CP010243.1	Escherichia coli strain S56 plasmid A	Escherichia coli strain S56
1122323080	NZ_CP010244.1	Escherichia coli strain S56 plasmid B	Escherichia coli strain S56
1122323081	NZ_CP010245.1	Escherichia coli strain S56 plasmid C	Escherichia coli strain S56
1129400275	NZ_CP017632.1	Escherichia coli strain SLK172 plasmid pSLK172-1	Escherichia coli strain SLK172
1129400276	NZ_CP017633.1	Escherichia coli strain SLK172 plasmid pSLK172-2	Escherichia coli strain SLK172
1130465470	NZ_CP018772.1	Escherichia coli strain 2016C-3936C1 plasmid unnamed2	Escherichia coli strain 2016C-3936C1
1151108836	NZ_CP019904.1	Escherichia coli strain MDR_56 plasmid unnamed1	Escherichia coli strain MDR_56
1151108837	NZ_CP019905.1	Escherichia coli strain MDR_56 plasmid unnamed6	Escherichia coli strain MDR_56
1151108838	NZ_CP019906.1	Escherichia coli strain MDR_56 plasmid unnamed5	Escherichia coli strain MDR_56
1151108839	NZ_CP019907.1	Escherichia coli strain MDR_56 plasmid unnamed2	Escherichia coli strain MDR_56
1151108840	NZ_CP019908.1	Escherichia coli strain MDR_56 plasmid pMCR1-NY	Escherichia coli strain MDR_56
1151108841	NZ_CP019909.1	Escherichia coli strain MDR_56 plasmid unnamed3	Escherichia coli strain MDR_56
1151108842	NZ_CP019910.1	Escherichia coli strain MDR_56 plasmid unnamed4	Escherichia coli strain MDR_56
1152286818	NZ_CP018954.1	Escherichia coli strain Ecol_316 plasmid pEC316_3	Escherichia coli strain Ecol_316
1152286836	NZ_CP018955.1	Escherichia coli strain Ecol_316 plasmid pEC316_2	Escherichia coli strain Ecol_316
1152286870	NZ_CP018956.1	Escherichia coli strain Ecol_316 plasmid pEC316_KPC	Escherichia coli strain Ecol_316
1152287513	NZ_CP018984.1	Escherichia coli strain Ecol_AZ146 plasmid pECAZ146_7	Escherichia coli strain Ecol_AZ146
1152287517	NZ_CP018985.1	Escherichia coli strain Ecol_AZ146 plasmid pECAZ146_6	Escherichia coli strain Ecol_AZ146
1152287521	NZ_CP018986.1	Escherichia coli strain Ecol_AZ146 plasmid pECAZ146_5	Escherichia coli strain Ecol_AZ146
1152287526	NZ_CP018987.1	Escherichia coli strain Ecol_AZ146 plasmid pECAZ146_4	Escherichia coli strain Ecol_AZ146
1152287533	NZ_CP018988.1	Escherichia coli strain Ecol_AZ146 plasmid pECAZ146_3	Escherichia coli strain Ecol_AZ146
1152287557	NZ_CP018989.1	Escherichia coli strain Ecol_AZ146 plasmid pECAZ146_KPC	Escherichia coli strain Ecol_AZ146
1152287580	NZ_CP018990.1	Escherichia coli strain Ecol_AZ146 plasmid pECAZ146_1	Escherichia coli strain Ecol_AZ146
1152289769	NZ_CP019009.1	Escherichia coli strain Ecol_AZ161 plasmid pECAZ161_3	Escherichia coli strain Ecol_AZ161
1152289770	NZ_CP019010.1	Escherichia coli strain Ecol_AZ161 plasmid pECAZ161_KPC	Escherichia coli strain Ecol_AZ161
1152289771	NZ_CP019011.1	Escherichia coli strain Ecol_AZ161 plasmid pECAZ161_1	Escherichia coli strain Ecol_AZ161
1152327776	NZ_CP018940.1	Escherichia coli strain Ecol_224 plasmid pEC224_8	Escherichia coli strain Ecol_224
1152327777	NZ_CP018941.1	Escherichia coli strain Ecol_224 plasmid pEC224_7	Escherichia coli strain Ecol_224
1152327778	NZ_CP018942.1	Escherichia coli strain Ecol_224 plasmid pEC224_6	Escherichia coli strain Ecol_224
1152327779	NZ_CP018943.1	Escherichia coli strain Ecol_224 plasmid pEC224_5	Escherichia coli strain Ecol_224
1152327780	NZ_CP018944.1	Escherichia coli strain Ecol_224 plasmid pEC224_4	Escherichia coli strain Ecol_224
1152327781	NZ_CP018945.1	Escherichia coli strain Ecol_224 plasmid pEC224_KPC	Escherichia coli strain Ecol_224
1152327782	NZ_CP018946.1	Escherichia coli strain Ecol_224 plasmid pEC224_2	Escherichia coli strain Ecol_224
1152327783	NZ_CP018947.1	Escherichia coli strain Ecol_224 plasmid pEC224_1	Escherichia coli strain Ecol_224
1152328209	NZ_CP018966.1	Escherichia coli strain Ecol_542 plasmid pEC542_4	Escherichia coli strain Ecol_542
1152328210	NZ_CP018967.1	Escherichia coli strain Ecol_542 plasmid pEC542_3	Escherichia coli strain Ecol_542
1152328211	NZ_CP018968.1	Escherichia coli strain Ecol_542 plasmid pEC542_KPC	Escherichia coli strain Ecol_542
1152328212	NZ_CP018969.1	Escherichia coli strain Ecol_542 plasmid pEC542_1	Escherichia coli strain Ecol_542
1152328523	NZ_CP018971.1	Escherichia coli strain Ecol_545 plasmid pEC545_5	Escherichia coli strain Ecol_545
1152328524	NZ_CP018972.1	Escherichia coli strain Ecol_545 plasmid pEC545_4	Escherichia coli strain Ecol_545
1152328525	NZ_CP018973.1	Escherichia coli strain Ecol_545 plasmid pEC545_3	Escherichia coli strain Ecol_545
1152328526	NZ_CP018974.1	Escherichia coli strain Ecol_545 plasmid pEC545_KPC	Escherichia coli strain Ecol_545
1152328527	NZ_CP018975.1	Escherichia coli strain Ecol_545 plasmid pEC545_1	Escherichia coli strain Ecol_545
1152329030	NZ_CP019001.1	Escherichia coli strain Ecol_AZ155 plasmid pECAZ155_KPC	Escherichia coli strain Ecol_AZ155
1152329031	NZ_CP019002.1	Escherichia coli strain Ecol_AZ155 plasmid pECAZ155_2	Escherichia coli strain Ecol_AZ155
1152329032	NZ_CP019003.1	Escherichia coli strain Ecol_AZ155 plasmid pECAZ155_3	Escherichia coli strain Ecol_AZ155
1152329033	NZ_CP019004.1	Escherichia coli strain Ecol_AZ155 plasmid pECAZ155_4	Escherichia coli strain Ecol_AZ155
1152329979	NZ_CP019021.1	Escherichia coli strain Ecol_881 plasmid pEC881_8	Escherichia coli strain Ecol_881
1152329980	NZ_CP019022.1	Escherichia coli strain Ecol_881 plasmid pEC881_7	Escherichia coli strain Ecol_881
1152329981	NZ_CP019023.1	Escherichia coli strain Ecol_881 plasmid pEC881_6	Escherichia coli strain Ecol_881
1152329982	NZ_CP019024.1	Escherichia coli strain Ecol_881 plasmid pEC881_5	Escherichia coli strain Ecol_881
1152329983	NZ_CP019025.1	Escherichia coli strain Ecol_881 plasmid pEC881_4	Escherichia coli strain Ecol_881
1152329984	NZ_CP019026.1	Escherichia coli strain Ecol_881 plasmid pEC881_KPC	Escherichia coli strain Ecol_881
1152329985	NZ_CP019027.1	Escherichia coli strain Ecol_881 plasmid pEC881_2	Escherichia coli strain Ecol_881
1152329986	NZ_CP019028.1	Escherichia coli strain Ecol_881 plasmid pEC881_1	Escherichia coli strain Ecol_881
1152339485	NZ_CP018949.1	Escherichia coli strain Ecol_276 plasmid pEC276_KPC	Escherichia coli strain Ecol_276
1152339489	NZ_CP018950.1	Escherichia coli strain Ecol_276 plasmid pEC276_3	Escherichia coli strain Ecol_276
1152339495	NZ_CP018951.1	Escherichia coli strain Ecol_276 plasmid pEC276_2	Escherichia coli strain Ecol_276
1152339518	NZ_CP018952.1	Escherichia coli strain Ecol_276 plasmid pEC276_1	Escherichia coli strain Ecol_276
1152339925	NZ_CP018977.1	Escherichia coli strain Ecol_656 plasmid pEC656_KPC	Escherichia coli strain Ecol_656
1152339929	NZ_CP018978.1	Escherichia coli strain Ecol_656 plasmid pEC656_1	Escherichia coli strain Ecol_656
1152340471	NZ_CP018980.1	Escherichia coli strain Ecol_867 plasmid pEC867_3	Escherichia coli strain Ecol_867
1152340473	NZ_CP018981.1	Escherichia coli strain Ecol_867 plasmid pEC867_KPC	Escherichia coli strain Ecol_867
1152340475	NZ_CP018982.1	Escherichia coli strain Ecol_867 plasmid pEC867_1	Escherichia coli strain Ecol_867
1152340712	NZ_CP018996.1	Escherichia coli strain Ecol_AZ153 plasmid pECAZ153_4	Escherichia coli strain Ecol_AZ153
1152340714	NZ_CP018997.1	Escherichia coli strain Ecol_AZ153 plasmid pECAZ153_3	Escherichia coli strain Ecol_AZ153
1152340716	NZ_CP018998.1	Escherichia coli strain Ecol_AZ153 plasmid pECAZ153_2	Escherichia coli strain Ecol_AZ153
1152340720	NZ_CP018999.1	Escherichia coli strain Ecol_AZ153 plasmid pECAZ153_KPC	Escherichia coli strain Ecol_AZ153
1152359276	NZ_CP018963.1	Escherichia coli strain Ecol_517 plasmid pEC517_KPC	Escherichia coli strain Ecol_517
1152359289	NZ_CP018964.1	Escherichia coli strain Ecol_517 plasmid pEC517_1	Escherichia coli strain Ecol_517
1152361828	NZ_CP018992.1	Escherichia coli strain Ecol_AZ147 plasmid pECAZ147_KPC	Escherichia coli strain Ecol_AZ147
1152361831	NZ_CP018993.1	Escherichia coli strain Ecol_AZ147 plasmid pECAZ147_2	Escherichia coli strain Ecol_AZ147
1152361835	NZ_CP018994.1	Escherichia coli strain Ecol_AZ147 plasmid pECAZ147_1	Escherichia coli strain Ecol_AZ147
1152362342	NZ_CP019006.1	Escherichia coli strain Ecol_AZ159 plasmid pECAZ159_2	Escherichia coli strain Ecol_AZ159
1152362343	NZ_CP019007.1	Escherichia coli strain Ecol_AZ159 plasmid pECAZ159_1	Escherichia coli strain Ecol_AZ159
1152363771	NZ_CP019013.1	Escherichia coli strain Ecol_AZ162 plasmid pECAZ162_2	Escherichia coli strain Ecol_AZ162
1152363772	NZ_CP019014.1	Escherichia coli strain Ecol_AZ162 plasmid pECAZ162_KPC	Escherichia coli strain Ecol_AZ162
1152364663	NZ_CP019016.1	Escherichia coli strain Ecol_244 plasmid pEC244_4	Escherichia coli strain Ecol_244
1152364664	NZ_CP019017.1	Escherichia coli strain Ecol_244 plasmid pEC244_KPC	Escherichia coli strain Ecol_244
1152364667	NZ_CP019018.1	Escherichia coli strain Ecol_244 plasmid pEC244_2	Escherichia coli strain Ecol_244
1152364677	NZ_CP019019.1	Escherichia coli strain Ecol_244 plasmid pEC244_1	Escherichia coli strain Ecol_244
1167590417	NZ_CP020059.1	Escherichia coli strain AR_0061 plasmid unitig_1	Escherichia coli strain AR_0061
1167590418	NZ_CP020060.1	Escherichia coli strain AR_0061 plasmid unitig_2	Escherichia coli strain AR_0061
1167593197	NZ_CP020049.1	Escherichia coli strain AR_0118 plasmid unitig_1	Escherichia coli strain AR_0118
1167593199	NZ_CP020050.1	Escherichia coli strain AR_0118 plasmid unitig_2	Escherichia coli strain AR_0118
1167593200	NZ_CP020051.1	Escherichia coli strain AR_0118 plasmid unitig_3	Escherichia coli strain AR_0118
1167593608	NZ_CP020056.1	Escherichia coli strain AR_0069 plasmid unitig_2	Escherichia coli strain AR_0069
1167593609	NZ_CP020057.1	Escherichia coli strain AR_0069 plasmid unitig_3	Escherichia coli strain AR_0069
1167593956	NZ_CP020117.1	Escherichia coli strain AR_0104 plasmid unitig_5	Escherichia coli strain AR_0104
1167593957	NZ_CP020118.1	Escherichia coli strain AR_0104 plasmid unitig_6	Escherichia coli strain AR_0104
1167593958	NZ_CP020119.1	Escherichia coli strain AR_0104 plasmid unitig_7	Escherichia coli strain AR_0104
1173321679	NZ_CP017221.1	Escherichia coli strain FAM21845 plasmid pFAM21845_1	Escherichia coli strain FAM21845
1173321713	NZ_CP017222.1	Escherichia coli strain FAM21845 plasmid pFAM21845_2	Escherichia coli strain FAM21845
1173321722	NZ_CP017223.1	Escherichia coli strain FAM21845 plasmid pFAM21845_3	Escherichia coli strain FAM21845
1173321725	NZ_CP017224.1	Escherichia coli strain FAM21845 plasmid pFAM21845_4	Escherichia coli strain FAM21845
1173321728	NZ_CP017225.1	Escherichia coli strain FAM21845 plasmid pFAM21845_5	Escherichia coli strain FAM21845
1186181983	NZ_CP020836.1	Escherichia coli strain CFSAN051542 plasmid pCFSAN051542	Escherichia coli strain CFSAN051542
1189285961	NZ_CP020934.1	Escherichia coli strain HB-Coli0 plasmid unnamed1	Escherichia coli strain HB-Coli0
1189286020	NZ_CP020936.1	Escherichia coli strain HB-Coli0 plasmid unnamed3	Escherichia coli strain HB-Coli0
1194615178	NZ_CP018771.2	Escherichia coli strain 2016C-3936C1 plasmid unnamed1	Escherichia coli strain 2016C-3936C1
1194615179	NZ_CP018773.2	Escherichia coli strain 2016C-3936C1 plasmid pMCR-1-CT	Escherichia coli strain 2016C-3936C1
1194615180	NZ_CP018774.2	Escherichia coli strain 2016C-3936C1 plasmid unnamed4	Escherichia coli strain 2016C-3936C1
1194615181	NZ_CP018775.2	Escherichia coli strain 2016C-3936C1 plasmid unnamed5	Escherichia coli strain 2016C-3936C1
1196453126	NZ_CP017981.1	Escherichia coli strain CH611_eco plasmid pGZ3_NDM5	Escherichia coli strain CH611_eco
1196917514	NZ_CP021203.1	Escherichia coli strain Z1002 plasmid p1002-1	Escherichia coli strain Z1002
1196917515	NZ_CP021204.1	Escherichia coli strain Z1002 plasmid p1002-4	Escherichia coli strain Z1002
1196917516	NZ_CP021205.1	Escherichia coli strain Z1002 plasmid p1002-MCR1	Escherichia coli strain Z1002
1196917517	NZ_CP021206.1	Escherichia coli strain Z1002 plasmid p1002-NDM1	Escherichia coli strain Z1002
1196918294	NZ_CP021208.1	Escherichia coli strain strain Z247 plasmid p2474-3	Escherichia coli strain strain Z247
1196918295	NZ_CP021209.1	Escherichia coli strain strain Z247 plasmid p2474-MCR1	Escherichia coli strain strain Z247
1196918296	NZ_CP021210.1	Escherichia coli strain strain Z247 plasmid p2474-NDM1	Escherichia coli strain strain Z247
1196918666	NZ_CP021176.1	Escherichia coli strain 5CRE51 plasmid p5CRE51-MCR-1	Escherichia coli strain 5CRE51
1196918667	NZ_CP021177.1	Escherichia coli strain 5CRE51 plasmid p5CRE51-NDM-9	Escherichia coli strain 5CRE51
1197984268	NZ_CP021336.1	Escherichia coli strain 95JB1 plasmid p95JB1A	Escherichia coli strain 95JB1
1197984269	NZ_CP021337.1	Escherichia coli strain 95JB1 plasmid p95JB1B	Escherichia coli strain 95JB1
1197984282	NZ_CP021340.1	Escherichia coli strain 95NR1 plasmid p95NR1A	Escherichia coli strain 95NR1
1197984283	NZ_CP021341.1	Escherichia coli strain 95NR1 plasmid p95NR1B	Escherichia coli strain 95NR1
1198243497	NZ_CP021180.1	Escherichia coli strain 81009 plasmid pEC-81009	Escherichia coli strain 81009
1200089615	NZ_CP019559.1	Escherichia coli strain KSC207 plasmid pMRGN207	Escherichia coli strain KSC207
1200110008	NZ_CP019561.1	Escherichia coli strain KSC1031 plasmid pMRGN1031	Escherichia coli strain KSC1031
1205035650	NZ_CP021536.1	Escherichia coli strain AR_0119 plasmid unitig_2	Escherichia coli strain AR_0119
1205035652	NZ_CP021537.1	Escherichia coli strain AR_0119 plasmid unitig_3	Escherichia coli strain AR_0119
1205035653	NZ_CP021538.1	Escherichia coli strain AR_0119 plasmid unitig_4	Escherichia coli strain AR_0119
1205035846	NZ_CP021690.1	Escherichia coli strain AR_0058 plasmid tig00007555j7554	Escherichia coli strain AR_0058
1205036740	NZ_CP021719.1	Escherichia coli strain AR_0128 plasmid tig00000792	Escherichia coli strain AR_0128
1205036741	NZ_CP021720.1	Escherichia coli strain AR_0128 plasmid tig00000793	Escherichia coli strain AR_0128
1205036742	NZ_CP021721.1	Escherichia coli strain AR_0128 plasmid tig00000856	Escherichia coli strain AR_0128
1205042815	NZ_CP021533.1	Escherichia coli strain AR_0149 plasmid tig00000220	Escherichia coli strain AR_0149
1205042816	NZ_CP021534.1	Escherichia coli strain AR_0149 plasmid tig00000221	Escherichia coli strain AR_0149
1205042854	NZ_CP021680.1	Escherichia coli strain AR_0162 plasmid tig00002623	Escherichia coli strain AR_0162
1205042855	NZ_CP021681.1	Escherichia coli strain AR_0162 plasmid tig00003056	Escherichia coli strain AR_0162
1205042856	NZ_CP021682.1	Escherichia coli strain AR_0162 plasmid tig00003144	Escherichia coli strain AR_0162
1205042858	NZ_CP021684.1	Escherichia coli strain AR_0162 plasmid tig00008015	Escherichia coli strain AR_0162
1205045912	NZ_CP021692.1	Escherichia coli strain AR_0151 plasmid tig00001251	Escherichia coli strain AR_0151
1205045913	NZ_CP021693.1	Escherichia coli strain AR_0151 plasmid tig00001252	Escherichia coli strain AR_0151
1207076443	NZ_CP021733.1	Escherichia coli strain AR_0114 plasmid unitig_1	Escherichia coli strain AR_0114
1207076444	NZ_CP021734.1	Escherichia coli strain AR_0114 plasmid unitig_2	Escherichia coli strain AR_0114
1207076445	NZ_CP021735.1	Escherichia coli strain AR_0114 plasmid unitig_4	Escherichia coli strain AR_0114
1207076536	NZ_CP021737.1	Escherichia coli strain AR_0150 plasmid tig00000255	Escherichia coli strain AR_0150
1207076537	NZ_CP021738.1	Escherichia coli strain AR_0150 plasmid tig00000260	Escherichia coli strain AR_0150
1207076538	NZ_CP021739.1	Escherichia coli strain AR_0150 plasmid tig00002897alt	Escherichia coli strain AR_0150
1208286777	NZ_CP021871.1	Escherichia coli strain H105 plasmid pH105	Escherichia coli strain H105
1208338564	NZ_CP021841.1	Escherichia coli strain EC974 plasmid pEC974-1	Escherichia coli strain EC974
1208338565	NZ_CP021842.1	Escherichia coli strain EC974 plasmid pEC974-2	Escherichia coli strain EC974
1208338566	NZ_CP021843.1	Escherichia coli strain EC974 plasmid pEC974-3	Escherichia coli strain EC974
1208345849	NZ_CP021845.1	Escherichia coli strain EC1515 plasmid pEC1515-1	Escherichia coli strain EC1515
1208345850	NZ_CP021846.1	Escherichia coli strain EC1515 plasmid pEC1515-2	Escherichia coli strain EC1515
1208345851	NZ_CP021847.1	Escherichia coli strain EC1515 plasmid pEC1515-3	Escherichia coli strain EC1515
1209192841	NZ_CP021936.1	Escherichia coli strain AR_0055 plasmid unitig_2	Escherichia coli strain AR_0055
1209192848	NZ_CP021937.1	Escherichia coli strain AR_0055 plasmid unitig_3j3rc_linear	Escherichia coli strain AR_0055
1209192862	NZ_CP021938.1	Escherichia coli strain AR_0055 plasmid unitig_4	Escherichia coli strain AR_0055
1209207381	NZ_CP021880.1	Escherichia coli strain AR_0137 plasmid tig00001069_pilon	Escherichia coli strain AR_0137
1209207382	NZ_CP021881.1	Escherichia coli strain AR_0137 plasmid tig00001145_pilon	Escherichia coli strain AR_0137
1209207383	NZ_CP021882.1	Escherichia coli strain AR_0137 plasmid tig00001287_pilon	Escherichia coli strain AR_0137
1214126608	NZ_CP022155.1	Escherichia coli strain ABWA45 plasmid pABWA45_1	Escherichia coli strain ABWA45
1214126609	NZ_CP022156.1	Escherichia coli strain ABWA45 plasmid pABWA45_2	Escherichia coli strain ABWA45
1214126610	NZ_CP022157.1	Escherichia coli strain ABWA45 plasmid pABWA45_3	Escherichia coli strain ABWA45
1214126611	NZ_CP022158.1	Escherichia coli strain ABWA45 plasmid pABWA45_4	Escherichia coli strain ABWA45
1214126612	NZ_CP022159.1	Escherichia coli strain ABWA45 plasmid pABWA45_5	Escherichia coli strain ABWA45
1214462577	NZ_CP022165.1	Escherichia coli strain M160133 plasmid pM160133_p1	Escherichia coli strain M160133
1214462578	NZ_CP022166.1	Escherichia coli strain M160133 plasmid pM160133_p2	Escherichia coli strain M160133
1214462583	NZ_CP022167.1	Escherichia coli strain M160133 plasmid pM160133_p3	Escherichia coli strain M160133
1214884546	NZ_CP011916.1	Escherichia coli strain PSUO2 plasmid pPSUO2	Escherichia coli strain PSUO2
1216894299	NZ_CP018625.1	Escherichia coli strain FORC_044 plasmid pFORC44_1	Escherichia coli strain FORC_044
1216894300	NZ_CP018626.1	Escherichia coli strain FORC_044 plasmid pFORC44_2	Escherichia coli strain FORC_044
1230813136	NZ_CP015844.2	Escherichia coli O157:H7 strain FRIK2455 plasmid pO157	Escherichia coli O157:H7 strain FRIK2455
1230813137	NZ_CP015845.2	Escherichia coli O157:H7 strain FRIK2455 plasmid p35K	Escherichia coli O157:H7 strain FRIK2455
1231812244	NZ_CP022688.1	Escherichia coli strain CDC#03-98 plasmid p0157	Escherichia coli strain CDC#03-98
1233114685	NZ_CP015847.2	Escherichia coli O157:H7 strain FRIK2069 plasmid p0157	Escherichia coli O157:H7 strain FRIK2069
1236882455	NZ_CP022913.1	Escherichia coli O6:H16 strain 2011EL-1370-2 plasmid unnamed1	Escherichia coli O6:H16 strain 2011EL-1370-2
1236882457	NZ_CP022914.1	Escherichia coli O6:H16 strain 2011EL-1370-2 plasmid unnamed2	Escherichia coli O6:H16 strain 2011EL-1370-2
1240331025	NZ_CP021289.1	Escherichia coli strain PA45B plasmid pPA45B	Escherichia coli strain PA45B
1240337571	NZ_CP023143.1	Escherichia coli strain CFSAN061770 plasmid pEGY1-MCR-1	Escherichia coli strain CFSAN061770
1240337572	NZ_CP023144.1	Escherichia coli strain CFSAN061770 plasmid pEGY2	Escherichia coli strain CFSAN061770
1240337573	NZ_CP023145.1	Escherichia coli strain CFSAN061770 plasmid pEGY3	Escherichia coli strain CFSAN061770
1243069029	NZ_CP023350.1	Escherichia coli strain ETEC-2264 plasmid unnamed1	Escherichia coli strain ETEC-2264
1243069050	NZ_CP023351.1	Escherichia coli strain ETEC-2264 plasmid unnamed2	Escherichia coli strain ETEC-2264
1243069070	NZ_CP023352.1	Escherichia coli strain ETEC-2264 plasmid unnamed3	Escherichia coli strain ETEC-2264
1243099708	NZ_CP023347.1	Escherichia coli strain ETEC-2265 plasmid unnamed1	Escherichia coli strain ETEC-2265
1243099709	NZ_CP023348.1	Escherichia coli strain ETEC-2265 plasmid unnamed2	Escherichia coli strain ETEC-2265
1243941742	NZ_CP023360.1	Escherichia coli strain 1943 plasmid p54	Escherichia coli strain 1943
1243941743	NZ_CP023361.1	Escherichia coli strain 1943 plasmid p80	Escherichia coli strain 1943
1243941744	NZ_CP023362.1	Escherichia coli strain 1943 plasmid p85	Escherichia coli strain 1943
1243941828	NZ_CP023354.1	Escherichia coli strain 746 plasmid p62	Escherichia coli strain 746
1243941829	NZ_CP023355.1	Escherichia coli strain 746 plasmid p72	Escherichia coli strain 746
1243941830	NZ_CP023356.1	Escherichia coli strain 746 plasmid p95	Escherichia coli strain 746
1243944344	NZ_CP023358.1	Escherichia coli strain 317 plasmid p100	Escherichia coli strain 317
1243944668	NZ_CP023378.1	Escherichia coli strain 127 plasmid p123	Escherichia coli strain 127
1243944669	NZ_CP023379.1	Escherichia coli strain 127 plasmid p39	Escherichia coli strain 127
1243944670	NZ_CP023380.1	Escherichia coli strain 127 plasmid p43	Escherichia coli strain 127
1243944671	NZ_CP023381.1	Escherichia coli strain 127 plasmid p91	Escherichia coli strain 127
1243944672	NZ_CP023382.1	Escherichia coli strain 127 plasmid p95	Escherichia coli strain 127
1243947315	NZ_CP023363.1	Escherichia coli strain 144 plasmid 134q	Escherichia coli strain 144
1243947317	NZ_CP023365.1	Escherichia coli strain 144 plasmid p92	Escherichia coli strain 144
1243947434	NZ_CP023367.1	Escherichia coli strain 1428 plasmid p111	Escherichia coli strain 1428
1243947435	NZ_CP023368.1	Escherichia coli strain 1428 plasmid p48	Escherichia coli strain 1428
1243947436	NZ_CP023369.1	Escherichia coli strain 1428 plasmid p66	Escherichia coli strain 1428
1243947437	NZ_CP023370.1	Escherichia coli strain 1428 plasmid p96	Escherichia coli strain 1428
1243947460	NZ_CP023384.1	Escherichia coli strain 1223 plasmid p147	Escherichia coli strain 1223
1243947461	NZ_CP023385.1	Escherichia coli strain 1223 plasmid p87	Escherichia coli strain 1223
1243964607	NZ_CP023387.1	Escherichia coli strain 1190 plasmid p86	Escherichia coli strain 1190
1243964678	NZ_CP023389.1	Escherichia coli strain 1105 plasmid p74	Escherichia coli strain 1105
1243964707	NZ_CP023372.1	Escherichia coli strain 1283 plasmid p109	Escherichia coli strain 1283
1243964708	NZ_CP023373.1	Escherichia coli strain 1283 plasmid p31	Escherichia coli strain 1283
1243964709	NZ_CP023374.1	Escherichia coli strain 1283 plasmid p3	Escherichia coli strain 1283
1243964710	NZ_CP023375.1	Escherichia coli strain 1283 plasmid p7	Escherichia coli strain 1283
1243964711	NZ_CP023376.1	Escherichia coli strain 1283 plasmid p92	Escherichia coli strain 1283
1248547156	NZ_CP023530.1	Escherichia coli strain FDAARGOS_401 plasmid unnamed	Escherichia coli strain FDAARGOS_401
1248647313	NZ_CP023532.1	Escherichia coli strain FDAARGOS_403 plasmid unnamed3	Escherichia coli strain FDAARGOS_403
1248647314	NZ_CP023533.1	Escherichia coli strain FDAARGOS_403 plasmid unnamed2	Escherichia coli strain FDAARGOS_403
1248647315	NZ_CP023534.1	Escherichia coli strain FDAARGOS_403 plasmid unnamed1	Escherichia coli strain FDAARGOS_403
1249963244	NZ_CP023542.1	Escherichia coli O104:H21 str. CFSAN002236 strain ATCC BAA-178 plasmid pO104_H21	Escherichia coli O104:H21 str. CFSAN002236 strain ATCC BAA-178
1268648197	NZ_CP023816.1	Escherichia coli strain IMT16316 plasmid pEcIMT16316	Escherichia coli strain IMT16316
1268720944	NZ_CP023957.1	Escherichia coli strain FDAARGOS_448 plasmid unnamed3	Escherichia coli strain FDAARGOS_448
1268720945	NZ_CP023958.1	Escherichia coli strain FDAARGOS_448 plasmid unnamed4	Escherichia coli strain FDAARGOS_448
1268720946	NZ_CP023959.1	Escherichia coli strain FDAARGOS_448 plasmid unnamed1	Escherichia coli strain FDAARGOS_448
1268720948	NZ_CP023961.1	Escherichia coli strain FDAARGOS_448 plasmid unnamed2	Escherichia coli strain FDAARGOS_448
1268729360	NZ_CP023895.1	Escherichia coli strain FDAARGOS_433 plasmid unnamed2	Escherichia coli strain FDAARGOS_433
1268729361	NZ_CP023896.1	Escherichia coli strain FDAARGOS_433 plasmid unnamed3	Escherichia coli strain FDAARGOS_433
1268729362	NZ_CP023897.1	Escherichia coli strain FDAARGOS_433 plasmid unnamed4	Escherichia coli strain FDAARGOS_433
1268729363	NZ_CP023898.1	Escherichia coli strain FDAARGOS_433 plasmid unnamed7	Escherichia coli strain FDAARGOS_433
1268729367	NZ_CP023900.1	Escherichia coli strain FDAARGOS_433 plasmid unnamed6	Escherichia coli strain FDAARGOS_433
1268729368	NZ_CP023901.1	Escherichia coli strain FDAARGOS_433 plasmid unnamed10	Escherichia coli strain FDAARGOS_433
1268729369	NZ_CP023902.1	Escherichia coli strain FDAARGOS_433 plasmid unnamed9	Escherichia coli strain FDAARGOS_433
1268729370	NZ_CP023903.1	Escherichia coli strain FDAARGOS_433 plasmid unnamed1	Escherichia coli strain FDAARGOS_433
1268729371	NZ_CP023904.1	Escherichia coli strain FDAARGOS_433 plasmid unnamed8	Escherichia coli strain FDAARGOS_433
1268729372	NZ_CP023905.1	Escherichia coli strain FDAARGOS_433 plasmid unnamed5	Escherichia coli strain FDAARGOS_433
1269685434	NZ_CP023871.1	Escherichia coli strain FDAARGOS_434 plasmid unnamed1	Escherichia coli strain FDAARGOS_434
1271416808	NZ_CP015245.1	Escherichia coli O91 str. RM7190 plasmid pRM7190-1	Escherichia coli O91 str. RM7190
1271416818	NZ_CP015246.1	Escherichia coli O91 str. RM7190 plasmid pRM7190-2	Escherichia coli O91 str. RM7190
1279557839	NZ_CP023552.1	Escherichia coli strain FORC_043 plasmid pFORC43	Escherichia coli strain FORC_043
1316666019	NZ_CP022408.1	Escherichia coli O121:H19 strain 16-9255 plasmid punamed1	Escherichia coli O121:H19 strain 16-9255
1326141590	NZ_CP024142.1	Escherichia coli strain 14EC029 plasmid p14EC029a	Escherichia coli strain 14EC029
1326141591	NZ_CP024143.1	Escherichia coli strain 14EC029 plasmid p14EC029b	Escherichia coli strain 14EC029
1326191422	NZ_CP024132.1	Escherichia coli strain 14EC007 plasmid p14EC007a	Escherichia coli strain 14EC007
1326191423	NZ_CP024133.1	Escherichia coli strain 14EC007 plasmid p14EC007b	Escherichia coli strain 14EC007
1326191471	NZ_CP019052.1	Escherichia coli strain CRE1540 plasmid p1540-1	Escherichia coli strain CRE1540
1326191472	NZ_CP019053.1	Escherichia coli strain CRE1540 plasmid p1540-2	Escherichia coli strain CRE1540
1326191473	NZ_CP019054.1	Escherichia coli strain CRE1540 plasmid p1540-3	Escherichia coli strain CRE1540
1326191474	NZ_CP019055.1	Escherichia coli strain CRE1540 plasmid p1540-4	Escherichia coli strain CRE1540
1326191793	NZ_CP019072.1	Escherichia coli strain CRE1493 plasmid p1493-1	Escherichia coli strain CRE1493
1326191794	NZ_CP019073.1	Escherichia coli strain CRE1493 plasmid p1493-2	Escherichia coli strain CRE1493
1326191795	NZ_CP019074.1	Escherichia coli strain CRE1493 plasmid p1493-3	Escherichia coli strain CRE1493
1326191796	NZ_CP019075.1	Escherichia coli strain CRE1493 plasmid p1493-4	Escherichia coli strain CRE1493
1326191797	NZ_CP019076.1	Escherichia coli strain CRE1493 plasmid p1493-5	Escherichia coli strain CRE1493
1326192486	NZ_CP022280.1	Escherichia coli strain STEC299 plasmid pSTEC299_1	Escherichia coli strain STEC299
1326192487	NZ_CP022281.1	Escherichia coli strain STEC299 plasmid pSTEC299_2	Escherichia coli strain STEC299
1326192645	NZ_CP023674.1	Escherichia coli strain SMN013SH2 plasmid pO177A2	Escherichia coli strain SMN013SH2
1326192646	NZ_CP023675.1	Escherichia coli strain SMN013SH2 plasmid pO177B2	Escherichia coli strain SMN013SH2
1326194383	NZ_CP024053.1	Escherichia coli strain SMN197SH3 plasmid pO177C3	Escherichia coli strain SMN197SH3
1326194384	NZ_CP024054.1	Escherichia coli strain SMN197SH3 plasmid pO177B3	Escherichia coli strain SMN197SH3
1326194385	NZ_CP024055.1	Escherichia coli strain SMN197SH3 plasmid pO177A3	Escherichia coli strain SMN197SH3
1327401394	NZ_CP024135.1	Escherichia coli strain 14EC017 plasmid p14EC017a	Escherichia coli strain 14EC017
1327401395	NZ_CP024136.1	Escherichia coli strain 14EC017 plasmid p14EC017b	Escherichia coli strain 14EC017
1327401396	NZ_CP024137.1	Escherichia coli strain 14EC017 plasmid p14EC017c	Escherichia coli strain 14EC017
1327404055	NZ_CP024139.1	Escherichia coli strain 14EC020 plasmid p14EC020a	Escherichia coli strain 14EC020
1327404056	NZ_CP024140.1	Escherichia coli strain 14EC020 plasmid p14EC020b	Escherichia coli strain 14EC020
1327446320	NZ_CP024128.1	Escherichia coli strain 14EC001 plasmid p14EC001a	Escherichia coli strain 14EC001
1327446321	NZ_CP024129.1	Escherichia coli strain 14EC001 plasmid p14EC001b	Escherichia coli strain 14EC001
1327446322	NZ_CP024130.1	Escherichia coli strain 14EC001 plasmid p14EC001c	Escherichia coli strain 14EC001
1327721192	NZ_CP022729.1	Escherichia coli O157:H7 strain FRIK2533 plasmid p35K	Escherichia coli O157:H7 strain FRIK2533
1344168830	NZ_CP015086.1	Escherichia coli O25b:H4 plasmid unnamed	Escherichia coli O25b:H4
1352585576	NZ_CP014109.1	Escherichia coli strain FDAARGOS_144 plasmid unnamed3	Escherichia coli strain FDAARGOS_144
1352585577	NZ_CP014110.1	Escherichia coli strain FDAARGOS_144 plasmid unnamed1	Escherichia coli strain FDAARGOS_144
1352585739	NZ_CP014112.1	Escherichia coli strain FDAARGOS_144 plasmid unnamed2	Escherichia coli strain FDAARGOS_144
1353425538	NZ_CP019456.1	Escherichia coli strain FHI_NMBU_03 plasmid pFHI_NMBU_03_1	Escherichia coli strain FHI_NMBU_03
1358826599	NZ_CP022051.2	Escherichia coli O157 strain FDAARGOS_293 plasmid unnamed1	Escherichia coli O157 strain FDAARGOS_293
1358826613	NZ_CP022052.2	Escherichia coli O157 strain FDAARGOS_293 plasmid unnamed2	Escherichia coli O157 strain FDAARGOS_293
1371853957	NZ_CP022085.2	Escherichia coli O104:H4 strain FDAARGOS_348 plasmid unnamed1	Escherichia coli O104:H4 strain FDAARGOS_348
1371854032	NZ_CP022087.2	Escherichia coli O104:H4 strain FDAARGOS_348 plasmid unnamed2	Escherichia coli O104:H4 strain FDAARGOS_348
1388897896	NZ_CP019215.2	Escherichia coli strain WCHEC050613 plasmid pI_050613	Escherichia coli strain WCHEC050613
1395189395	NZ_CP013186.1	Escherichia coli strain FORC_029 plasmid FORC_029p	Escherichia coli strain FORC_029
1398179015	NZ_CP023259.1	Escherichia coli strain CCUG 70745 plasmid pEco70745_1	Escherichia coli strain CCUG 70745
1398179027	NZ_CP023260.1	Escherichia coli strain CCUG 70745 plasmid pEco70745_2	Escherichia coli strain CCUG 70745
1398179032	NZ_CP023261.1	Escherichia coli strain CCUG 70745 plasmid pEco70745_3	Escherichia coli strain CCUG 70745
1398179036	NZ_CP023262.1	Escherichia coli strain CCUG 70745 plasmid pEco70745_4	Escherichia coli strain CCUG 70745
1398179039	NZ_CP023263.1	Escherichia coli strain CCUG 70745 plasmid pEco70745_5	Escherichia coli strain CCUG 70745
1398179042	NZ_CP023264.1	Escherichia coli strain CCUG 70745 plasmid pEco70745_6	Escherichia coli strain CCUG 70745
1441357132	NZ_CP023732.1	Escherichia coli strain FORC 064 plasmid pFORC64.1	Escherichia coli strain FORC 064
1441357133	NZ_CP023733.1	Escherichia coli strain FORC 064 plasmid pFORC64.2	Escherichia coli strain FORC 064
1441357134	NZ_CP023734.1	Escherichia coli strain FORC 064 plasmid pFORC64.3	Escherichia coli strain FORC 064
1467811330	NZ_CP022226.2	Escherichia coli strain WCHEC96200 plasmid pNDM4_WCHEC96200	Escherichia coli strain WCHEC96200
1475515498	NZ_CP023062.1	Escherichia coli strain FORC_069 plasmid pFORC69	Escherichia coli strain FORC_069
1477081585	NZ_CP022687.1	Escherichia coli Nissle 1917 plasmid pNissle1	Escherichia coli Nissle 1917
1477081586	NZ_CP023342.1	Escherichia coli Nissle 1917 plasmid pMUT2	Escherichia coli Nissle 1917
1528169524	NZ_CP023835.1	Escherichia coli strain 4/2-1 plasmid p4_2_1.1	Escherichia coli strain 4/2-1
1528169560	NZ_CP023836.1	Escherichia coli strain 4/2-1 plasmid p4_2_1.2	Escherichia coli strain 4/2-1
1528169570	NZ_CP023837.1	Escherichia coli strain 4/2-1 plasmid p4_2_1.3	Escherichia coli strain 4/2-1
1528169574	NZ_CP023838.1	Escherichia coli strain 4/2-1 plasmid p4_2_1.4	Escherichia coli strain 4/2-1
1528172768	NZ_CP023821.1	Escherichia coli strain 7/2 plasmid p7_2.1	Escherichia coli strain 7/2
1528172827	NZ_CP023822.1	Escherichia coli strain 7/2 plasmid p7_2.2	Escherichia coli strain 7/2
1528172843	NZ_CP023823.1	Escherichia coli strain 7/2 plasmid p7_2.3	Escherichia coli strain 7/2
1528172868	NZ_CP023824.1	Escherichia coli strain 7/2 plasmid p7_2.4	Escherichia coli strain 7/2
1528172876	NZ_CP023825.1	Escherichia coli strain 7/2 plasmid p7_2.5	Escherichia coli strain 7/2
1528301689	NZ_CP023827.1	Escherichia coli strain 4/4 plasmid p4_4.1	Escherichia coli strain 4/4
1528301712	NZ_CP023828.1	Escherichia coli strain 4/4 plasmid p4_4.2	Escherichia coli strain 4/4
1528301726	NZ_CP023829.1	Escherichia coli strain 4/4 plasmid p4_4.3	Escherichia coli strain 4/4
1528301733	NZ_CP023830.1	Escherichia coli strain 4/4 plasmid p4_4.4	Escherichia coli strain 4/4
1528301740	NZ_CP023831.1	Escherichia coli strain 4/4 plasmid p4_4.5	Escherichia coli strain 4/4
1528301745	NZ_CP023832.1	Escherichia coli strain 4/4 plasmid p4_4.6	Escherichia coli strain 4/4
1528301751	NZ_CP023833.1	Escherichia coli strain 4/4 plasmid p4_4.7	Escherichia coli strain 4/4
1528318078	NZ_CP023850.1	Escherichia coli strain 4/0 plasmid p4_0.1	Escherichia coli strain 4/0
1528318099	NZ_CP023851.1	Escherichia coli strain 4/0 plasmid p4_0.2	Escherichia coli strain 4/0
1528318114	NZ_CP023852.1	Escherichia coli strain 4/0 plasmid p4_0.3	Escherichia coli strain 4/0
1528323207	NZ_CP023854.1	Escherichia coli strain 2/0 plasmid p2_0.1	Escherichia coli strain 2/0
1528323219	NZ_CP023855.1	Escherichia coli strain 2/0 plasmid p2_0.2	Escherichia coli strain 2/0
1528323222	NZ_CP023856.1	Escherichia coli strain 2/0 plasmid p2_0.3	Escherichia coli strain 2/0
1528323224	NZ_CP023857.1	Escherichia coli strain 2/0 plasmid p2_0.4	Escherichia coli strain 2/0
1528323226	NZ_CP023858.1	Escherichia coli strain 2/0 plasmid p2_0.5	Escherichia coli strain 2/0
1528415716	NZ_CP023845.1	Escherichia coli strain 4/1-1 plasmid p4_1_1.1	Escherichia coli strain 4/1-1
1528415730	NZ_CP023846.1	Escherichia coli strain 4/1-1 plasmid p4_1_1.2	Escherichia coli strain 4/1-1
1528415733	NZ_CP023847.1	Escherichia coli strain 4/1-1 plasmid p4_1_1.3	Escherichia coli strain 4/1-1
1528415736	NZ_CP023848.1	Escherichia coli strain 4/1-1 plasmid p4_1_1.4	Escherichia coli strain 4/1-1
1569286164	NZ_CP019954.1	Escherichia coli M8 plasmid unnamed1	Escherichia coli M8
1569286165	NZ_CP019955.1	Escherichia coli M8 plasmid unnamed2	Escherichia coli M8
1569286166	NZ_CP019956.1	Escherichia coli M8 plasmid unnamed3	Escherichia coli M8
1569291897	NZ_CP022731.1	Escherichia coli strain SA186 plasmid pSA186_2	Escherichia coli strain SA186
1569291898	NZ_CP022732.1	Escherichia coli strain SA186 plasmid pSA186_3	Escherichia coli strain SA186
1569291899	NZ_CP022733.1	Escherichia coli strain SA186 plasmid pSA186_4	Escherichia coli strain SA186
1569291900	NZ_CP022734.1	Escherichia coli strain SA186 plasmid pSA186_5	Escherichia coli strain SA186
1569291901	NZ_CP022735.1	Escherichia coli strain SA186 plasmid pSA186_MCR1	Escherichia coli strain SA186
1606762855	NZ_CP021194.1	Escherichia coli strain H17 plasmid pH17-1	Escherichia coli strain H17
1606762856	NZ_CP021195.1	Escherichia coli strain H17 plasmid pH17-2	Escherichia coli strain H17
1606762857	NZ_CP021196.1	Escherichia coli strain H17 plasmid pH17-3	Escherichia coli strain H17
1606762858	NZ_CP021197.1	Escherichia coli strain H17 plasmid pH17-4	Escherichia coli strain H17
1606762859	NZ_CP021198.1	Escherichia coli strain H17 plasmid pH17-5	Escherichia coli strain H17
1607063206	NZ_CP020496.1	Escherichia coli strain 103 plasmid unnamed1	Escherichia coli strain 103
1607063207	NZ_CP020497.1	Escherichia coli strain 103 plasmid unnamed2	Escherichia coli strain 103
1707025264	NZ_CP015854.1	Escherichia coli strain ATCC 43889 plasmid unnamed	Escherichia coli strain ATCC 43889
1729615283	NZ_CP019246.1	Escherichia coli strain Combat13F7 plasmid pCombat13F7-1	Escherichia coli strain Combat13F7
1729615286	NZ_CP019247.1	Escherichia coli strain Combat13F7 plasmid pCombat13F7-2	Escherichia coli strain Combat13F7
1729615287	NZ_CP019248.1	Escherichia coli strain Combat13F7 plasmid pCombat13F7-3	Escherichia coli strain Combat13F7
1729615288	NZ_CP019249.1	Escherichia coli strain Combat13F7 plasmid pCombat13F7-4	Escherichia coli strain Combat13F7
1729615420	NZ_CP019268.1	Escherichia coli strain 13C1079T plasmid p13C1079T-1	Escherichia coli strain 13C1079T
1729615421	NZ_CP019269.1	Escherichia coli strain 13C1079T plasmid p13C1079T-2	Escherichia coli strain 13C1079T
1729615422	NZ_CP019270.1	Escherichia coli strain 13C1079T plasmid p13C1079T-3	Escherichia coli strain 13C1079T
1729615495	NZ_CP020515.1	Escherichia coli strain 219 plasmid unnamed	Escherichia coli strain 219
1729615782	NZ_CP019260.1	Escherichia coli strain 13C1065T plasmid p13C1065T-1	Escherichia coli strain 13C1065T
1729615783	NZ_CP019261.1	Escherichia coli strain 13C1065T plasmid p13C1065T-2	Escherichia coli strain 13C1065T
1729615784	NZ_CP019262.1	Escherichia coli strain 13C1065T plasmid p13C1065T-3	Escherichia coli strain 13C1065T
1729615785	NZ_CP019263.1	Escherichia coli strain 13C1065T plasmid p13C1065T-4	Escherichia coli strain 13C1065T
1729615786	NZ_CP019264.1	Escherichia coli strain 13C1065T plasmid p13C1065T-5	Escherichia coli strain 13C1065T
1729615787	NZ_CP019265.1	Escherichia coli strain 13C1065T plasmid p13C1065T-6	Escherichia coli strain 13C1065T
1729615788	NZ_CP019266.1	Escherichia coli strain 13C1065T plasmid p13C1065T-7	Escherichia coli strain 13C1065T
1729616074	NZ_CP019244.1	Escherichia coli strain Combat2C1 plasmid pCombat2C1-1	Escherichia coli strain Combat2C1
1729616403	NZ_CP019251.1	Escherichia coli strain 13KWH46 plasmid p13KWH46-1	Escherichia coli strain 13KWH46
1729616421	NZ_CP019252.1	Escherichia coli strain 13KWH46 plasmid p13KWH46-2	Escherichia coli strain 13KWH46
1729616452	NZ_CP019253.1	Escherichia coli strain 13KWH46 plasmid p13KWH46-3	Escherichia coli strain 13KWH46
1729616475	NZ_CP019254.1	Escherichia coli strain 13KWH46 plasmid p13KWH46-4	Escherichia coli strain 13KWH46
1729616484	NZ_CP019255.1	Escherichia coli strain 13KWH46 plasmid p13KWH46-5	Escherichia coli strain 13KWH46
1729618875	NZ_CP021727.1	Escherichia coli strain Combat11I9 plasmid pCombat11I9-1	Escherichia coli strain Combat11I9
1729618876	NZ_CP021728.1	Escherichia coli strain Combat11I9 plasmid pCombat11I9-2	Escherichia coli strain Combat11I9
1729618877	NZ_CP021729.1	Escherichia coli strain Combat11I9 plasmid pCombat11I9-3	Escherichia coli strain Combat11I9
1729618878	NZ_CP021730.1	Escherichia coli strain Combat11I9 plasmid pCombat11I9-4	Escherichia coli strain Combat11I9
1729618991	NZ_CP020517.1	Escherichia coli strain 222 plasmid unnamed3	Escherichia coli strain 222
1729618992	NZ_CP020518.1	Escherichia coli strain 222 plasmid unnamed2	Escherichia coli strain 222
1729618993	NZ_CP020519.1	Escherichia coli strain 222 plasmid unnamed1	Escherichia coli strain 222
1729618995	NZ_CP019274.1	Escherichia coli strain 13P477T plasmid p13P477T-1	Escherichia coli strain 13P477T
1729618996	NZ_CP019275.1	Escherichia coli strain 13P477T plasmid p13P477T-2	Escherichia coli strain 13P477T
1729618997	NZ_CP019276.1	Escherichia coli strain 13P477T plasmid p13P477T-3	Escherichia coli strain 13P477T
1729618998	NZ_CP019277.1	Escherichia coli strain 13P477T plasmid p13P477T-4	Escherichia coli strain 13P477T
1729618999	NZ_CP019278.1	Escherichia coli strain 13P477T plasmid p13P477T-5	Escherichia coli strain 13P477T
1729619000	NZ_CP019279.1	Escherichia coli strain 13P477T plasmid p13P477T-6	Escherichia coli strain 13P477T
1729619001	NZ_CP021099.1	Escherichia coli strain 13P477T plasmid p13P477T-11	Escherichia coli strain 13P477T
1729619002	NZ_CP021100.1	Escherichia coli strain 13P477T plasmid p13P477T-10	Escherichia coli strain 13P477T
1729619003	NZ_CP021101.1	Escherichia coli strain 13P477T plasmid p13P477T-9	Escherichia coli strain 13P477T
1729619004	NZ_CP021102.1	Escherichia coli strain 13P477T plasmid p13P477T-8	Escherichia coli strain 13P477T
1729619005	NZ_CP021103.1	Escherichia coli strain 13P477T plasmid p13P477T-7	Escherichia coli strain 13P477T
1729619209	NZ_CP020521.1	Escherichia coli strain 190 plasmid unnamed4	Escherichia coli strain 190
1729619210	NZ_CP020522.1	Escherichia coli strain 190 plasmid unnamed3	Escherichia coli strain 190
1729619211	NZ_CP020523.1	Escherichia coli strain 190 plasmid unnamed2	Escherichia coli strain 190
1729619212	NZ_CP019281.1	Escherichia coli strain 13P484A plasmid p13P484A-1	Escherichia coli strain 13P484A
1729619213	NZ_CP019282.1	Escherichia coli strain 13P484A plasmid p13P484A-2	Escherichia coli strain 13P484A
1729619214	NZ_CP020524.1	Escherichia coli strain 190 plasmid unnamed1	Escherichia coli strain 190
1729619215	NZ_CP019283.1	Escherichia coli strain 13P484A plasmid p13P484A-3	Escherichia coli strain 13P484A
1729619216	NZ_CP019284.1	Escherichia coli strain 13P484A plasmid p13P484A-4	Escherichia coli strain 13P484A
1729622343	NZ_CP020510.1	Escherichia coli strain 165 plasmid unnamed1	Escherichia coli strain 165
1729622344	NZ_CP020511.1	Escherichia coli strain 165 plasmid unnamed2	Escherichia coli strain 165
1729622345	NZ_CP020512.1	Escherichia coli strain 165 plasmid unnamed3	Escherichia coli strain 165
1729622346	NZ_CP020513.1	Escherichia coli strain 165 plasmid unnamed4	Escherichia coli strain 165
1729623366	NZ_CP020546.1	Escherichia coli strain ZJ3920 plasmid pZJ3920-1	Escherichia coli strain ZJ3920
1729623367	NZ_CP020547.1	Escherichia coli strain ZJ3920 plasmid pZJ3920-2	Escherichia coli strain ZJ3920
1729623368	NZ_CP020548.1	Escherichia coli strain ZJ3920 plasmid pZJ3920-3	Escherichia coli strain ZJ3920
1729623677	NZ_CP019257.1	Escherichia coli strain 13TMH22 plasmid p13TMH22-1	Escherichia coli strain 13TMH22
1729623688	NZ_CP019258.1	Escherichia coli strain 13TMH22 plasmid p13TMH22-2	Escherichia coli strain 13TMH22
1729624915	NZ_CP019272.1	Escherichia coli strain 13P460A plasmid p13P460A-1	Escherichia coli strain 13P460A
1729624921	NZ_CP021087.1	Escherichia coli strain 13P460A plasmid p13P460A-2	Escherichia coli strain 13P460A
1729850285	NZ_CP019214.3	Escherichia coli strain WCHEC050613 plasmid pMCR_WCHEC050613	Escherichia coli strain WCHEC050613
1729850294	NZ_CP019216.3	Escherichia coli strain WCHEC050613 plasmid p2_050613	Escherichia coli strain WCHEC050613
1729850750	NZ_CP022227.3	Escherichia coli strain WCHEC96200 plasmid pCTXM15_000200	Escherichia coli strain WCHEC96200
1729850751	NZ_CP022228.3	Escherichia coli strain WCHEC96200 plasmid p1_000200	Escherichia coli strain WCHEC96200
1736667027	NZ_CP012377.1	Escherichia coli strain GE3 isolate human faeces plasmid pGE3	Escherichia coli strain GE3
1780354764	NZ_CP023164.1	Escherichia coli O22:H8 strain RM10809-3 plasmid pRM10809-3	Escherichia coli O22:H8 strain RM10809-3
1960877811	NZ_CP019356.1	Escherichia coli strain XH990 plasmid pXH990_1	Escherichia coli strain XH990
1960877812	NZ_CP019357.1	Escherichia coli strain XH990 plasmid pXH990_2	Escherichia coli strain XH990
1960877813	NZ_CP019358.1	Escherichia coli strain XH990 plasmid pXH990_3	Escherichia coli strain XH990
1980839808	NZ_CP019393.1	Escherichia coli strain XH992 plasmid pXH992_3	Escherichia coli strain XH992
1980839877	NZ_CP019394.1	Escherichia coli strain XH992 plasmid pXH992_1	Escherichia coli strain XH992
1980839925	NZ_CP019395.1	Escherichia coli strain XH992 plasmid pXH992_2	Escherichia coli strain XH992
1981169211	NZ_CP019353.1	Escherichia coli strain XH988 plasmid pXH988_1	Escherichia coli strain XH988
1981169214	NZ_CP019354.1	Escherichia coli strain XH988 plasmid pXH988_2	Escherichia coli strain XH988
1981178491	NZ_CP019360.1	Escherichia coli strain XH993 plasmid pXH993	Escherichia coli strain XH993
2023664519	NZ_CP012497.1	Escherichia coli strain 06-00048 isolate CFSAN004178 plasmid pCFSAN004178P_01	Escherichia coli strain 06-00048
1274285556	NZ_CP024294.1	Escherichia coli strain 00-3279 plasmid unnamed1	Escherichia coli strain 00-3279
1274285557	NZ_CP024295.1	Escherichia coli strain 00-3279 plasmid unnamed2	Escherichia coli strain 00-3279
1274285558	NZ_CP024296.1	Escherichia coli strain 00-3279 plasmid unnamed3	Escherichia coli strain 00-3279
1274288114	NZ_CP024241.1	Escherichia coli O114:H49 strain 90-9280 plasmid unnamed1	Escherichia coli O114:H49 strain 90-9280
1274288155	NZ_CP024242.1	Escherichia coli O114:H49 strain 90-9280 plasmid unnamed2	Escherichia coli O114:H49 strain 90-9280
1274291050	NZ_CP024279.1	Escherichia coli strain ATCC 43896 plasmid unnamed1	Escherichia coli strain ATCC 43896
1274291056	NZ_CP024280.1	Escherichia coli strain ATCC 43896 plasmid unnamed2	Escherichia coli strain ATCC 43896
1274291090	NZ_CP024281.1	Escherichia coli strain ATCC 43896 plasmid unnamed3	Escherichia coli strain ATCC 43896
1274295765	NZ_CP024224.1	Escherichia coli O169:H41 strain 2014EL-1345-2 plasmid unnamed1	Escherichia coli O169:H41 strain 2014EL-1345-2
1274295766	NZ_CP024225.1	Escherichia coli O169:H41 strain 2014EL-1345-2 plasmid unnamed2	Escherichia coli O169:H41 strain 2014EL-1345-2
1274295767	NZ_CP024226.1	Escherichia coli O169:H41 strain 2014EL-1345-2 plasmid unnamed3	Escherichia coli O169:H41 strain 2014EL-1345-2
1274295768	NZ_CP024227.1	Escherichia coli O169:H41 strain 2014EL-1345-2 plasmid unnamed4	Escherichia coli O169:H41 strain 2014EL-1345-2
1274298085	NZ_CP024270.1	Escherichia coli strain F8111-1SC3 plasmid unnamed1	Escherichia coli strain F8111-1SC3
1274298120	NZ_CP024271.1	Escherichia coli strain F8111-1SC3 plasmid unnamed2	Escherichia coli strain F8111-1SC3
1274298156	NZ_CP024272.1	Escherichia coli strain F8111-1SC3 plasmid unnamed3	Escherichia coli strain F8111-1SC3
1274328925	NZ_CP024297.1	Escherichia coli strain 90-9276 plasmid unnamed1	Escherichia coli strain 90-9276
1274328926	NZ_CP024298.1	Escherichia coli strain 90-9276 plasmid unnamed2	Escherichia coli strain 90-9276
1274332447	NZ_CP024261.1	Escherichia coli strain F5656C1 plasmid unnamed1	Escherichia coli strain F5656C1
1274332470	NZ_CP024262.1	Escherichia coli strain F5656C1 plasmid unnamed2	Escherichia coli strain F5656C1
1274335777	NZ_CP024290.1	Escherichia coli O178:H19 strain 2012C-4431 plasmid unnamed1	Escherichia coli O178:H19 strain 2012C-4431
1274335778	NZ_CP024291.1	Escherichia coli O178:H19 strain 2012C-4431 plasmid unnamed2	Escherichia coli O178:H19 strain 2012C-4431
1274335779	NZ_CP024292.1	Escherichia coli O178:H19 strain 2012C-4431 plasmid unnamed3	Escherichia coli O178:H19 strain 2012C-4431
1274358822	NZ_CP024233.1	Escherichia coli O6:H16 strain 2014EL-1346-6 plasmid unnamed1	Escherichia coli O6:H16 strain 2014EL-1346-6
1274358834	NZ_CP024234.1	Escherichia coli O6:H16 strain 2014EL-1346-6 plasmid unnamed2	Escherichia coli O6:H16 strain 2014EL-1346-6
1274358846	NZ_CP024235.1	Escherichia coli O6:H16 strain 2014EL-1346-6 plasmid unnamed3	Escherichia coli O6:H16 strain 2014EL-1346-6
1274358888	NZ_CP024236.1	Escherichia coli O6:H16 strain 2014EL-1346-6 plasmid unnamed4	Escherichia coli O6:H16 strain 2014EL-1346-6
1274358943	NZ_CP024237.1	Escherichia coli O6:H16 strain 2014EL-1346-6 plasmid unnamed5	Escherichia coli O6:H16 strain 2014EL-1346-6
1274365615	NZ_CP024254.1	Escherichia coli strain ATCC 43886 plasmid unnamed1	Escherichia coli strain ATCC 43886
1274365668	NZ_CP024255.1	Escherichia coli strain ATCC 43886 plasmid unnamed2	Escherichia coli strain ATCC 43886
1274369721	NZ_CP024258.1	Escherichia coli O25:H16 strain F5505-C1 plasmid unnamed1	Escherichia coli O25:H16 strain F5505-C1
1274369732	NZ_CP024259.1	Escherichia coli O25:H16 strain F5505-C1 plasmid unnamed2	Escherichia coli O25:H16 strain F5505-C1
1274371867	NZ_CP024264.1	Escherichia coli O169:H41 strain F6326-C1 plasmid unnamed1	Escherichia coli O169:H41 strain F6326-C1
1274371868	NZ_CP024265.1	Escherichia coli O169:H41 strain F6326-C1 plasmid unnamed2	Escherichia coli O169:H41 strain F6326-C1
1274372700	NZ_CP024480.1	Escherichia coli strain 2011C-4315 plasmid unnamed1	Escherichia coli strain 2011C-4315
1274372701	NZ_CP024481.1	Escherichia coli strain 2011C-4315 plasmid unnamed2	Escherichia coli strain 2011C-4315
1274397008	NZ_CP024229.1	Escherichia coli O25:NM strain 2014EL-1343-2 plasmid unnamed1	Escherichia coli O25:NM strain 2014EL-1343-2
1274397016	NZ_CP024230.1	Escherichia coli O25:NM strain 2014EL-1343-2 plasmid unnamed2	Escherichia coli O25:NM strain 2014EL-1343-2
1274397029	NZ_CP024231.1	Escherichia coli O25:NM strain 2014EL-1343-2 plasmid unnamed3	Escherichia coli O25:NM strain 2014EL-1343-2
1274403636	NZ_CP024244.1	Escherichia coli O128:H27 strain 90-9281 plasmid unnamed	Escherichia coli O128:H27 strain 90-9281
1274405767	NZ_CP024246.1	Escherichia coli O27:H7 strain B4103-1 plasmid unnamed1	Escherichia coli O27:H7 strain B4103-1
1274405768	NZ_CP024247.1	Escherichia coli O27:H7 strain B4103-1 plasmid unnamed2	Escherichia coli O27:H7 strain B4103-1
1274405769	NZ_CP024248.1	Escherichia coli O27:H7 strain B4103-1 plasmid unnamed3	Escherichia coli O27:H7 strain B4103-1
1274405893	NZ_CP024274.1	Escherichia coli strain F9792 plasmid unnamed	Escherichia coli strain F9792
1274406463	NZ_CP024276.1	Escherichia coli O6:H16 strain M9682-C1 plasmid unnamed1	Escherichia coli O6:H16 strain M9682-C1
1274406471	NZ_CP024277.1	Escherichia coli O6:H16 strain M9682-C1 plasmid unnamed2	Escherichia coli O6:H16 strain M9682-C1
1277273503	NZ_CP024651.1	Escherichia coli strain BH100 substr. MG2014 plasmid pAp	Escherichia coli strain BH100 substr. MG2014
1277281050	NZ_CP024721.1	Escherichia coli isolate NQ3 plasmid p1NQ3	Escherichia coli isolate NQ3
1277281086	NZ_CP024722.1	Escherichia coli isolate NQ3 plasmid p2NQ3	Escherichia coli isolate NQ3
1277282137	NZ_CP024718.1	Escherichia coli strain LS4 plasmid p1LS4	Escherichia coli strain LS4
1277282148	NZ_CP024719.1	Escherichia coli strain LS4 plasmid p2LS4	Escherichia coli strain LS4
1277288583	NZ_CP024662.1	Escherichia coli strain 90-9269 plasmid unnamed1	Escherichia coli strain 90-9269
1277288584	NZ_CP024663.1	Escherichia coli strain 90-9269 plasmid unnamed2	Escherichia coli strain 90-9269
1277288585	NZ_CP024664.1	Escherichia coli strain 90-9269 plasmid unnamed3	Escherichia coli strain 90-9269
1277288586	NZ_CP024665.1	Escherichia coli strain 90-9269 plasmid unnamed4	Escherichia coli strain 90-9269
1277288587	NZ_CP024666.1	Escherichia coli strain 90-9269 plasmid unnamed5	Escherichia coli strain 90-9269
1277289022	NZ_CP024668.1	Escherichia coli strain F5176C6 plasmid unnamed1	Escherichia coli strain F5176C6
1277289023	NZ_CP024669.1	Escherichia coli strain F5176C6 plasmid unnamed2	Escherichia coli strain F5176C6
1277289024	NZ_CP024670.1	Escherichia coli strain F5176C6 plasmid unnamed3	Escherichia coli strain F5176C6
1277289025	NZ_CP024671.1	Escherichia coli strain F5176C6 plasmid unnamed4	Escherichia coli strain F5176C6
1279615679	NZ_CP024827.1	Escherichia coli strain CREC-544 plasmid pCREC-544_1	Escherichia coli strain CREC-544
1279615680	NZ_CP024828.1	Escherichia coli strain CREC-544 plasmid pCREC-544_2	Escherichia coli strain CREC-544
1279615681	NZ_CP024829.1	Escherichia coli strain CREC-544 plasmid pCREC-544_3	Escherichia coli strain CREC-544
1279615945	NZ_CP024860.1	Escherichia coli strain AR_0014 plasmid unitig_1_pilon	Escherichia coli strain AR_0014
1279615946	NZ_CP024861.1	Escherichia coli strain AR_0014 plasmid unitig_2_pilon	Escherichia coli strain AR_0014
1279616027	NZ_CP024816.1	Escherichia coli strain CREC-629 plasmid pCREC-629_1	Escherichia coli strain CREC-629
1279616028	NZ_CP024817.1	Escherichia coli strain CREC-629 plasmid pCREC-629_2	Escherichia coli strain CREC-629
1279616029	NZ_CP024818.1	Escherichia coli strain CREC-629 plasmid pCREC-629_3	Escherichia coli strain CREC-629
1279616058	NZ_CP024822.1	Escherichia coli strain CREC-591 plasmid pCREC-591_1	Escherichia coli strain CREC-591
1279616059	NZ_CP024823.1	Escherichia coli strain CREC-591 plasmid pCREC-591_2	Escherichia coli strain CREC-591
1279616060	NZ_CP024824.1	Escherichia coli strain CREC-591 plasmid pCREC-591_3	Escherichia coli strain CREC-591
1279616061	NZ_CP024825.1	Escherichia coli strain CREC-591 plasmid pCREC-591_4	Escherichia coli strain CREC-591
1279616074	NZ_CP024856.1	Escherichia coli strain AR_0011 plasmid tig00001011_pilon	Escherichia coli strain AR_0011
1279616075	NZ_CP024857.1	Escherichia coli strain AR_0011 plasmid tig00001069_pilon	Escherichia coli strain AR_0011
1279616076	NZ_CP024858.1	Escherichia coli strain AR_0011 plasmid tig00013784_pilon	Escherichia coli strain AR_0011
1279623197	NZ_CP024852.1	Escherichia coli strain AR_0006 plasmid tig00000164	Escherichia coli strain AR_0006
1279623198	NZ_CP024853.1	Escherichia coli strain AR_0006 plasmid tig00000176	Escherichia coli strain AR_0006
1279623199	NZ_CP024854.1	Escherichia coli strain AR_0006 plasmid tig00000311	Escherichia coli strain AR_0006
1279623394	NZ_CP024863.1	Escherichia coli strain AR_0015 plasmid unitig_1_pilon	Escherichia coli strain AR_0015
1279623395	NZ_CP024864.1	Escherichia coli strain AR_0015 plasmid unitig_2_pilon	Escherichia coli strain AR_0015
1279623396	NZ_CP024865.1	Escherichia coli strain AR_0015 plasmid unitig_3_pilon	Escherichia coli strain AR_0015
1279626530	NZ_CP024831.1	Escherichia coli strain CREC-532 plasmid pCREC-532_1	Escherichia coli strain CREC-532
1279626531	NZ_CP024832.1	Escherichia coli strain CREC-532 plasmid pCREC-532_2	Escherichia coli strain CREC-532
1279626532	NZ_CP024833.1	Escherichia coli strain CREC-532 plasmid pCREC-532_3	Escherichia coli strain CREC-532
1280943020	NZ_CP024888.1	Escherichia coli strain AR_0019 plasmid tig00000138_pilon	Escherichia coli strain AR_0019
1280949603	NZ_CP024887.1	Escherichia coli strain AR_0017 plasmid unitig_1_pilon	Escherichia coli strain AR_0017
1293101177	NZ_CP024802.1	Escherichia coli strain AMA1167 plasmid pAMA1167-3	Escherichia coli strain AMA1167
1293101178	NZ_CP024803.1	Escherichia coli strain AMA1167 plasmid pAMA1167-4	Escherichia coli strain AMA1167
1293101179	NZ_CP024804.1	Escherichia coli strain AMA1167 plasmid pAMA1167-5	Escherichia coli strain AMA1167
1293101180	NZ_CP024805.1	Escherichia coli strain AMA1167 plasmid pAMA1167-NDM-5	Escherichia coli strain AMA1167
1293101181	NZ_CP024806.1	Escherichia coli strain AMA1167 plasmid pAMA1167-OXA-181	Escherichia coli strain AMA1167
1316777909	NZ_CP025329.1	Escherichia coli strain ExPEC XM plasmid unnamed	Escherichia coli strain ExPEC XM
1317306537	NZ_CP025402.1	Escherichia coli strain MS8345 plasmid pMS8345A	Escherichia coli strain MS8345
1317306538	NZ_CP025403.1	Escherichia coli strain MS8345 plasmid pMS8345B	Escherichia coli strain MS8345
1326093078	NZ_CP025252.1	Escherichia coli strain BH100 substr. MG2017 plasmid pApR	Escherichia coli strain BH100 substr. MG2017
1326093079	NZ_CP025253.1	Escherichia coli strain BH100 substr. MG2017 plasmid pBH100-1	Escherichia coli strain BH100 substr. MG2017
1326141592	NZ_CP024144.1	Escherichia coli strain 14EC029 plasmid p14EC029c	Escherichia coli strain 14EC029
1326141593	NZ_CP024145.1	Escherichia coli strain 14EC029 plasmid p14EC029d	Escherichia coli strain 14EC029
1326141594	NZ_CP024146.1	Escherichia coli strain 14EC029 plasmid p14EC029e	Escherichia coli strain 14EC029
1326144044	NZ_CP024148.1	Escherichia coli strain 14EC033 plasmid p14EC033a	Escherichia coli strain 14EC033
1326144052	NZ_CP024149.1	Escherichia coli strain 14EC033 plasmid p14EC033b	Escherichia coli strain 14EC033
1326144058	NZ_CP024150.1	Escherichia coli strain 14EC033 plasmid p14EC033c	Escherichia coli strain 14EC033
1326144063	NZ_CP024151.1	Escherichia coli strain 14EC033 plasmid p14EC033d	Escherichia coli strain 14EC033
1326144069	NZ_CP024152.1	Escherichia coli strain 14EC033 plasmid p14EC033e	Escherichia coli strain 14EC033
1326144077	NZ_CP024153.1	Escherichia coli strain 14EC033 plasmid p14EC033f	Escherichia coli strain 14EC033
1326144083	NZ_CP024154.1	Escherichia coli strain 14EC033 plasmid p14EC033g	Escherichia coli strain 14EC033
1326195198	NZ_CP024615.1	Escherichia coli strain SMN152SH1 plasmid pO177C1	Escherichia coli strain SMN152SH1
1326195199	NZ_CP024616.1	Escherichia coli strain SMN152SH1 plasmid pO177B1	Escherichia coli strain SMN152SH1
1326195203	NZ_CP024617.1	Escherichia coli strain SMN152SH1 plasmid pO177A1	Escherichia coli strain SMN152SH1
1328047559	NZ_CP025625.1	Escherichia coli strain SCEC020007 plasmid pBOKZ_020007	Escherichia coli strain SCEC020007
1328047589	NZ_CP025626.1	Escherichia coli strain SCEC020007 plasmid pNDM5_020007	Escherichia coli strain SCEC020007
1331156037	NZ_CP025740.1	Escherichia coli strain Ec40 plasmid unnamed	Escherichia coli strain Ec40
1333944987	NZ_CP025946.1	Escherichia coli strain SCEC020023 plasmid p2_020023	Escherichia coli strain SCEC020023
1333944989	NZ_CP025948.1	Escherichia coli strain SCEC020023 plasmid pNDM21_020023	Escherichia coli strain SCEC020023
1333944990	NZ_CP025949.1	Escherichia coli strain SCEC020023 plasmid pCTXM55_020023	Escherichia coli strain SCEC020023
1337294124	NZ_CP026203.1	Escherichia coli strain ECONIH5 plasmid pECO-a7e8	Escherichia coli strain ECONIH5
1337294125	NZ_CP026204.1	Escherichia coli strain ECONIH5 plasmid pKPC-bca9	Escherichia coli strain ECONIH5
1337294126	NZ_CP026205.1	Escherichia coli strain ECONIH5 plasmid pKPC-e3ee	Escherichia coli strain ECONIH5
1337294127	NZ_CP026206.1	Escherichia coli strain ECONIH5 plasmid pECO-cbb3	Escherichia coli strain ECONIH5
1337294128	NZ_CP026207.1	Escherichia coli strain ECONIH5 plasmid pECO-dc1b	Escherichia coli strain ECONIH5
1337294129	NZ_CP026208.1	Escherichia coli strain ECONIH5 plasmid pECO-109b	Escherichia coli strain ECONIH5
1337294130	NZ_CP026209.1	Escherichia coli strain ECONIH5 plasmid unnamed	Escherichia coli strain ECONIH5
1337294353	NZ_CP026200.1	Escherichia coli strain ECONIH6 plasmid pECO-6dfa	Escherichia coli strain ECONIH6
1337294354	NZ_CP026201.1	Escherichia coli strain ECONIH6 plasmid pNDM-d2e9	Escherichia coli strain ECONIH6
1339771252	NZ_CP025751.1	Escherichia coli strain CV839-06 plasmid pCV839-06-p1	Escherichia coli strain CV839-06
1339771253	NZ_CP025752.1	Escherichia coli strain CV839-06 plasmid pCV839-06-p2	Escherichia coli strain CV839-06
1340958934	NZ_CP024975.1	Escherichia coli strain CV839-15 plasmid pCV839-15-p1	Escherichia coli strain CV839-15
1340958935	NZ_CP024976.1	Escherichia coli strain CV839-15 plasmid pCV839-15-p2	Escherichia coli strain CV839-15
1340958936	NZ_CP024977.1	Escherichia coli strain CV839-15 plasmid pCV839-15-p3	Escherichia coli strain CV839-15
1348948549	NZ_CP026400.1	Escherichia coli strain ECONIH4 plasmid pECO-5e72	Escherichia coli strain ECONIH4
1348948550	NZ_CP026401.1	Escherichia coli strain ECONIH4 plasmid pKPC-b33e	Escherichia coli strain ECONIH4
1348948551	NZ_CP026402.1	Escherichia coli strain ECONIH4 plasmid pECO-e618	Escherichia coli strain ECONIH4
1348948552	NZ_CP026403.1	Escherichia coli strain ECONIH4 plasmid pECO-816c	Escherichia coli strain ECONIH4
1348948553	NZ_CP026404.1	Escherichia coli strain ECONIH4 plasmid pECO-6357	Escherichia coli strain ECONIH4
1348948554	NZ_CP026405.1	Escherichia coli strain ECONIH4 plasmid pECO-c85f	Escherichia coli strain ECONIH4
1352586566	NZ_CP026579.1	Escherichia coli strain WCHEC005237 plasmid pRmtB1_005237	Escherichia coli strain WCHEC005237
1352915910	NZ_CP026724.1	Escherichia coli strain 266917_2 plasmid p266917_2_01	Escherichia coli strain 266917_2
1352915911	NZ_CP026725.1	Escherichia coli strain 266917_2 plasmid p266917_2_02	Escherichia coli strain 266917_2
1352915912	NZ_CP026726.1	Escherichia coli strain 266917_2 plasmid p266917_2_03	Escherichia coli strain 266917_2
1352915913	NZ_CP026727.1	Escherichia coli strain 266917_2 plasmid p266917_2_04	Escherichia coli strain 266917_2
1352915914	NZ_CP026728.1	Escherichia coli strain 266917_2 plasmid p266917_2_05	Escherichia coli strain 266917_2
1353024838	NZ_CP026754.1	Escherichia coli strain AR_0077 plasmid tig00000042_pilon	Escherichia coli strain AR_0077
1353473304	NZ_CP026492.1	Escherichia coli strain HS13-1 plasmid pHS13-1-IncHI2	Escherichia coli strain HS13-1
1353473305	NZ_CP026493.1	Escherichia coli strain HS13-1 plasmid pHS13-1-Col	Escherichia coli strain HS13-1
1353473306	NZ_CP026494.1	Escherichia coli strain HS13-1 plasmid pHS13-1-IncF	Escherichia coli strain HS13-1
1353486062	NZ_CP026474.1	Escherichia coli strain KBN10P04869 plasmid pKBN10P04869A	Escherichia coli strain KBN10P04869
1353486063	NZ_CP026475.1	Escherichia coli strain KBN10P04869 plasmid pKBN10P04869B	Escherichia coli strain KBN10P04869
1353486064	NZ_CP026476.1	Escherichia coli strain KBN10P04869 plasmid pKBN10P04869C	Escherichia coli strain KBN10P04869
1355918775	NZ_CP024652.2	Escherichia coli strain BH100 substr. MG2014 plasmid pBH100-1	Escherichia coli strain BH100 substr. MG2014
1358021116	NZ_CP027129.1	Escherichia coli strain AR_0372 plasmid unnamed5	Escherichia coli strain AR_0372
1358021117	NZ_CP027130.1	Escherichia coli strain AR_0372 plasmid unnamed1	Escherichia coli strain AR_0372
1358021118	NZ_CP027131.1	Escherichia coli strain AR_0372 plasmid unnamed3	Escherichia coli strain AR_0372
1358021119	NZ_CP027132.1	Escherichia coli strain AR_0372 plasmid unnamed2	Escherichia coli strain AR_0372
1358021120	NZ_CP027133.1	Escherichia coli strain AR_0372 plasmid unnamed4	Escherichia coli strain AR_0372
1358042033	NZ_CP027135.1	Escherichia coli strain AR_0369 plasmid unnamed3	Escherichia coli strain AR_0369
1358042034	NZ_CP027136.1	Escherichia coli strain AR_0369 plasmid unnamed4	Escherichia coli strain AR_0369
1358042035	NZ_CP027137.1	Escherichia coli strain AR_0369 plasmid unnamed1	Escherichia coli strain AR_0369
1358042036	NZ_CP027138.1	Escherichia coli strain AR_0369 plasmid unnamed2	Escherichia coli strain AR_0369
1358042037	NZ_CP027139.1	Escherichia coli strain AR_0369 plasmid unnamed5	Escherichia coli strain AR_0369
1359911005	NZ_CP027392.1	Escherichia coli O104:H4 strain FDAARGOS_349 plasmid unnamed2	Escherichia coli O104:H4 strain FDAARGOS_349
1359911006	NZ_CP027393.1	Escherichia coli O104:H4 strain FDAARGOS_349 plasmid unnamed4	Escherichia coli O104:H4 strain FDAARGOS_349
1359911008	NZ_CP027395.1	Escherichia coli O104:H4 strain FDAARGOS_349 plasmid unnamed1	Escherichia coli O104:H4 strain FDAARGOS_349
1359911009	NZ_CP027396.1	Escherichia coli O104:H4 strain FDAARGOS_349 plasmid unnamed3	Escherichia coli O104:H4 strain FDAARGOS_349
1360592258	NZ_CP025708.1	Escherichia coli strain YDC107 plasmid pYDC107_184	Escherichia coli strain YDC107
1360592260	NZ_CP025710.1	Escherichia coli strain YDC107 plasmid pYDC107_70	Escherichia coli strain YDC107
1360592261	NZ_CP025711.1	Escherichia coli strain YDC107 plasmid pYDC107_41	Escherichia coli strain YDC107
1360744504	NZ_CP027256.1	Escherichia coli strain EC11 plasmid unnamed1	Escherichia coli strain EC11
1360744505	NZ_CP027257.1	Escherichia coli strain EC11 plasmid unnamed2	Escherichia coli strain EC11
1360744506	NZ_CP027258.1	Escherichia coli strain EC11 plasmid unnamed3	Escherichia coli strain EC11
1360744507	NZ_CP027259.1	Escherichia coli strain EC11 plasmid unnamed4	Escherichia coli strain EC11
1360744745	NZ_CP027535.1	Escherichia coli strain AR_0081 plasmid unnamed1	Escherichia coli strain AR_0081
1360744746	NZ_CP027536.1	Escherichia coli strain AR_0081 plasmid unnamed3	Escherichia coli strain AR_0081
1360744747	NZ_CP027537.1	Escherichia coli strain AR_0081 plasmid unnamed2	Escherichia coli strain AR_0081
1360790599	NZ_CP027199.1	Escherichia coli strain WCHEC025943 plasmid p1_025943	Escherichia coli strain WCHEC025943
1360790600	NZ_CP027200.1	Escherichia coli strain WCHEC025943 plasmid p2_025943	Escherichia coli strain WCHEC025943
1360818628	NZ_CP027125.1	Escherichia coli strain AR_0374 plasmid unnamed3	Escherichia coli strain AR_0374
1360818632	NZ_CP027127.1	Escherichia coli strain AR_0374 plasmid unnamed2	Escherichia coli strain AR_0374
1360818635	NZ_CP027128.1	Escherichia coli strain AR_0374 plasmid unnamed1	Escherichia coli strain AR_0374
1371719114	NZ_CP027106.1	Escherichia coli strain RM14721 plasmid pRM14721	Escherichia coli strain RM14721
1371994326	NZ_CP027320.1	Escherichia coli strain 2014C-3084 plasmid unnamed1	Escherichia coli strain 2014C-3084
1371994327	NZ_CP027321.1	Escherichia coli strain 2014C-3084 plasmid unnamed2	Escherichia coli strain 2014C-3084
1371995874	NZ_CP027386.1	Escherichia coli strain 2014C-3057 plasmid unnamed	Escherichia coli strain 2014C-3057
1371996108	NZ_CP027353.1	Escherichia coli strain 2012C-4606 plasmid unnamed1	Escherichia coli strain 2012C-4606
1371996109	NZ_CP027354.1	Escherichia coli strain 2012C-4606 plasmid unnamed2	Escherichia coli strain 2012C-4606
1371996419	NZ_CP027583.1	Escherichia coli strain 2013C-4538 plasmid unnamed	Escherichia coli strain 2013C-4538
[truncated: 4,970 more rows]

## Sheet: Table S4
Supplementary Table S4: Summary of statistical comparisons of genomic distances
PHAGES – k4freq
[truncated: 73 more rows]

## Sheet: Table S5
Supplementary Table S5: Lysogenic activity of K. pneumoniae phages
[truncated: 69 more rows]

[truncated: 1 more sheets: Table S6]
